# Supplementary material for: Lysine-Specific Demethylase 1 (LSD1/KDM1A) Contributes to Colorectal Tumorigenesis via Activation of the Wnt/Β-Catenin Pathway by Down-Regulating Dickkopf-1 (DKK1)
Source: PLoS One. 2013 Jul 26;8(7):e70077. doi: 10.1371/journal.pone.0070077 (PMC3724785; doi:10.1371/journal.pone.0070077)
Supplement: Table S1 — RNA-Seq differential gene expression analysis of the cells before and after knocking out LSD1. (XLS) [file pone.0070077.s001.xls]

## Sheet: RPKM
Chromosome	Gene Name	Accession Num	RPKM LSD1+/+	RPKM LSD1-/-	PRKM Ratio	q-Value LSD1+/+ to LSD1-/-	KEGG Pathway	Description	Gene Ontology
chr19:47730198-47730278	MIR3190	NR_036158	470.767	0		0.907464
chr17:79418129-79418214	MIR3186	NR_036152	366.138	0		0.907464
chr16:820182-820277	MIR662	NR_030384	234.397	0		0.907464
chr17:38183794-38183898	SNORD124	NR_003692	164.829	0		0.907464
chr4:54362231-54362558	LNX1	NM_032622	45.8067	0		0.426752			GO:0051260; GO:0046872; GO:0042787; GO:0030165; GO:0016874; GO:0008270; GO:0005737; GO:0005515; GO:0004842
chr5:131528264-131563556	P4HA2	NM_001142599	36.5446	0		0.0146429	ko00330		GO:0046872; GO:0031418; GO:0018401; GO:0016706; GO:0016702; GO:0009055; GO:0005788; GO:0005783; GO:0005506; GO:0005488; GO:0004656
chr19:3506275-3536770	FZR1	NM_016263	32.5918	0		0.0137811	ko04120; ko04111; ko04914; ko04110		GO:0090344; GO:0070979; GO:0070306; GO:0051488; GO:0051439; GO:0051437; GO:0051436; GO:0051301; GO:0045732; GO:0040020; GO:0031572; GO:0031145; GO:0016310; GO:0016301; GO:0008284; GO:0007067; GO:0006281; GO:0005829; GO:0005737; GO:0005680; GO:0005654; GO:0005634; GO:0005515; GO:0000278; GO:0000084
chr7:91828282-91875414	KRIT1	NM_194456	24.0044	0		0.982422			GO:2000352; GO:2000114; GO:0045454; GO:0043234; GO:0032092; GO:0016525; GO:0016020; GO:0010596; GO:0007264; GO:0005911; GO:0005856; GO:0005515; GO:0005083; GO:0001937
chr22:36134782-36425014	RBM9	NM_001082578	22.3567	0		0.00443929			GO:0045892; GO:0042127; GO:0030520; GO:0016070; GO:0010724; GO:0008380; GO:0008134; GO:0006397; GO:0005737; GO:0005730; GO:0005634; GO:0005515; GO:0003723; GO:0003714; GO:0000381; GO:0000166
chr9:127282969-127533596	NR6A1	NM_001489	21.8514	0		0.0145937			GO:0046872; GO:0043565; GO:0042803; GO:0030522; GO:0010467; GO:0008283; GO:0008270; GO:0007283; GO:0007276; GO:0005667; GO:0005654; GO:0005634; GO:0004879; GO:0004872; GO:0003707; GO:0003700; GO:0003677; GO:0000122
chr14:55034242-55260033	SAMD4A	NM_015589	20.3164	0		0.92184			GO:0045727; GO:0045202; GO:0042995; GO:0030425; GO:0030371; GO:0030054; GO:0019717; GO:0017148; GO:0005737
chr7:77428084-77586821	PHTF2	NM_001127358	15.9041	0		0.86661			GO:0006355; GO:0005783; GO:0005634; GO:0003677
chr17:65373364-65690925	PITPNC1	NM_012417	13.0555	0		0.0444868			GO:0008526; GO:0008289; GO:0007165; GO:0006869; GO:0006810; GO:0005737; GO:0005622; GO:0005515
chr10:35415800-35501886	CREM	NM_183013	11.8774	0		0.997694			GO:0046983; GO:0043565; GO:0030154; GO:0008140; GO:0007283; GO:0007275; GO:0007165; GO:0006355; GO:0005634; GO:0005515; GO:0003700; GO:0003677
chr16:89160253-89222169	ACSF3	NR_023316	9.33416	0		0.130935			GO:0016878; GO:0016874; GO:0006631; GO:0006629; GO:0005739; GO:0005524; GO:0000166
chr16:4838397-4846282	LOC440335	NR_029454	7.55837	0		0.624708
chr20:5931297-5976791	MCM8	NM_032485	6.70501	0		0.0766573			GO:0017111; GO:0006355; GO:0006271; GO:0006260; GO:0005654; GO:0005634; GO:0005524; GO:0003677; GO:0000278; GO:0000216; GO:0000166; GO:0000084; GO:0000082; GO:0000075
chr17:18218588-18266867	SHMT1	NM_148918	5.44873	0		0.124567	ko00670; ko00260; ko00460; ko00680		GO:0051289; GO:0051262; GO:0046655; GO:0045329; GO:0042803; GO:0034641; GO:0030170; GO:0019264; GO:0016740; GO:0016597; GO:0009113; GO:0008732; GO:0006767; GO:0006766; GO:0006730; GO:0006565; GO:0005829; GO:0005739; GO:0005737; GO:0005634; GO:0004372
chr20:42984036-43061245	HNF4A	NM_178849	5.2643	0		0.0708108	ko04950		GO:2000189; GO:0070491; GO:0070328; GO:0060398; GO:0060395; GO:0055091; GO:0055088; GO:0051591; GO:0050796; GO:0050732; GO:0046872; GO:0045944; GO:0045930; GO:0045893; GO:0045723; GO:0045722; GO:0045216; GO:0044212; GO:0043565; GO:0043433; GO:0042803; GO:0042593; GO:0042524; GO:0042493; GO:0033613; GO:0033159; GO:0032534; GO:0031018; GO:0030308; GO:0030154; GO:0023019; GO:0019216; GO:0016290; GO:…
chr16:87984997-88110924	BANP	NM_001173543	4.0132	0		1			GO:0016568; GO:0007275; GO:0007049; GO:0006355; GO:0005634; GO:0003677
chr3:170779301-171178272	TNIK	NM_001161560	3.61312	0		1			GO:0055037; GO:0048814; GO:0046777; GO:0031532; GO:0016055; GO:0007399; GO:0007256; GO:0007243; GO:0007010; GO:0006950; GO:0006468; GO:0005856; GO:0005737; GO:0005730; GO:0005634; GO:0005524; GO:0005515; GO:0005083; GO:0004674; GO:0000166
chr1:24645801-24690972	GRHL3	NM_198173	3.39908	0		1			GO:0090179; GO:0090103; GO:0045944; GO:0042060; GO:0032956; GO:0032321; GO:0008544; GO:0007417; GO:0007398; GO:0007389; GO:0005634; GO:0003677; GO:0001736; GO:0000981
chr16:3115312-3119668	IL32	NM_001012631	2.4707	0		1			GO:0007155; GO:0006955; GO:0006952; GO:0005615; GO:0005576; GO:0005125
chr5:65240632-65241401	LOC100303749	NR_028474	2.354	0		1
chr17:27041298-27045286	RAB34	NM_001144943	1.84895	0		1			GO:0019001; GO:0015031; GO:0007264; GO:0006897; GO:0005794; GO:0005769; GO:0005737; GO:0005730; GO:0005634; GO:0005525; GO:0003924; GO:0001726; GO:0000166
chr2:20425034-20427748	LOC100131373	XR_109790	1.76971	0		1
chr8:133787603-133861052	PHF20L1	NM_016018	1.40203	0		1			GO:0046872; GO:0008270
chr3:10326102-10335133	GHRL	NR_024133	0.992719	0		1	ko04080		GO:0061098; GO:0060399; GO:0060124; GO:0060079; GO:0051965; GO:0051464; GO:0051461; GO:0051216; GO:0050728; GO:0046697; GO:0046676; GO:0046010; GO:0045409; GO:0043627; GO:0043400; GO:0043066; GO:0042536; GO:0042322; GO:0042127; GO:0040018; GO:0040013; GO:0032691; GO:0032100; GO:0032024; GO:0031768; GO:0030424; GO:0030296; GO:0030252; GO:0030141; GO:0016608; GO:0016525; GO:0016358; GO:0009755; GO:…
chr16:2867163-2871720	PRSS21	NM_006799	0.972092	0		1			GO:0031225; GO:0008236; GO:0008233; GO:0006508; GO:0005886; GO:0005737; GO:0005624; GO:0004252
chr19:51532347-51538148	KLK12	NM_019598	0.921295	0		1			GO:0008236; GO:0008233; GO:0006508; GO:0005625; GO:0005576; GO:0004252; GO:0003824
chr22:47311223-47311916	FLJ32756	XR_109737	0.906266	0		1
chr3:156544095-156643045	LEKR1	NM_001004316	0.841427	0		1
chr6:31582993-31584798	AIF1	NM_001623	0.815191	0		1			GO:0070887; GO:0051602; GO:0051017; GO:0051015; GO:0048678; GO:0048661; GO:0045429; GO:0043204; GO:0043066; GO:0034097; GO:0032870; GO:0032587; GO:0031668; GO:0030335; GO:0030027; GO:0014739; GO:0010629; GO:0008285; GO:0007050; GO:0006954; GO:0006950; GO:0005886; GO:0005884; GO:0005856; GO:0005829; GO:0005737; GO:0005634; GO:0005509; GO:0001934; GO:0001891; GO:0001726
chr15:94841429-95027181	MCTP2	NM_018349	0.800185	0		1			GO:0019722; GO:0016021; GO:0016020; GO:0005624; GO:0005544; GO:0005509
chr7:98444110-98467673	TMEM130	NM_001134450	0.695425	0		1			GO:0016021; GO:0016020; GO:0005794; GO:0000139
chr9:6467595-6470375	C9orf38	XR_108926	0.517319	0		1
chr3:71803200-71804328	GPR27	NM_018971	0.480269	0		1			GO:0016021; GO:0007186; GO:0007165; GO:0005886; GO:0004930; GO:0004872; GO:0004871
chr5:147830594-148033739	HTR4	NM_001040173	0.387991	0		1	ko04080; ko04020		GO:0016021; GO:0008284; GO:0007214; GO:0007210; GO:0007189; GO:0007187; GO:0007186; GO:0005887; GO:0005886; GO:0005768; GO:0005737; GO:0005624; GO:0004993; GO:0004930; GO:0004872; GO:0004871
chr15:45670897-45672321	LOC145663	NR_033252	0.36388	0		1
chr4:646965-664681	PDE6B	NM_000283	0.345013	0		1	ko04744; ko00230		GO:0060041; GO:0051480; GO:0050896; GO:0047555; GO:0046872; GO:0046037; GO:0030168; GO:0016787; GO:0016020; GO:0009583; GO:0008081; GO:0007603; GO:0007601; GO:0007596; GO:0007165; GO:0005829
chr6:19803190-19804973	LOC100506885	XR_108682	0.336597	0		1
chr10:695887-711109	C10orf108	NR_027152	0.335128	0		1
chr2:1417232-1546499	TPO	NM_000547	0.316175	0		1	ko04060; ko05320; ko00350; ko04640; ko04630		GO:0042744; GO:0042446; GO:0035162; GO:0034641; GO:0020037; GO:0016491; GO:0009986; GO:0006979; GO:0005887; GO:0005886; GO:0005737; GO:0005509; GO:0004601; GO:0004447
chr13:46627321-46679211	CPB2	NM_001872	0.294061	0		1	ko04974; ko04610; ko04972		GO:0051918; GO:0046872; GO:0042493; GO:0009408; GO:0008270; GO:0008237; GO:0008233; GO:0008152; GO:0007596; GO:0006508; GO:0005615; GO:0005576; GO:0004181
chr17:41717756-41739262	MEOX1	NM_001040002	0.247823	0		1			GO:0071837; GO:0045944; GO:0043565; GO:0008150; GO:0007275; GO:0005730; GO:0005634; GO:0005575; GO:0003700; GO:0003682; GO:0003677; GO:0003674; GO:0001757
chr1:183524696-183560056	NCF2	NM_001127651	0.246376	0		1	ko05140; ko04670; ko04145		GO:0055093; GO:0048365; GO:0045777; GO:0045730; GO:0045087; GO:0043525; GO:0043020; GO:0042554; GO:0042493; GO:0034616; GO:0033993; GO:0032870; GO:0032570; GO:0032496; GO:0016175; GO:0014823; GO:0014070; GO:0009749; GO:0009055; GO:0008022; GO:0007568; GO:0006968; GO:0006801; GO:0005737; GO:0005730; GO:0005624; GO:0005515; GO:0001669
chr9:131683173-131704320	PHYHD1	NM_001100876	0.237493	0		1			GO:0046872; GO:0016702; GO:0016491
chrX:55035487-55057497	ALAS2	NM_000032	0.230116	0		1	ko00330; ko00860		GO:0050662; GO:0042541; GO:0033014; GO:0032364; GO:0030218; GO:0030170; GO:0016769; GO:0016746; GO:0016594; GO:0009058; GO:0006879; GO:0006783; GO:0006778; GO:0005759; GO:0005743; GO:0005739; GO:0005515; GO:0003870; GO:0001666
chrX:69642880-69653241	GDPD2	NM_001171192	0.209407	0		1	ko00600		GO:0047394; GO:0046872; GO:0016787; GO:0016021; GO:0008889; GO:0006629; GO:0006071; GO:0005886; GO:0005856; GO:0005737
chr1:19725372-19727708	LOC644083	XR_108368	0.208327	0		1
chr2:54480314-54483409	TSPYL6	NM_001003937	0.15366	0		1		TSPY-like 6	GO:0006334; GO:0005634
chr17:40905931-40913275	LOC100190938	NR_024462	0.150742	0		1
chr1:180123967-180169860	QSOX1	NM_001004128	0.137518	0		1			GO:0045454; GO:0030173; GO:0016971; GO:0016491; GO:0016021; GO:0016020; GO:0006467; GO:0005794; GO:0005615; GO:0005576; GO:0000139
chr22:45277041-45405809	PHF21B	NM_001135862	0.129826	0		1			GO:0046872; GO:0008270
chr1:193028291-193060971	TROVE2	NM_001173525	0.10937	0		1	ko05322		GO:0030529; GO:0006383; GO:0005737; GO:0005730; GO:0005634; GO:0003723
chrX:65382432-65487231	HEPH	NM_138737	0.103664	0		1			GO:0055085; GO:0048471; GO:0046872; GO:0030218; GO:0016491; GO:0016021; GO:0006879; GO:0006825; GO:0006811; GO:0005886; GO:0005507
chr11:58975982-58980494	MPEG1	NM_001039396	0.103134	0		1		macrophage expressed 1	GO:0016021; GO:0016020
chr18:44558942-44561988	TCEB3B	NM_016427	0.0781541	0		1			GO:0032784; GO:0016021; GO:0006366; GO:0005634; GO:0003677
chr7:102815459-102920913	DPY19L2P2	NR_027768	0.0639017	0		1
chr12:102789644-102872429	IGF1	NM_001111283	0.0630387	0		1	ko05215; ko04960; ko04150; ko04914; ko05214; ko05218; ko05414; ko05200; ko04115; ko04730; ko05410; ko04510; ko04114		GO:0090201; GO:0070886; GO:0070373; GO:0060766; GO:0060741; GO:0060740; GO:0060736; GO:0060527; GO:0060510; GO:0060509; GO:0060463; GO:0060426; GO:0051897; GO:0051450; GO:0051246; GO:0050731; GO:0050679; GO:0050650; GO:0048754; GO:0048661; GO:0048286; GO:0048146; GO:0048015; GO:0046579; GO:0046326; GO:0045944; GO:0045893; GO:0045840; GO:0045821; GO:0045740; GO:0045725; GO:0045669; GO:0045445; GO:…
chrX:123509752-124097666	ODZ1	NM_001163278	0.0350805	0		1			GO:0016021; GO:0016020; GO:0008285; GO:0008201; GO:0007399; GO:0007165; GO:0006955; GO:0005576
chr12:2162415-2807115	CACNA1C	NM_199460	0.032406	0		1	ko04912; ko04010; ko05010; ko05412; ko04930; ko04720; ko05414; ko04270; ko04020; ko04260; ko05410		GO:0060402; GO:0055085; GO:0051925; GO:0050796; GO:0016021; GO:0014069; GO:0007411; GO:0007204; GO:0006811; GO:0006112; GO:0005891; GO:0005886; GO:0005737; GO:0005516; GO:0005515; GO:0005245; GO:0005244
chr6:160101892-160114362	SOD2	NM_001024465	0.0255664	0		1	ko05016; ko04146		GO:0071361; GO:0055093; GO:0055072; GO:0051881; GO:0051602; GO:0051289; GO:0050790; GO:0050665; GO:0048773; GO:0048678; GO:0048666; GO:0048147; GO:0046872; GO:0046686; GO:0045599; GO:0045429; GO:0043524; GO:0043066; GO:0042802; GO:0042645; GO:0042554; GO:0042542; GO:0042493; GO:0034021; GO:0033591; GO:0032496; GO:0032364; GO:0031667; GO:0030145; GO:0030097; GO:0022904; GO:0019825; GO:0019430; GO:…
chr19:39833084-39881776	SAMD4B	NM_018028	0.0115907	0		1
chr14:24583905-24594451	DCAF11	NM_025230	0.0085453	0		0.969643			GO:0080008; GO:0016567
chr2:37331356-37384319	EIF2AK2	NM_002759	0.00274761	0		1	ko05160; ko04141		GO:0046777; GO:0044419; GO:0033689; GO:0030968; GO:0030683; GO:0019058; GO:0019054; GO:0019048; GO:0016772; GO:0009615; GO:0008601; GO:0008285; GO:0006926; GO:0006468; GO:0006412; GO:0005829; GO:0005622; GO:0005524; GO:0005515; GO:0004715; GO:0004694; GO:0004674; GO:0004672; GO:0003725; GO:0000166
chr20:42984036-43061245	HNF4A	NM_000457	0.00210264	0		1	ko04950		GO:2000189; GO:0070491; GO:0070328; GO:0060398; GO:0060395; GO:0055091; GO:0055088; GO:0051591; GO:0050796; GO:0050732; GO:0046872; GO:0045944; GO:0045930; GO:0045893; GO:0045723; GO:0045722; GO:0045216; GO:0044212; GO:0043565; GO:0043433; GO:0042803; GO:0042593; GO:0042524; GO:0042493; GO:0033613; GO:0033159; GO:0032534; GO:0031018; GO:0030308; GO:0030154; GO:0023019; GO:0019216; GO:0016290; GO:…
chr3:170779301-171178272	TNIK	NM_015028	0.00172795	0		1			GO:0055037; GO:0048814; GO:0046777; GO:0031532; GO:0016055; GO:0007399; GO:0007256; GO:0007243; GO:0007010; GO:0006950; GO:0006468; GO:0005856; GO:0005737; GO:0005730; GO:0005634; GO:0005524; GO:0005515; GO:0005083; GO:0004674; GO:0000166
chr1:204797781-204991950	NFASC	NM_001005388	0.0010881	0		1	ko04514		GO:0071205; GO:0050808; GO:0042552; GO:0033270; GO:0033268; GO:0033010; GO:0030913; GO:0030424; GO:0019226; GO:0016021; GO:0007422; GO:0007411; GO:0007155; GO:0005886; GO:0002175
chr10:11047258-11378674	CUGBP2	NM_001025076	0.000501228	0		1			GO:0008016; GO:0006397; GO:0006396; GO:0005737; GO:0005634; GO:0003723; GO:0000166
chr20:10015686-10038558	ANKRD5	NM_022096	0.000261894	0		1			GO:0005509
chr2:169643048-169721960	NOSTRIN	NM_001171631	0.000144259	0		1			GO:0050999; GO:0046209; GO:0030666; GO:0016023; GO:0006897; GO:0005886; GO:0005856; GO:0005737; GO:0005515
chr19:50194398-50216988	CPT1C	NM_001136052	0.000105267	0		1	ko00071; ko04920; ko03320		GO:0016746; GO:0016021; GO:0016020; GO:0009437; GO:0006631; GO:0006629; GO:0005789; GO:0005741; GO:0005739; GO:0004095
chr11:72287184-72385494	PDE2A	NM_001146209	0.000104161	0		1	ko00230		GO:0097011; GO:0071560; GO:0071321; GO:0071260; GO:0070588; GO:0061028; GO:0050729; GO:0048471; GO:0046872; GO:0046069; GO:0045121; GO:0043117; GO:0043116; GO:0042803; GO:0042734; GO:0036006; GO:0035690; GO:0033159; GO:0030911; GO:0030818; GO:0030553; GO:0030552; GO:0030224; GO:0030168; GO:0019934; GO:0019933; GO:0016787; GO:0008152; GO:0008144; GO:0008081; GO:0007596; GO:0007165; GO:0006626; GO:…
chr19:53611131-53636173	ZNF415	NR_028343	9.43416e-05	0		1			GO:0046872; GO:0015630; GO:0008270; GO:0006355; GO:0005737; GO:0005730; GO:0005634; GO:0005622; GO:0003677
chr7:150688143-150701023	NOS3	NM_000603	8.79195e-06	0		1	ko00330; ko04020		GO:0071560; GO:0055094; GO:0055093; GO:0051926; GO:0051346; GO:0050999; GO:0050880; GO:0050661; GO:0050660; GO:0048662; GO:0046872; GO:0046870; GO:0046209; GO:0045909; GO:0045766; GO:0045471; GO:0045177; GO:0043542; GO:0043434; GO:0043267; GO:0043200; GO:0043065; GO:0042493; GO:0034618; GO:0034617; GO:0034405; GO:0034097; GO:0032496; GO:0032355; GO:0031663; GO:0031284; GO:0030666; GO:0030324; GO:…
chr11:72975569-73009664	P2RY6	NM_176798	2.23737e-06	0		1	ko04080		GO:0045028; GO:0007200; GO:0005887; GO:0005886; GO:0004930; GO:0004872; GO:0004871
chr12:57866037-57873633	ARHGAP9	NM_032496	0.776821	2.78706e-06	278724	1		Rho GTPase activating protein 9	GO:0051056; GO:0043547; GO:0007264; GO:0007165; GO:0005829; GO:0005622; GO:0005096
chr1:6086342-6161240	KCNAB2	NM_003636	32.4286	0.00073867	43901.3	0.997694			GO:0055085; GO:0044224; GO:0016021; GO:0015459; GO:0007268; GO:0006813; GO:0006811; GO:0005886; GO:0005737; GO:0005249; GO:0005244
chr3:130745693-131069309	NEK11	NM_024800	1.69364	5.21953e-05	32448.1	1			GO:0046872; GO:0031573; GO:0031572; GO:0007243; GO:0007049; GO:0006468; GO:0005730; GO:0005634; GO:0005524; GO:0005515; GO:0004674; GO:0000166
chr10:88428205-88495825	LDB3	NM_001171610	0.425847	1.82311e-05	23358.3	1			GO:0048471; GO:0046872; GO:0031143; GO:0030018; GO:0008270; GO:0005856; GO:0005737; GO:0005515
chr17:43209966-43221543	ACBD4	NM_001135704	13.9688	0.000604321	23114.9	0.997694			GO:0005488; GO:0000062
chr1:225674533-225705692	ENAH	NM_001008493	20.3485	0.000887288	22933.4	0.991478	ko04810		GO:0051289; GO:0050852; GO:0050699; GO:0046907; GO:0045202; GO:0030175; GO:0030054; GO:0030027; GO:0017124; GO:0008154; GO:0007411; GO:0006928; GO:0005925; GO:0005886; GO:0005856; GO:0005829; GO:0005737; GO:0005522; GO:0003779; GO:0001843; GO:0001725
chr2:152341852-152591001	NEB	NM_001164507	0.39681	1.76991e-05	22419.8	1			GO:0030832; GO:0030049; GO:0030018; GO:0030017; GO:0015629; GO:0008307; GO:0007525; GO:0007517; GO:0005829; GO:0005737; GO:0003779
chr17:41196311-41277500	BRCA1	NM_007300	18.9661	0.00114941	16500.7	1	ko04120		GO:2000620; GO:2000617; GO:2000145; GO:0085020; GO:0071681; GO:0071158; GO:0070531; GO:0070512; GO:0051865; GO:0051574; GO:0051573; GO:0051572; GO:0051571; GO:0050681; GO:0046872; GO:0046600; GO:0045944; GO:0045893; GO:0045892; GO:0045739; GO:0045717; GO:0044212; GO:0044030; GO:0043627; GO:0043234; GO:0043009; GO:0042981; GO:0042127; GO:0035067; GO:0035066; GO:0034446; GO:0033993; GO:0032355; GO:…
chr3:93698982-93774522	ARL13B	NM_182896	2.49319	0.00024496	10177.9	1			GO:0007264; GO:0005622; GO:0005525; GO:0000166
chr7:94536948-94925800	PPP1R9A	NM_001166160	2.42491	0.000243583	9955.17	1			GO:0045202; GO:0030154; GO:0030054; GO:0019717; GO:0007399; GO:0007275; GO:0005856; GO:0005737; GO:0003779
chr13:20532809-20665968	ZMYM2	NM_003453	3.23519	0.000348698	9277.91	1			GO:0046872; GO:0031624; GO:0016605; GO:0008270; GO:0008150; GO:0006355; GO:0005634
chr20:34700347-34820721	EPB41L1	NM_012156	30.601	0.00341072	8972.01	0.98439	ko04530		GO:0030866; GO:0019898; GO:0008092; GO:0007268; GO:0005886; GO:0005856; GO:0005829; GO:0005737; GO:0005488; GO:0005198; GO:0003779
chr17:4862520-4891034	CAMTA2	NM_001171167	8.57648	0.00129321	6631.93	0.997694			GO:0045944; GO:0042826; GO:0014898; GO:0008134; GO:0006357; GO:0005634; GO:0005516; GO:0005515; GO:0003682
chr2:159825118-160089170	TANC1	NM_033394	4.1592	0.0006361	6538.59	1			GO:0045211; GO:0045202; GO:0030054; GO:0014069; GO:0005886; GO:0005488
chr9:88902647-88969406	ZCCHC6	NM_024617	5.99705	0.000919484	6522.19	0.997694			GO:0071044; GO:0050265; GO:0046872; GO:0031123; GO:0016779; GO:0016740; GO:0008270; GO:0003676
chr15:42566236-42704515	CAPN3	NR_027912	0.35799	6.56846e-05	5450.14	1			GO:0051592; GO:0045214; GO:0042493; GO:0008234; GO:0008233; GO:0007517; GO:0007165; GO:0006508; GO:0005737; GO:0005634; GO:0005622; GO:0005509; GO:0004871; GO:0004198
chr16:84211460-84220672	TAF1C	NM_139353	40.6452	0.0104636	3884.44	0.96202			GO:0006366; GO:0006363; GO:0006362; GO:0006361; GO:0006360; GO:0006355; GO:0005654; GO:0005634; GO:0003677
chr21:46494492-46646478	ADARB1	NM_015834	0.706973	0.000199765	3539.02	1			GO:0046872; GO:0016787; GO:0016556; GO:0016553; GO:0006397; GO:0006396; GO:0006382; GO:0005654; GO:0005634; GO:0005622; GO:0004000; GO:0003729; GO:0003726; GO:0003725; GO:0003723
chr15:37183231-37393519	MEIS2	NM_170677	8.85522	0.00285223	3104.67	0.997694			GO:0043565; GO:0006366; GO:0006355; GO:0005634; GO:0003714; GO:0003700; GO:0000122
chr9:34652162-34661885	IL11RA	NM_004512	5.41028	0.00176892	3058.52	0.997694	ko04060; ko04640; ko04630		GO:0060322; GO:0032502; GO:0016020; GO:0007165; GO:0005887; GO:0004896; GO:0004888; GO:0004872; GO:0004871
chr7:143318044-143427173	FAM115C	NM_001130026	1.76498	0.00155819	1132.71	1
chr1:901837-911393	PLEKHN1	NM_032129	10.5344	0.0114605	919.192	0.978773
chr22:21321446-21335719	AIFM3	NM_144704	1.29783	0.0014557	891.55	1			GO:0051882; GO:0051537; GO:0050660; GO:0046872; GO:0045454; GO:0022900; GO:0016491; GO:0008656; GO:0008635; GO:0006917; GO:0006915; GO:0006810; GO:0005886; GO:0005829; GO:0005783; GO:0005743; GO:0005739; GO:0005737; GO:0005634
chr12:121570621-121624390	P2RX7	NR_033949	1.12845	0.00130834	862.505	1	ko04080; ko04020		GO:0051899; GO:0051709; GO:0051495; GO:0050718; GO:0046931; GO:0045919; GO:0045779; GO:0045087; GO:0043409; GO:0042981; GO:0042803; GO:0035590; GO:0033198; GO:0032060; GO:0032059; GO:0030501; GO:0019233; GO:0016020; GO:0010524; GO:0007166; GO:0006811; GO:0005887; GO:0005886; GO:0005737; GO:0005524; GO:0005216; GO:0005102; GO:0004931; GO:0004872; GO:0002218; GO:0002028; GO:0001614; GO:0001530
chr19:48711342-48759235	CARD8	NM_001184902	0.812941	0.00138414	587.326	1	ko04621		GO:0050718; GO:0043280; GO:0043124; GO:0042981; GO:0042803; GO:0032089; GO:0008656; GO:0006919; GO:0005737; GO:0005634; GO:0005622; GO:0005515
chr3:37034840-37092337	MLH1	NM_000249	10.1745	0.028998	350.869	0.947983	ko05210; ko05200; ko05213; ko03430		GO:0071407; GO:0051257; GO:0048477; GO:0045950; GO:0045190; GO:0043060; GO:0042493; GO:0032407; GO:0032390; GO:0032389; GO:0032137; GO:0030983; GO:0016887; GO:0016446; GO:0009636; GO:0008630; GO:0007283; GO:0007131; GO:0007060; GO:0007049; GO:0006303; GO:0006298; GO:0006200; GO:0005712; GO:0005634; GO:0005524; GO:0005515; GO:0003697; GO:0001673; GO:0001666; GO:0000795; GO:0000712; GO:0000289; GO:…
chr19:10444376-10450345	ICAM3	NM_002162	0.188743	0.000856368	220.399	1	ko04514		GO:0050776; GO:0016337; GO:0005887; GO:0005886; GO:0005515; GO:0005178; GO:0005102
chr2:236402735-237040138	AGAP1	NM_014914	3.58342	0.0261168	137.207	1	ko04144		GO:0046872; GO:0032312; GO:0015031; GO:0008270; GO:0008060; GO:0007264; GO:0005737; GO:0005622; GO:0005525; GO:0000166
chr14:103851700-103970168	MARK3	NM_001128918	0.223054	0.0022658	98.4438	1			GO:0016772; GO:0005886; GO:0005524; GO:0005515; GO:0004674; GO:0000166
chr10:27035171-27150016	ABI1	NM_005470	14.6133	0.329739	44.3178	0.0362831			GO:0045202; GO:0030426; GO:0030296; GO:0030175; GO:0030054; GO:0030027; GO:0019717; GO:0018108; GO:0008285; GO:0008154; GO:0008092; GO:0007169; GO:0006928; GO:0005856; GO:0005829; GO:0005783; GO:0005737; GO:0005634; GO:0005625; GO:0005622; GO:0005515; GO:0001756
chr6:71123106-71270877	FAM135A	NM_001105531	0.00419983	0.000151678	27.6891	1
chr19:35606731-35615228	FXYD3	NM_001136007	26.6267	1.04868	25.3907	0.0304971			GO:0051117; GO:0050790; GO:0034707; GO:0016020; GO:0006821; GO:0006811; GO:0005887; GO:0005792; GO:0005789; GO:0005254; GO:0005216
chr10:34601187-35104333	PARD3	NM_019619	0.0251159	0.00120329	20.8727	1	ko04062; ko04144; ko04530; ko04080; ko04520		GO:0090162; GO:0070830; GO:0045216; GO:0045177; GO:0043234; GO:0043220; GO:0043219; GO:0034329; GO:0032266; GO:0012505; GO:0008356; GO:0008289; GO:0007409; GO:0007205; GO:0007163; GO:0007049; GO:0006612; GO:0006461; GO:0005938; GO:0005923; GO:0005913; GO:0005911; GO:0005886; GO:0005856; GO:0005829; GO:0005819; GO:0005737; GO:0005547; GO:0005546; GO:0005515; GO:0005080
chr11:85368607-85376182	CREBZF	NR_028026	17.6371	0.920806	19.154	0.00484216			GO:0051090; GO:0046983; GO:0045892; GO:0045814; GO:0043565; GO:0009615; GO:0006351; GO:0005634; GO:0005515; GO:0003677
chrX:147582138-148082193	AFF2	NM_002025	0.0368153	0.00276318	13.3235	1			GO:0043484; GO:0016607; GO:0007611; GO:0007420; GO:0006397; GO:0005634; GO:0002151
chr8:143781480-143782045	LY6K	NM_001160354	13.4898	1.19245	11.3127	0.871587			GO:0031225; GO:0005886; GO:0005737; GO:0005730; GO:0005634; GO:0005576
chr15:89055707-89090001	DET1	NM_017996	0.0276245	0.00244878	11.2809	1	ko04120		GO:0005634
chr18:46446222-46475703	SMAD7	NM_005904	20.4499	2.07133	9.87284	0.0245412	ko04144; ko04350		GO:0070411; GO:0060412; GO:0060394; GO:0060389; GO:0060373; GO:0055117; GO:0055010; GO:0051444; GO:0050821; GO:0048844; GO:0048185; GO:0045768; GO:0044212; GO:0043433; GO:0035556; GO:0034713; GO:0034629; GO:0034616; GO:0034333; GO:0033137; GO:0032925; GO:0032436; GO:0031625; GO:0031398; GO:0031397; GO:0030617; GO:0030514; GO:0030512; GO:0030509; GO:0030336; GO:0022409; GO:0017015; GO:0016342; GO:…
chr1:6326384-6327622	UNQ6193	XR_109863	8.15568	0.834767	9.77001	0.677325
chr3:111393512-111695364	PHLDB2	NM_001134438	25.4097	2.82168	9.00517	0.000361154			GO:0045111; GO:0005886; GO:0005737
chr4:54243763-54326181	FIP1L1	NM_030917	46.0611	5.4131	8.50919	0.00785707			GO:0006397; GO:0005847; GO:0005730; GO:0005634; GO:0003723
chr3:184062279-184079936	CLCN2	NM_004366	18.5061	2.21267	8.3637	0.00998566			GO:0060689; GO:0060041; GO:0055085; GO:0044070; GO:0043204; GO:0034707; GO:0030425; GO:0030324; GO:0016021; GO:0016020; GO:0006811; GO:0006810; GO:0005247; GO:0005244
chr17:15933400-16118874	NCOR1	NM_006311	3.88454	0.500922	7.75478	1			GO:2000191; GO:0072368; GO:0072362; GO:0060318; GO:0051225; GO:0050790; GO:0048471; GO:0046966; GO:0046965; GO:0046329; GO:0044428; GO:0044255; GO:0044212; GO:0043565; GO:0042826; GO:0042632; GO:0040014; GO:0035033; GO:0032922; GO:0031065; GO:0021794; GO:0021549; GO:0017053; GO:0016580; GO:0016568; GO:0014067; GO:0006366; GO:0005876; GO:0005737; GO:0005667; GO:0005654; GO:0005634; GO:0005515; GO:…
chr22:31725009-31726174	MGC15705	XR_109708	3.23263	0.449042	7.19895	1
chr19:36940087-36940456	ZNF566	NM_032838	18.6535	2.59115	7.19893	0.908455			GO:0046872; GO:0008270; GO:0006355; GO:0005634; GO:0005622; GO:0003677
chr19:36980413-36981942	LOC728752	NR_036504	4.35597	0.65163	6.68473	1
chr19:6464180-6481798	DENND1C	NM_024898	1.48231	0.246509	6.01321	1		DENN/MADD domain containing 1C	GO:0031410; GO:0030136; GO:0005829; GO:0005737; GO:0005085
chr4:54439799-54440259	LNX1	NM_001126328	29.3516	5.03655	5.82772	0.803199			GO:0051260; GO:0046872; GO:0042787; GO:0030165; GO:0016874; GO:0008270; GO:0005737; GO:0005515; GO:0004842
chr7:113726364-114333827	FOXP2	NR_033766	0.00125705	0.000224961	5.58786	1			GO:0060501; GO:0060013; GO:0051090; GO:0048745; GO:0048286; GO:0046982; GO:0046872; GO:0045892; GO:0043565; GO:0043010; GO:0042803; GO:0042297; GO:0040007; GO:0021987; GO:0021758; GO:0021757; GO:0021549; GO:0009791; GO:0009790; GO:0008301; GO:0008270; GO:0008134; GO:0007519; GO:0007389; GO:0005737; GO:0005730; GO:0005667; GO:0005634; GO:0005622; GO:0003705; GO:0003700; GO:0003690; GO:0003682; GO:…
chr14:65877309-66209962	LOC645431	NR_024334	1.44294	0.260582	5.53737	1
chr3:65339905-66024509	MAGI1	NM_015520	5.89345	1.11378	5.2914	0.239225	ko04530		GO:0051393; GO:0042995; GO:0008022; GO:0007166; GO:0007155; GO:0006461; GO:0005923; GO:0005911; GO:0005886; GO:0005737; GO:0005524; GO:0005515; GO:0000166
chr15:65736741-65810043	DPP8	NM_197960	14.649	2.84048	5.15723	0.0677239			GO:0016020; GO:0008239; GO:0008236; GO:0008233; GO:0006955; GO:0006508; GO:0005737; GO:0005730; GO:0005634; GO:0004177
chrX:51804922-51812368	MAGED4B	NM_030801	0.921552	0.179217	5.1421	1
chr19:36347809-36358048	KIRREL2	NM_032123	0.841627	0.163674	5.14209	1		kin of IRRE like 2 (Drosophila)	GO:0016021; GO:0016020; GO:0007155; GO:0005886
chr17:76000258-76105687	TNRC6C	NM_001142640	17.9741	3.53404	5.08599	0.00648107			GO:0031047; GO:0006417; GO:0003723; GO:0000166
chr20:30102240-30158139	HM13	NM_178580	39.5573	7.79462	5.07495	0.0460179			GO:0033619; GO:0016021; GO:0009986; GO:0008233; GO:0005886; GO:0005789; GO:0005783; GO:0005515; GO:0004190
chr14:76618254-76670337	C14orf118	NM_017972	0.0019184	0.000381204	5.03248	1
chr1:213123886-213164930	VASH2	NM_001136474	3.20098	0.657885	4.86556	1			GO:0045766; GO:0005737; GO:0001938
chr17:42385926-42396038	RUNDC3A	NM_001144825	3.40124	0.708695	4.7993	1			GO:0007264; GO:0005083
chr10:70103233-70167060	RUFY2	NM_017987	1.82508	0.384385	4.74805	1			GO:0046872; GO:0005730; GO:0005634
chr3:188817909-188868925	LOC100505861	XR_108531	4.90551	1.05999	4.62788	0.881086
chr11:117947726-117990558	TMPRSS4	NM_019894	2.95278	0.65254	4.52506	1			GO:0016021; GO:0016020; GO:0008233; GO:0006508; GO:0005044; GO:0004252
chr3:114056911-114790261	ZBTB20	NM_001164343	60.0398	13.33	4.50411	0.00616027			GO:0046872; GO:0008270; GO:0006355; GO:0005730; GO:0005634; GO:0005622; GO:0003677
chr4:53525618-53525807	LOC643783	XR_110056	240.557	53.9791	4.45648	0.871587
chr19:35988118-36004577	DMKN	NM_001126056	30.62	7.05854	4.33801	0.880674			GO:0005615; GO:0005576
chr2:220408744-220417139	TMEM198	NM_001005209	28.2529	6.63996	4.25498	0.048777			GO:0016021; GO:0016020
chr8:1882912-1886382	LOC100131395	XR_110093	1.0882	0.264531	4.1137	1
chr1:11821762-11838367	C1orf167	XM_003118845	1.88206	0.457511	4.11369	1
chr19:51728334-51739221	CD33	NM_001772	6.78007	1.64818	4.11367	0.905305	ko04640	CD33 molecule	GO:0009897; GO:0008285; GO:0007267; GO:0007165; GO:0007155; GO:0005887; GO:0005886; GO:0005529; GO:0004872
chr10:61788057-62149488	ANK3	NM_020987	0.22824	0.0560484	4.07219	1			GO:0045184; GO:0016323; GO:0007165; GO:0005856; GO:0005737; GO:0005515
chr2:20424582-20424904	SDC1	NM_002997	475.829	117.449	4.05137	0.107689	ko05144; ko04514; ko04512		GO:0060070; GO:0060009; GO:0055002; GO:0051592; GO:0051591; GO:0051384; GO:0048627; GO:0043234; GO:0042542; GO:0042476; GO:0042157; GO:0042060; GO:0009986; GO:0009636; GO:0008092; GO:0008022; GO:0006629; GO:0005925; GO:0005887; GO:0005886; GO:0005737; GO:0005576; GO:0005515; GO:0004465; GO:0001948; GO:0001931; GO:0001657
chr16:71660069-71670030	MARVELD3	NM_052858	46.4824	11.7514	3.95548	0.0459484			GO:0030054; GO:0016021; GO:0016020; GO:0005923
chr12:54104845-54121329	CALCOCO1	NM_020898	5.56858	1.46119	3.81099	0.833174			GO:0070016; GO:0045893; GO:0044212; GO:0043565; GO:0043231; GO:0030518; GO:0030374; GO:0016055; GO:0008022; GO:0008013; GO:0007165; GO:0006351; GO:0005737; GO:0005634; GO:0005515; GO:0003713; GO:0003712
chr1:231041986-231114620	TTC13	NM_024525	7.09376	1.86462	3.8044	0.679403			GO:0005488
chr17:73625550-73663269	RECQL5	NM_001003715	2.97265	0.785599	3.78393	1			GO:0031965; GO:0016787; GO:0008026; GO:0006310; GO:0006281; GO:0006259; GO:0005737; GO:0005730; GO:0005654; GO:0005634; GO:0005524; GO:0003678; GO:0003676; GO:0000166
chr5:88014057-88200153	MEF2C	NM_001193347	2.47684	0.661241	3.74574	1	ko04010		GO:2001016; GO:2001013; GO:2000987; GO:2000727; GO:2000111; GO:0090073; GO:0072160; GO:0072102; GO:0071560; GO:0071498; GO:0071374; GO:0071277; GO:0071222; GO:0061333; GO:0060045; GO:0060025; GO:0055012; GO:0051403; GO:0051149; GO:0051145; GO:0050853; GO:0048666; GO:0048643; GO:0048011; GO:0046982; GO:0045944; GO:0045893; GO:0045885; GO:0045669; GO:0045666; GO:0045663; GO:0045652; GO:0045087; GO:…
chr9:21511116-21512184	MIR31	NR_029505	152.529	40.9486	3.72489	0.048777
chr11:1605571-1606513	KRTAP5-1	NM_001005922	4.20756	1.16894	3.59947	1			GO:0045095
chr19:51913274-51921057	SIGLEC10	NM_033130	1.38088	0.399694	3.45484	1			GO:0016021; GO:0007155; GO:0005886; GO:0005576; GO:0005529
chr12:31477249-31478879	FLJ13224	NR_026806	3.11366	0.908283	3.42807	1
chr8:42704779-42751866	RNF170	NM_001160223	8.75151	2.5529	3.42807	0.600736			GO:0046872; GO:0016021; GO:0016020; GO:0008270
chr16:69140054-69151595	HAS3	NM_005329	282.114	82.9034	3.40292	0.00103275			GO:0050501; GO:0030213; GO:0016021; GO:0016020; GO:0005975; GO:0005887
chr13:114526343-114526548	GAS6	NM_001143946	3280.36	967.817	3.38944	0.103769			GO:0070374; GO:0050900; GO:0048146; GO:0048018; GO:0044267; GO:0043687; GO:0040008; GO:0031093; GO:0030168; GO:0017187; GO:0008283; GO:0007596; GO:0007165; GO:0006508; GO:0005796; GO:0005788; GO:0005615; GO:0005576; GO:0005509; GO:0005102; GO:0002576
chr20:60718798-60750664	SS18L1	NM_198935	139.985	41.6329	3.36236	0.0286717			GO:0045893; GO:0016568; GO:0016358; GO:0005694; GO:0005634; GO:0000780; GO:0000777
chr3:114033703-114037894	MIR568	NR_030293	98.3971	29.6894	3.31422	0.0161682
chr3:49306029-49377536	USP4	NM_003363	23.7747	7.26108	3.27426	0.0888588			GO:0034394; GO:0031685; GO:0031647; GO:0031397; GO:0016579; GO:0008234; GO:0008233; GO:0006511; GO:0006508; GO:0005764; GO:0005737; GO:0005634; GO:0005515; GO:0004843; GO:0004221
chr1:205416462-205417438	MIR135B	NR_029893	10.9185	3.35265	3.25668	0.868507
chrX:10437304-10851809	MID1	NM_000381	28.2721	8.92807	3.16665	0.342625	ko04120		GO:0046872; GO:0032874; GO:0031625; GO:0016874; GO:0008270; GO:0007389; GO:0007026; GO:0005881; GO:0005875; GO:0005819; GO:0005737; GO:0005622; GO:0000226
chr11:10326517-10328943	ADM	NM_001124	358.132	113.56	3.15368	0.00842187	ko04270		GO:0060712; GO:0060670; GO:0055074; GO:0051384; GO:0048589; GO:0046879; GO:0045909; GO:0045906; GO:0045768; GO:0042594; GO:0042475; GO:0032868; GO:0032496; GO:0031700; GO:0031623; GO:0031102; GO:0031100; GO:0030819; GO:0019933; GO:0010460; GO:0010033; GO:0009611; GO:0009409; GO:0008285; GO:0008284; GO:0008209; GO:0008015; GO:0007568; GO:0007565; GO:0007507; GO:0007267; GO:0007204; GO:0007165; GO:…
chr3:13610239-13679922	FBLN2	NM_001165035	0.314661	0.101988	3.08527	1			GO:0005578; GO:0005576; GO:0005509; GO:0005201
chr15:72668453-72671129	C15orf34	NR_027262	0.539071	0.174724	3.08527	1
chr1:54703715-54704736	C1orf191	XR_110512	1.62918	0.528051	3.08527	1			GO:0005576
chr12:94853778-94856346	LOC144486	NR_027035	1.12737	0.365404	3.08527	1
chr2:87011727-87035519	CD8A	NM_001145873	1.45965	0.473103	3.08527	1	ko04660; ko04514; ko05340; ko04640; ko04612		GO:0051607; GO:0050850; GO:0050776; GO:0045065; GO:0042803; GO:0042288; GO:0042110; GO:0042101; GO:0019901; GO:0019882; GO:0015026; GO:0009897; GO:0007169; GO:0007166; GO:0006955; GO:0005887; GO:0005886; GO:0005576; GO:0005515; GO:0002456
chr9:97488885-97849500	C9orf3	NM_001193329	15.5774	5.04897	3.08526	0.33005			GO:0046872; GO:0019370; GO:0008270; GO:0008237; GO:0008233; GO:0006508; GO:0005737; GO:0005488; GO:0004177
chr22:47511733-47513111	UNQ6126	XR_109738	1.13436	0.367671	3.08526	1			GO:0005576
chr10:5042102-5060207	AKR1C2	NM_001354	1.19968	0.388843	3.08526	1	ko00140; ko00980		GO:0047115; GO:0047026; GO:0032052; GO:0031406; GO:0016491; GO:0008202; GO:0007586; GO:0006693; GO:0005737
chr15:73043707-73076126	ADPGK	NM_031284	25.1385	8.17106	3.07653	0.350694	ko00010		GO:0046872; GO:0043843; GO:0016740; GO:0006096; GO:0005975; GO:0005576
chr19:46272974-46296060	DMPK	NM_004409	1.99151	0.65363	3.04685	1			GO:0046872; GO:0033017; GO:0031965; GO:0031307; GO:0017020; GO:0016021; GO:0014853; GO:0010830; GO:0010657; GO:0008016; GO:0006998; GO:0006874; GO:0006468; GO:0005886; GO:0005829; GO:0005789; GO:0005741; GO:0005739; GO:0005737; GO:0005640; GO:0005634; GO:0005524; GO:0005515; GO:0004674; GO:0002028; GO:0000166
chr8:21915375-21940039	EPB49	NM_001978	109.839	36.0565	3.0463	0.0812165			GO:0051693; GO:0051017; GO:0030863; GO:0016020; GO:0015629; GO:0007010; GO:0005737; GO:0005634; GO:0003779
chr1:41154751-41237275	LOC100130557	NR_024567	2.4155	0.805049	3.00044	1
chr6:45389913-45518819	RUNX2	NM_001024630	5.48187	1.82973	2.996	0.507773			GO:0045893; GO:0045892; GO:0006355; GO:0005730; GO:0005634; GO:0005524; GO:0005515; GO:0003700; GO:0003677; GO:0001649; GO:0001503; GO:0000790
chr7:66368365-66371252	LOC644794	XR_108826	19.2057	6.60062	2.90968	0.370939
chr10:33466418-33623833	NRP1	NM_003873	26.0014	9.07389	2.86552	0.165469	ko04360		GO:0071526; GO:0060666; GO:0060627; GO:0060301; GO:0050731; GO:0048843; GO:0048485; GO:0048012; GO:0048010; GO:0048008; GO:0046872; GO:0043235; GO:0043025; GO:0035767; GO:0035729; GO:0031410; GO:0030426; GO:0030424; GO:0030154; GO:0021636; GO:0019955; GO:0019838; GO:0017154; GO:0016477; GO:0016358; GO:0016021; GO:0016020; GO:0015026; GO:0014911; GO:0010595; GO:0009986; GO:0009887; GO:0009611; GO:…
chr17:42248073-42256604	ASB16	NM_080863	35.4851	12.4356	2.85351	0.263663			GO:0035556; GO:0005515
chr1:228108160-228135676	WNT9A	NM_003395	38.5357	13.5488	2.84421	0.290743			GO:0072498; GO:0071300; GO:0061303; GO:0061072; GO:0060070; GO:0048704; GO:0045880; GO:0035117; GO:0032331; GO:0031575; GO:0030182; GO:0009952; GO:0009798; GO:0008285; GO:0007492; GO:0007275; GO:0007267; GO:0005886; GO:0005615; GO:0005578; GO:0005576; GO:0005201; GO:0001664
chr1:28473676-28520447	PTAFR	NM_001164721	9.96323	3.51319	2.83595	0.465873	ko04080; ko04020; ko05150		GO:0060333; GO:0048015; GO:0043231; GO:0032959; GO:0032496; GO:0019221; GO:0016021; GO:0016020; GO:0007186; GO:0006955; GO:0006954; GO:0006935; GO:0005887; GO:0005886; GO:0005730; GO:0005634; GO:0005543; GO:0004992; GO:0004930; GO:0004872; GO:0004871; GO:0002221; GO:0001816; GO:0001530
chr3:52321835-52329272	GLYCTK	NR_026701	6.861	2.42288	2.83175	0.800358	ko00561; ko00260; ko00680; ko00630		GO:0016740; GO:0008887; GO:0006468; GO:0005794; GO:0005739; GO:0005737; GO:0005524; GO:0005515; GO:0000166
chrX:133903595-133931262	FAM122B	NM_001166600	0.0223626	0.00789776	2.83151	1
chr19:49792888-49813301	SLC6A16	NM_014037	6.60918	2.35639	2.80479	0.844483			GO:0016021; GO:0016020; GO:0015293; GO:0006836; GO:0005622; GO:0005328; GO:0005326
chr17:43003156-43025082	KIF18B	NM_001080443	186.303	66.9012	2.78475	0.0311878		kinesin family member 18B	GO:0051302; GO:0007067; GO:0007018; GO:0005886; GO:0005874; GO:0005856; GO:0005737; GO:0005730; GO:0005634; GO:0005524; GO:0003777; GO:0000278; GO:0000166
chr13:111767623-111958081	ARHGEF7	NM_001113511	1.23249	0.443649	2.77807	1	ko04810		GO:0051056; GO:0048011; GO:0043065; GO:0042059; GO:0035023; GO:0008624; GO:0007399; GO:0007264; GO:0007173; GO:0007165; GO:0006915; GO:0005829; GO:0005515; GO:0005089; GO:0005085
chr1:23345899-23410184	KDM1A	NM_001009999	391.205	141.58	2.76314	0.010867			GO:0055114; GO:0055001; GO:0051577; GO:0051091; GO:0050681; GO:0050660; GO:0045944; GO:0045892; GO:0044212; GO:0043518; GO:0043433; GO:0043392; GO:0043066; GO:0034720; GO:0034648; GO:0033169; GO:0032454; GO:0032453; GO:0032452; GO:0032451; GO:0032091; GO:0030374; GO:0019899; GO:0016568; GO:0016491; GO:0008134; GO:0007596; GO:0007275; GO:0006482; GO:0005667; GO:0005654; GO:0005634; GO:0005515; GO:…
chr16:31085733-31096586	ZNF646	NM_014699	32.7338	11.9373	2.74214	0.186976			GO:0046872; GO:0008270; GO:0006355; GO:0005634; GO:0005622; GO:0005515; GO:0003677
chr19:34287750-34306666	KCTD15	NM_024076	44.5727	16.7329	2.66378	0.163249			GO:0016020; GO:0008076; GO:0006813; GO:0005249
chr1:29213586-29450451	TMEM200B	NM_001171868	7.74993	2.95351	2.62397	0.786893			GO:0016021; GO:0016020
chr3:24158643-24536313	THRB	NM_001128177	6.20891	2.36758	2.62247	0.511317	ko04080		GO:0046872; GO:0043565; GO:0019899; GO:0010467; GO:0008270; GO:0006355; GO:0006351; GO:0005654; GO:0005634; GO:0005515; GO:0004887; GO:0004872; GO:0003714; GO:0003707; GO:0003700; GO:0003677
chr8:144821488-144828507	hCG_1995004	NR_033849	75.8744	29.0053	2.61588	0.17079
chr1:14026709-14151574	PRDM2	NM_012231	18.8751	7.256	2.60131	0.352539			GO:0046872; GO:0032355; GO:0018024; GO:0016740; GO:0008270; GO:0008168; GO:0006355; GO:0005794; GO:0005634; GO:0005622; GO:0003700; GO:0003677
chr17:30477375-30478590	ARGFXP2	NR_002222	2.19499	0.853731	2.57106	1
chr7:99257841-99277621	CYP3A5	NR_033808	1.84081	0.715977	2.57105	1	ko00982; ko00983; ko00591; ko00140; ko00627; ko00980; ko00830		GO:0070989; GO:0070330; GO:0046872; GO:0042737; GO:0020037; GO:0019825; GO:0016491; GO:0016020; GO:0009822; GO:0009055; GO:0008202; GO:0006805; GO:0005792; GO:0005789; GO:0005783; GO:0004497
chr12:26126687-26232825	RASSF8	NM_001164747	3.20351	1.25626	2.55004	1			GO:0007165
chr15:101420008-101452561	ALDH1A3	NM_000693	753.325	299.384	2.51625	0.0220238	ko00982; ko00010; ko00350; ko00340; ko00360; ko00980	aldehyde dehydrogenase 1 family, member A3	GO:0070403; GO:0070324; GO:0060324; GO:0060166; GO:0048048; GO:0043065; GO:0042803; GO:0042574; GO:0042573; GO:0042493; GO:0031076; GO:0021983; GO:0021768; GO:0016491; GO:0005737; GO:0004030; GO:0004029; GO:0002138; GO:0002072; GO:0001822
chr19:36024313-36036920	GAPDHS	NM_014364	0.930656	0.374037	2.48814	1	ko00010	glyceraldehyde-3-phosphate dehydrogenase, spermatogenic	GO:0051287; GO:0050661; GO:0045821; GO:0030317; GO:0016491; GO:0009434; GO:0007286; GO:0006096; GO:0006094; GO:0006006; GO:0005975; GO:0005829; GO:0005737; GO:0005515; GO:0004365
chr17:27071013-27077976	TRAF4	NM_004295	37.8898	15.2904	2.47801	0.436258	ko05222; ko05200	TNF receptor-associated factor 4	GO:0090073; GO:0050699; GO:0048471; GO:0046872; GO:0046330; GO:0045860; GO:0042981; GO:0030323; GO:0030054; GO:0019901; GO:0008270; GO:0007585; GO:0007275; GO:0007165; GO:0005923; GO:0005886; GO:0005856; GO:0005737; GO:0005634; GO:0005515; GO:0004842; GO:0003677
chr11:71639767-71713574	IL18BP	NM_001039659	5.97211	2.41074	2.47729	0.898666			GO:0071356; GO:0070301; GO:0048019; GO:0042088; GO:0042007; GO:0032496; GO:0009968; GO:0005615; GO:0005576
chr1:149900542-149908791	MTMR11	NM_001145862	11.697	4.74881	2.46314	0.821919			GO:0016791
chr19:3359538-3469154	NFIC	NM_205843	73.9777	30.2833	2.44285	0.0871665			GO:0045944; GO:0006366; GO:0006355; GO:0006260; GO:0005634; GO:0005622; GO:0003700; GO:0003677; GO:0000122
chr22:31892260-32016045	SFI1	NM_014775	39.0318	16.1716	2.4136	0.29968			GO:0019902; GO:0010923; GO:0005856; GO:0005829; GO:0005814; GO:0005737; GO:0005515; GO:0000278; GO:0000086
chr17:7155371-7166512	CLDN7	NM_001185022	1014.47	425.272	2.38546	0.0434748	ko05160; ko04670; ko04530; ko04514		GO:0042802; GO:0030054; GO:0016338; GO:0016328; GO:0016021; GO:0005923; GO:0005886; GO:0005515; GO:0005198
chr1:46859938-46879520	FAAH	NM_001441	38.238	16.0466	2.38293	0.491597			GO:0047372; GO:0042803; GO:0031090; GO:0017064; GO:0016884; GO:0016788; GO:0016021; GO:0012505; GO:0009062; GO:0005856; GO:0005737; GO:0005543; GO:0004040
chr12:133757994-133783706	ZNF268	NM_152943	10.0518	4.23284	2.37472	0.572737			GO:0046872; GO:0008270; GO:0006355; GO:0005634; GO:0005622; GO:0003700; GO:0003677
chr8:23286596-23315441	ENTPD4	NM_001128930	42.276	17.8852	2.36374	0.299005	ko00230; ko04142; ko00240		GO:0045134; GO:0043231; GO:0031410; GO:0030173; GO:0016787; GO:0016021; GO:0016020; GO:0006256; GO:0005794; GO:0005737; GO:0000421; GO:0000139
chr16:2510100-2514964	C16orf59	NM_025108	31.6849	13.4663	2.3529	0.699309
chr7:116139360-116141178	CAV2	NM_001233	534.754	228.266	2.34268	0.0816567	ko04144; ko05100; ko04510		GO:0070836; GO:0060161; GO:0051259; GO:0051219; GO:0048741; GO:0048471; GO:0048278; GO:0045121; GO:0043234; GO:0042803; GO:0031748; GO:0031234; GO:0030133; GO:0019905; GO:0016050; GO:0009986; GO:0008285; GO:0007268; GO:0007088; GO:0007029; GO:0007005; GO:0006906; GO:0005901; GO:0005887; GO:0005886; GO:0005829; GO:0005811; GO:0005794; GO:0005737; GO:0005634; GO:0005624; GO:0005622; GO:0005515; GO:…
chr1:160185504-160232568	LOC100505686	XR_108293	32.6509	14.0984	2.31593	0.493121
chr2:25015625-25142055	CENPO	NM_024322	58.3401	25.2908	2.30677	0.21564			GO:0051301; GO:0034080; GO:0007059; GO:0006334; GO:0005829; GO:0005694; GO:0005654; GO:0005634; GO:0000777; GO:0000278; GO:0000236; GO:0000087
chr16:68119278-68270136	NFATC3	NM_173165	33.0649	14.4496	2.28829	0.336589	ko04360; ko04310; ko04650; ko04660; ko04662; ko04370		GO:0071285; GO:0055001; GO:0051145; GO:0045944; GO:0045333; GO:0007507; GO:0006954; GO:0006366; GO:0006357; GO:0005886; GO:0005829; GO:0005737; GO:0005730; GO:0005634; GO:0003700; GO:0003682; GO:0003677; GO:0001569
chr5:852690-854336	LOC100129204	XM_003118530	13.5482	5.9881	2.26252	0.863324
chr8:128808092-128808312	MIR1204	NR_031609	121.957	53.9032	2.26252	0.939755
chrX:48432835-48436804	RBM3	NM_006743	681.743	304.22	2.24095	0.0674787			GO:0045727; GO:0043023; GO:0042995; GO:0035196; GO:0030425; GO:0015934; GO:0009409; GO:0006417; GO:0006396; GO:0005737; GO:0005634; GO:0003723; GO:0000166
chr3:46710484-46735194	ALS2CL	NM_001190707	10.9579	4.89445	2.23884	0.754977			GO:0042802; GO:0035023; GO:0007032; GO:0005737; GO:0005622; GO:0005096; GO:0005089
chr7:99690403-99698380	MCM7	NM_005916	1228.4	550.916	2.22974	0.0666367	ko04113; ko04111; ko03030; ko04110		GO:0042555; GO:0042325; GO:0016787; GO:0008283; GO:0006974; GO:0006271; GO:0006270; GO:0006268; GO:0006260; GO:0005654; GO:0005634; GO:0005524; GO:0005515; GO:0004003; GO:0003697; GO:0003677; GO:0000785; GO:0000278; GO:0000216; GO:0000166; GO:0000084; GO:0000082; GO:0000075
chr12:6898637-6929976	CD4	NM_000616	1.8696	0.839045	2.22825	1	ko04660; ko04514; ko05340; ko04640; ko04612		GO:0050863; GO:0050852; GO:0050850; GO:0050731; GO:0050690; GO:0045860; GO:0045234; GO:0045121; GO:0045086; GO:0045058; GO:0044419; GO:0042803; GO:0042289; GO:0042101; GO:0032507; GO:0031295; GO:0030260; GO:0030217; GO:0019901; GO:0019899; GO:0019059; GO:0016032; GO:0016021; GO:0015026; GO:0009897; GO:0008270; GO:0007169; GO:0007167; GO:0007166; GO:0007165; GO:0007155; GO:0006955; GO:0006948; GO:…
chr19:38229202-38270230	ZNF573	NM_152360	2.55383	1.14612	2.22824	1			GO:0046872; GO:0008270; GO:0006355; GO:0005634; GO:0005622; GO:0003677
chr17:26646097-26646396	TMEM97	NM_014573	983.408	443.657	2.2166	0.555609		transmembrane protein 97	GO:0042632; GO:0031965; GO:0016021; GO:0005886; GO:0005791; GO:0005764; GO:0005737; GO:0005634; GO:0005515; GO:0001558
chr11:5320215-5323381	OR51B4	NM_033179	52.0426	23.4793	2.21653	0.465873	ko04740		GO:0050911; GO:0050896; GO:0016021; GO:0007608; GO:0005886; GO:0004984; GO:0004930; GO:0004872; GO:0004871
chr4:146402918-146403182	SMAD1	NM_005900	175.868	79.3966	2.21506	0.875518	ko04350		GO:0071407; GO:0070411; GO:0070410; GO:0061036; GO:0050775; GO:0045944; GO:0045768; GO:0045669; GO:0042802; GO:0042592; GO:0042493; GO:0042060; GO:0031053; GO:0030902; GO:0030901; GO:0030618; GO:0030509; GO:0019901; GO:0016021; GO:0010628; GO:0010243; GO:0009880; GO:0008285; GO:0007276; GO:0007183; GO:0007179; GO:0007165; GO:0006954; GO:0006468; GO:0006355; GO:0005829; GO:0005737; GO:0005667; GO:…
chr2:11682850-11782912	GREB1	NM_014668	6.4801	2.94071	2.20358	0.693627		growth regulation by estrogen in breast cancer 1	GO:0016021; GO:0016020
chr1:29213586-29450451	TMEM200B	NM_001003682	7.15043	3.24728	2.20198	0.871587			GO:0016021; GO:0016020
chr11:2661767-2721228	KCNQ1OT1	NR_002728	1.89005	0.860564	2.19629	1
chr3:180704967-180707562	DNAJC19	NM_001190233	81.9521	37.4142	2.1904	0.636644			GO:0048806; GO:0031072; GO:0016021; GO:0016020; GO:0015031; GO:0007601; GO:0006626; GO:0006457; GO:0005743; GO:0005739
chr13:37582861-37633850	FAM48A	NM_001014286	31.7807	14.5622	2.18241	0.632011			GO:0070461; GO:0007369; GO:0007275; GO:0006914; GO:0005634; GO:0005515
chr5:176928904-176937600	DOK3	NM_001144875	4.11905	1.88791	2.1818	1			GO:0007265; GO:0005886; GO:0005737; GO:0005158
chr7:127949687-127983974	RBM28	NM_001166135	44.1356	20.3418	2.1697	0.567149			GO:0008380; GO:0006397; GO:0005794; GO:0005730; GO:0005681; GO:0005634; GO:0003723; GO:0000166
chr13:92000011-92006829	MIR17HG	NR_027349	3.95733	1.82778	2.1651	1
chr12:13043955-13067481	GPRC5A	NM_003979	659.858	305.628	2.15902	0.0825295			GO:0031410; GO:0030659; GO:0007186; GO:0007165; GO:0005887; GO:0005886; GO:0005794; GO:0004930; GO:0004872; GO:0004871
chr21:47608359-47648738	LSS	NM_001001438	134.072	62.2805	2.15271	0.308243	ko00100		GO:0016866; GO:0016125; GO:0016020; GO:0008202; GO:0006695; GO:0006694; GO:0005792; GO:0005789; GO:0005783; GO:0000250
chr12:13067810-13070956	MIR614	NR_030345	269.531	125.242	2.15208	0.135093
chr6:138743179-138820579	NHSL1	NM_001144060	22.5007	10.4863	2.14572	0.514365
chrX:13789061-13956831	GPM6B	NM_001001995	1.79738	0.838857	2.14265	1			GO:0030154; GO:0016021; GO:0016020; GO:0007399; GO:0007275; GO:0003674
chr7:55086537-55279162	EGFR	NM_005228	73.8354	34.6074	2.13351	0.156508	ko05215; ko04060; ko04810; ko04010; ko04540; ko04320; ko05214; ko05218; ko05200; ko05213; ko04510; ko04012; ko04013; ko04912; ko05160; ko04520; ko05212; ko04144; ko05219; ko04020; ko05223; ko05120		GO:0070435; GO:0070141; GO:0060571; GO:0051897; GO:0051205; GO:0051015; GO:0050999; GO:0050730; GO:0050679; GO:0048546; GO:0048471; GO:0048146; GO:0046982; GO:0046777; GO:0045740; GO:0045739; GO:0045429; GO:0045121; GO:0043406; GO:0043066; GO:0043006; GO:0042802; GO:0042327; GO:0042177; GO:0042059; GO:0035413; GO:0031965; GO:0031659; GO:0030335; GO:0030235; GO:0030139; GO:0030122; GO:0021795; GO:…
chr13:41506054-41593508	ELF1	NM_172373	104.043	48.8998	2.12768	0.301504			GO:0050860; GO:0045944; GO:0045893; GO:0043565; GO:0005737; GO:0005730; GO:0005634; GO:0005515; GO:0003700; GO:0001817
chr11:3696239-3847582	PGAP2	NR_027017	51.3515	24.143	2.12697	0.684572			GO:0042770; GO:0016021; GO:0016020; GO:0015031; GO:0008565; GO:0006916; GO:0006506; GO:0005794; GO:0005789; GO:0005783; GO:0005634; GO:0000139
chr4:3371723-3433904	RGS12	NM_198229	19.651	9.36664	2.09798	0.719162		regulator of G-protein signaling 12	GO:0045744; GO:0043547; GO:0030695; GO:0008277; GO:0005886; GO:0005737; GO:0005634; GO:0005096; GO:0005057; GO:0000794
chr19:13215713-13227563	TRMT1	NM_001136035	406.867	194.033	2.0969	0.16352			GO:0046872; GO:0016740; GO:0008270; GO:0008168; GO:0008033; GO:0004809; GO:0003723
chr16:2570362-2594077	CEMP1	NM_001048212	8.00731	3.83928	2.08563	0.907464			GO:0005737
chr22:40440801-40731812	TNRC6B	NM_001024843	22.387	10.7599	2.0806	0.342404			GO:0031047; GO:0006417; GO:0005737; GO:0003723; GO:0000932; GO:0000166
chr16:67927174-67966547	PSKH1	NM_006742	51.7881	24.9161	2.0785	0.516594			GO:0016607; GO:0006468; GO:0005886; GO:0005856; GO:0005815; GO:0005794; GO:0005789; GO:0005783; GO:0005737; GO:0005634; GO:0005575; GO:0005524; GO:0004674; GO:0000166
chr10:114709326-114927437	TCF7L2	NM_001146274	228.527	110.276	2.07232	0.150641	ko05217; ko05210; ko05215; ko05216; ko04520; ko05412; ko05200; ko04310; ko05221; ko05213; ko04916		GO:0090090; GO:0070369; GO:0070016; GO:0060070; GO:0051897; GO:0048699; GO:0048660; GO:0048625; GO:0046827; GO:0045944; GO:0045892; GO:0045444; GO:0045295; GO:0044334; GO:0044212; GO:0043570; GO:0043565; GO:0043433; GO:0042593; GO:0035257; GO:0032993; GO:0032350; GO:0032092; GO:0032024; GO:0031016; GO:0022008; GO:0019901; GO:0016605; GO:0010909; GO:0009749; GO:0008283; GO:0008134; GO:0008013; GO:…
chr9:71736056-71870124	TJP2	NM_004817	56.813	27.429	2.07127	0.444876	ko04530; ko05110		GO:0030054; GO:0006921; GO:0006915; GO:0005923; GO:0005912; GO:0005886; GO:0005737; GO:0005634; GO:0005515; GO:0004385
chr15:43825659-43882451	PPIP5K1	NM_001130858	58.3945	28.2732	2.06537	0.414857			GO:0052724; GO:0052723; GO:0033857; GO:0016740; GO:0016301; GO:0006020; GO:0005829; GO:0005737; GO:0005730; GO:0005634; GO:0005524; GO:0003993; GO:0000832; GO:0000827; GO:0000166
chr13:48985180-49018840	LPAR6	NM_005767	0.692639	0.336131	2.06062	1	ko04080		GO:0045028; GO:0016021; GO:0007186; GO:0005886; GO:0004930; GO:0004872; GO:0004871
chr7:120628750-120901972	C7orf58	NM_024913	1.25135	0.608382	2.05685	1		chromosome 7 open reading frame 58	GO:0005783
chr10:135368347-135383462	SYCE1	NM_130784	1.10052	0.535052	2.05685	1			GO:0051301; GO:0007128; GO:0007126; GO:0007049; GO:0005694; GO:0005634; GO:0000801
chr17:30505968-30507088	LOC100506596	XM_003118754	0.968913	0.471068	2.05684	1
chr16:90122973-90142338	PRDM7	NM_001098173	0.32484	0.157932	2.05683	1		PR domain containing 7	GO:0018024; GO:0016740; GO:0016568; GO:0008168; GO:0006355; GO:0005694; GO:0005634; GO:0005622; GO:0003676
chr9:34379016-34397849	C9orf24	NM_032596	1.09279	0.531297	2.05683	1			GO:0048471; GO:0043623; GO:0043014; GO:0005737
chr12:48733790-48745097	ZNF641	NM_152320	8.1493	3.99724	2.03873	0.871587			GO:0046872; GO:0008270; GO:0006355; GO:0005737; GO:0005730; GO:0005634; GO:0005622; GO:0003677
chr17:3713282-3749543	C17orf85	NM_001114118	50.7111	25.0083	2.02777	0.511191			GO:0000166
chr3:12525930-12574930	TSEN2	NM_001145394	4.952	2.44315	2.02689	0.935219			GO:0016787; GO:0006397; GO:0006388; GO:0005813; GO:0005737; GO:0005730; GO:0005634; GO:0004519; GO:0003676; GO:0000214; GO:0000213
chr6:132021608-132022541	OR2A4	NM_030908	32.2498	15.9751	2.01875	0.871587	ko04740	olfactory receptor, family 2, subfamily A, member 4	GO:0050896; GO:0016021; GO:0005886; GO:0004984; GO:0004930; GO:0004872; GO:0004871
chr20:44441254-44445596	UBE2C	NM_181801	462.34	231.188	1.99984	0.397838	ko04120		GO:0070979; GO:0070936; GO:0051488; GO:0051439; GO:0051437; GO:0051436; GO:0051301; GO:0048015; GO:0031536; GO:0031145; GO:0016881; GO:0016874; GO:0016567; GO:0010994; GO:0010458; GO:0008054; GO:0007094; GO:0007067; GO:0007051; GO:0007049; GO:0006511; GO:0005829; GO:0005680; GO:0005654; GO:0005524; GO:0005515; GO:0004842; GO:0000278; GO:0000166; GO:0000075
chr22:42229090-42303356	SREBF2	NM_004599	644.874	324.416	1.9878	0.179083			GO:0045944; GO:0043565; GO:0042493; GO:0035104; GO:0033993; GO:0032937; GO:0031410; GO:0030425; GO:0016021; GO:0016020; GO:0012507; GO:0010288; GO:0009725; GO:0008203; GO:0008202; GO:0008022; GO:0007568; GO:0007283; GO:0006629; GO:0005794; GO:0005792; GO:0005789; GO:0005783; GO:0005737; GO:0005634; GO:0005515; GO:0003700; GO:0003682; GO:0000247; GO:0000139
chr12:54674487-54680871	HNRNPA1	NM_031157	346.897	175.459	1.97708	0.188079	ko03040		GO:0071013; GO:0051170; GO:0051168; GO:0051028; GO:0044419; GO:0030530; GO:0030529; GO:0010467; GO:0008380; GO:0006810; GO:0006405; GO:0006397; GO:0005737; GO:0005730; GO:0005681; GO:0005654; GO:0005634; GO:0003727; GO:0003723; GO:0003697; GO:0000398; GO:0000380; GO:0000166
chr9:3525623-3526043	RFX3	NM_134428	47.0372	23.8511	1.97212	0.91085			GO:2000078; GO:0072560; GO:0060287; GO:0060285; GO:0050796; GO:0048469; GO:0045944; GO:0045893; GO:0045892; GO:0044212; GO:0042384; GO:0031018; GO:0030154; GO:0007275; GO:0006355; GO:0005667; GO:0005634; GO:0005515; GO:0003705; GO:0003700; GO:0003677; GO:0000790
chr9:79792319-80000107	VPS13A	NM_033305	13.1722	6.67993	1.97191	0.737037			GO:0035176; GO:0015031; GO:0008104; GO:0007626; GO:0007399; GO:0006895; GO:0005622; GO:0005515
chr17:7571719-7590863	TP53	NM_001126114	327.634	166.285	1.97032	0.24915	ko05215; ko04010; ko05214; ko05218; ko05200; ko05213; ko04722; ko05217; ko05210; ko05014; ko05160; ko05216; ko04210; ko05222; ko05016; ko05212; ko04310; ko05219; ko04115; ko05223; ko04110; ko05220		GO:2000379; GO:0090403; GO:0090399; GO:0090343; GO:0072332; GO:0071479; GO:0071456; GO:0071158; GO:0070245; GO:0070215; GO:0051726; GO:0051721; GO:0051276; GO:0051262; GO:0051097; GO:0051087; GO:0050790; GO:0050731; GO:0048147; GO:0047485; GO:0046982; GO:0046902; GO:0046872; GO:0046677; GO:0045944; GO:0045893; GO:0045892; GO:0044419; GO:0044212; GO:0043525; GO:0043234; GO:0043066; GO:0043065; GO:…
chr16:4674802-4740975	MGRN1	NM_001142290	148.254	75.7114	1.95815	0.334338	ko04120		GO:0046872; GO:0045744; GO:0043951; GO:0016874; GO:0016567; GO:0008333; GO:0008270; GO:0006513; GO:0005886; GO:0005829; GO:0005769; GO:0005737; GO:0005634; GO:0005515; GO:0004842
chr2:220492291-220506860	SLC4A3	NM_201574	36.5234	18.6593	1.95738	0.684572			GO:0055085; GO:0051453; GO:0034220; GO:0015701; GO:0015297; GO:0006811; GO:0006810; GO:0005887; GO:0005886; GO:0005624; GO:0005452; GO:0005215
chr16:90038987-90063028	AFG3L1	NR_003228	85.0753	43.5864	1.95188	0.572199		AFG3 ATPase family gene 3-like 1 (S. cerevisiae), pseudogene
chr9:124329398-124547809	DAB2IP	NM_138709	42.4089	21.7607	1.94888	0.564609			GO:0090090; GO:0071902; GO:0071901; GO:0071889; GO:0071364; GO:0071356; GO:0070059; GO:0051721; GO:0051056; GO:0050680; GO:0048147; GO:0046580; GO:0045944; GO:0043507; GO:0043407; GO:0043124; GO:0043065; GO:0042803; GO:0042059; GO:0035591; GO:0035414; GO:0034261; GO:0032320; GO:0032088; GO:0031435; GO:0031235; GO:0019901; GO:0010719; GO:0010633; GO:0009967; GO:0007257; GO:0005886; GO:0005737; GO:…
chr19:36266416-36279724	SNX26	NM_001172630	20.8483	10.7138	1.94593	0.794862			GO:0035091; GO:0015031; GO:0007165; GO:0005622; GO:0005515; GO:0005096
chr22:31321259-31365050	MORC2	NM_014941	51.0599	26.3947	1.93448	0.488765			GO:0046872; GO:0008270; GO:0005829; GO:0005737; GO:0005634; GO:0005524
chr13:114549497-114559674	GAS6	NM_000820	20.1406	10.4419	1.92883	0.620566			GO:0070374; GO:0050900; GO:0048146; GO:0048018; GO:0044267; GO:0043687; GO:0040008; GO:0031093; GO:0030168; GO:0017187; GO:0008283; GO:0007596; GO:0007165; GO:0006508; GO:0005796; GO:0005788; GO:0005615; GO:0005576; GO:0005509; GO:0005102; GO:0002576
chr3:53529030-53846492	CACNA1D	NM_000720	1.77936	0.922765	1.92829	1	ko04912; ko04010; ko05010; ko05412; ko04930; ko05414; ko04270; ko04020; ko04260; ko05410; ko04973		GO:0055085; GO:0051925; GO:0050796; GO:0016021; GO:0007411; GO:0006816; GO:0006811; GO:0006112; GO:0005891; GO:0005886; GO:0005245; GO:0005244
chr7:13930853-14031050	ETV1	NM_004956	4.43032	2.29987	1.92633	1			GO:0048935; GO:0043565; GO:0006366; GO:0006355; GO:0005634; GO:0005515; GO:0003700
chr17:26653554-26662524	IFT20	NM_174887	215.689	112.432	1.9184	0.367183			GO:0030030; GO:0005932; GO:0005929; GO:0005856; GO:0005814; GO:0005794; GO:0005737; GO:0005515
chr6:41513696-41570122	FOXP4	NM_001012426	57.8688	30.2323	1.91414	0.525355			GO:0051090; GO:0048617; GO:0046982; GO:0046872; GO:0043565; GO:0042803; GO:0009888; GO:0008301; GO:0008270; GO:0008134; GO:0007507; GO:0007389; GO:0005737; GO:0005667; GO:0005634; GO:0005622; GO:0003705; GO:0003700; GO:0003690; GO:0003682
chr10:131564954-131565450	MGMT	NM_002412	180.253	94.2636	1.91222	0.852457			GO:0071479; GO:0071407; GO:0060644; GO:0060548; GO:0051593; GO:0045739; GO:0045471; GO:0043281; GO:0042493; GO:0034599; GO:0032259; GO:0016740; GO:0009636; GO:0009008; GO:0008168; GO:0006307; GO:0006306; GO:0006281; GO:0006266; GO:0005654; GO:0005634; GO:0005509; GO:0003908; GO:0003677
chr15:80214714-80217196	C15orf37	NR_028330	10.1392	5.30866	1.90994	0.872038
chr3:178735010-178789656	ZMAT3	NM_152240	26.8257	14.0524	1.90898	0.61007	ko04115		GO:0046872; GO:0040008; GO:0015031; GO:0008270; GO:0006974; GO:0006917; GO:0006915; GO:0005730; GO:0005634; GO:0005622; GO:0003723
chr19:44270684-44285554	KCNN4	NM_002250	51.3537	26.939	1.9063	0.779134	ko04970; ko04974		GO:0050862; GO:0050714; GO:0046541; GO:0045332; GO:0030322; GO:0019903; GO:0016021; GO:0015269; GO:0008076; GO:0007268; GO:0006952; GO:0006884; GO:0006816; GO:0006813; GO:0006811; GO:0005886; GO:0005516; GO:0005216
chr5:149737201-149779871	TCOF1	NM_001135243	269.16	141.438	1.90302	0.264833			GO:0006810; GO:0005737; GO:0005730; GO:0005634; GO:0005515; GO:0005215; GO:0001501
chr17:33448630-33458243	FNDC8	NM_017559	48.3913	25.4876	1.89862	0.918582
chr20:5100231-5100615	PCNAAS	NR_028370	9077.37	4795.21	1.89301	0.251645
chr15:40987326-41024429	RAD51	NM_133487	64.5558	34.106	1.8928	0.750637	ko05212; ko05200; ko03440		GO:0051260; GO:0051106; GO:0048471; GO:0043142; GO:0042802; GO:0017111; GO:0016605; GO:0008094; GO:0008022; GO:0007131; GO:0007126; GO:0006312; GO:0006310; GO:0006302; GO:0006281; GO:0006268; GO:0005759; GO:0005739; GO:0005737; GO:0005654; GO:0005634; GO:0005524; GO:0005515; GO:0003697; GO:0003690; GO:0003684; GO:0000800; GO:0000794; GO:0000793; GO:0000730; GO:0000724; GO:0000166
chr17:42785975-42829633	DBF4B	NM_145663	31.4124	16.8262	1.86687	0.789591			GO:0046872; GO:0008270; GO:0007049; GO:0005634; GO:0003676
chr16:28996146-29002104	LAT	NM_001014989	17.5287	9.39176	1.86639	0.878757	ko04664; ko04650; ko04660; ko04666		GO:0050863; GO:0050852; GO:0045121; GO:0043303; GO:0042110; GO:0035556; GO:0030168; GO:0019901; GO:0019722; GO:0016021; GO:0007596; GO:0007265; GO:0007229; GO:0006955; GO:0005886; GO:0005622; GO:0005515; GO:0005070; GO:0001772
chr3:187930720-188608460	LPP	NM_001167672	22.3977	12.0077	1.86528	0.851566			GO:0046872; GO:0030054; GO:0008270; GO:0008150; GO:0007155; GO:0005925; GO:0005886; GO:0005737; GO:0005634; GO:0005515
chr1:242011465-242053256	EXO1	NM_130398	21.8251	11.7746	1.85357	0.868507	ko03430		GO:0051908; GO:0048256; GO:0046872; GO:0045190; GO:0045145; GO:0043566; GO:0035312; GO:0016446; GO:0008409; GO:0007126; GO:0006310; GO:0006298; GO:0006281; GO:0005634; GO:0005515; GO:0004527; GO:0004523; GO:0004519; GO:0003677; GO:0002455
chr7:156469024-156469727	RNF32	NM_030936	23.9802	12.9542	1.85115	0.916675			GO:0046872; GO:0016235; GO:0008270; GO:0005768; GO:0005737; GO:0005515
chr11:129769600-129875381	PRDM10	NM_020228	14.3222	7.75693	1.84637	0.850668			GO:0046872; GO:0008270; GO:0006355; GO:0005634; GO:0005622; GO:0003677
chr3:126290621-126373984	TXNRD3	NM_052883	17.3876	9.42609	1.84462	0.868507	ko00240		GO:0050661; GO:0050660; GO:0045454; GO:0030154; GO:0022900; GO:0016491; GO:0015035; GO:0009055; GO:0007283; GO:0007275; GO:0006810; GO:0005792; GO:0005783; GO:0005737; GO:0005634; GO:0004791
chr1:149824180-149824687	HIST2H3A	NM_001005464	72.9998	39.7501	1.83647	0.880674	ko05322	histone cluster 2, H3a
chr16:3077867-3081367	CCDC64B	NM_001103175	56.6908	30.881	1.83578	0.846038		coiled-coil domain containing 64B	GO:0017137
chr16:69363900-69364506	PDF	NM_022341	212.63	116.768	1.82096	0.85187		peptide deformylase (mitochondrial)	GO:0046872; GO:0042586; GO:0031365; GO:0018206; GO:0016787; GO:0008284; GO:0006412; GO:0005739; GO:0005506
chr1:183441505-183523328	SMG7	NM_201569	51.4923	28.3011	1.81945	0.659945			GO:0051721; GO:0045111; GO:0035303; GO:0016071; GO:0016070; GO:0006406; GO:0005829; GO:0005737; GO:0005634; GO:0005515; GO:0000184
chr14:68000007-68067017	PLEKHH1	NM_020715	23.873	13.1468	1.81588	0.792659		pleckstrin homology domain containing, family H (with MyTH4 domain) member 1	GO:0005856; GO:0005488
chr10:64973201-64974904	JMJD1C	NM_004241	93.0121	51.2695	1.81418	0.803845			GO:0046966; GO:0046872; GO:0016702; GO:0016568; GO:0016491; GO:0007596; GO:0006355; GO:0005654; GO:0005634; GO:0005622; GO:0005515
chr5:175953699-175957058	RNF44	NM_014901	109.365	60.2863	1.81409	0.617976			GO:0046872; GO:0008270
chr1:46713366-46744750	RAD54L	NM_003579	68.0123	37.5117	1.8131	0.684874	ko03440		GO:0051276; GO:0042493; GO:0016817; GO:0010212; GO:0007126; GO:0006310; GO:0006281; GO:0005634; GO:0005524; GO:0004386; GO:0003677; GO:0000724; GO:0000166
chr10:65224988-65226323	LOC84989	NR_027182	14.5217	8.01427	1.81198	0.907464
chr14:89029252-89080543	ZC3H14	NM_024824	3.49911	1.93426	1.80902	1			GO:0046872; GO:0016607; GO:0008270; GO:0005737; GO:0005634; GO:0005515; GO:0003723
chr1:29213586-29450451	EPB41	NM_203342	5.86522	3.24267	1.80876	0.878457	ko04530		GO:0043234; GO:0043231; GO:0032092; GO:0030866; GO:0030863; GO:0030507; GO:0030036; GO:0019898; GO:0014731; GO:0008091; GO:0008015; GO:0005938; GO:0005886; GO:0005794; GO:0005737; GO:0005634; GO:0005545; GO:0005515; GO:0005200; GO:0003779
chr6:80714321-80752260	TTK	NM_001166691	9.51773	5.28539	1.80076	0.903647	ko04111; ko04110		GO:0010862; GO:0008284; GO:0007094; GO:0007052; GO:0007051; GO:0005819; GO:0005524; GO:0004713; GO:0004712; GO:0004674; GO:0000166
chr15:40824082-40824749	MRPL42P5	NR_002208	6.69902	3.72222	1.79974	0.977825
chr16:48200821-48266182	ABCC11	NM_032583	0.684458	0.38031	1.79974	1			GO:0055085; GO:0042626; GO:0016887; GO:0016021; GO:0016020; GO:0005524; GO:0000166
chr4:17616229-17627197	MED28	NM_025205	129.726	72.0806	1.79974	0.658326			GO:0016020; GO:0006355; GO:0005737; GO:0005730; GO:0005634; GO:0005515; GO:0003779
chr9:131581960-131592085	C9orf114	NM_016390	27.0347	15.0281	1.79894	0.860658			GO:0008150; GO:0005575; GO:0003674
chr9:21994134-21994496	CDKN2A	NM_058195	480.83	267.553	1.79714	0.86661	ko05214; ko05218; ko05200; ko05212; ko04115; ko05219; ko05223; ko04110; ko05220		GO:2000774; GO:2000111; GO:0090399; GO:0090398; GO:0071158; GO:0070534; GO:0070215; GO:0055105; GO:0051444; GO:0051059; GO:0050821; GO:0048103; GO:0046825; GO:0045944; GO:0045893; GO:0045892; GO:0045736; GO:0043517; GO:0043234; GO:0042326; GO:0035986; GO:0035985; GO:0034393; GO:0033235; GO:0033088; GO:0032088; GO:0031648; GO:0031647; GO:0030889; GO:0030308; GO:0019901; GO:0016604; GO:0010389; GO:…
chr17:44107281-44270277	KIAA1267	NM_001193465	120.495	67.2696	1.79123	0.491597			GO:0071339; GO:0005634; GO:0005515
chr17:16245847-16252932	CENPV	NM_181716	194.112	108.742	1.78507	0.699369			GO:0051301; GO:0051233; GO:0034508; GO:0033044; GO:0032467; GO:0031508; GO:0016846; GO:0008152; GO:0007067; GO:0007049; GO:0005856; GO:0005737; GO:0005730; GO:0005694; GO:0005634; GO:0003674; GO:0000777; GO:0000776
chr6:116421966-116422187	NT5DC1	NM_152729	1835.21	1030.33	1.78119	0.868507			GO:0046872; GO:0016787
chr7:87563587-87827209	ADAM22	NM_016351	12.6473	7.10652	1.77968	0.871587			GO:0016021; GO:0016020; GO:0008270; GO:0007417; GO:0007162; GO:0006508; GO:0005515; GO:0005178; GO:0004872; GO:0004222
chr20:62289646-62339514	RTEL1	NM_032957	69.4897	39.1895	1.77317	0.658267			GO:0051536; GO:0046872; GO:0016818; GO:0010569; GO:0006281; GO:0006139; GO:0005634; GO:0005524; GO:0004386; GO:0004003; GO:0003677; GO:0000723; GO:0000166
chr13:111558168-111567416	ANKRD10	NM_017664	208.701	117.716	1.77292	0.846038
chr2:128461807-128568761	WDR33	NM_018383	67.1447	37.9044	1.77142	0.526447			GO:0007283; GO:0006301; GO:0005730; GO:0005634; GO:0005581
chr5:180631584-180632407	TRIM7	NM_203293	75.2189	42.491	1.77023	0.871587			GO:0046872; GO:0043231; GO:0008270; GO:0005737; GO:0005730; GO:0005634; GO:0005622
chr11:126152960-126164901	TIRAP	NM_001039661	44.7323	25.2932	1.76855	0.861982	ko04620		GO:2000343; GO:2000340; GO:0090073; GO:0090023; GO:0072568; GO:0071223; GO:0071221; GO:0070935; GO:0070374; GO:0051092; GO:0050830; GO:0046982; GO:0046330; GO:0045410; GO:0045088; GO:0045087; GO:0044130; GO:0043123; GO:0042803; GO:0035665; GO:0035663; GO:0035662; GO:0034145; GO:0034142; GO:0034141; GO:0034137; GO:0034134; GO:0034130; GO:0032760; GO:0032757; GO:0032738; GO:0032735; GO:0032648; GO:…
chr22:45705080-45724302	FAM118A	NM_001104595	39.5167	22.3865	1.7652	0.871587		family with sequence similarity 118, member A	GO:0016021; GO:0016020
chr19:15346645-15391330	BRD4	NM_058243	52.5262	29.7828	1.76364	0.638505		bromodomain containing 4	GO:0044419; GO:0044154; GO:0043983; GO:0043388; GO:0032968; GO:0010971; GO:0007059; GO:0006468; GO:0005737; GO:0005730; GO:0005634; GO:0005515; GO:0001833; GO:0000794; GO:0000790; GO:0000114
chr4:184018173-184020352	C4orf38	NR_024008	2.69851	1.53063	1.76301	1
chr19:1269266-1274809	CIRBP	NM_001280	94.7715	53.7732	1.76243	0.719162			GO:0070181; GO:0048255; GO:0045727; GO:0034063; GO:0030371; GO:0017148; GO:0010494; GO:0009411; GO:0009409; GO:0005737; GO:0005654; GO:0005634; GO:0005515; GO:0003730; GO:0003723; GO:0000166
chr3:51989329-52001527	PCBP4	NM_001174100	23.6084	13.4611	1.75382	0.889302			GO:0030529; GO:0008630; GO:0007050; GO:0006977; GO:0005737; GO:0005575; GO:0003723; GO:0003677
chr2:190611887-190612072	OSGEPL1	NM_022353	438.468	251.935	1.7404	0.943782		O-sialoglycoprotein endopeptidase-like 1	GO:0008033; GO:0006508; GO:0005739; GO:0004222
chr16:88941189-89007733	CBFA2T3	NM_005187	35.4831	20.407	1.73877	0.846038			GO:0046872; GO:0045944; GO:0030851; GO:0030154; GO:0016020; GO:0008283; GO:0008270; GO:0005794; GO:0005730; GO:0005654; GO:0005634; GO:0005622; GO:0005515; GO:0003700; GO:0003682; GO:0000139
chr1:26608772-26644756	UBXN11	NM_183008	63.23	36.3835	1.73788	0.832421		UBX domain protein 11	GO:0005856; GO:0005737
chr1:52838500-52870143	ORC1L	NM_004153	92.7061	53.5002	1.73282	0.738765			GO:0017111; GO:0006270; GO:0006260; GO:0005886; GO:0005829; GO:0005737; GO:0005730; GO:0005664; GO:0005654; GO:0005634; GO:0005524; GO:0005515; GO:0003677; GO:0000808; GO:0000278; GO:0000216; GO:0000166; GO:0000084; GO:0000083; GO:0000082; GO:0000075
chr17:3539761-3567179	CTNS	NM_001031681	116.218	67.2025	1.72937	0.564133	ko04142		GO:0050890; GO:0046034; GO:0016021; GO:0016020; GO:0015811; GO:0015184; GO:0007420; GO:0006810; GO:0006749; GO:0006520; GO:0005770; GO:0005769; GO:0005765; GO:0005764
chr8:94752338-94753047	C8orf39	NR_027259	41.2487	23.8946	1.72628	0.907464
chr10:73490351-73575704	CDH23	NM_022124	0.000561932	0.000326131	1.72303	1			GO:0060088; GO:0060013; GO:0051480; GO:0050957; GO:0050953; GO:0050896; GO:0048563; GO:0045494; GO:0045202; GO:0042491; GO:0042472; GO:0032426; GO:0032420; GO:0016339; GO:0016021; GO:0016020; GO:0008344; GO:0007605; GO:0007156; GO:0007155; GO:0006816; GO:0005932; GO:0005929; GO:0005886; GO:0005829; GO:0005515; GO:0005509; GO:0001917
chr16:29801939-29816722	KIF22	NM_007317	331.005	192.46	1.71986	0.495181			GO:0007596; GO:0007067; GO:0007018; GO:0006281; GO:0005925; GO:0005874; GO:0005856; GO:0005829; GO:0005819; GO:0005737; GO:0005634; GO:0005524; GO:0003777; GO:0003677; GO:0000785; GO:0000776; GO:0000166
chr22:50166936-50173958	BRD1	NM_014577	24.6328	14.3275	1.71927	0.871587		bromodomain containing 1	GO:0070776; GO:0046872; GO:0043966; GO:0016568; GO:0008270; GO:0005634
chr10:91342748-91405215	PANK1	NM_148977	20.382	11.8623	1.71822	0.871587	ko00770		GO:0016740; GO:0015939; GO:0015937; GO:0009108; GO:0006767; GO:0006766; GO:0005829; GO:0005737; GO:0005730; GO:0005634; GO:0005524; GO:0004594; GO:0000166
chr10:123237843-123357972	FGFR2	NM_022970	5.91402	3.44476	1.71682	0.939057	ko05200; ko05215; ko04144; ko04810; ko04010		GO:0090263; GO:0070374; GO:0070372; GO:0060916; GO:0060915; GO:0060688; GO:0060687; GO:0060670; GO:0060667; GO:0060664; GO:0060615; GO:0060601; GO:0060595; GO:0060529; GO:0060527; GO:0060523; GO:0060512; GO:0060501; GO:0060484; GO:0060463; GO:0060449; GO:0060445; GO:0060442; GO:0060349; GO:0060348; GO:0060174; GO:0060076; GO:0060045; GO:0055010; GO:0051781; GO:0051150; GO:0050679; GO:0048762; GO:…
chr2:239146907-239148681	HES6	NM_018645	139.088	81.0844	1.71535	0.830371			GO:0030154; GO:0008134; GO:0007399; GO:0007275; GO:0006357; GO:0006355; GO:0005667; GO:0005634; GO:0003712; GO:0003700; GO:0003677
chr12:122277432-122326517	HPD	NM_001171993	2.46859	1.44022	1.71404	1	ko00350; ko00360; ko00130		GO:0046872; GO:0034641; GO:0009072; GO:0006572; GO:0006559; GO:0005829; GO:0005794; GO:0005789; GO:0005783; GO:0003868; GO:0000139
chr17:5095347-5095457	LOC100130950	NR_034082	1330.05	775.978	1.71403	0.972006
chr5:134670070-134735577	H2AFY	NM_138610	145.684	85.0251	1.71342	0.818219	ko05322		GO:0016568; GO:0007549; GO:0006334; GO:0005634; GO:0003682; GO:0003677; GO:0001740; GO:0000793; GO:0000786
chr20:62492565-62495824	C20orf135	NM_080622	21.5214	12.5843	1.71018	0.871587		abhydrolase domain containing 16B	GO:0016787
chr16:69598996-69738553	NFAT5	NM_138714	65.4006	38.3114	1.70708	0.514365	ko04360; ko04310; ko04650; ko04660; ko04662; ko04370		GO:0007588; GO:0007165; GO:0006366; GO:0006355; GO:0005634; GO:0003700; GO:0003677
chr1:28298125-28415135	EYA3	NM_001990	55.5144	32.5595	1.70501	0.798159			GO:0046872; GO:0045739; GO:0035335; GO:0016787; GO:0016576; GO:0016568; GO:0010212; GO:0009653; GO:0008138; GO:0007601; GO:0007275; GO:0006355; GO:0006302; GO:0005737; GO:0005667; GO:0005634; GO:0005515; GO:0004725; GO:0003824; GO:0003682
chr15:65871115-65903643	C15orf44	NM_030800	162.448	95.4654	1.70164	0.705476
chr16:29392709-29415866	LOC728888	XM_002343430	77.0879	45.3386	1.70027	0.770893
chr1:41154751-41237275	NFYC	NM_001142588	44.1718	25.9843	1.69994	0.873672	ko04612		GO:0045893; GO:0043565; GO:0016602; GO:0006457; GO:0006357; GO:0006355; GO:0005634; GO:0005622; GO:0005515; GO:0003713; GO:0003700; GO:0003677
chr14:74432401-74486026	ENTPD5	NM_001249	25.4027	14.9851	1.6952	0.871587	ko00230; ko00240		GO:0051084; GO:0046034; GO:0045134; GO:0016787; GO:0016049; GO:0014066; GO:0008283; GO:0008152; GO:0006487; GO:0006096; GO:0005788; GO:0005783; GO:0004382
chr2:25015625-25142055	ADCY3	NM_004036	98.5708	58.2456	1.69233	0.653038	ko04970; ko04740; ko04540; ko04962; ko04062; ko00230; ko04916; ko04114; ko04912; ko04914; ko05110; ko04971; ko04972; ko05414; ko04270; ko04020	adenylate cyclase 3	GO:0071377; GO:0055085; GO:0050896; GO:0048011; GO:0046872; GO:0045121; GO:0035556; GO:0034199; GO:0008294; GO:0007608; GO:0007268; GO:0007202; GO:0007193; GO:0007189; GO:0007165; GO:0007143; GO:0006833; GO:0006184; GO:0006171; GO:0006112; GO:0005887; GO:0005886; GO:0005737; GO:0005634; GO:0005624; GO:0005524; GO:0005516; GO:0004016; GO:0003924; GO:0000166
chr22:20067732-20100761	DGCR8	NM_001190326	93.2314	55.3188	1.68535	0.640079			GO:0046872; GO:0031053; GO:0015630; GO:0005737; GO:0005730; GO:0005654; GO:0005634; GO:0005622; GO:0005515; GO:0004525; GO:0003725
chr15:76196731-76197041	FBXO22	NM_012170	290.139	172.407	1.68287	0.895019			GO:2000060; GO:0032436; GO:0016567; GO:0010830; GO:0009267; GO:0006913; GO:0006511; GO:0006464; GO:0005737; GO:0005634; GO:0004842; GO:0000209
chr1:11714431-11723384	FBXO44	NM_001014765	24.3393	14.4647	1.68267	0.877376			GO:0030163; GO:0019005; GO:0005515
chrX:45604907-45606288	MIR221	NR_029635	101.078	60.1445	1.68059	0.871587
chr9:139702373-139728794	C9orf86	NM_001173988	125.093	74.5211	1.67863	0.852721			GO:0007264; GO:0005813; GO:0005737; GO:0005634; GO:0005622; GO:0005525; GO:0005515; GO:0000166
chr4:146679309-146860215	ZNF827	NM_178835	59.9717	35.7605	1.67704	0.696917		zinc finger protein 827	GO:0046872; GO:0008270; GO:0006355; GO:0005634; GO:0005622; GO:0003677
chr15:63796703-63797027	USP3	NM_006537	540.667	322.445	1.67677	0.873515			GO:0046872; GO:0042393; GO:0031647; GO:0016578; GO:0016568; GO:0008270; GO:0008234; GO:0008233; GO:0006511; GO:0006508; GO:0006281; GO:0005634; GO:0004843; GO:0004221; GO:0000790; GO:0000278
chr17:16342300-16373962	NCRNA00188	NR_027176	3122.05	1870.36	1.66922	0.517628			GO:0005739
chr9:26947036-27036798	IFT74	NM_001099222	2.09819	1.25875	1.66688	1			GO:0030992; GO:0016023; GO:0009434; GO:0005813; GO:0005737
chr12:121866711-122018920	KDM2B	NM_032590	59.1913	35.5224	1.66631	0.80262			GO:2000178; GO:0051864; GO:0048596; GO:0046872; GO:0043524; GO:0035518; GO:0032452; GO:0031519; GO:0030902; GO:0030901; GO:0030900; GO:0021993; GO:0021678; GO:0021670; GO:0021592; GO:0021555; GO:0019843; GO:0016702; GO:0016577; GO:0016568; GO:0016491; GO:0008270; GO:0007283; GO:0006355; GO:0005730; GO:0005634; GO:0005515; GO:0003677; GO:0000122
chr4:972860-987224	SLC26A1	NM_213613	7.88685	4.74741	1.6613	0.957141			GO:0055085; GO:0034220; GO:0019531; GO:0016021; GO:0016020; GO:0015116; GO:0015108; GO:0008272; GO:0008271; GO:0006811; GO:0005886; GO:0005215
chr19:58193356-58201854	ZNF551	NM_138347	20.9294	12.6032	1.66064	0.871587			GO:0046872; GO:0008270; GO:0006355; GO:0005634; GO:0005622; GO:0003677
chr2:28615721-28639304	FOSL2	NM_005253	88.2048	53.2401	1.65674	0.69181			GO:0048146; GO:0046983; GO:0043565; GO:0008219; GO:0006357; GO:0005730; GO:0005634; GO:0003700
chr1:154192654-154243329	UBAP2L	NM_014847	202.215	122.137	1.65564	0.652851			GO:0007339; GO:0005671; GO:0005515
chr2:219264462-219270664	CTDSP1	NM_182642	198.67	120.605	1.64728	0.71054			GO:0050768; GO:0046872; GO:0045665; GO:0016787; GO:0008420; GO:0006470; GO:0006357; GO:0005634; GO:0005515; GO:0004721
chr15:96812000-96870590	LOC644192	XR_109225	3.60898	2.19327	1.64548	1
chr8:145674882-145691077	CYHR1	NM_138496	55.0812	33.5065	1.6439	0.871587			GO:0048471; GO:0046872; GO:0008270; GO:0005737; GO:0005635
chr16:639668-679273	RAB40C	NM_001172663	51.6006	31.4281	1.64186	0.871587			GO:0015031; GO:0007264; GO:0005886; GO:0005525; GO:0000166
chr4:2794749-2842823	SH3BP2	NM_001145855	35.516	21.6541	1.64015	0.803199	ko04650		GO:0017124; GO:0007165; GO:0005070
chr16:89653819-89663654	CPNE7	NM_014427	239.797	146.397	1.63799	0.684572			GO:0006810; GO:0006629; GO:0005215
chr11:57529233-57586652	CTNND1	NM_001085458	239.806	146.508	1.63681	0.579738	ko04670; ko04520		GO:0090090; GO:0060690; GO:0045296; GO:0045216; GO:0042153; GO:0034332; GO:0034329; GO:0030496; GO:0030216; GO:0030027; GO:0019904; GO:0019903; GO:0016337; GO:0016055; GO:0007435; GO:0007155; GO:0006355; GO:0005913; GO:0005911; GO:0005886; GO:0005829; GO:0005737; GO:0005634; GO:0005624; GO:0005515; GO:0005102; GO:0001738
chr11:61159831-61166323	TMEM216	NM_016499	102.557	62.6718	1.63641	0.871587			GO:0060271; GO:0016021; GO:0016020
chr12:133147655-133161774	FBRSL1	NM_001142641	109.878	67.5938	1.62556	0.801993
chr15:67000897-67074338	SMAD6	NR_027654	21.3777	13.1651	1.62382	0.913016	ko04144; ko04350		GO:0070698; GO:0070412; GO:0070411; GO:0070410; GO:0060394; GO:0045750; GO:0044212; GO:0043627; GO:0043154; GO:0043066; GO:0034713; GO:0034616; GO:0031625; GO:0031589; GO:0030617; GO:0030514; GO:0030512; GO:0030509; GO:0010991; GO:0007352; GO:0007179; GO:0006955; GO:0005829; GO:0005737; GO:0005667; GO:0005634; GO:0005622; GO:0005515; GO:0003700; GO:0003682; GO:0001657
chr17:18569235-18585572	ZNF286B	NM_001145045	46.042	28.4467	1.61854	0.818499			GO:0046872; GO:0008270; GO:0006355; GO:0005634; GO:0005622; GO:0003677
chrX:153770458-153793261	IKBKG	NM_001099857	82.4094	50.943	1.61768	0.871587	ko05215; ko04620; ko04010; ko04662; ko05200; ko05131; ko04062; ko04920; ko05142; ko04660; ko05145; ko05160; ko04622; ko04210; ko05222; ko05212; ko04623; ko05221; ko05340; ko05220; ko04621; ko05120		GO:0070423; GO:0051403; GO:0051092; GO:0050852; GO:0046872; GO:0045087; GO:0044444; GO:0044419; GO:0043123; GO:0034142; GO:0034138; GO:0034134; GO:0034130; GO:0019904; GO:0009615; GO:0008385; GO:0008063; GO:0007254; GO:0007250; GO:0007249; GO:0006974; GO:0006955; GO:0006954; GO:0006917; GO:0006355; GO:0005829; GO:0005737; GO:0005634; GO:0005515; GO:0004871; GO:0002756; GO:0002755; GO:0002224; GO:…
chr3:110866250-110919333	LOC100506575	XR_108463	23.7418	14.6963	1.6155	0.871587			GO:0060042; GO:0050839; GO:0045216; GO:0043296; GO:0042803; GO:0034332; GO:0034329; GO:0016021; GO:0009566; GO:0007156; GO:0005913; GO:0005886; GO:0005515; GO:0002089
chr21:46931889-46962386	SLC19A1	NM_194255	128.584	79.6519	1.61432	0.685266			GO:0051958; GO:0046655; GO:0015884; GO:0015350; GO:0008518; GO:0008517; GO:0006810; GO:0006767; GO:0006766; GO:0005887; GO:0005886; GO:0005624; GO:0005542
chr19:16940217-16965502	SIN3B	NM_015260	82.0889	50.8855	1.61321	0.873515			GO:0048738; GO:0045892; GO:0044255; GO:0030849; GO:0007519; GO:0005737; GO:0005654; GO:0005634; GO:0005515; GO:0003714; GO:0003682; GO:0001741; GO:0000806; GO:0000805
chr6:3259145-3259432	PSMG4	NM_001128592	628.633	389.859	1.61246	0.890517
chr7:104752172-104754429	MLL5	NM_018682	77.8818	48.3827	1.6097	0.871587			GO:0071300; GO:0070688; GO:0051568; GO:0048384; GO:0046872; GO:0045893; GO:0042800; GO:0042119; GO:0030854; GO:0030218; GO:0019899; GO:0016740; GO:0016607; GO:0016568; GO:0008270; GO:0008168; GO:0007050; GO:0007049; GO:0006306; GO:0005634; GO:0005515; GO:0003713; GO:0002446
chr3:100053469-100074609	NIT2	NM_020202	82.5249	51.3274	1.60781	0.871587	ko00524		GO:0050152; GO:0016810; GO:0008150; GO:0006807; GO:0005813; GO:0005739; GO:0005737; GO:0005575; GO:0003674
chr17:41561333-41604129	DHX8	NM_004941	100.867	62.8163	1.60575	0.711796	ko03040		GO:0071013; GO:0016787; GO:0008380; GO:0006396; GO:0005681; GO:0005634; GO:0005524; GO:0005515; GO:0004386; GO:0004004; GO:0003723; GO:0000398; GO:0000166
chr11:64532075-64546316	SF1	NM_201995	246.617	153.815	1.60334	0.692672			GO:0046872; GO:0008380; GO:0008270; GO:0008150; GO:0006355; GO:0005840; GO:0005730; GO:0005681; GO:0005634; GO:0003723; GO:0003714; GO:0003676; GO:0000398; GO:0000389; GO:0000245
chr20:3827437-3856825	MAVS	NM_020746	134.578	83.9462	1.60315	0.624708	ko04623; ko05160; ko04622		GO:0071660; GO:0071651; GO:0071360; GO:0060340; GO:0051091; GO:0050700; GO:0045944; GO:0045087; GO:0044419; GO:0043123; GO:0042993; GO:0042742; GO:0033160; GO:0032760; GO:0032757; GO:0032728; GO:0032727; GO:0032480; GO:0019901; GO:0016021; GO:0016020; GO:0009615; GO:0007165; GO:0005741; GO:0005739; GO:0005515; GO:0004871; GO:0002230; GO:0002218; GO:0001934
chr12:49159974-49182820	ADCY6	NM_015270	41.8616	26.125	1.60236	0.863462	ko04970; ko04912; ko04914; ko04540; ko04962; ko04972; ko04971; ko05414; ko04062; ko00230; ko04270; ko04916; ko04114; ko04742		GO:0071377; GO:0055085; GO:0048011; GO:0046872; GO:0045121; GO:0044424; GO:0042383; GO:0035556; GO:0034199; GO:0031528; GO:0016021; GO:0008294; GO:0007268; GO:0007202; GO:0007193; GO:0007189; GO:0006833; GO:0006184; GO:0006171; GO:0006112; GO:0005929; GO:0005886; GO:0005768; GO:0005624; GO:0005524; GO:0005515; GO:0005102; GO:0004016; GO:0003924; GO:0000166
chr4:154228620-154229963	ANXA2P1	NR_001562	1012.12	632.475	1.60025	0.647255
chr9:131768514-131769566	NUP188	NM_015354	314.99	196.898	1.59976	0.852838	ko03013		GO:0055085; GO:0051028; GO:0016032; GO:0015758; GO:0015031; GO:0010827; GO:0008645; GO:0005975; GO:0005643; GO:0005635; GO:0005634
chrX:54466813-54522599	TSR2	NM_058163	115.163	72.1241	1.59673	0.850101			GO:0006364; GO:0005515
chr17:38218445-38257056	NR1D1	NM_021724	168.522	106.014	1.58962	0.683723	ko04710		GO:2000189; GO:0071222; GO:0046872; GO:0044212; GO:0043565; GO:0043401; GO:0034144; GO:0030522; GO:0010871; GO:0010467; GO:0008270; GO:0007623; GO:0005654; GO:0005634; GO:0004879; GO:0004872; GO:0003714; GO:0003707; GO:0003700; GO:0000790; GO:0000122
chr20:37590980-37668366	DHX35	NM_021931	35.5978	22.414	1.58819	0.878457			GO:0071013; GO:0016787; GO:0008380; GO:0008026; GO:0005524; GO:0004386; GO:0003676; GO:0000398; GO:0000166
chr4:106629940-106768922	GSTCD	NM_024751	17.7075	11.1657	1.58588	0.889302			GO:0008649; GO:0008150; GO:0006364; GO:0005737; GO:0005575; GO:0003674
chr1:156218894-156252620	SMG5	NM_015327	163.903	103.389	1.5853	0.711421			GO:0051721; GO:0035303; GO:0016071; GO:0016070; GO:0006406; GO:0005829; GO:0005737; GO:0005634; GO:0005515; GO:0000184
chr6:90352514-90529508	MDN1	NM_014611	56.5344	35.7667	1.58064	0.69181			GO:0051082; GO:0016887; GO:0006461; GO:0006200; GO:0005634; GO:0005524; GO:0000166
chr3:66271148-66550945	SLC25A26	NM_173471	33.5614	21.2393	1.58016	0.895019			GO:0016021; GO:0016020; GO:0015805; GO:0006810; GO:0005743; GO:0005739; GO:0005730; GO:0005634; GO:0000095
chr2:213864407-214016383	IKZF2	NM_001079526	0.80518	0.509613	1.57998	1		IKAROS family zinc finger 2 (Helios)	GO:0046982; GO:0046872; GO:0045944; GO:0042803; GO:0008270; GO:0008150; GO:0006355; GO:0005634; GO:0005622; GO:0003677; GO:0003674
chr4:40812043-41216639	APBB2	NM_004307	2.20319	1.39566	1.5786	1			GO:0045749; GO:0045202; GO:0035556; GO:0030426; GO:0030308; GO:0030027; GO:0016020; GO:0008134; GO:0007050; GO:0006355; GO:0005634; GO:0005622; GO:0005515; GO:0001540
chr7:27207438-27209403	MIR196B	NR_029911	39.8447	25.2569	1.57758	0.894275
chr13:111549197-111553567	LOC100505494	XR_109155	42.1138	26.7312	1.57545	0.875518
chr1:203830722-203840280	SNRPE	NM_003094	219.643	139.959	1.56934	0.838473	ko03040		GO:0071013; GO:0034660; GO:0030532; GO:0016070; GO:0010467; GO:0008380; GO:0008334; GO:0006397; GO:0006369; GO:0006366; GO:0005829; GO:0005689; GO:0005683; GO:0005681; GO:0005654; GO:0005634; GO:0005515; GO:0003723; GO:0000398; GO:0000387; GO:0000245
chr3:195590235-195635928	TNK2	NM_005781	25.0372	15.9892	1.56588	0.88874			GO:2000369; GO:0050731; GO:0046872; GO:0031410; GO:0030659; GO:0030136; GO:0030054; GO:0016567; GO:0016310; GO:0007264; GO:0007166; GO:0006897; GO:0005912; GO:0005905; GO:0005886; GO:0005768; GO:0005737; GO:0005634; GO:0005524; GO:0005515; GO:0005095; GO:0004715; GO:0004713; GO:0004712; GO:0004674; GO:0000166
chr11:64590827-64612170	CDC42BPG	NM_017525	53.9632	34.501	1.56411	0.863462		CDC42 binding protein kinase gamma (DMPK-like)	GO:0035556; GO:0031532; GO:0031252; GO:0006468; GO:0005813; GO:0005737; GO:0005524; GO:0005083; GO:0004674; GO:0000287; GO:0000166
chr22:29083730-29137822	CHEK2	NM_001005735	87.4541	56.0125	1.56133	0.875518	ko04111; ko04115; ko04110		GO:0090399; GO:0090307; GO:0072428; GO:0051301; GO:0046872; GO:0046777; GO:0045893; GO:0044257; GO:0042803; GO:0042770; GO:0042176; GO:0019901; GO:0016605; GO:0010332; GO:0008630; GO:0007049; GO:0006975; GO:0006974; GO:0006915; GO:0006355; GO:0006302; GO:0005654; GO:0005634; GO:0005524; GO:0005515; GO:0004674; GO:0000781; GO:0000166; GO:0000086; GO:0000077; GO:0000075
chr9:101494290-101558805	ANKS6	NM_173551	66.2507	42.4383	1.56111	0.89922			GO:0042803; GO:0005737
chr13:113751934-113752848	MCF2L	NM_001112732	29.3626	18.8316	1.55922	0.938454			GO:0051056; GO:0048011; GO:0035023; GO:0008624; GO:0007264; GO:0006915; GO:0005886; GO:0005829; GO:0005737; GO:0005089; GO:0005085
chr3:45718245-45721820	LOC644714	NR_033947	66.9726	42.9724	1.5585	0.871587
chr4:26321297-26436564	RBPJ	NM_015874	30.3112	19.4835	1.55574	0.878433	ko04330		GO:0045892; GO:0010467; GO:0007221; GO:0006355; GO:0006310; GO:0005737; GO:0005730; GO:0005654; GO:0005634; GO:0005515; GO:0003700; GO:0003677; GO:0002193; GO:0001077; GO:0000150
chr17:27939700-27948449	CORO6	NM_032854	44.4926	28.7072	1.54988	0.871587			GO:0051015; GO:0030036; GO:0015629
chr9:84248676-84304546	TLE1	NM_005077	53.5349	34.5665	1.54875	0.883187			GO:0045892; GO:0043124; GO:0030178; GO:0009887; GO:0008134; GO:0007275; GO:0007165; GO:0005667; GO:0005634; GO:0005515; GO:0003682; GO:0001106; GO:0000122
chrX:118599995-118603083	LOC100303728	NR_028443	213.952	138.393	1.54597	0.803199
chr3:51428652-51534018	RBM15B	NM_013286	86.7061	56.1548	1.54406	0.803199			GO:0045892; GO:0044419; GO:0008380; GO:0006913; GO:0006397; GO:0006355; GO:0005730; GO:0005654; GO:0005634; GO:0005515; GO:0005488; GO:0003723; GO:0000381; GO:0000166
chr18:44554572-44556449	TCEB3C	NM_145653	0.132718	0.0860332	1.54264	1		transcription elongation factor B polypeptide 3C (elongin A3)	GO:0016021; GO:0006355; GO:0005634; GO:0003677
chr11:36317724-36486754	PRR5L	NM_024841	0.366867	0.237819	1.54263	1
chr18:44548657-44550298	TCEB3CL	NM_001100817	0.154492	0.100149	1.54262	1		transcription elongation factor B polypeptide 3C-like	GO:0016021; GO:0006355; GO:0005634; GO:0003677
chr1:173831289-173837175	GAS5	NR_002578	15.7544	10.2214	1.54132	0.938454		growth arrest-specific 5 (non-protein coding)
chr19:4007727-4039380	PIAS4	NM_015897	75.6136	49.1164	1.53948	0.871587	ko05222; ko05200; ko04120; ko05160; ko04630		GO:0046872; GO:0045892; GO:0043065; GO:0033235; GO:0032088; GO:0031625; GO:0019789; GO:0016874; GO:0016605; GO:0016363; GO:0016055; GO:0008270; GO:0005737; GO:0005730; GO:0005634; GO:0005515; GO:0003714; GO:0003677; GO:0000122
chr9:21969177-21971486	CDKN2A	NM_058197	40.7226	26.4665	1.53865	0.898666	ko05214; ko05218; ko05200; ko05212; ko04115; ko05219; ko05223; ko04110; ko05220		GO:2000774; GO:2000111; GO:0090399; GO:0090398; GO:0071158; GO:0070534; GO:0070215; GO:0055105; GO:0051444; GO:0051059; GO:0050821; GO:0048103; GO:0046825; GO:0045944; GO:0045893; GO:0045892; GO:0045736; GO:0043517; GO:0043234; GO:0042326; GO:0035986; GO:0035985; GO:0034393; GO:0033235; GO:0033088; GO:0032088; GO:0031648; GO:0031647; GO:0030889; GO:0030308; GO:0019901; GO:0016604; GO:0010389; GO:…
chr10:42970938-42988272	LOC84856	NR_026827	61.6108	40.0529	1.53824	0.904133
chr19:53408207-53421177	LOC388559	XM_496322	19.4952	12.6738	1.53823	0.909939			GO:0046872; GO:0008270; GO:0006355; GO:0005634; GO:0005622; GO:0003677
chrX:149531550-149682448	MAMLD1	NM_005491	14.3737	9.34953	1.53737	0.907464			GO:0008584; GO:0006355; GO:0005634; GO:0005575; GO:0003674
chr12:99038995-100378432	APAF1	NM_181861	14.3684	9.34698	1.53722	0.907464	ko05222; ko05016; ko05014; ko05010; ko04115; ko05012; ko04210		GO:0043531; GO:0043293; GO:0042981; GO:0008656; GO:0008635; GO:0008629; GO:0007399; GO:0006952; GO:0006919; GO:0006915; GO:0005829; GO:0005794; GO:0005737; GO:0005730; GO:0005634; GO:0005622; GO:0005524; GO:0005515; GO:0000166
chr19:21950233-21950388	ZNF100	NM_173531	448.275	291.888	1.53578	0.978773			GO:0046872; GO:0008270; GO:0006355; GO:0005634; GO:0005622; GO:0003677
chr8:8086091-8102387	hCG_1990547	NR_024361	13.1958	8.59658	1.53501	0.961216
chr5:271735-438406	PDCD6	NM_013232	1689.38	1101.07	1.53431	0.886001		programmed cell death 6	GO:0060090; GO:0051592; GO:0048306; GO:0046983; GO:0042803; GO:0031965; GO:0016020; GO:0008624; GO:0006919; GO:0005792; GO:0005789; GO:0005783; GO:0005737; GO:0005634; GO:0005625; GO:0005515; GO:0005509
chr1:209958979-209979496	IRF6	NM_006147	50.6285	33.0222	1.53317	0.871587			GO:0060644; GO:0060337; GO:0060333; GO:0048468; GO:0045893; GO:0043616; GO:0043588; GO:0030216; GO:0019221; GO:0008285; GO:0007050; GO:0005829; GO:0005737; GO:0005634; GO:0005515; GO:0003700; GO:0003677; GO:0000975
chr11:94150465-94227040	MRE11A	NM_005591	13.3896	8.73684	1.53254	0.907464	ko03450; ko03440		GO:0048471; GO:0033674; GO:0032876; GO:0032508; GO:0031954; GO:0030870; GO:0030145; GO:0016787; GO:0008408; GO:0008283; GO:0008022; GO:0007507; GO:0007131; GO:0007129; GO:0007126; GO:0007062; GO:0007004; GO:0006310; GO:0006303; GO:0006302; GO:0006281; GO:0005730; GO:0005654; GO:0005634; GO:0005515; GO:0004520; GO:0004518; GO:0004003; GO:0003690; GO:0003677; GO:0000794; GO:0000790; GO:0000781; GO:…
chr6:38136206-38607924	BTBD9	NM_052893	13.3071	8.70857	1.52805	0.897025		BTB (POZ) domain containing 9	GO:0007155
chr1:16944750-16947324	CROCCL1	NR_026752	70.8756	46.3864	1.52794	0.890517
chr21:34106209-34144169	C21orf66	NM_016631	22.0088	14.4159	1.5267	0.921429		GC-rich sequence DNA-binding factor 1	GO:0006355; GO:0005829; GO:0005634; GO:0003700; GO:0003677
chr1:29213586-29450451	EPB41	NM_203343	14.2251	9.32377	1.52568	0.905305	ko04530		GO:0043234; GO:0043231; GO:0032092; GO:0030866; GO:0030863; GO:0030507; GO:0030036; GO:0019898; GO:0014731; GO:0008091; GO:0008015; GO:0005938; GO:0005886; GO:0005794; GO:0005737; GO:0005634; GO:0005545; GO:0005515; GO:0005200; GO:0003779
chr16:713959-717829	WDR90	NM_145294	20.4158	13.4167	1.52167	0.915529
chr22:42196618-42225846	CCDC134	NM_024821	28.6195	18.8605	1.51743	0.887869			GO:0005576
chr9:110045452-110045980	RAD23B	NM_002874	1204.62	794.164	1.51684	0.868507	ko03420; ko04141		GO:0071942; GO:0032434; GO:0031593; GO:0007283; GO:0006974; GO:0006289; GO:0006281; GO:0005737; GO:0005730; GO:0005654; GO:0005634; GO:0005515; GO:0003697; GO:0003684; GO:0000718; GO:0000715; GO:0000502
chr8:28625174-28747698	INTS9	NM_018250	82.3764	54.3108	1.51676	0.873295			GO:0032039; GO:0016180; GO:0005634; GO:0005515
chr3:63850221-64008500	ATXN7	NM_000333	24.7081	16.2923	1.51655	0.871587			GO:0045944; GO:0043569; GO:0042326; GO:0016578; GO:0016363; GO:0008270; GO:0008219; GO:0007601; GO:0006997; GO:0006355; GO:0005737; GO:0005730; GO:0005634; GO:0005622; GO:0005515; GO:0003682
chr16:87741417-87799612	KLHDC4	NM_017566	194.815	128.525	1.51578	0.871587
chr19:6464180-6481798	CRB3	NM_174881	51.8137	34.2523	1.51271	0.894865	ko04530		GO:0072659; GO:0070830; GO:0045216; GO:0034329; GO:0030054; GO:0019904; GO:0017124; GO:0016324; GO:0016021; GO:0005923; GO:0005886
chr18:20714527-20840434	CABLES1	NM_001100619	21.6434	14.315	1.51194	0.907464			GO:0051726; GO:0051302; GO:0016538; GO:0007596; GO:0007399; GO:0005829; GO:0005737; GO:0005634
chr3:141663269-141868448	TFDP2	NM_001178138	8.81385	5.83739	1.5099	0.915529	ko04110		GO:0019904; GO:0008134; GO:0007507; GO:0007049; GO:0006355; GO:0005667; GO:0005634; GO:0003712; GO:0003700; GO:0003677
chr10:123500416-123687546	ATE1	NM_007041	21.8627	14.4917	1.50864	0.912406			GO:0016746; GO:0016740; GO:0016598; GO:0005737; GO:0005634; GO:0004057
chr10:103866265-103880341	LDB1	NM_003893	87.6078	58.0757	1.50851	0.871587			GO:0060322; GO:0046985; GO:0045944; GO:0045892; GO:0045785; GO:0045647; GO:0043973; GO:0043621; GO:0043234; GO:0042803; GO:0035019; GO:0032784; GO:0030274; GO:0030182; GO:0022607; GO:0021702; GO:0021549; GO:0019899; GO:0016055; GO:0010669; GO:0009948; GO:0007275; GO:0006355; GO:0006351; GO:0005911; GO:0005667; GO:0005634; GO:0003714; GO:0003682; GO:0003677; GO:0001942; GO:0001702; GO:0001158; GO:…
chr1:61542945-61928460	NFIA	NM_001145512	9.31717	6.17738	1.50827	0.908455			GO:0030054; GO:0019079; GO:0008134; GO:0006355; GO:0006260; GO:0005730; GO:0005634; GO:0005622; GO:0003700; GO:0003677
chr11:67022310-67025054	KDM2A	NM_012308	175.932	116.654	1.50815	0.865734			GO:0051864; GO:0046872; GO:0016702; GO:0016568; GO:0016491; GO:0008270; GO:0006355; GO:0005654; GO:0005634; GO:0003677
chr2:55463319-55496384	MTIF2	NM_001005369	74.0388	49.3366	1.50069	0.875518			GO:0043024; GO:0008135; GO:0006446; GO:0006412; GO:0005739; GO:0005622; GO:0005525; GO:0003924; GO:0003743; GO:0000166
chr11:2965675-2966918	NAP1L4	NM_005969	365.242	243.411	1.50052	0.871587			GO:0051082; GO:0006334; GO:0005737; GO:0005678; GO:0005634
chr16:28834413-28848558	ATXN2L	NM_148414	315.122	211.056	1.49307	0.815232			GO:0016020; GO:0008150; GO:0003674
chr7:855193-914557	SUN1	NM_001130965	101.799	68.1825	1.49304	0.871587			GO:0090292; GO:0090286; GO:0043231; GO:0034993; GO:0031965; GO:0016021; GO:0016020; GO:0005637; GO:0005635; GO:0005634; GO:0005515
chr20:62289646-62339514	ARFRP1	NM_003224	71.9329	48.255	1.49068	0.871587			GO:0043001; GO:0042147; GO:0034067; GO:0007369; GO:0007264; GO:0007165; GO:0006184; GO:0005802; GO:0005794; GO:0005624; GO:0005622; GO:0005525; GO:0003924; GO:0000166
chr1:67390360-67454302	MIER1	NM_001146111	10.7296	7.2005	1.49012	0.944343			GO:0043123; GO:0007165; GO:0006355; GO:0005737; GO:0005730; GO:0005634; GO:0004871; GO:0003677
chr19:1354969-1378430	MUM1	NM_032853	62.1744	41.7384	1.48962	0.87353			GO:0031491; GO:0006325; GO:0006281; GO:0005634; GO:0005515
chr12:49412757-49449149	MLL2	NM_003482	97.2149	65.2642	1.48956	0.812662		myeloid/lymphoid or mixed-lineage leukemia 2	GO:0051568; GO:0048477; GO:0046872; GO:0045944; GO:0044212; GO:0043627; GO:0035097; GO:0033148; GO:0018024; GO:0016740; GO:0016568; GO:0008284; GO:0008270; GO:0008168; GO:0006355; GO:0006342; GO:0005634; GO:0005515; GO:0003677; GO:0001701; GO:0001555
chr19:50392910-50432988	IL4I1	NM_172374	55.1013	36.9947	1.48944	0.898666	ko00250; ko00950; ko00380; ko00350; ko00360; ko00400; ko00280; ko00270		GO:0043231; GO:0031965; GO:0016491; GO:0005764; GO:0001716
chr6:32083044-32096017	ATF6B	NM_004381	172.187	115.678	1.4885	0.871587	ko04141		GO:0046983; GO:0043565; GO:0016021; GO:0016020; GO:0007165; GO:0006986; GO:0006355; GO:0006351; GO:0005789; GO:0005783; GO:0005634; GO:0005622; GO:0003700
chr14:24768804-24782776	CIDEB	NM_014430	27.175	18.2582	1.48837	0.891054			GO:0008630; GO:0006917; GO:0006915; GO:0005829; GO:0005622
chr13:113201646-113242481	TUBGCP3	NM_006322	104.982	70.5557	1.48793	0.893134		tubulin, gamma complex associated protein 3	GO:0043015; GO:0007338; GO:0007020; GO:0005874; GO:0005856; GO:0005829; GO:0005827; GO:0005819; GO:0005814; GO:0005813; GO:0005737; GO:0005515; GO:0005200; GO:0005198; GO:0000278; GO:0000086
chr19:55434876-55458873	NLRP7	NM_001127255	12.1483	8.1667	1.48754	0.935969			GO:0005524; GO:0000166
chr8:66629904-66753790	PDE7A	NM_002603	27.7646	18.6904	1.4855	0.914592	ko00230		GO:0046872; GO:0019933; GO:0016787; GO:0007165; GO:0005829; GO:0005737; GO:0004115; GO:0000267
chr1:234040428-234041910	SLC35F3	NM_173508	26.2207	17.6511	1.4855	0.950171		solute carrier family 35, member F3	GO:0016021; GO:0016020; GO:0006810
chr1:173837492-173856048	ZBTB37	NM_001122770	7.31861	4.92671	1.4855	0.958832			GO:0046872; GO:0008270; GO:0006355; GO:0005634; GO:0005622; GO:0003677
chr8:8640880-8751147	MFHAS1	NM_004225	46.0512	31.0167	1.48472	0.871587		malignant fibrous histiocytoma amplified sequence 1
chr20:31367657-31397162	DNMT3B	NM_006892	42.0273	28.3087	1.48461	0.889787	ko00270		GO:0090116; GO:0071230; GO:0051718; GO:0051573; GO:0051571; GO:0046872; GO:0046499; GO:0046498; GO:0045892; GO:0045814; GO:0045666; GO:0045322; GO:0043231; GO:0043045; GO:0042493; GO:0031503; GO:0016740; GO:0010628; GO:0010424; GO:0010212; GO:0009008; GO:0006349; GO:0006346; GO:0006306; GO:0005737; GO:0005730; GO:0005720; GO:0005634; GO:0005515; GO:0003886; GO:0003714; GO:0003677; GO:0000775
chr21:33043312-33104431	SFRS15	NM_020706	85.2848	57.4705	1.48398	0.871587			GO:0008022; GO:0006397; GO:0005730; GO:0005634; GO:0003723; GO:0000166
chr2:242694705-242708259	D2HGDH	NM_152783	40.2479	27.134	1.4833	0.92184		D-2-hydroxyglutarate dehydrogenase	GO:0051990; GO:0051592; GO:0050660; GO:0044267; GO:0032026; GO:0032025; GO:0010043; GO:0010042; GO:0008762; GO:0006103; GO:0005759; GO:0005739
chr1:23695463-23698332	C1orf213	NR_033691	15.3638	10.3745	1.48092	0.961583
chr2:9628775-9695967	ADAM17	NM_003183	44.0549	29.772	1.47974	0.888077	ko05010; ko05120; ko04330		GO:0055099; GO:0051272; GO:0051088; GO:0048870; GO:0048536; GO:0048011; GO:0046872; GO:0045741; GO:0045121; GO:0042493; GO:0035625; GO:0035313; GO:0033627; GO:0033077; GO:0033025; GO:0032722; GO:0032717; GO:0032587; GO:0032496; GO:0031659; GO:0031293; GO:0030511; GO:0030335; GO:0030307; GO:0030183; GO:0030165; GO:0017124; GO:0016324; GO:0015629; GO:0010820; GO:0009986; GO:0008284; GO:0008270; GO:…
chr12:70921234-70935515	LOC100507330	XR_110379	19.8193	13.4213	1.4767	0.920703
chr12:133345494-133405480	GOLGA3	NM_005895	52.226	35.4	1.47531	0.871587			GO:0032580; GO:0017119; GO:0016020; GO:0006891; GO:0005794; GO:0005793; GO:0005737; GO:0005730; GO:0005634; GO:0005215; GO:0000139
chr11:71164216-71190237	NADSYN1	NM_018161	75.518	51.2309	1.47407	0.907464	ko00760		GO:0019674; GO:0016874; GO:0016810; GO:0009435; GO:0006807; GO:0006767; GO:0006766; GO:0005829; GO:0005524; GO:0003952; GO:0000166
chr8:141531049-141645660	EIF2C2	NM_012154	75.8745	51.475	1.47401	0.846038			GO:0070551; GO:0046872; GO:0045947; GO:0035279; GO:0035278; GO:0035197; GO:0035068; GO:0031054; GO:0031047; GO:0030529; GO:0016787; GO:0016442; GO:0006417; GO:0006413; GO:0006412; GO:0006355; GO:0005845; GO:0005844; GO:0005829; GO:0005737; GO:0005634; GO:0005515; GO:0004519; GO:0003743; GO:0000932; GO:0000340
chr6:111880142-111927474	TRAF3IP2	NR_028338	50.9686	34.608	1.47274	0.907464			GO:0043123; GO:0035556; GO:0005622; GO:0005575; GO:0005515
chr8:37654361-37707431	BRF2	NM_018310	46.1222	31.3435	1.47151	0.89687			GO:0046872; GO:0008270; GO:0006383; GO:0006355; GO:0006352; GO:0005654; GO:0005634
chr11:798980-803177	LRDD	NM_145886	63.6849	43.2957	1.47093	0.897694	ko04115		GO:0043066; GO:0007165; GO:0006977; GO:0006974; GO:0005737; GO:0005634; GO:0005515; GO:0005123
chrX:100264333-100307105	TRMT2B	NM_024917	11.9432	8.1197	1.47089	0.945532			GO:0016740; GO:0009021; GO:0008173; GO:0008033; GO:0006396
chr16:128168-136899	MPG	NM_001015052	134.771	91.6655	1.47025	0.877944	ko03410		GO:0052822; GO:0052821; GO:0045007; GO:0043916; GO:0016787; GO:0008725; GO:0006307; GO:0006285; GO:0006284; GO:0006281; GO:0005654; GO:0005634; GO:0005515; GO:0003905; GO:0003824; GO:0003684; GO:0003677
chr7:558575-559269	PDGFA	NM_002607	36.1769	24.624	1.46917	0.961216	ko05215; ko04060; ko04810; ko04010; ko04540; ko05214; ko05218; ko05200; ko04510		GO:2000278; GO:0072124; GO:0070374; GO:0060683; GO:0051897; GO:0051781; GO:0050919; GO:0050730; GO:0048839; GO:0048407; GO:0048286; GO:0048146; GO:0048008; GO:0046982; GO:0045740; GO:0043588; GO:0043499; GO:0043498; GO:0043410; GO:0043406; GO:0042803; GO:0042493; GO:0042060; GO:0035793; GO:0032956; GO:0032526; GO:0032355; GO:0031954; GO:0031093; GO:0030335; GO:0030168; GO:0030036; GO:0030031; GO:…
chr1:68590977-68698284	GPR177	NM_024911	178.422	121.477	1.46877	0.871587			GO:0090263; GO:0043123; GO:0031410; GO:0030659; GO:0016055; GO:0016021; GO:0016020; GO:0007275; GO:0005794; GO:0004872; GO:0004871; GO:0000139
chr22:45072687-45258664	PRR5-ARHGAP8	NM_181334	104.044	70.8802	1.46789	0.881307
chr2:29033699-29063675	SPDYA	NM_182756	0.000124384	8.47562e-05	1.46755	1	ko04914; ko04114		GO:0045737; GO:0019901; GO:0008284; GO:0007275; GO:0007049; GO:0006974; GO:0005634; GO:0000082
chr9:32972607-33001626	APTX	NM_175073	106.094	72.3345	1.46671	0.890012			GO:0051219; GO:0047485; GO:0046872; GO:0046403; GO:0042542; GO:0033699; GO:0031647; GO:0016787; GO:0008967; GO:0008270; GO:0008219; GO:0006974; GO:0006302; GO:0006266; GO:0005730; GO:0005654; GO:0005634; GO:0005622; GO:0005515; GO:0003824; GO:0003725; GO:0003690; GO:0003684; GO:0003682; GO:0000790; GO:0000785; GO:0000012
chr22:46692637-46728033	GTSE1	NM_016426	260	177.303	1.46642	0.943655	ko04115		GO:0007017; GO:0006977; GO:0005881; GO:0005856; GO:0005737; GO:0003674; GO:0000085
chr20:58518990-58522264	C20orf177	NM_001190826	20.4034	13.9299	1.46472	0.929658
chr10:74766974-74856732	P4HA1	NM_001142595	82.1968	56.1211	1.46463	0.881086	ko00330		GO:0046872; GO:0043231; GO:0031418; GO:0030199; GO:0018401; GO:0016706; GO:0016702; GO:0005788; GO:0005783; GO:0005739; GO:0005506; GO:0005488; GO:0004656
chr20:61904164-61921142	ARFGAP1	NM_175609	199.763	136.41	1.46443	0.868507	ko04144		GO:0048205; GO:0046872; GO:0032312; GO:0030660; GO:0016192; GO:0016044; GO:0015031; GO:0008270; GO:0008060; GO:0006890; GO:0005829; GO:0005794; GO:0005737
chr6:43968085-43975146	C6orf223	NM_001171992	61.7701	42.2043	1.4636	0.871587
chr1:19811631-19812038	CAPZB	NM_004930	497.785	340.299	1.46279	0.914761			GO:0071203; GO:0051693; GO:0030863; GO:0030036; GO:0030032; GO:0030030; GO:0030027; GO:0022604; GO:0016020; GO:0015629; GO:0008290; GO:0007596; GO:0007010; GO:0006928; GO:0005856; GO:0005829; GO:0005737; GO:0003779
chr2:74733726-74734858	PCGF1	NM_032673	112.856	77.1877	1.4621	0.913695		polycomb group ring finger 1	GO:0046872; GO:0035518; GO:0031519; GO:0008270; GO:0008022; GO:0006355; GO:0005730; GO:0005634; GO:0005515
chr16:1413205-1464705	UNKL	NM_001193388	29.8158	20.4143	1.46054	0.906247			GO:0046872; GO:0016874; GO:0008270; GO:0005737; GO:0005634; GO:0003676
chr19:1205756-1229783	STK11	NM_000455	98.9786	67.8737	1.45828	0.871587	ko04920; ko04150		GO:0072332; GO:0060770; GO:0060070; GO:0051896; GO:0051645; GO:0051291; GO:0050772; GO:0046777; GO:0046320; GO:0045722; GO:0043276; GO:0043234; GO:0042593; GO:0042304; GO:0033993; GO:0033762; GO:0030511; GO:0030308; GO:0030295; GO:0030275; GO:0030111; GO:0030010; GO:0016020; GO:0010212; GO:0008286; GO:0008285; GO:0007286; GO:0007050; GO:0007049; GO:0006974; GO:0006914; GO:0006468; GO:0006112; GO:…
chr19:54968923-54974996	LENG9	NM_198988	145.136	99.752	1.45497	0.863462			GO:0046872; GO:0016070; GO:0008270; GO:0005622; GO:0003824; GO:0003676
chr4:169552603-169849608	PALLD	NM_001166108	114.054	78.3952	1.45486	0.871587			GO:0051371; GO:0030054; GO:0030027; GO:0030018; GO:0007010; GO:0005925; GO:0005884; GO:0005856; GO:0005737; GO:0005634; GO:0005515; GO:0003779; GO:0001726
chr1:241803196-241803717	OPN3	NM_014322	57.2279	39.3596	1.45398	0.96202			GO:0050896; GO:0042752; GO:0018298; GO:0016021; GO:0016020; GO:0009881; GO:0009584; GO:0009583; GO:0008020; GO:0007602; GO:0007601; GO:0007186; GO:0005887; GO:0004930; GO:0004872; GO:0004871
chr17:3468739-3539651	TRPV1	NM_080704	42.6203	29.3524	1.45202	0.878457	ko04080		GO:0090212; GO:0071502; GO:0071363; GO:0070588; GO:0060454; GO:0060083; GO:0055085; GO:0050968; GO:0050955; GO:0050954; GO:0048266; GO:0045429; GO:0045211; GO:0045202; GO:0043434; GO:0043065; GO:0043025; GO:0042637; GO:0032591; GO:0030425; GO:0030054; GO:0017081; GO:0016021; GO:0014047; GO:0009408; GO:0009268; GO:0007635; GO:0007204; GO:0007166; GO:0006810; GO:0006629; GO:0005887; GO:0005886; GO:…
chr19:19734463-19738339	LPAR2	NM_004720	81.5495	56.1678	1.45189	0.907464	ko04080		GO:0043410; GO:0035025; GO:0030274; GO:0030165; GO:0030139; GO:0009986; GO:0008289; GO:0007204; GO:0007202; GO:0007186; GO:0005887; GO:0005886; GO:0005515; GO:0004930; GO:0004872; GO:0004871; GO:0000187
chr15:59664700-59665071	MYO1E	NM_004998	289.706	199.751	1.45034	0.938788			GO:0048008; GO:0042623; GO:0035166; GO:0032403; GO:0030048; GO:0016459; GO:0015629; GO:0006807; GO:0005737; GO:0005524; GO:0005516; GO:0005515; GO:0003779; GO:0003774; GO:0001822; GO:0001701; GO:0001570; GO:0000166; GO:0000146
chr15:72668044-72668353	HEXA	NM_000520	1048.37	723.061	1.44991	0.915529	ko04142; ko00531; ko00520; ko00603; ko00511; ko00604		GO:0050885; GO:0050884; GO:0048667; GO:0046982; GO:0043169; GO:0042552; GO:0030203; GO:0019953; GO:0019915; GO:0016020; GO:0008219; GO:0007628; GO:0007626; GO:0007605; GO:0007040; GO:0006689; GO:0005975; GO:0005764; GO:0004563; GO:0004553; GO:0001501
chr14:102973166-102975750	ANKRD9	NM_152326	43.4739	29.984	1.4499	0.928596
chr2:172864803-172947145	MAP1D	NM_199227	31.2254	21.5379	1.44979	0.921972			GO:0046872; GO:0031365; GO:0018206; GO:0009987; GO:0008235; GO:0008233; GO:0006508; GO:0005739; GO:0004177
chr19:48948990-48958617	GRWD1	NM_031485	145.364	100.27	1.44973	0.871587			GO:0005737; GO:0005730; GO:0005634
chr5:137086193-137090039	HNRNPA0	NM_006805	486.606	336.631	1.44552	0.852721			GO:0070935; GO:0032496; GO:0030530; GO:0019901; GO:0017091; GO:0010467; GO:0008380; GO:0006954; GO:0006397; GO:0005730; GO:0005654; GO:0005634; GO:0003723; GO:0000398; GO:0000166
chr9:129677052-129985445	RALGPS1	NM_014636	12.2923	8.5068	1.445	0.934322			GO:0035556; GO:0007264; GO:0005886; GO:0005737; GO:0005622; GO:0005575; GO:0005085
chr12:39687029-39837193	KIF21A	NM_001173464	3.34188	2.31338	1.44459	1			GO:0007018; GO:0005874; GO:0005856; GO:0005737; GO:0005524; GO:0003777; GO:0000166
chr8:145202918-145316843	HEATR7A	NM_032450	63.223	43.8133	1.44301	0.878457			GO:0005488
chr19:4053221-4066816	ZBTB7A	NM_015898	78.5223	54.5058	1.44062	0.907464			GO:0046872; GO:0045892; GO:0045670; GO:0035035; GO:0030154; GO:0008270; GO:0007275; GO:0005634; GO:0005622; GO:0003677; GO:0000122
chr16:89344797-89556969	ANKRD11	NM_013275	253.604	176.044	1.44057	0.860658			GO:0060348; GO:0060323; GO:0048705; GO:0035264; GO:0005634; GO:0001894; GO:0001701
chr4:106967232-107237861	TBCK	NM_001163435	21.4744	14.9149	1.4398	0.935139			GO:0016772; GO:0006468; GO:0005622; GO:0005524; GO:0005097; GO:0004672
chr1:228595635-228604583	TRIM17	NM_001134855	1.28644	0.89349	1.43979	1			GO:0051865; GO:0046872; GO:0016874; GO:0008270; GO:0005622; GO:0005575; GO:0005515; GO:0004842
chr17:40723553-40729747	PSMC3IP	NM_016556	87.2076	60.5909	1.43929	0.908455			GO:0050692; GO:0050681; GO:0046966; GO:0045944; GO:0042803; GO:0035259; GO:0030374; GO:0030331; GO:0008150; GO:0007126; GO:0006310; GO:0005634; GO:0005575; GO:0003677
chr3:180319917-180328918	TTC14	NM_133462	28.6198	19.8947	1.43856	0.921972			GO:0005488; GO:0003723
chr1:28879528-28908385	SNHG12	NR_024127	48.3791	33.6318	1.43849	0.944256
chr5:612404-641159	CEP72	NM_018140	36.3077	25.2508	1.43788	0.935139		centrosomal protein 72kDa	GO:0042802; GO:0033566; GO:0007051; GO:0005856; GO:0005829; GO:0005813; GO:0005737; GO:0005515; GO:0000278; GO:0000086
chr6:86386642-86388511	SNHG5	NR_003038	20.1031	13.9979	1.43615	0.961216		small nucleolar RNA host gene 5 (non-protein coding)
chr8:145743368-145754458	LRRC14	NM_014665	42.9572	29.9192	1.43577	0.890704
chr8:48873448-48890707	MCM4	NM_182746	421.144	293.549	1.43466	0.865734	ko04113; ko04111; ko03030; ko04110		GO:0042555; GO:0016787; GO:0006271; GO:0006270; GO:0006260; GO:0005730; GO:0005654; GO:0005634; GO:0005524; GO:0005515; GO:0004386; GO:0004003; GO:0003677; GO:0000278; GO:0000216; GO:0000166; GO:0000084; GO:0000082; GO:0000075
chr10:135233536-135238224	SPRN	NM_001012508	13.5502	9.44493	1.43465	0.942097		shadow of prion protein homolog (zebrafish)	GO:0031225; GO:0005886
chr19:6413114-6424979	KHSRP	NM_003685	453.445	316.121	1.4344	0.865734		KH-type splicing regulatory protein	GO:0051028; GO:0016071; GO:0016070; GO:0008380; GO:0006810; GO:0006397; GO:0006355; GO:0005829; GO:0005737; GO:0005730; GO:0005654; GO:0005634; GO:0003723; GO:0003677; GO:0000375
chr9:136627015-136857475	VAV2	NM_001134398	88.5903	61.7729	1.43413	0.871959	ko04810; ko04664; ko04666; ko04662; ko04062; ko04650; ko04670; ko04660; ko04510		GO:0051056; GO:0050790; GO:0048011; GO:0046872; GO:0043552; GO:0035023; GO:0030168; GO:0030032; GO:0016477; GO:0008624; GO:0007596; GO:0007411; GO:0007264; GO:0007165; GO:0006915; GO:0005886; GO:0005829; GO:0005737; GO:0005515; GO:0005154; GO:0005089; GO:0005085; GO:0001525
chr16:11762288-11836755	SNN	NM_003498	12.3731	8.65223	1.43005	0.956758			GO:0016021; GO:0016020; GO:0009628; GO:0006950; GO:0005741; GO:0005739
chr8:25042229-25273166	DOCK5	NM_024940	68.477	47.92	1.42899	0.871587		dedicator of cytokinesis 5	GO:0051020; GO:0005737; GO:0005525; GO:0005488; GO:0005085
chr1:206516195-206629505	SRGAP2	NM_015326	83.8474	58.7017	1.42836	0.88874	ko04360		GO:0051056; GO:0007411; GO:0007264; GO:0007165; GO:0005829; GO:0005622; GO:0005096
chrX:64732461-64754695	LAS1L	NM_031206	210.812	147.614	1.42813	0.871587			GO:0071339; GO:0005737; GO:0005730; GO:0005634
chr16:31191430-31206192	FUS	NM_004960	676.456	473.943	1.42729	0.868507			GO:0046872; GO:0010467; GO:0008380; GO:0008270; GO:0008219; GO:0005737; GO:0005730; GO:0005654; GO:0005634; GO:0005622; GO:0005515; GO:0003723; GO:0003677; GO:0000398; GO:0000166
chr19:35820071-35838264	CD22	NM_001771	6.19462	4.34251	1.42651	0.969736	ko04514; ko04662; ko04640		GO:0009897; GO:0007155; GO:0005887; GO:0005886; GO:0005529; GO:0005515
chr14:70232999-70234430	LOC100289511	NR_029378	247.837	174.145	1.42316	0.88229
chr1:155531771-155533735	LOC645676	NR_027023	14.6348	10.3063	1.41999	0.960138
chr1:165796776-165880855	UCK2	NM_012474	150.102	105.72	1.41981	0.871587	ko00983; ko00240		GO:0071453; GO:0055086; GO:0048678; GO:0043097; GO:0019206; GO:0016773; GO:0016740; GO:0016301; GO:0009165; GO:0008152; GO:0007631; GO:0006206; GO:0005829; GO:0005792; GO:0005575; GO:0005524; GO:0004849; GO:0000166
chrX:154114634-154250998	F8	NM_000132	0.189634	0.133699	1.41837	1	ko04610		GO:0046872; GO:0031093; GO:0030168; GO:0016491; GO:0007597; GO:0007596; GO:0007155; GO:0006953; GO:0005886; GO:0005615; GO:0005576; GO:0005515; GO:0005507; GO:0002576
chr8:145654162-145669840	NFKBIL2	NM_013432	119.671	84.4044	1.41783	0.871587			GO:0043596; GO:0042994; GO:0042555; GO:0042393; GO:0035101; GO:0031297; GO:0006281; GO:0005737; GO:0005730; GO:0005662; GO:0005634; GO:0005515; GO:0003714; GO:0000724
chr6:24718765-24721117	C6orf62	NM_030939	259.918	183.369	1.41746	0.871587			GO:0008150; GO:0005622; GO:0003674
chr6:33218048-33239669	VPS52	NM_022553	136.431	96.2608	1.41731	0.877226			GO:0016020; GO:0015031; GO:0010008; GO:0005794; GO:0005768
chr14:77893017-77923983	C14orf133	NM_022067	67.926	47.9704	1.416	0.912661			GO:0055037; GO:0030897; GO:0008333; GO:0006886; GO:0006355; GO:0005770; GO:0005769; GO:0005737; GO:0005622; GO:0005515
chr8:41510743-41655140	ANK1	NM_001142446	2.61008	1.84578	1.41408	1			GO:0045199; GO:0031430; GO:0030507; GO:0019899; GO:0016529; GO:0016323; GO:0014731; GO:0008093; GO:0007411; GO:0007165; GO:0007010; GO:0006887; GO:0005886; GO:0005856; GO:0005829; GO:0005737; GO:0005515; GO:0005200; GO:0005198
chr22:41322268-41323514	XPNPEP3	NM_022098	32.7985	23.1943	1.41408	0.957141			GO:0046872; GO:0030145; GO:0009987; GO:0008237; GO:0008233; GO:0006508; GO:0005739; GO:0004177
chr19:10764936-10796443	ILF3	NM_017620	570.065	403.338	1.41337	0.869972			GO:0045893; GO:0045892; GO:0030529; GO:0005739; GO:0005737; GO:0005730; GO:0005634; GO:0005622; GO:0005515; GO:0003725; GO:0003723; GO:0003677; GO:0000279
chr3:48663155-48671279	SLC26A6	NM_022911	74.268	52.5515	1.41324	0.909651			GO:0055085; GO:0034220; GO:0016021; GO:0016020; GO:0015701; GO:0015499; GO:0015301; GO:0015108; GO:0008272; GO:0008271; GO:0006811; GO:0005887; GO:0005886; GO:0005624; GO:0005215
chr1:113241100-113243368	MOV10	NM_020963	220.96	156.409	1.41271	0.912357			GO:0035279; GO:0031047; GO:0016787; GO:0006355; GO:0005737; GO:0005524; GO:0005515; GO:0004386; GO:0003723; GO:0000932; GO:0000166
chrX:152954965-152962048	SLC6A8	NM_005629	263.299	186.58	1.41119	0.871587			GO:0034641; GO:0016021; GO:0015881; GO:0015293; GO:0015220; GO:0006936; GO:0006836; GO:0006814; GO:0006811; GO:0006810; GO:0006600; GO:0005887; GO:0005886; GO:0005328; GO:0005309; GO:0005308
chr6:13574791-13614790	SIRT5	NM_012241	16.0524	11.3839	1.4101	0.944926			GO:0070403; GO:0046872; GO:0016787; GO:0008270; GO:0006476; GO:0006471; GO:0006342; GO:0005759; GO:0005758; GO:0005739; GO:0003950
chr17:7452301-7464976	TNFSF12-TNFSF13	NM_172089	2.89143	2.05067	1.40999	1			GO:0016020; GO:0006955; GO:0005615; GO:0005164; GO:0005125
chr10:112266203-112271302	DUSP5	NM_004419	325.775	231.25	1.40876	0.871587	ko04010		GO:0045892; GO:0035335; GO:0017017; GO:0016787; GO:0006470; GO:0005654; GO:0005634; GO:0004725; GO:0001706; GO:0000188
chr13:114540853-114548862	FLJ41484	XR_110591	61.2039	43.4579	1.40835	0.875518
chr11:69924407-70035651	ANO1	NM_018043	188.422	133.817	1.40806	0.871587			GO:0060438; GO:0034707; GO:0034220; GO:0016021; GO:0007275; GO:0006821; GO:0005886; GO:0005737; GO:0005229; GO:0005216
chr1:156433518-156470628	MEF2D	NM_005920	101.898	72.4711	1.40605	0.871587			GO:0046983; GO:0046982; GO:0045944; GO:0043231; GO:0042826; GO:0042803; GO:0033613; GO:0007517; GO:0007512; GO:0007399; GO:0007275; GO:0006915; GO:0006366; GO:0006355; GO:0005730; GO:0005634; GO:0005515; GO:0003700; GO:0003677; GO:0002062; GO:0001958; GO:0001649; GO:0000981; GO:0000977
chr4:56294138-56412997	CLOCK	NM_004898	46.951	33.3966	1.40586	0.875518	ko04711; ko04710		GO:0071479; GO:0070888; GO:0045944; GO:0043231; GO:0032922; GO:0016746; GO:0009649; GO:0009648; GO:0007623; GO:0007165; GO:0006357; GO:0005737; GO:0005730; GO:0005694; GO:0005667; GO:0005634; GO:0004871; GO:0004402; GO:0003700; GO:0003677; GO:0001190; GO:0000982; GO:0000978; GO:0000077
chr4:83344346-83351619	HNRPDL	NR_003249	263.659	188.074	1.40189	0.871587			GO:0030530; GO:0008143; GO:0006396; GO:0006355; GO:0005737; GO:0005634; GO:0003723; GO:0003697; GO:0003690; GO:0003677; GO:0000166
chr3:37284660-37408370	GOLGA4	NM_002078	33.251	23.7355	1.4009	0.907464			GO:0051020; GO:0043001; GO:0016192; GO:0016020; GO:0005802; GO:0005794; GO:0005737; GO:0005515; GO:0000139; GO:0000042
chr16:23690155-23690661	PLK1	NM_005030	512.684	366.052	1.40058	0.921886	ko04914; ko04110; ko04114		GO:0090007; GO:0071168; GO:0051726; GO:0051443; GO:0051439; GO:0051437; GO:0051297; GO:0051233; GO:0046677; GO:0045862; GO:0045736; GO:0043393; GO:0043066; GO:0040038; GO:0032436; GO:0031648; GO:0031572; GO:0031145; GO:0030496; GO:0019901; GO:0018105; GO:0016567; GO:0010997; GO:0010800; GO:0008283; GO:0008017; GO:0007346; GO:0007092; GO:0007091; GO:0007067; GO:0006468; GO:0005876; GO:0005856; GO:…
chr3:127291907-127299280	TPRA1	NM_001136053	160.632	114.771	1.39959	0.907464			GO:0016021; GO:0016020; GO:0007568; GO:0007186; GO:0006629; GO:0004930
chr3:33429827-33481900	UBP1	NM_001128161	109.589	78.3278	1.39911	0.882906			GO:0045892; GO:0019079; GO:0006357; GO:0005634; GO:0003714; GO:0003700; GO:0003677; GO:0001525
chr4:728333-764428	PCGF3	NM_006315	70.1751	50.1899	1.39819	0.884776			GO:0046872; GO:0031519; GO:0008270; GO:0006355; GO:0005634; GO:0005515
chr3:187439164-187454285	BCL6	NM_001130845	40.9523	29.3068	1.39737	0.929457			GO:0051272; GO:0050776; GO:0050727; GO:0048821; GO:0048294; GO:0046872; GO:0045892; GO:0045749; GO:0045629; GO:0045596; GO:0043565; GO:0043380; GO:0043066; GO:0043065; GO:0035024; GO:0032764; GO:0032319; GO:0031490; GO:0030890; GO:0030308; GO:0030183; GO:0030036; GO:0008285; GO:0008270; GO:0008104; GO:0007283; GO:0006974; GO:0005730; GO:0005657; GO:0005634; GO:0005622; GO:0005515; GO:0003700; GO:…
chr17:8107983-8113940	AURKB	NM_004217	370.37	265.157	1.3968	0.875518			GO:0071777; GO:0051983; GO:0051256; GO:0046872; GO:0046777; GO:0034644; GO:0034501; GO:0032133; GO:0031145; GO:0030496; GO:0016570; GO:0008608; GO:0008283; GO:0007568; GO:0005856; GO:0005829; GO:0005819; GO:0005737; GO:0005694; GO:0005634; GO:0005524; GO:0005515; GO:0004712; GO:0004674; GO:0002903; GO:0000910; GO:0000780; GO:0000779; GO:0000278; GO:0000236; GO:0000166; GO:0000122; GO:0000087
chr19:1609291-1652375	TCF3	NM_003200	198.062	141.815	1.39662	0.871587			GO:0070888; GO:0070644; GO:0070491; GO:0051149; GO:0051091; GO:0050821; GO:0048541; GO:0048468; GO:0046982; GO:0045944; GO:0045893; GO:0045787; GO:0045666; GO:0044212; GO:0043967; GO:0043966; GO:0043565; GO:0043425; GO:0043234; GO:0042803; GO:0042692; GO:0042493; GO:0033152; GO:0033077; GO:0032496; GO:0031435; GO:0030890; GO:0030183; GO:0008134; GO:0007399; GO:0006355; GO:0006351; GO:0005737; GO:…
chr16:2802329-2822234	SRRM2	NM_016333	680.664	488.188	1.39427	0.878457		serine/arginine repetitive matrix 2	GO:0071013; GO:0070742; GO:0047485; GO:0016607; GO:0015030; GO:0008380; GO:0005730; GO:0005634; GO:0003723; GO:0000398
chr22:38203911-38213183	GCAT	NM_001171690	183.542	131.653	1.39413	0.907464	ko00260		GO:0030170; GO:0016769; GO:0016746; GO:0009058; GO:0008890; GO:0006520; GO:0005739
chr5:64885506-64920187	TRIM23	NM_033227	18.6318	13.376	1.39293	0.955987			GO:0046872; GO:0044419; GO:0043085; GO:0019003; GO:0016874; GO:0016567; GO:0016020; GO:0008270; GO:0008047; GO:0007264; GO:0006471; GO:0006184; GO:0005794; GO:0005765; GO:0005737; GO:0005634; GO:0005622; GO:0005525; GO:0005515; GO:0004842; GO:0003924; GO:0000166; GO:0000139
chr10:103585480-103603745	KCNIP2	NM_014591	6.4944	4.66268	1.39285	0.97441			GO:0047485; GO:0046923; GO:0045163; GO:0042802; GO:0008076; GO:0008016; GO:0007268; GO:0007165; GO:0006936; GO:0006813; GO:0006811; GO:0005886; GO:0005737; GO:0005515; GO:0005513; GO:0005509; GO:0005267; GO:0005250; GO:0005244
chr3:125725199-125803192	SLC41A3	NM_001008485	146.707	105.34	1.3927	0.898666			GO:0016021; GO:0008324; GO:0005886
chr1:109822175-109825804	PSRC1	NM_001032291	101.69	73.0464	1.39213	0.928355			GO:0060236; GO:0051301; GO:0045893; GO:0031116; GO:0030496; GO:0030308; GO:0015630; GO:0008017; GO:0007080; GO:0007067; GO:0007049; GO:0005876; GO:0005829; GO:0005819; GO:0005737; GO:0005515; GO:0001578; GO:0000922
chr11:65305020-65325970	LTBP3	NM_001130144	290.507	208.772	1.3915	0.871587			GO:0060430; GO:0060349; GO:0046849; GO:0045780; GO:0032331; GO:0030502; GO:0019838; GO:0007179; GO:0005576; GO:0005509; GO:0005488; GO:0001501
chr1:16527880-16539104	ARHGEF19	NM_153213	86.6853	62.3011	1.39139	0.909939		Rho guanine nucleotide exchange factor (GEF) 19	GO:0042060; GO:0035023; GO:0032956; GO:0032321; GO:0005622; GO:0005096; GO:0005089; GO:0005085
chr5:137620958-137667533	CDC25C	NM_001790	46.281	33.2727	1.39096	0.943655	ko04914; ko04110; ko04114		GO:0051726; GO:0051301; GO:0050699; GO:0044419; GO:0035335; GO:0019901; GO:0016787; GO:0008283; GO:0007089; GO:0007088; GO:0006260; GO:0005829; GO:0005737; GO:0005654; GO:0005634; GO:0005622; GO:0005515; GO:0004725; GO:0000278; GO:0000087; GO:0000086; GO:0000079; GO:0000075
chr1:27730730-27816724	WASF2	NM_006990	200.015	144.123	1.38781	0.871587	ko05131; ko04810; ko05100; ko04666; ko04520		GO:0030048; GO:0030036; GO:0030032; GO:0030027; GO:0016601; GO:0015629; GO:0007188; GO:0006897; GO:0005769; GO:0005737; GO:0005622; GO:0005515; GO:0003779; GO:0001726; GO:0001667; GO:0001525
chr7:128032330-128050036	IMPDH1	NM_000883	122.669	88.5957	1.38459	0.907464	ko00230; ko00983	IMP (inosine 5'-monophosphate) dehydrogenase 1	GO:0055086; GO:0046872; GO:0046651; GO:0016491; GO:0009168; GO:0006177; GO:0006164; GO:0006144; GO:0005829; GO:0005737; GO:0005634; GO:0003938; GO:0003723; GO:0003677; GO:0003676
chr17:42396992-42402217	SLC25A39	NM_001143780	1843.89	1332.41	1.38388	0.871587			GO:0016021; GO:0016020; GO:0006810; GO:0006783; GO:0005743; GO:0005739
chr17:42264339-42271781	TMUB2	NM_024107	138.405	100.03	1.38363	0.878028			GO:0016021; GO:0016020
chr6:41748499-41757634	PRICKLE4	NM_013397	468.026	338.443	1.38288	0.871587			GO:0046872; GO:0008270; GO:0008150; GO:0005634; GO:0003674
chr11:560930-564025	RASSF7	NM_003475	114.261	82.757	1.38068	0.930704			GO:0007165; GO:0006355; GO:0005634; GO:0003677
chr21:45875389-45879720	LRRC3	NM_030891	13.2533	9.59956	1.38062	0.958832			GO:0016021; GO:0016020; GO:0005515
chr12:114182079-114211506	LOC100506465	XR_109132	128.998	93.4747	1.38003	0.907464
chr6:43445260-43474294	TJAP1	NM_001146018	89.9831	65.2181	1.37973	0.916675	ko04530		GO:0030054; GO:0005923; GO:0005794; GO:0005730; GO:0005634; GO:0005515
chrX:135951352-135962939	RBMX	NM_002139	399.601	289.778	1.37899	0.871959	ko03040		GO:0071347; GO:0071013; GO:0070062; GO:0051260; GO:0048026; GO:0048025; GO:0045944; GO:0030530; GO:0030529; GO:0010467; GO:0008380; GO:0006509; GO:0006366; GO:0005719; GO:0005681; GO:0005654; GO:0005634; GO:0005515; GO:0003729; GO:0003723; GO:0003682; GO:0003676; GO:0001047; GO:0000398; GO:0000381; GO:0000166
chr20:58511856-58515595	PPP1R3D	NM_006242	7.9177	5.74362	1.37852	0.96449	ko04910		GO:0042587; GO:0019899; GO:0005981; GO:0005979; GO:0005977; GO:0005975; GO:0005792; GO:0005625; GO:0004722
chr11:8633583-8680383	TRIM66	NM_014818	28.4229	20.6289	1.37782	0.907464			GO:0046872; GO:0016235; GO:0008270; GO:0005730; GO:0005634; GO:0005622
chr3:110790653-110854044	PVRL3	NM_015480	51.8442	37.6449	1.37719	0.935139	ko04514; ko04520		GO:0060042; GO:0050839; GO:0045216; GO:0043296; GO:0042803; GO:0034332; GO:0034329; GO:0016021; GO:0009566; GO:0007156; GO:0005913; GO:0005886; GO:0005515; GO:0002089
chr1:247460671-247495207	ZNF496	NM_032752	60.5376	43.9663	1.37691	0.905305		zinc finger protein 496	GO:0046872; GO:0045893; GO:0043621; GO:0016604; GO:0016032; GO:0008270; GO:0005634; GO:0005622; GO:0005515; GO:0003700; GO:0003677; GO:0000122
chr16:87863630-87866682	LOC100506670	XR_109335	1300.69	945.177	1.37613	0.871959
chr16:84682084-84700561	KLHL36	NM_024731	68.6961	49.9197	1.37613	0.887869
chr4:26321297-26436564	RBPJ	NM_203284	19.5405	14.2036	1.37574	0.946227	ko04330		GO:0045892; GO:0010467; GO:0007221; GO:0006355; GO:0006310; GO:0005737; GO:0005730; GO:0005654; GO:0005634; GO:0005515; GO:0003700; GO:0003677; GO:0002193; GO:0001077; GO:0000150
chr12:53905596-54020246	ATF7	NM_006856	39.8681	28.9955	1.37498	0.908221			GO:0051019; GO:0046983; GO:0046872; GO:0044419; GO:0043565; GO:0034399; GO:0008270; GO:0008134; GO:0006355; GO:0005737; GO:0005654; GO:0005634; GO:0005622; GO:0005515; GO:0003700
chr7:128594233-128697293	TNPO3	NR_034053	111.291	80.9638	1.37458	0.889302			GO:0043231; GO:0035048; GO:0015031; GO:0005737; GO:0005730; GO:0005634; GO:0005515; GO:0004872
chr10:101370274-101380224	SLC25A28	NM_031212	126.368	92.0247	1.3732	0.907464		solute carrier family 25, member 28	GO:0055072; GO:0016021; GO:0016020; GO:0006811; GO:0005743; GO:0005739
chr15:45658258-45658393	GATM	NM_001482	247.348	180.384	1.37123	0.991478	ko00330; ko00260	glycine amidinotransferase (L-arginine:glycine amidinotransferase)	GO:0046689; GO:0043434; GO:0042246; GO:0034641; GO:0016740; GO:0016020; GO:0015068; GO:0010033; GO:0009790; GO:0007584; GO:0006979; GO:0006601; GO:0006600; GO:0005758; GO:0005743; GO:0005739; GO:0005737
chr8:102698769-103137135	NCALD	NM_001040624	0.485416	0.354001	1.37123	1			GO:0030276; GO:0030130; GO:0016192; GO:0015631; GO:0007268; GO:0005829; GO:0005622; GO:0005509; GO:0003779
chr12:72656326-72667313	LOC283392	NR_026836	3.47282	2.53264	1.37123	1
chr10:120789227-120794504	NANOS1	NM_199461	16.4662	12.0084	1.37122	0.949791			GO:0048471; GO:0046872; GO:0030371; GO:0017148; GO:0016477; GO:0010631; GO:0008270; GO:0005737; GO:0005515; GO:0003723
chr3:45017731-45054171	EXOSC7	NM_015004	233.417	170.482	1.36916	0.907464	ko03018		GO:0043928; GO:0016071; GO:0016070; GO:0006401; GO:0006396; GO:0006364; GO:0005829; GO:0005737; GO:0005730; GO:0005634; GO:0005515; GO:0004532; GO:0003723; GO:0000288; GO:0000178; GO:0000175
chr16:903633-1031318	LMF1	NR_033646	31.2571	22.8352	1.36881	0.95035			GO:0090207; GO:0090181; GO:0051604; GO:0051006; GO:0034382; GO:0033578; GO:0016021; GO:0016020; GO:0009306; GO:0006888; GO:0005789; GO:0005783
chr5:110833333-110848266	STARD4	NM_139164	55.8202	40.8215	1.36742	0.93493			GO:0008289; GO:0006869; GO:0006810
chr17:43471267-43503080	ARHGAP27	NM_199282	101.846	74.6196	1.36487	0.907464			GO:0043089; GO:0032855; GO:0030675; GO:0017124; GO:0016020; GO:0007165; GO:0006898; GO:0005737; GO:0005622; GO:0005096
chr15:34517190-34629961	SLC12A6	NM_001042496	22.3342	16.3643	1.36481	0.935139			GO:0071477; GO:0055085; GO:0016323; GO:0016021; GO:0015379; GO:0015293; GO:0006821; GO:0006814; GO:0006813; GO:0006811; GO:0005886; GO:0005215; GO:0001525
chr8:67783736-67834283	C8orf45	NM_173518	12.2584	8.98417	1.36444	0.958305			GO:0006260; GO:0005524; GO:0003677
chr1:980903-991492	AGRN	NM_198576	71.9063	52.7766	1.36247	0.902117	ko04512		GO:0050808; GO:0045944; GO:0045213; GO:0045202; GO:0045162; GO:0043525; GO:0043236; GO:0043113; GO:0031012; GO:0030548; GO:0010469; GO:0009986; GO:0008582; GO:0007528; GO:0007416; GO:0007411; GO:0007213; GO:0007165; GO:0007009; GO:0005615; GO:0005605; GO:0005576; GO:0005515; GO:0005200
chr14:50999761-51099850	ATL1	NM_001127713	7.97608	5.85631	1.36196	0.969736			GO:0051260; GO:0042995; GO:0042802; GO:0030424; GO:0016787; GO:0016021; GO:0016020; GO:0008219; GO:0007409; GO:0007029; GO:0006184; GO:0005794; GO:0005792; GO:0005789; GO:0005783; GO:0005525; GO:0005515; GO:0003924; GO:0000166; GO:0000139; GO:0000137
chr17:42282400-42298277	UBTF	NM_001076683	132.803	97.5837	1.36091	0.887139			GO:0045943; GO:0006363; GO:0006362; GO:0006361; GO:0006360; GO:0006356; GO:0005730; GO:0005654; GO:0005634; GO:0005515; GO:0003677; GO:0000183
chrX:24167761-24234372	ZFX	NM_001178085	18.0665	13.2756	1.36088	0.939755			GO:0046872; GO:0008270; GO:0006355; GO:0005730; GO:0005634; GO:0005622; GO:0003713; GO:0003677
chr3:51428652-51534018	VPRBP	NM_014703	86.1821	63.3433	1.36056	0.895438			GO:0044419; GO:0008180; GO:0005737; GO:0005634; GO:0005515
chr10:29746276-30024730	SVIL	NM_021738	9.5833	7.04431	1.36043	0.956607			GO:0071437; GO:0051015; GO:0043034; GO:0030054; GO:0015629; GO:0007519; GO:0007010; GO:0005886; GO:0005737; GO:0005634; GO:0002102
chr2:238494215-238499769	RAB17	NM_022449	47.3264	34.8248	1.35899	0.961247			GO:0015031; GO:0007264; GO:0005886; GO:0005622; GO:0005525; GO:0000166
chr10:127512077-127512296	BCCIP	NM_016567	15293.8	11260.1	1.35823	0.886387			GO:0061101; GO:0019908; GO:0019207; GO:0007049; GO:0006281; GO:0005634; GO:0005515; GO:0000079
chr12:133302253-133313931	ANKLE2	NM_015114	85.2911	62.803	1.35807	0.918693		ankyrin repeat and LEM domain containing 2	GO:0016021; GO:0016020; GO:0005737; GO:0005635
chr15:34671268-34729667	GOLGA8A	NR_027409	47.9377	35.3146	1.35745	0.920703			GO:0032580; GO:0016020; GO:0005794
chr2:24443187-24583397	ITSN2	NM_006277	23.466	17.289	1.35728	0.949811			GO:0035023; GO:0006897; GO:0005737; GO:0005622; GO:0005509; GO:0005089; GO:0005070
chr9:116225953-116360018	RGS3	NM_144488	51.3547	37.8596	1.35645	0.929658	ko04360		GO:0043547; GO:0009968; GO:0008277; GO:0005886; GO:0005829; GO:0005737; GO:0005634; GO:0005096; GO:0004871; GO:0000188
chr13:76111550-76112007	COMMD6	NM_203497	1257.78	927.631	1.35591	0.928355			GO:0005737; GO:0005634; GO:0005515
chr13:47127271-47327176	LRCH1	NM_001164211	24.2109	17.8657	1.35516	0.947795
chr3:49027247-49053386	P4HTM	NM_177938	223.465	164.913	1.35505	0.878457			GO:0031418; GO:0016706; GO:0016702; GO:0016021; GO:0016020; GO:0005789; GO:0005783; GO:0005509; GO:0005506
chr18:77155771-77289323	NFATC1	NM_006162	37.0956	27.3885	1.35442	0.935139	ko04360; ko04310; ko04650; ko04660; ko04662; ko04370		GO:0048273; GO:0045944; GO:0045893; GO:0044212; GO:0035556; GO:0006366; GO:0006355; GO:0005737; GO:0005634; GO:0005528; GO:0005515; GO:0003705; GO:0003700; GO:0003677; GO:0001085; GO:0000980; GO:0000790
chr22:19033674-19109967	DGCR2	NM_005137	52.8721	39.0463	1.35409	0.935139		DiGeorge syndrome critical region gene 2	GO:0016021; GO:0016020; GO:0009887; GO:0007155; GO:0005529; GO:0005488; GO:0004872
chr1:1592811-1624302	RP11-345P4.4	NM_001110781	55.4562	40.9874	1.35301	0.907464			GO:0016021; GO:0016020
chr21:47744035-47865682	PCNT	NM_006031	30.5239	22.5917	1.35111	0.909939			GO:0061351; GO:0048854; GO:0042384; GO:0035264; GO:0035108; GO:0021772; GO:0021696; GO:0007051; GO:0006915; GO:0005874; GO:0005856; GO:0005829; GO:0005814; GO:0005813; GO:0005737; GO:0005516; GO:0005515; GO:0001764; GO:0001701; GO:0000278; GO:0000226; GO:0000086
chr1:155247373-155259638	HCN3	NM_020897	7.85317	5.81595	1.35028	0.971374			GO:0055085; GO:0030552; GO:0016021; GO:0007268; GO:0006813; GO:0006811; GO:0005886; GO:0005272; GO:0005249; GO:0005244; GO:0000166
chr16:89574802-89604831	SPG7	NM_199367	81.1717	60.1213	1.35013	0.928355			GO:0051082; GO:0046872; GO:0031966; GO:0030163; GO:0017111; GO:0016021; GO:0016020; GO:0008270; GO:0008233; GO:0008219; GO:0008089; GO:0007399; GO:0007005; GO:0006508; GO:0005739; GO:0005524; GO:0004222; GO:0000166
chr19:10812102-10824043	QTRT1	NM_031209	124.715	92.4243	1.34937	0.936108			GO:0046872; GO:0016757; GO:0008616; GO:0008479; GO:0006400; GO:0005840; GO:0005739; GO:0005737; GO:0005634
chrX:153607594-153609883	EMD	NM_000117	460.415	341.281	1.34908	0.890517	ko05414; ko05412; ko05410		GO:0071363; GO:0060828; GO:0048487; GO:0048147; GO:0046827; GO:0035414; GO:0031965; GO:0031468; GO:0016021; GO:0016020; GO:0007517; GO:0006936; GO:0005874; GO:0005819; GO:0005783; GO:0005640; GO:0005637; GO:0005635; GO:0005634; GO:0005515; GO:0003779
chr11:70244611-70282690	CTTN	NM_001184740	389.705	288.975	1.34858	0.881369	ko05131; ko05130; ko05100; ko04530		GO:0030027; GO:0005938; GO:0005856; GO:0005737; GO:0005625; GO:0005515; GO:0001726
chr21:37406838-37432816	SETD4	NM_017438	29.1753	21.65	1.34759	0.957392
chr7:44788529-44809515	ZMIZ2	NM_031449	179.743	133.397	1.34743	0.881411			GO:0046872; GO:0045944; GO:0043596; GO:0030374; GO:0008270; GO:0006355; GO:0005739; GO:0005730; GO:0005634; GO:0005515
chr4:170541720-170644324	CLCN3	NM_001829	50.8073	37.7187	1.34701	0.920703			GO:0055085; GO:0048388; GO:0046982; GO:0042803; GO:0031902; GO:0031901; GO:0031410; GO:0030658; GO:0030165; GO:0016021; GO:0016020; GO:0015297; GO:0012506; GO:0009986; GO:0006885; GO:0006821; GO:0006811; GO:0006810; GO:0005794; GO:0005770; GO:0005769; GO:0005524; GO:0005515; GO:0005254; GO:0005247; GO:0005216; GO:0000166; GO:0000139
chr17:36861531-36886056	MLLT6	NM_005937	96.0661	71.4192	1.3451	0.887139		myeloid/lymphoid or mixed-lineage leukemia (trithorax homolog, Drosophila); translocated to, 6	GO:0046872; GO:0008270; GO:0006355; GO:0005634; GO:0005515
chr3:187930720-188608460	LPP	NM_005578	47.0989	35.0404	1.34413	0.976652			GO:0046872; GO:0030054; GO:0008270; GO:0008150; GO:0007155; GO:0005925; GO:0005886; GO:0005737; GO:0005634; GO:0005515
chr8:145578875-145584946	GPR172A	NM_024531	265.746	198.222	1.34065	0.898666			GO:0032218; GO:0032217; GO:0006810; GO:0005887; GO:0005886; GO:0004872
chr11:72396113-72433563	ARAP1	NM_001040118	98.3324	73.352	1.34056	0.907464	ko04144		GO:0051497; GO:0051491; GO:0051270; GO:0051056; GO:0046872; GO:0043089; GO:0032580; GO:0032312; GO:0030037; GO:0008360; GO:0008270; GO:0008060; GO:0007264; GO:0007165; GO:0005886; GO:0005829; GO:0005794; GO:0005737; GO:0005622; GO:0005547; GO:0005515; GO:0005100
chr4:106067942-106200958	TET2	NM_001127208	8.76018	6.54119	1.33923	0.949631			GO:0070579; GO:0046872; GO:0030099; GO:0016702; GO:0016491; GO:0007049
chr19:33685435-33699773	LRP3	NM_002333	74.7072	55.7887	1.33911	0.920703			GO:0016021; GO:0016020; GO:0006898; GO:0005905; GO:0004872
chr16:90015150-90025774	DEF8	NM_207514	336.664	251.534	1.33844	0.924032			GO:0046872; GO:0035556; GO:0008270
chr3:156390959-156393502	LOC100287227	NR_027954	18.0407	13.4797	1.33836	0.965358
chr2:201983363-202006323	CFLAR	NM_003879	41.056	30.6764	1.33836	0.965358	ko05142; ko04210		GO:0044419; GO:0043154; GO:0043123; GO:0008624; GO:0006916; GO:0006508; GO:0005737; GO:0005515; GO:0004197
chr14:99947637-100070727	CCDC85C	NM_001144995	20.0113	14.9645	1.33725	0.948548
chr3:52870975-52931597	TMEM110	NM_198563	34.1458	25.5478	1.33655	0.946227			GO:0016021; GO:0016020; GO:0008150; GO:0005575; GO:0003674
chr5:139781398-139929163	ANKHD1-EIF4EBP3	NM_020690	108.573	81.3367	1.33486	0.889473			GO:0005737; GO:0005730; GO:0005634; GO:0003723
chr10:121599903-121632394	C10orf119	NM_024834	348.244	261.07	1.33391	0.898666			GO:0051301; GO:0042555; GO:0007067; GO:0007062; GO:0007049; GO:0006261; GO:0005886; GO:0005737; GO:0005730; GO:0005634; GO:0003682; GO:0000084
chr11:62480008-62495140	HNRNPUL2	NM_001079559	190.224	142.608	1.33389	0.887869			GO:0016301; GO:0008150; GO:0005634; GO:0005524; GO:0003676
chr14:23789396-23793794	PABPN1	NM_004643	180.82	135.602	1.33346	0.90851			GO:0046778; GO:0031124; GO:0030529; GO:0019058; GO:0019054; GO:0019048; GO:0016973; GO:0010467; GO:0008380; GO:0006936; GO:0006397; GO:0006396; GO:0006369; GO:0006366; GO:0005737; GO:0005730; GO:0005654; GO:0005634; GO:0005515; GO:0003723; GO:0000398; GO:0000166
chr4:83845755-83934086	LIN54	NM_194282	22.7647	17.0739	1.3333	0.950617			GO:0007049; GO:0006355; GO:0005634; GO:0003677
chr10:92631708-92668312	RPP30	NM_001104546	23.1541	17.3834	1.33197	0.951291	ko03013		GO:0016787; GO:0008033; GO:0005730; GO:0005655; GO:0005634; GO:0004540; GO:0004526
chr18:672542-712662	ENOSF1	NM_001126123	12.2242	9.18409	1.33102	0.97873			GO:0046872; GO:0016853; GO:0009063; GO:0008150; GO:0005739; GO:0005575; GO:0003674
chr22:19118320-19120136	TSSK2	NM_053006	6.06036	4.55358	1.3309	0.982422			GO:0046777; GO:0030154; GO:0007286; GO:0007283; GO:0007275; GO:0006468; GO:0005856; GO:0005814; GO:0005737; GO:0005524; GO:0005515; GO:0004674; GO:0001669; GO:0000287; GO:0000166
chr15:90171200-90174278	KIF7	NM_198525	24.0991	18.1074	1.3309	0.962949			GO:0045880; GO:0045879; GO:0007018; GO:0005929; GO:0005524; GO:0005515; GO:0003777; GO:0000166
chr1:160185504-160232568	DCAF8	NM_015726	148.203	111.465	1.32959	0.907464			GO:0080008; GO:0016567; GO:0005515
chr6:34204576-34214008	HMGA1	NM_145899	9274.55	6976.87	1.32933	0.935139			GO:2000774; GO:0090402; GO:0051575; GO:0046965; GO:0045893; GO:0045892; GO:0044419; GO:0042975; GO:0042974; GO:0035986; GO:0035985; GO:0031936; GO:0030374; GO:0019899; GO:0019059; GO:0019047; GO:0016032; GO:0009615; GO:0008285; GO:0008134; GO:0006461; GO:0006355; GO:0006337; GO:0006284; GO:0006268; GO:0005829; GO:0005694; GO:0005667; GO:0005654; GO:0005634; GO:0005515; GO:0003906; GO:0003700; GO:…
chr21:43406939-43430496	ZNF295	NM_001098403	30.5338	23.0195	1.32643	0.939755			GO:0046872; GO:0045892; GO:0008327; GO:0008270; GO:0006355; GO:0005634; GO:0005622; GO:0005515; GO:0003677
chr2:201754049-201768655	NIF3L1	NM_021824	116.108	87.5612	1.32602	0.948548			GO:0045893; GO:0008134; GO:0005739; GO:0005737; GO:0005515
chr3:49066988-49131504	QRICH1	NM_017730	211.624	159.777	1.3245	0.898666			GO:0008150; GO:0005575; GO:0003674
chr17:7284364-7297870	TNK1	NM_003985	51.7855	39.1011	1.3244	0.948548			GO:0046777; GO:0046580; GO:0030308; GO:0016020; GO:0007165; GO:0006468; GO:0005829; GO:0005737; GO:0005524; GO:0005515; GO:0004871; GO:0004715; GO:0004713; GO:0000166
chr3:186501360-186508351	EIF4A2	NM_001967	275.847	208.43	1.32345	0.894865	ko03013		GO:0044419; GO:0044267; GO:0016787; GO:0016281; GO:0016071; GO:0016070; GO:0010467; GO:0008026; GO:0006446; GO:0006413; GO:0006412; GO:0005829; GO:0005524; GO:0005515; GO:0004386; GO:0003743; GO:0003723; GO:0003676; GO:0000289; GO:0000288; GO:0000166
chr9:115241309-115254860	C9orf147	XR_108968	7.28051	5.50613	1.32226	0.989566
chrX:153167984-153172620	AVPR2	NR_027419	2.12157	1.60451	1.32225	1	ko04080; ko04962		GO:0055085; GO:0035814; GO:0035811; GO:0034097; GO:0032609; GO:0021537; GO:0016021; GO:0010628; GO:0008284; GO:0007599; GO:0007588; GO:0007249; GO:0007190; GO:0007188; GO:0006833; GO:0005887; GO:0005886; GO:0005794; GO:0005783; GO:0005768; GO:0005000; GO:0004930; GO:0004872; GO:0004871; GO:0003084
chr6:41040706-41108573	LOC221442	NR_026938	28.3227	21.4408	1.32097	0.935139
chr2:220299699-220358354	SPEG	NM_005876	16.6256	12.5892	1.32062	0.957572			GO:0042692; GO:0008285; GO:0007517; GO:0005634; GO:0005524; GO:0004674; GO:0000166
chr15:68482309-68498871	CALML4	NM_033429	17.6558	13.3782	1.31974	0.961216		calmodulin-like 4	GO:0005509
chr22:45559725-45583892	NUP50	NM_153645	115.111	87.2224	1.31974	0.907464	ko03013		GO:0055085; GO:0051028; GO:0046907; GO:0031965; GO:0016032; GO:0016020; GO:0015758; GO:0015031; GO:0010827; GO:0008645; GO:0005975; GO:0005654; GO:0005643; GO:0005634; GO:0005515
chr1:151104160-151119140	SEMA6C	NM_001178061	8.38254	6.35289	1.31948	0.972006	ko04360		GO:0030154; GO:0016021; GO:0016020; GO:0007399; GO:0007275; GO:0004872
chr9:140729223-140730540	EHMT1	NM_024757	63.412	48.0867	1.3187	0.964219	ko00310		GO:0070734; GO:0051567; GO:0046976; GO:0046974; GO:0046872; GO:0045892; GO:0034968; GO:0018027; GO:0018026; GO:0018024; GO:0016740; GO:0016571; GO:0016568; GO:0016279; GO:0009790; GO:0008270; GO:0008168; GO:0006306; GO:0005694; GO:0005634; GO:0005515; GO:0002039; GO:0000122
chr16:31128949-31144380	MYST1	NM_032188	127.429	96.6424	1.31856	0.921817			GO:0072487; GO:0071339; GO:0046872; GO:0045893; GO:0045892; GO:0043984; GO:0035064; GO:0030099; GO:0016573; GO:0016568; GO:0016407; GO:0008134; GO:0005634; GO:0005515; GO:0004402
chr15:34817482-34875771	GOLGA8B	NR_027410	47.2365	35.8994	1.3158	0.937371			GO:0032580; GO:0016020; GO:0005794
chr8:28747910-28910888	HMBOX1	NM_001135726	20.3897	15.5266	1.31321	0.96449			GO:0045893; GO:0045892; GO:0043565; GO:0005737; GO:0005634; GO:0003700
chr9:138898386-138987168	NACC2	NM_144653	69.9424	53.303	1.31217	0.916974			GO:0051260; GO:0045892; GO:0016604; GO:0008284; GO:0005634
chr16:89344797-89556969	LOC100506251	XR_109343	58.4263	44.5434	1.31167	0.93671
chr10:78629358-79397577	KCNMA1	NM_001014797	0.299447	0.228421	1.31094	1	ko04970; ko04270; ko04972		GO:0071805; GO:0060083; GO:0060073; GO:0060072; GO:0055085; GO:0051592; GO:0046872; GO:0045794; GO:0043065; GO:0042391; GO:0034465; GO:0030168; GO:0030007; GO:0016324; GO:0016021; GO:0015269; GO:0008076; GO:0007596; GO:0007268; GO:0006970; GO:0006813; GO:0006811; GO:0005901; GO:0005886; GO:0005515; GO:0005267; GO:0005249; GO:0005244; GO:0003779; GO:0001666; GO:0000166
chr12:57106210-57119326	NACA	NM_001113203	345.259	263.801	1.30879	0.901149			GO:0044419; GO:0015031; GO:0006412; GO:0006351; GO:0005854; GO:0005737; GO:0005634; GO:0003677
chr13:115079909-115092803	ZNF828	NM_032436	88.0712	67.414	1.30642	0.935034			GO:0051315; GO:0046872; GO:0035372; GO:0034501; GO:0031134; GO:0008270; GO:0005856; GO:0005819; GO:0005737; GO:0005730; GO:0005634; GO:0005622; GO:0005515; GO:0003676; GO:0000793; GO:0000777
chr19:49458116-49465055	BAX	NR_027882	304.9	233.434	1.30615	0.962011	ko05210; ko05014; ko04210; ko05016; ko05200; ko04115; ko04722; ko05020; ko04141		GO:0097136; GO:0051881; GO:0051434; GO:0051260; GO:0046982; GO:0046930; GO:0046674; GO:0043653; GO:0043525; GO:0043497; GO:0043496; GO:0042981; GO:0042803; GO:0042802; GO:0032976; GO:0032091; GO:0030264; GO:0016020; GO:0015267; GO:0010248; GO:0009636; GO:0008637; GO:0008635; GO:0008634; GO:0008633; GO:0008629; GO:0008624; GO:0008289; GO:0008053; GO:0006927; GO:0006922; GO:0006919; GO:0006917; GO:…
chr8:146024260-146052425	ZNF517	NM_213605	13.3916	10.2565	1.30567	0.975364		zinc finger protein 517	GO:0046872; GO:0008270; GO:0006355; GO:0005634; GO:0005622; GO:0003677
chr10:135207620-135215415	MTG1	NM_138384	50.2886	38.5757	1.30363	0.971916			GO:0005739; GO:0005730; GO:0005634; GO:0005622; GO:0005525; GO:0000166
chr16:2097980-2185933	TSC2	NM_001077183	58.8136	45.131	1.30318	0.930604	ko04910; ko04150; ko04115	tuberous sclerosis 2	GO:0071889; GO:0051898; GO:0051726; GO:0051291; GO:0051260; GO:0051056; GO:0050918; GO:0050680; GO:0048471; GO:0048015; GO:0048011; GO:0048009; GO:0046982; GO:0046626; GO:0045792; GO:0045184; GO:0044430; GO:0043547; GO:0043491; GO:0043407; GO:0043025; GO:0042803; GO:0033596; GO:0032007; GO:0030426; GO:0030425; GO:0030178; GO:0030100; GO:0030030; GO:0019902; GO:0016192; GO:0016020; GO:0014067; GO:…
chr1:154955769-154965587	FLAD1	NM_201398	159.342	122.402	1.30179	0.932754	ko00740		GO:0016779; GO:0016740; GO:0006777; GO:0006767; GO:0006766; GO:0006747; GO:0005829; GO:0005524; GO:0003919; GO:0003824; GO:0000166
chr10:62538088-62554610	CDK1	NM_001786	169.789	130.472	1.30134	0.938454	ko04115; ko04914; ko04540; ko04110; ko04114		GO:0070301; GO:0060045; GO:0055015; GO:0051439; GO:0051437; GO:0051403; GO:0051301; GO:0048678; GO:0048011; GO:0046688; GO:0046686; GO:0045995; GO:0045931; GO:0045740; GO:0045471; GO:0045087; GO:0042493; GO:0035173; GO:0034501; GO:0034142; GO:0034138; GO:0034134; GO:0034130; GO:0033160; GO:0031145; GO:0031100; GO:0030544; GO:0030496; GO:0030332; GO:0030261; GO:0016477; GO:0014823; GO:0014075; GO:…
chr16:88780785-88851653	FAM38A	NM_001142864	144.924	111.421	1.30069	0.907464			GO:0033634; GO:0033625; GO:0033116; GO:0016021; GO:0006811; GO:0005886; GO:0005789; GO:0005783; GO:0005216
chr9:34250654-34329244	KIF24	NM_194313	27.3738	21.0721	1.29905	0.949791		kinesin family member 24	GO:0007018; GO:0005874; GO:0005856; GO:0005737; GO:0005524; GO:0005515; GO:0003777; GO:0000166
chr21:47705613-47712264	C21orf57	NM_058181	47.6855	36.7248	1.29845	0.964045			GO:0046872; GO:0005739; GO:0004222
chr3:101395273-101398061	LOC100009676	NR_024407	24.0669	18.5543	1.29711	0.968354
chr22:38338829-38349603	C22orf23	NM_032561	19.8452	15.3115	1.2961	0.973105			GO:0008150; GO:0005575; GO:0003674
chr1:54690890-54692974	SSBP3	NM_018070	82.4448	63.6278	1.29574	0.958832			GO:2000744; GO:0060323; GO:0045944; GO:0043234; GO:0043066; GO:0021547; GO:0021501; GO:0008284; GO:0006461; GO:0005634; GO:0003697; GO:0003677
chr1:44165394-44170900	LOC100132774	NR_033827	68.3247	52.7311	1.29572	0.96202
chrX:110924345-111003877	ALG13	NM_001099922	0.464436	0.359049	1.29352	1	ko00510		GO:0044267; GO:0043687; GO:0030259; GO:0030246; GO:0018279; GO:0016758; GO:0006488; GO:0005975; GO:0005789; GO:0005783; GO:0004577
chr5:441612-443258	C5orf55	NM_138464	13.5482	10.4792	1.29287	0.979854			GO:0005576
chr12:31435543-31435808	FAM60A	NM_001135811	913.119	706.675	1.29213	0.968458
chr11:68228184-68382802	SAPS3	NM_001164160	85.6926	66.4183	1.2902	0.935139			GO:0043666; GO:0019903; GO:0005737; GO:0005634; GO:0005515
chr12:48166966-48213763	HDAC7	NM_001098416	44.049	34.1525	1.28977	0.949137			GO:0090050; GO:0071889; GO:0070491; GO:0046970; GO:0046969; GO:0045668; GO:0034739; GO:0033613; GO:0032703; GO:0032041; GO:0019901; GO:0016787; GO:0016568; GO:0007043; GO:0005737; GO:0005634; GO:0005080; GO:0003682; GO:0001570; GO:0000122; GO:0000118
chr19:36500021-36505141	ALKBH6	NM_032878	116.031	89.9965	1.28928	0.96449		alkB, alkylation repair homolog 6 (E. coli)	GO:0046872; GO:0016706; GO:0016702; GO:0016491; GO:0005737; GO:0005634
chr3:160801670-160823216	B3GALNT1	NM_001038628	12.7279	9.87551	1.28883	0.976652	ko00603		GO:0047273; GO:0016757; GO:0016021; GO:0016020; GO:0009312; GO:0008499; GO:0008378; GO:0006486; GO:0005794; GO:0000139
chr1:113066139-113162040	ST7L	NM_017744	12.1172	9.40522	1.28835	0.972087			GO:0030308; GO:0016021; GO:0016020; GO:0005488
chr11:61891444-61921814	INCENP	NM_001040694	122.773	95.3355	1.2878	0.921886		inner centromere protein antigens 135/155kDa	GO:0043234; GO:0030496; GO:0007059; GO:0005874; GO:0005856; GO:0005829; GO:0005819; GO:0005737; GO:0005721; GO:0005694; GO:0005634; GO:0005515; GO:0000910; GO:0000801; GO:0000777; GO:0000776; GO:0000775; GO:0000278; GO:0000236; GO:0000087
chr5:36606456-36688436	SLC1A3	NM_004172	33.9795	26.3873	1.28772	0.96202			GO:0071436; GO:0070779; GO:0055085; GO:0051938; GO:0050885; GO:0050806; GO:0048667; GO:0046677; GO:0045202; GO:0043490; GO:0043205; GO:0043197; GO:0043025; GO:0043005; GO:0042493; GO:0031223; GO:0021545; GO:0017153; GO:0016595; GO:0016323; GO:0016021; GO:0016020; GO:0015813; GO:0015807; GO:0015293; GO:0010035; GO:0009986; GO:0009611; GO:0009449; GO:0009416; GO:0007605; GO:0007268; GO:0006835; GO:…
chr7:149244244-149321898	ZNF767	NR_027789	9.36692	7.2846	1.28585	0.982422
chr14:50779046-50789743	ATP5S	NR_033761	11.1819	8.69829	1.28553	0.982422			GO:0045263; GO:0016020; GO:0015992; GO:0015078; GO:0006811; GO:0006754; GO:0005743; GO:0005739
chr21:42547157-42557166	PLAC4	NM_182832	0.679835	0.528837	1.28553	1		placenta-specific 4
chr8:146228196-146231432	C8orf77	NR_026974	1.46518	1.13975	1.28553	1
chr12:3722055-3862394	EFCAB4B	NM_001144958	29.4342	22.8966	1.28553	0.961793			GO:0051928; GO:0032237; GO:0006811; GO:0005794; GO:0005737; GO:0005730; GO:0005634; GO:0005515; GO:0005509; GO:0002115
chr14:64699746-64805268	ESR2	NM_001040276	0.991447	0.771238	1.28553	1			GO:0060766; GO:0060743; GO:0060740; GO:0060068; GO:0060065; GO:0050680; GO:0048019; GO:0046872; GO:0043565; GO:0043401; GO:0043065; GO:0030522; GO:0030520; GO:0030308; GO:0030284; GO:0019899; GO:0010467; GO:0009968; GO:0008270; GO:0007420; GO:0007267; GO:0007165; GO:0006355; GO:0005739; GO:0005654; GO:0005634; GO:0005515; GO:0005496; GO:0004879; GO:0004872; GO:0003713; GO:0003707; GO:0003700; GO:…
chr1:151672533-151689290	TNRC4	NM_007185	0.404235	0.314451	1.28553	1			GO:0048026; GO:0030317; GO:0008380; GO:0007283; GO:0005737; GO:0005634; GO:0003729; GO:0003723; GO:0003676; GO:0000398; GO:0000381; GO:0000166
chr15:56922373-57025796	ZNF280D	NM_017661	18.8245	14.6504	1.28491	0.977825			GO:0046872; GO:0008270; GO:0006355; GO:0005634; GO:0005622; GO:0003677
chr9:130882963-130890712	PTGES2	NR_027811	387.809	301.87	1.28469	0.917269	ko00590		GO:0050220; GO:0048471; GO:0046903; GO:0045893; GO:0045454; GO:0016853; GO:0016021; GO:0016020; GO:0015035; GO:0009055; GO:0006633; GO:0005829; GO:0005794; GO:0005739; GO:0005737; GO:0005634; GO:0003677; GO:0001516; GO:0000139
chr7:139106905-139112272	LOC100129148	NR_033999	129.922	101.141	1.28456	0.96202
chr14:73569441-73588076	RBM25	NM_021239	151.832	118.233	1.28418	0.929457	ko03040		GO:0016607; GO:0008380; GO:0006915; GO:0006397; GO:0005737; GO:0005730; GO:0005634; GO:0005515; GO:0003729; GO:0003676; GO:0000381; GO:0000166
chr5:148873818-148931007	CSNK1A1	NM_001892	199.858	155.897	1.28199	0.921972	ko04310; ko04340		GO:0051301; GO:0016607; GO:0016055; GO:0007166; GO:0007165; GO:0007067; GO:0007049; GO:0006468; GO:0005856; GO:0005847; GO:0005829; GO:0005813; GO:0005737; GO:0005694; GO:0005634; GO:0005524; GO:0005515; GO:0004674; GO:0004672; GO:0000777; GO:0000166
chr15:34517190-34629961	TMEM85	NM_016454	300.35	234.353	1.28161	0.930604			GO:0016021; GO:0016020; GO:0006915
chr16:2570362-2594077	AMDHD2	NM_015944	48.507	37.8755	1.2807	0.964466	ko00520		GO:0016810; GO:0008448; GO:0006044; GO:0005975
chr9:5629043-5776575	KIAA1432	NM_020829	39.6138	30.932	1.28067	0.95035			GO:0016021; GO:0016020
chr1:100315639-100329966	AGL	NM_000028	68.3836	53.4044	1.28049	0.973105	ko00500	amylo-alpha-1, 6-glucosidase, 4-alpha-glucanotransferase	GO:0051384; GO:0043169; GO:0043033; GO:0031593; GO:0030247; GO:0016798; GO:0016757; GO:0016529; GO:0016234; GO:0009725; GO:0007584; GO:0006006; GO:0005980; GO:0005978; GO:0005975; GO:0005829; GO:0005737; GO:0005730; GO:0005634; GO:0005625; GO:0005529; GO:0005515; GO:0004135; GO:0004134; GO:0004133
chr8:144898546-144911196	PUF60	NM_078480	1066.62	833.089	1.28032	0.914592	ko03040		GO:0030529; GO:0019907; GO:0008380; GO:0006915; GO:0006397; GO:0006355; GO:0005730; GO:0005634; GO:0005515; GO:0003723; GO:0003677; GO:0000166
chr6:44796468-45345783	SUPT3H	NM_003599	25.6443	20.0303	1.28028	0.973422		suppressor of Ty 3 homolog (S. cerevisiae)	GO:0045893; GO:0043966; GO:0033276; GO:0030914; GO:0016578; GO:0006366; GO:0006357; GO:0006355; GO:0006352; GO:0005730; GO:0005634; GO:0004402; GO:0003713; GO:0003677
chr1:28157292-28178183	PPP1R8	NM_138558	203.584	159.089	1.27969	0.939196			GO:0050790; GO:0016787; GO:0016607; GO:0008995; GO:0008599; GO:0008380; GO:0008283; GO:0006401; GO:0006397; GO:0006355; GO:0005737; GO:0005730; GO:0005681; GO:0005634; GO:0005515; GO:0004865; GO:0004519; GO:0003723; GO:0003677
chr6:30294952-30311506	TRIM39	NM_021253	19.3988	15.1641	1.27926	0.971374			GO:0046872; GO:0042802; GO:0008270; GO:0008150; GO:0006915; GO:0005829; GO:0005739; GO:0005737; GO:0005622; GO:0005575; GO:0005515; GO:0003674
chr19:41103075-41135799	LTBP4	NM_001042544	33.2135	25.9711	1.27886	0.96202			GO:0050431; GO:0046879; GO:0045595; GO:0031012; GO:0030252; GO:0030162; GO:0017015; GO:0007275; GO:0006457; GO:0005615; GO:0005578; GO:0005576; GO:0005539; GO:0005509; GO:0005488; GO:0005178; GO:0005024; GO:0001558
chr16:88693692-88698372	ZC3H18	NM_144604	105.289	82.3483	1.27858	0.962011			GO:0046872; GO:0008270; GO:0005730; GO:0005634; GO:0003676
chr7:73095247-73097781	DNAJC30	NM_032317	43.846	34.2928	1.27858	0.967201			GO:0051082; GO:0031072; GO:0006457; GO:0005739
chr17:411907-618098	VPS53	NM_001128159	25.2646	19.7648	1.27826	0.976652			GO:0016020; GO:0015031; GO:0010008; GO:0005794; GO:0005768
chr15:75639330-75647685	NEIL1	NM_024608	30.4284	23.8189	1.27749	0.971357	ko00643; ko00460		GO:0032074; GO:0019104; GO:0016829; GO:0016798; GO:0008270; GO:0008022; GO:0006979; GO:0006289; GO:0006284; GO:0005737; GO:0005634; GO:0003906; GO:0003684
chr19:14599757-14600691	LOC100130932	NM_001146693	380.392	298.189	1.27567	0.950617			GO:0008380; GO:0006397; GO:0005681; GO:0005634; GO:0003723
chr1:212276179-212278175	DTL	NM_016448	38.4125	30.1217	1.27524	0.971916			GO:0051726; GO:0031965; GO:0031572; GO:0031465; GO:0031464; GO:0019985; GO:0016020; GO:0009411; GO:0006974; GO:0006513; GO:0006511; GO:0006260; GO:0005856; GO:0005813; GO:0005737; GO:0005634; GO:0005515; GO:0004842; GO:0000209
chr16:6069131-7763340	A2BP1	NM_018723	0.486133	0.381271	1.27503	1			GO:0050658; GO:0008380; GO:0008022; GO:0006397; GO:0005802; GO:0005737; GO:0005634; GO:0005515; GO:0003723; GO:0000166
chr22:38005046-38029571	GGA1	NM_001172688	142.186	111.674	1.27322	0.93952	ko04142		GO:0044431; GO:0030131; GO:0016192; GO:0016020; GO:0010008; GO:0006886; GO:0005794; GO:0005768; GO:0005515; GO:0003674
chr19:41937222-41945843	ATP5SL	NM_001167867	282.533	221.967	1.27286	0.943335
chr4:164046670-164088073	NAF1	NM_001128931	40.8604	32.1477	1.27102	0.968354			GO:0042254; GO:0031120; GO:0030515; GO:0030054; GO:0006364; GO:0005813; GO:0005737; GO:0005732; GO:0005634; GO:0005515; GO:0003723
chr15:90439763-90456222	C15orf38	NM_182616	33.2097	26.1302	1.27093	0.965656
chr10:27443666-27475848	MASTL	NM_001172303	33.2478	26.2196	1.26805	0.968354			GO:0051726; GO:0051721; GO:0051301; GO:0034048; GO:0032154; GO:0016310; GO:0016301; GO:0007067; GO:0006974; GO:0005856; GO:0005813; GO:0005737; GO:0005634; GO:0005524; GO:0004674; GO:0000166; GO:0000086
chr16:31470169-31478488	ARMC5	NM_001105247	29.6862	23.4176	1.26769	0.965448			GO:0005488
chr2:220026180-220034884	SLC23A3	NM_001144890	10.5754	8.34292	1.26759	0.980056			GO:0055085; GO:0016021; GO:0016020; GO:0005215
chr19:1753492-1777742	ONECUT3	NM_001080488	69.1078	54.5191	1.26759	0.957141		one cut homeobox 3	GO:0043565; GO:0031018; GO:0006357; GO:0005667; GO:0005634; GO:0003700
chr5:111496222-111500397	NCRNA00219	NR_015370	47.3646	37.3863	1.2669	0.964634			GO:0031966; GO:0016021; GO:0016020; GO:0005739
chr6:10671650-10694839	C6orf52	NR_026736	20.5288	16.2157	1.26598	0.989075
chr3:187868993-187871876	LOC339929	NR_036497	3.97952	3.14454	1.26553	1
chr19:48283012-48287944	SEPW1	NM_003009	313.876	248.186	1.26468	0.942754			GO:0045454; GO:0016209; GO:0008430; GO:0005737
chr7:44866487-44887725	H2AFV	NM_138635	115.817	91.6263	1.26401	0.945023	ko05322		GO:0006334; GO:0005694; GO:0005634; GO:0003677; GO:0000786
chr7:148504474-148581416	EZH2	NM_004456	128.507	101.679	1.26385	0.951597			GO:0048387; GO:0045892; GO:0042054; GO:0035098; GO:0018024; GO:0016740; GO:0016571; GO:0016568; GO:0008168; GO:0006355; GO:0006325; GO:0005634; GO:0005515; GO:0003677
chr2:202937977-203061773	FLJ39061	XR_108418	14.8109	11.7222	1.26349	0.973558
chr1:145507995-145508613	RBM8A	NM_005105	408.696	323.539	1.2632	0.96449	ko03040; ko03013		GO:0071013; GO:0035145; GO:0031124; GO:0016607; GO:0016071; GO:0016070; GO:0010467; GO:0008380; GO:0006810; GO:0006417; GO:0006406; GO:0006369; GO:0006366; GO:0005829; GO:0005737; GO:0005730; GO:0005654; GO:0005634; GO:0005515; GO:0003729; GO:0003723; GO:0000398; GO:0000184; GO:0000166
chr11:46368955-46402104	DGKZ	NM_001105540	78.5594	62.2145	1.26272	0.957392	ko04070; ko00561; ko00564		GO:0046872; GO:0046834; GO:0046580; GO:0045930; GO:0035556; GO:0031571; GO:0030168; GO:0030027; GO:0016740; GO:0016477; GO:0008022; GO:0007596; GO:0007205; GO:0005886; GO:0005737; GO:0005634; GO:0005524; GO:0005515; GO:0004857; GO:0004143; GO:0001727; GO:0000166
chr8:23386362-23431727	SLC25A37	NM_016612	104.946	83.1522	1.2621	0.950617			GO:0055072; GO:0016021; GO:0016020; GO:0006811; GO:0005743; GO:0005739
chr4:2073644-2243897	POLN	NM_181808	7.07986	5.61149	1.26167	0.976995		polymerase (DNA directed) nu	GO:0016779; GO:0016740; GO:0006281; GO:0006260; GO:0005634; GO:0003887; GO:0003677
chr11:111473160-111637169	PPP2R1B	NM_181699	51.4448	40.8084	1.26064	0.976652	ko04113; ko04111; ko05160; ko04530; ko04310; ko04350; ko05142; ko04730; ko04114	protein phosphatase 2, regulatory subunit A, beta	GO:0005515
chr10:81664653-81682875	LOC100288974	NR_033857	16.9358	13.4355	1.26053	0.982422
chr5:6746100-6757161	PAPD7	NM_006999	82.2747	65.2744	1.26044	0.958211	ko03018		GO:0051301; GO:0046872; GO:0043221; GO:0042493; GO:0016779; GO:0016740; GO:0007076; GO:0007067; GO:0007062; GO:0007049; GO:0006302; GO:0006260; GO:0005634; GO:0003887; GO:0003677
chr19:12810007-12833513	TNPO2	NM_001136195	209.48	166.252	1.26001	0.930604			GO:0008565; GO:0008139; GO:0006886; GO:0005737; GO:0005634; GO:0005488
chr12:121746047-121790265	ANAPC5	NM_016237	338.64	269.263	1.25766	0.935139	ko04120; ko04113; ko04111; ko04914; ko04110; ko04114		GO:0070979; GO:0051439; GO:0051437; GO:0051436; GO:0051301; GO:0031145; GO:0019903; GO:0016567; GO:0007094; GO:0006511; GO:0005829; GO:0005680; GO:0005654; GO:0005634; GO:0005488; GO:0004842; GO:0000278; GO:0000090; GO:0000086; GO:0000075
chr7:143087425-143105985	EPHA1	NM_005232	135.272	107.619	1.25695	0.942042	ko04360		GO:0051496; GO:0046777; GO:0045766; GO:0034446; GO:0032862; GO:0032314; GO:0030336; GO:0030335; GO:0019901; GO:0018108; GO:0008284; GO:0007166; GO:0007155; GO:0006469; GO:0005887; GO:0005886; GO:0005524; GO:0005005; GO:0004872; GO:0004672; GO:0001954; GO:0000166
chr13:111267878-111292343	CARKD	NM_018210	80.6385	64.1776	1.25649	0.958832			GO:0008150; GO:0005575; GO:0003674
chr1:3371146-3397677	ARHGEF16	NM_014448	63.2588	50.3522	1.25633	0.962949			GO:0090004; GO:0060326; GO:0051056; GO:0048011; GO:0035023; GO:0032864; GO:0032863; GO:0030971; GO:0030165; GO:0017048; GO:0008624; GO:0007264; GO:0006915; GO:0005829; GO:0005737; GO:0005622; GO:0005515; GO:0005089; GO:0005085
chr11:111473160-111637169	SIK2	NM_015191	33.7997	26.9239	1.25538	0.96202			GO:0046777; GO:0046626; GO:0007243; GO:0006468; GO:0005794; GO:0005737; GO:0005634; GO:0005524; GO:0005515; GO:0004674; GO:0000287; GO:0000166
chr9:114980714-115095956	ROD1	NM_001163790	66.1866	52.7511	1.2547	0.94596			GO:0033119; GO:0009653; GO:0006397; GO:0005634; GO:0003723; GO:0000166
chr2:58273776-58387294	VRK2	NM_001130483	49.9449	39.8105	1.25457	0.972006			GO:2000659; GO:0046777; GO:0044419; GO:0043408; GO:0031966; GO:0016021; GO:0016020; GO:0006979; GO:0006468; GO:0005789; GO:0005783; GO:0005739; GO:0005737; GO:0005634; GO:0005524; GO:0005515; GO:0004674; GO:0000166
chr19:1085168-1095394	POLR2E	NM_002695	351.597	280.694	1.2526	0.932754	ko05016; ko00230; ko00240; ko03020		GO:0050434; GO:0044419; GO:0016032; GO:0010467; GO:0008380; GO:0006468; GO:0006386; GO:0006385; GO:0006383; GO:0006370; GO:0006368; GO:0006367; GO:0006366; GO:0006289; GO:0006283; GO:0006281; GO:0005665; GO:0005654; GO:0005634; GO:0005515; GO:0004672; GO:0003899; GO:0003677; GO:0000398
chr11:66129991-66139291	SLC29A2	NM_001532	145.443	116.121	1.25251	0.950171			GO:0055086; GO:0055085; GO:0035364; GO:0035344; GO:0032869; GO:0031965; GO:0016323; GO:0015862; GO:0015858; GO:0015854; GO:0015853; GO:0008283; GO:0007595; GO:0006139; GO:0005887; GO:0005886; GO:0005730; GO:0005634; GO:0005337
chr1:113459597-113460670	SLC16A1	NM_001166496	318.114	254.21	1.25138	0.959467			GO:0055085; GO:0050900; GO:0016021; GO:0015728; GO:0015718; GO:0015711; GO:0015355; GO:0015293; GO:0015130; GO:0008028; GO:0007596; GO:0006090; GO:0005886; GO:0005739; GO:0005624
chr16:88925771-88927520	TRAPPC2L	NM_016209	417.37	334.49	1.24778	0.96502			GO:0048471; GO:0016192; GO:0006888; GO:0005794; GO:0005783; GO:0005737; GO:0005622
chr12:51632507-51640501	DAZAP2	NM_001136264	301.166	241.395	1.24761	0.961583			GO:0050699; GO:0005515
chr21:46359911-46399151	C21orf70	NM_058190	85.7798	68.7837	1.24709	0.96202
chr11:71791381-71821828	LRTOMT	NM_001145309	62.4963	50.1807	1.24543	0.965448			GO:0060117; GO:0042424; GO:0042135; GO:0016740; GO:0016206; GO:0016021; GO:0016020; GO:0007605; GO:0005737; GO:0005575
chr20:2821372-3019315	PTPRA	NM_002836	79.8811	64.2201	1.24386	0.964263			GO:0035335; GO:0016787; GO:0008286; GO:0007411; GO:0006468; GO:0005887; GO:0005886; GO:0005001; GO:0004872; GO:0004725
chr1:1321090-1334735	CCNL2	NM_030937	123.544	99.3534	1.24348	0.945532			GO:0019901; GO:0016607; GO:0006396; GO:0006355; GO:0005634; GO:0000079
chr12:1100403-1605099	ERC1	NR_027948	12.4104	9.9822	1.24325	0.0135881			GO:0051092; GO:0045768; GO:0043522; GO:0042734; GO:0042147; GO:0030165; GO:0017137; GO:0016020; GO:0015031; GO:0008385; GO:0007275; GO:0007252; GO:0006355; GO:0005794; GO:0005737; GO:0005515; GO:0000139
chr3:170779301-171178272	TNIK	NM_001161562	53.9878	43.4946	1.24125	0.958832			GO:0055037; GO:0048814; GO:0046777; GO:0031532; GO:0016055; GO:0007399; GO:0007256; GO:0007243; GO:0007010; GO:0006950; GO:0006468; GO:0005856; GO:0005737; GO:0005730; GO:0005634; GO:0005524; GO:0005515; GO:0005083; GO:0004674; GO:0000166
chr19:17420271-17435481	DDA1	NM_024050	85.638	69.1217	1.23895	0.954778
chr7:64434829-64467124	ZNF117	NM_015852	6.94763	5.60782	1.23892	0.978773			GO:0046872; GO:0008270; GO:0006355; GO:0005634; GO:0005622; GO:0003700; GO:0003677
chr6:28109641-28127236	ZNF192	NM_006298	36.5591	29.5144	1.23869	0.962227			GO:0046872; GO:0016032; GO:0008270; GO:0005737; GO:0005730; GO:0005634; GO:0005622; GO:0003700; GO:0003677
chr15:38746290-38778355	FAM98B	NM_173611	132.181	106.809	1.23755	0.959358		family with sequence similarity 98, member B	GO:0072669
chr2:114647520-114647901	ACTR3	NM_005721	1940.71	1570.15	1.236	0.961216			GO:0060271; GO:0060076; GO:0051491; GO:0050775; GO:0046677; GO:0045666; GO:0043519; GO:0030838; GO:0030056; GO:0030030; GO:0030027; GO:0015629; GO:0010592; GO:0009743; GO:0006928; GO:0005885; GO:0005884; GO:0005737; GO:0005524; GO:0005515; GO:0003779; GO:0002102; GO:0000166; GO:0000139
chr10:99496877-99520664	ZFYVE27	NM_144588	59.4894	48.1793	1.23475	0.969736			GO:0072659; GO:0055038; GO:0048011; GO:0046872; GO:0042995; GO:0032584; GO:0031175; GO:0030425; GO:0030424; GO:0016021; GO:0008219; GO:0005886; GO:0005789; GO:0005783; GO:0005768; GO:0005515
chr15:41624925-41673248	NUSAP1	NM_016359	270.6	219.234	1.2343	0.951303			GO:0051301; GO:0045840; GO:0040001; GO:0007076; GO:0007049; GO:0005874; GO:0005856; GO:0005819; GO:0005737; GO:0005730; GO:0005694; GO:0005634; GO:0003677; GO:0000281; GO:0000070
chr15:100884661-100890923	FLJ42289	NR_028140	1.10175	0.892752	1.23411	1
chr11:9041046-9113150	SCUBE2	NM_020974	0.660168	0.534937	1.2341	1			GO:0005576; GO:0005509
chr16:2097980-2185933	PKD1	NM_001009944	82.5313	66.9023	1.23361	0.943782			GO:0050982; GO:0048754; GO:0034220; GO:0031512; GO:0019904; GO:0019901; GO:0018105; GO:0016323; GO:0009653; GO:0007507; GO:0007259; GO:0007218; GO:0007161; GO:0007160; GO:0007156; GO:0007050; GO:0006816; GO:0006812; GO:0006611; GO:0005929; GO:0005887; GO:0005886; GO:0005634; GO:0005529; GO:0005515; GO:0005261; GO:0002133; GO:0001701; GO:0001568; GO:0001502
chr7:86781676-86849107	DMTF1	NM_021145	42.1593	34.186	1.23323	0.973105			GO:0007049; GO:0006355; GO:0005737; GO:0005730; GO:0005634; GO:0003700; GO:0003677
chr5:74666927-74807806	COL4A3BP	NM_001130105	23.8703	19.3974	1.23059	0.976652			GO:0097001; GO:0070584; GO:0070273; GO:0055088; GO:0048471; GO:0035621; GO:0034976; GO:0008283; GO:0007165; GO:0007029; GO:0006955; GO:0006936; GO:0006869; GO:0006810; GO:0006672; GO:0006665; GO:0006468; GO:0005829; GO:0005794; GO:0005789; GO:0005783; GO:0005739; GO:0005737; GO:0005730; GO:0005634; GO:0005515; GO:0004672; GO:0003007; GO:0001701; GO:0000902
chr3:10047201-10052779	LOC401052	NM_001008737	9.42204	7.66248	1.22963	0.983098
chr1:1287371-1293915	MXRA8	NM_032348	7.86375	6.39803	1.22909	0.98439			GO:0016021; GO:0016020
chr8:144718372-144736887	ZNF623	NM_001082480	36.1601	29.4349	1.22848	0.971374		zinc finger protein 623	GO:0046872; GO:0008270; GO:0006355; GO:0005634; GO:0005622; GO:0003677
chr2:110656008-110726151	LIMS3-LOC440895	NR_027145	13.5224	11.0126	1.2279	0.982422
chr6:34254831-34360559	NUDT3	NM_006703	109.359	89.1168	1.22714	0.965448			GO:0071544; GO:0052848; GO:0052847; GO:0052846; GO:0052845; GO:0052844; GO:0052843; GO:0052840; GO:0016787; GO:0015961; GO:0008486; GO:0007267; GO:0005737; GO:0000287
chr6:86317501-86353043	SYNCRIP	NM_001159677	294.793	240.327	1.22663	0.95035			GO:0071204; GO:0071013; GO:0070937; GO:0070934; GO:0044419; GO:0030529; GO:0008380; GO:0006396; GO:0005792; GO:0005783; GO:0005737; GO:0005654; GO:0005634; GO:0005515; GO:0003723; GO:0000398; GO:0000166
chr4:83739813-83812419	SEC31A	NM_014933	63.1182	51.4607	1.22653	0.968862	ko04141		GO:0051592; GO:0048471; GO:0048306; GO:0048208; GO:0044267; GO:0043687; GO:0043231; GO:0031410; GO:0030127; GO:0018279; GO:0016192; GO:0016044; GO:0016020; GO:0015031; GO:0012507; GO:0006888; GO:0005829; GO:0005789; GO:0005783; GO:0005768; GO:0005737; GO:0005515; GO:0002474
chr10:120801502-120802287	EIF3A	NM_003750	1720.05	1402.42	1.22649	0.948548	ko03013		GO:0044267; GO:0010467; GO:0006413; GO:0006412; GO:0005852; GO:0005829; GO:0005737; GO:0005730; GO:0005634; GO:0005515; GO:0005198; GO:0003743; GO:0001732
chr7:128116782-128143069	METTL2B	NM_018396	81.025	66.0661	1.22642	0.970751	ko00350; ko00340; ko00450; ko00624		GO:0016740; GO:0008168
chr14:92524895-92572965	ATXN3	NR_028457	8.36351	6.82118	1.22611	0.980056	ko04141		GO:0045104; GO:0030036; GO:0016363; GO:0010810; GO:0008242; GO:0008234; GO:0008233; GO:0008219; GO:0007399; GO:0007268; GO:0006508; GO:0006355; GO:0006289; GO:0005737; GO:0005654; GO:0005634; GO:0005515; GO:0000226
chr4:1894508-1950545	WHSC1	NM_133330	40.4773	33.0153	1.22602	0.96202	ko00310		GO:0046872; GO:0031965; GO:0018024; GO:0016740; GO:0016568; GO:0009653; GO:0008270; GO:0008168; GO:0006355; GO:0005737; GO:0005730; GO:0005694; GO:0005634; GO:0003677
chr6:31802692-31807541	C6orf48	NM_001040437	726.611	592.684	1.22597	0.957392
chr15:63338019-63364114	TPM1	NM_001018004	8.65639	7.06614	1.22505	0.991478	ko05414; ko04260; ko05410		GO:0060048; GO:0055010; GO:0051496; GO:0045785; GO:0045214; GO:0042060; GO:0034614; GO:0032781; GO:0032587; GO:0032059; GO:0031529; GO:0030336; GO:0030049; GO:0030017; GO:0015629; GO:0008307; GO:0008016; GO:0007010; GO:0006937; GO:0006936; GO:0006928; GO:0005862; GO:0005856; GO:0005829; GO:0005737; GO:0005200; GO:0003779; GO:0003065; GO:0001725
chr7:134844644-134855579	C7orf49	NR_024186	52.4163	42.8417	1.22349	0.96202			GO:0005737
chr11:62619459-62623405	SNHG1	NR_003098	274.378	224.537	1.22197	0.96202		small nucleolar RNA host gene 1 (non-protein coding)
chr1:33283175-33300665	S100PBP	NM_022753	41.5562	34.0098	1.22189	0.980056			GO:0048306; GO:0005634
chr1:24295567-24306953	SFRS13A	NR_034035	112.361	91.9979	1.22134	0.96202			GO:0051082; GO:0050733; GO:0048025; GO:0016607; GO:0016482; GO:0006406; GO:0006376; GO:0006355; GO:0005737; GO:0005654; GO:0005634; GO:0005515; GO:0003723; GO:0003676; GO:0000398; GO:0000375; GO:0000244; GO:0000166
chr22:39257470-39268304	CBX6	NM_014292	261.08	213.793	1.22118	0.949791			GO:0031519; GO:0016568; GO:0006355; GO:0005634; GO:0005515; GO:0003727; GO:0000792; GO:0000122
chr1:101361631-101447311	SLC30A7	NM_001144884	13.9093	11.398	1.22033	0.977825			GO:0055085; GO:0048471; GO:0044444; GO:0032119; GO:0031982; GO:0016023; GO:0016021; GO:0016020; GO:0008324; GO:0006829; GO:0005794; GO:0000139
chr22:29663997-29696515	EWSR1	NM_013986	644.989	528.847	1.21961	0.950617			GO:0046872; GO:0008270; GO:0006355; GO:0005886; GO:0005737; GO:0005634; GO:0005622; GO:0005516; GO:0005515; GO:0003723; GO:0003676; GO:0000166
chr17:30771427-30809839	PSMD11	NM_002815	235.942	193.512	1.21926	0.956299	ko03050		GO:0051439; GO:0051437; GO:0051436; GO:0042981; GO:0034641; GO:0031145; GO:0016071; GO:0016070; GO:0016032; GO:0006977; GO:0006915; GO:0006521; GO:0005829; GO:0005654; GO:0002474; GO:0000502; GO:0000278; GO:0000216; GO:0000209; GO:0000084; GO:0000082; GO:0000075
chrX:48755538-48760422	PQBP1	NM_001032383	195.764	160.64	1.21865	0.97924	ko03040		GO:0006355; GO:0005737; GO:0005730; GO:0005634; GO:0003713; GO:0003677
chr1:243651534-243663307	AKT3	NM_181690	70.3197	57.7401	1.21787	0.987079	ko04664; ko04620; ko05218; ko05200; ko04062; ko05213; ko04722; ko04660; ko05145; ko04012; ko05210; ko04530; ko04210; ko05211; ko05222; ko05212; ko05221; ko05223; ko04630; ko05220; ko05215; ko04010; ko04666; ko04662; ko05214; ko04920; ko04910; ko05142; ko04510; ko04973; ko05160; ko04150; ko04914; ko04370		GO:0007165; GO:0006468; GO:0005886; GO:0005794; GO:0005737; GO:0005730; GO:0005634; GO:0005524; GO:0005515; GO:0004674; GO:0004672; GO:0000166; GO:0000002
chr19:10217070-10226065	PPAN-P2RY11	NM_001040664	213.957	175.709	1.21768	0.958832
chr14:76618254-76670337	C14orf118	NM_017926	42.0239	34.5295	1.21704	0.976652
chrX:100354797-100418686	CENPI	NM_006733	14.0501	11.5492	1.21654	0.982422			GO:0042699; GO:0034080; GO:0007548; GO:0006334; GO:0005829; GO:0005694; GO:0005654; GO:0005634; GO:0005515; GO:0000776; GO:0000278; GO:0000236; GO:0000087
chr7:72715062-72722864	NSUN5	NM_148956	239.797	197.222	1.21587	0.956758			GO:0016740; GO:0008168
chr12:125478186-125511275	BRI3BP	NM_080626	118.081	97.1201	1.21582	0.969736			GO:0016021; GO:0016020; GO:0005741; GO:0005739
chr2:38975980-38978636	SFRS7	NM_001031684	752.6	619.037	1.21576	0.956758			GO:0048025; GO:0046872; GO:0031124; GO:0010467; GO:0008380; GO:0008270; GO:0006406; GO:0006397; GO:0006369; GO:0006366; GO:0005730; GO:0005654; GO:0005634; GO:0005515; GO:0003723; GO:0000398; GO:0000166
chr1:150595753-150601609	ENSA	NM_207042	125.806	103.535	1.21511	0.965448			GO:0051721; GO:0051301; GO:0019212; GO:0008601; GO:0008200; GO:0007584; GO:0007067; GO:0007049; GO:0006810; GO:0005737; GO:0005102; GO:0004864; GO:0000086
chr6:139225619-139309477	REPS1	NM_031922	99.7469	82.1367	1.2144	0.965448			GO:0017124; GO:0005905; GO:0005886; GO:0005515; GO:0005509
chr22:51113069-51162350	SHANK3	NM_001080420	30.4068	25.0514	1.21378	0.976104		SH3 and multiple ankyrin repeat domains 3	GO:2000969; GO:2000822; GO:2000463; GO:0097110; GO:0097107; GO:0071625; GO:0060997; GO:0051968; GO:0051835; GO:0048854; GO:0048170; GO:0045794; GO:0045211; GO:0045202; GO:0044309; GO:0035641; GO:0035255; GO:0035176; GO:0030160; GO:0030054; GO:0021773; GO:0017124; GO:0014069; GO:0008022; GO:0005886; GO:0005737; GO:0005515
chr6:30261489-30294927	HCG18	NR_024052	41.8514	34.5108	1.2127	0.979854
chr2:105881904-105946148	TGFBRAP1	NM_001142621	62.678	51.7057	1.21221	0.968354			GO:0046332; GO:0016192; GO:0016020; GO:0007179; GO:0007165; GO:0006886; GO:0006355; GO:0005737; GO:0005515; GO:0005160; GO:0005083
chr9:93564011-93660842	SYK	NM_003177	13.5589	11.1892	1.21178	0.980056	ko04664; ko04650; ko04666; ko04662		GO:0090330; GO:0090237; GO:0071226; GO:0070372; GO:0050853; GO:0050850; GO:0050764; GO:0050731; GO:0048514; GO:0046777; GO:0046641; GO:0046638; GO:0045780; GO:0045588; GO:0045579; GO:0045425; GO:0045401; GO:0045087; GO:0044419; GO:0043366; GO:0043313; GO:0043306; GO:0042742; GO:0042101; GO:0035556; GO:0033630; GO:0032928; GO:0032009; GO:0030593; GO:0030168; GO:0019904; GO:0019901; GO:0019815; GO:…
chr1:53704027-53793821	LRP8	NM_033300	15.7558	13.0064	1.21139	0.980056			GO:0045860; GO:0034187; GO:0030229; GO:0030168; GO:0021819; GO:0021766; GO:0019221; GO:0016021; GO:0007596; GO:0007165; GO:0006897; GO:0006629; GO:0006508; GO:0005901; GO:0005886; GO:0005615; GO:0005576; GO:0005515; GO:0005509; GO:0004888; GO:0004872
chr10:13628938-13697929	PRPF18	NM_003675	26.7524	22.1111	1.20991	0.980056	ko03040		GO:0019870; GO:0016607; GO:0008380; GO:0006397; GO:0005681; GO:0005634
chr2:152266396-152333931	RIF1	NM_018151	27.5817	22.7987	1.20979	0.969517			GO:0007049; GO:0006974; GO:0005856; GO:0005819; GO:0005737; GO:0005694; GO:0005634; GO:0005488; GO:0000781
chr21:44268255-44299678	WDR4	NM_018669	61.0815	50.4989	1.20956	0.976652			GO:0008176; GO:0006400; GO:0005737; GO:0005654; GO:0005634; GO:0005515
chr4:1717678-1719855	TMEM129	NM_001127266	61.6958	51.0608	1.20828	0.978912			GO:0016021; GO:0016020; GO:0008150; GO:0005575; GO:0003674
chr10:51371378-51734610	TIMM23B	XM_003118952	108.358	89.6908	1.20813	0.97171			GO:0016021; GO:0016020; GO:0015450; GO:0008150; GO:0006886; GO:0005744; GO:0005739; GO:0005575; GO:0003674
chr14:91923933-91976954	SMEK1	NM_032560	70.1216	58.0497	1.20796	0.968354			GO:0005856; GO:0005815; GO:0005737; GO:0005634; GO:0005488
chr5:176946789-176981580	FAM193B	NR_024019	35.7526	29.6093	1.20748	0.979566
chr4:1005609-1020686	FGFRL1	NM_001004356	327.511	271.369	1.20688	0.958708			GO:0060539; GO:0060412; GO:0017134; GO:0016021; GO:0008543; GO:0008285; GO:0008201; GO:0006468; GO:0005886; GO:0005007; GO:0004872; GO:0003179; GO:0001558; GO:0001501
chr10:98592711-98724198	LCOR	NM_001170766	20.69	17.144	1.20684	0.977825			GO:0008134; GO:0005634; GO:0003700; GO:0003677; GO:0000122
chr19:40575058-40596854	ZNF780A	NM_001142579	0.860062	0.712689	1.20678	1			GO:0046872; GO:0008270; GO:0006355; GO:0005634; GO:0005622; GO:0003677
chr2:122095351-122407207	CLASP1	NM_015282	53.9393	44.7111	1.2064	0.96502			GO:0051301; GO:0051010; GO:0043515; GO:0034453; GO:0031592; GO:0031111; GO:0031023; GO:0030981; GO:0010458; GO:0008017; GO:0007411; GO:0007163; GO:0007026; GO:0007020; GO:0005938; GO:0005881; GO:0005876; GO:0005856; GO:0005829; GO:0005828; GO:0005813; GO:0005794; GO:0005737; GO:0005694; GO:0005515; GO:0001578; GO:0000777; GO:0000776; GO:0000278; GO:0000236; GO:0000226; GO:0000087; GO:0000086
chr9:37485939-37504390	POLR1E	NM_022490	149.005	123.585	1.20569	0.967686	ko00230; ko00240; ko03020	polymerase (RNA) I polypeptide E, 53kDa	GO:0030054; GO:0009303; GO:0005737; GO:0005730; GO:0005634; GO:0003899; GO:0003677
chr18:47339842-47340891	SCARNA17	NR_003003	68.2623	56.6747	1.20446	0.982422
chr11:63606399-63678498	MARK2	NM_001039469	2.88229	2.39376	1.20408	1			GO:0051493; GO:0050770; GO:0050321; GO:0046777; GO:0045197; GO:0045180; GO:0030154; GO:0030010; GO:0016301; GO:0016055; GO:0016020; GO:0010976; GO:0008289; GO:0007275; GO:0007243; GO:0006979; GO:0006468; GO:0005886; GO:0005737; GO:0005634; GO:0005524; GO:0005515; GO:0004674; GO:0001764; GO:0000287; GO:0000166
chr1:43888796-43919815	KIAA0467	NM_015284	15.363	12.7599	1.20401	0.977825			GO:0043473; GO:0009791; GO:0007417; GO:0005777
chr1:10490783-10512060	APITD1	NM_198544	39.263	32.6307	1.20325	0.982422
chr22:31740315-31742591	PATZ1	NM_014323	70.9518	58.9863	1.20285	0.978169		POZ (BTB) and AT hook containing zinc finger 1	GO:0046872; GO:0045893; GO:0045892; GO:0030217; GO:0008584; GO:0008270; GO:0007283; GO:0006355; GO:0005634; GO:0005622; GO:0003682; GO:0003677
chr2:74381322-74405995	MOBKL1B	NM_018221	109.991	91.4678	1.20251	0.968683	ko04111	MOB1, Mps One Binder kinase activator-like 1B (yeast)	GO:0046872; GO:0035329; GO:0005515
chr1:45808002-45956854	TESK2	NM_007170	37.3427	31.054	1.20251	0.977825		testis-specific kinase 2	GO:0048041; GO:0046872; GO:0030036; GO:0007283; GO:0006468; GO:0005737; GO:0005730; GO:0005634; GO:0005524; GO:0004713; GO:0004712; GO:0004674; GO:0004672; GO:0000166
chr19:53206065-53238307	ZNF611	NM_030972	7.45092	6.19676	1.20239	0.985399			GO:0046872; GO:0008270; GO:0006355; GO:0005634; GO:0005622; GO:0003677
chr11:71639767-71713574	RNF121	NM_018320	31.8435	26.4878	1.20219	0.977803			GO:0046872; GO:0016021; GO:0016020; GO:0008270
chr12:122688227-122693126	B3GNT4	NM_030765	99.7604	82.9878	1.20211	0.975734	ko00601		GO:0016757; GO:0016021; GO:0016020; GO:0008378; GO:0006486; GO:0005794; GO:0000139
chr5:132387594-132441773	HSPA4	NM_002154	358.163	297.969	1.20201	0.958832	ko04612		GO:0051131; GO:0045040; GO:0032092; GO:0009408; GO:0006986; GO:0006950; GO:0005829; GO:0005811; GO:0005737; GO:0005730; GO:0005634; GO:0005524; GO:0000166
chr9:27546543-27573842	C9orf72	NM_018325	3.72106	3.09595	1.20191	1			GO:0008219; GO:0005737; GO:0005634
chr2:219433296-219461130	RQCD1	NM_005444	145.961	121.46	1.20172	0.965056	ko03018		GO:0019221; GO:0016071; GO:0016070; GO:0007548; GO:0006355; GO:0005829; GO:0005737; GO:0005634; GO:0005488; GO:0000932; GO:0000289; GO:0000288
chr14:24768804-24782776	C14orf21	NM_174913	55.62	46.3158	1.20089	0.965448			GO:0005488; GO:0003723
chr16:86563781-86588841	MTHFSD	NR_027489	39.8397	33.1842	1.20056	0.979854			GO:0030272; GO:0009396; GO:0005524; GO:0003723; GO:0000166
chr12:51487538-51566926	TFCP2	NM_005653	77.5275	64.5789	1.20051	0.973105			GO:0006357; GO:0005634; GO:0005575; GO:0003700; GO:0003677
chr5:65374245-65376171	ERBB2IP	NM_001006600	48.7409	40.6233	1.19983	0.981955	ko04621		GO:0045197; GO:0045175; GO:0045104; GO:0030056; GO:0030054; GO:0016049; GO:0009925; GO:0007229; GO:0007173; GO:0007165; GO:0007155; GO:0007049; GO:0005737; GO:0005634; GO:0005604; GO:0005515; GO:0005200; GO:0005178; GO:0005176
chr2:54531822-54532247	ACYP2	NM_138448	41.9621	34.9735	1.19983	0.990243	ko00627; ko00620	acylphosphatase 2, muscle type	GO:0016787; GO:0006796; GO:0005739; GO:0003998
chr2:99613723-99758120	TSGA10	NM_025244	2.53597	2.11362	1.19982	1			GO:0043005; GO:0031965; GO:0030031; GO:0016020; GO:0009434; GO:0007283; GO:0005737; GO:0005634; GO:0005575; GO:0005198; GO:0003674
chrX:100656094-100663001	GLA	NM_000169	108.456	90.4559	1.19899	0.980056	ko00052; ko04142; ko00561; ko00600; ko00603	galactosidase, alpha	GO:0052692; GO:0051001; GO:0046479; GO:0046477; GO:0045019; GO:0043169; GO:0042803; GO:0016936; GO:0016787; GO:0016139; GO:0009311; GO:0005794; GO:0005764; GO:0005737; GO:0005625; GO:0005576; GO:0005515; GO:0005102; GO:0004557; GO:0004553; GO:0003824
chr15:85185998-85197521	WDR73	NM_032856	87.582	73.0574	1.19881	0.977825		WD repeat domain 73
chr15:40453209-40569688	BUB1B	NM_001211	86.7293	72.3487	1.19877	0.964634	ko04110		GO:0051439; GO:0051436; GO:0051301; GO:0051233; GO:0048471; GO:0048015; GO:0034501; GO:0031145; GO:0008283; GO:0007094; GO:0007093; GO:0007091; GO:0007067; GO:0007051; GO:0007049; GO:0006915; GO:0006468; GO:0005856; GO:0005829; GO:0005815; GO:0005737; GO:0005694; GO:0005680; GO:0005634; GO:0005524; GO:0005515; GO:0004674; GO:0004672; GO:0000940; GO:0000777; GO:0000776; GO:0000278; GO:0000236; GO:…
chr7:150773707-150777951	FASTK	NM_006712	139.878	116.694	1.19867	0.971374			GO:0043484; GO:0033867; GO:0016740; GO:0008624; GO:0006915; GO:0006468; GO:0005739; GO:0005524; GO:0005515; GO:0004674; GO:0004672; GO:0000166
chr2:54785378-54898583	SPTBN1	NM_003128	135.143	112.762	1.19848	0.961183		spectrin, beta, non-erythrocytic 1	GO:0051693; GO:0032437; GO:0031430; GO:0030863; GO:0008091; GO:0007411; GO:0007184; GO:0007182; GO:0005886; GO:0005829; GO:0005737; GO:0005730; GO:0005634; GO:0005516; GO:0005515; GO:0005200; GO:0003779
chr10:7860470-8057468	TAF3	NM_031923	38.1306	31.8324	1.19786	0.979854			GO:0051457; GO:0046872; GO:0043433; GO:0008270; GO:0006355; GO:0005669; GO:0005634; GO:0005515; GO:0002039; GO:0000122
chr20:44462445-44486040	SNX21	NM_152897	17.0327	14.2206	1.19775	0.984628			GO:0035091; GO:0031410; GO:0030659; GO:0016020; GO:0015031; GO:0008289; GO:0007154; GO:0005488
chr19:7991558-8008708	TIMM44	NM_006351	129.164	107.875	1.19735	0.972778			GO:0051087; GO:0016020; GO:0015450; GO:0006886; GO:0006626; GO:0005759; GO:0005744; GO:0005743; GO:0005739; GO:0005524; GO:0005515; GO:0000166
chr10:50723150-50747147	ERCC6	NM_000124	15.0553	12.5846	1.19633	0.983756	ko03420		GO:0047485; GO:0045494; GO:0032786; GO:0032784; GO:0032403; GO:0016787; GO:0010332; GO:0010224; GO:0010165; GO:0009636; GO:0009411; GO:0008630; GO:0008094; GO:0008023; GO:0008022; GO:0007257; GO:0007256; GO:0006979; GO:0006366; GO:0006290; GO:0006289; GO:0006284; GO:0006283; GO:0006281; GO:0005730; GO:0005654; GO:0005634; GO:0005625; GO:0005524; GO:0005515; GO:0003682; GO:0003678; GO:0003677; GO:…
chr3:156422467-156424446	TIPARP	NM_015508	68.0528	56.9275	1.19543	0.980056			GO:0060325; GO:0060021; GO:0048745; GO:0048705; GO:0048008; GO:0046872; GO:0044236; GO:0030097; GO:0016757; GO:0009791; GO:0008585; GO:0008270; GO:0008210; GO:0008209; GO:0006807; GO:0006471; GO:0003950; GO:0003676; GO:0001822; GO:0001570
chr1:228294328-228297033	MRPL55	NM_181462	129.758	108.625	1.19455	0.979854			GO:0006412; GO:0005840; GO:0005762; GO:0005739; GO:0003735
chr12:6759703-6772308	ING4	NM_001127582	41.2228	34.5164	1.1943	0.984406			GO:0046872; GO:0045926; GO:0045892; GO:0043984; GO:0043983; GO:0043982; GO:0043981; GO:0043966; GO:0043065; GO:0035064; GO:0016568; GO:0008285; GO:0008270; GO:0007050; GO:0007049; GO:0006978; GO:0006915; GO:0006473; GO:0006260; GO:0005634; GO:0005515; GO:0003713; GO:0000123
chr8:145448754-145485896	LOC377711	XM_932037	37.0435	31.0432	1.19329	0.979854
chr21:40557403-40685556	BRWD1	NM_018963	15.3427	12.8638	1.1927	0.979274			GO:0008360; GO:0007010; GO:0006357; GO:0005737; GO:0005730; GO:0005634; GO:0003674
chr11:43333504-43366080	API5	NR_024625	162.324	136.244	1.19142	0.965448			GO:0017134; GO:0006916; GO:0006915; GO:0005737; GO:0005730; GO:0005681; GO:0005634; GO:0005488
chr8:145515221-145540377	HSF1	NM_005526	224.262	188.275	1.19114	0.962949		heat shock transcription factor 1	GO:0060136; GO:0045120; GO:0043565; GO:0043234; GO:0040018; GO:0032720; GO:0032496; GO:0009408; GO:0008285; GO:0007283; GO:0006468; GO:0006355; GO:0005737; GO:0005730; GO:0005634; GO:0005515; GO:0003700; GO:0001892
chr9:131451417-131451936	SET	NM_003011	920.03	773.047	1.19013	0.975879			GO:0048471; GO:0045892; GO:0043524; GO:0043234; GO:0042393; GO:0035067; GO:0016071; GO:0016070; GO:0008601; GO:0006913; GO:0006337; GO:0006334; GO:0006260; GO:0005829; GO:0005783; GO:0005737; GO:0005654; GO:0005634; GO:0005515; GO:0004864
chr6:43543499-43591046	POLH	NM_006502	38.6351	32.4883	1.1892	0.969614			GO:0046872; GO:0016779; GO:0016740; GO:0010225; GO:0006301; GO:0006290; GO:0006282; GO:0006281; GO:0006260; GO:0005737; GO:0005730; GO:0005654; GO:0005634; GO:0003887; GO:0003684; GO:0000731
chr9:140098533-140100090	TMEM203	NM_053045	201.483	169.431	1.18917	0.976652			GO:0016021; GO:0016020
chr3:50325162-50330026	IFRD2	NM_006764	210.929	177.559	1.18794	0.968224			GO:0005575; GO:0005488; GO:0003674
chr20:45838132-45985474	ZMYND8	NM_183047	62.3058	52.4499	1.18791	0.976652			GO:0070491; GO:0046872; GO:0016301; GO:0008270; GO:0005634; GO:0005515; GO:0001106; GO:0000122
chr18:158465-214931	USP14	NM_005151	80.325	67.6409	1.18752	0.969803			GO:0070628; GO:0061136; GO:0050920; GO:0019717; GO:0016023; GO:0010951; GO:0009986; GO:0008233; GO:0008193; GO:0007268; GO:0006511; GO:0006508; GO:0005886; GO:0005737; GO:0005625; GO:0005515; GO:0004866; GO:0004843; GO:0004221; GO:0004197; GO:0000502
chr11:95566043-95657371	MTMR2	NR_023356	52.2093	43.9851	1.18698	0.977825	ko00051		GO:0060079; GO:0051262; GO:0045806; GO:0043197; GO:0042803; GO:0030424; GO:0016791; GO:0016787; GO:0016020; GO:0014069; GO:0008138; GO:0008021; GO:0006470; GO:0005829; GO:0005774; GO:0005737; GO:0005634; GO:0005515; GO:0004725; GO:0002091
chr20:35625375-35724413	RBL1	NM_002895	28.0037	23.5933	1.18693	0.980056	ko04350; ko04110		GO:0051726; GO:0044419; GO:0043550; GO:0016568; GO:0008134; GO:0006355; GO:0005667; GO:0005634; GO:0005515; GO:0000122
chr21:34602221-34638593	IFNAR2	NM_207584	18.5459	15.6387	1.1859	0.986638	ko04060; ko05160; ko04650; ko04620; ko04630		GO:0060338; GO:0060337; GO:0035455; GO:0019962; GO:0019901; GO:0019221; GO:0009615; GO:0008283; GO:0007259; GO:0007166; GO:0006357; GO:0005887; GO:0005886; GO:0005615; GO:0005576; GO:0005515; GO:0004905; GO:0004872
chr1:29063132-29096287	YTHDF2	NM_001173128	300.528	253.47	1.18566	0.965448			GO:0006959
chr17:56078279-56084707	SFRS1	NM_006924	394.605	332.973	1.1851	0.96449		serine/arginine-rich splicing factor 1	GO:0071013; GO:0060048; GO:0050733; GO:0031124; GO:0016607; GO:0010467; GO:0008380; GO:0006406; GO:0006397; GO:0006376; GO:0006369; GO:0006366; GO:0005737; GO:0005654; GO:0005634; GO:0005515; GO:0003723; GO:0001701; GO:0000398; GO:0000395; GO:0000166
chr1:1849028-1850740	TMEM52	NM_178545	71.979	60.7525	1.18479	0.982422			GO:0016021; GO:0016020
chr5:36152117-36182990	SKP2	NM_005983	71.474	60.3646	1.18404	0.980056	ko05222; ko05200; ko04120; ko04110		GO:0051726; GO:0033148; GO:0031145; GO:0019005; GO:0008634; GO:0008283; GO:0006511; GO:0005829; GO:0005654; GO:0005515; GO:0004842; GO:0000278; GO:0000209; GO:0000086; GO:0000084; GO:0000082
chr8:21959395-21961911	FAM160B2	NM_022749	73.4089	62.0116	1.18379	0.980056
chr14:20779528-20801487	CCNB1IP1	NM_182851	203.612	172.01	1.18372	0.976652			GO:0051026; GO:0046872; GO:0035265; GO:0016874; GO:0007286; GO:0007132; GO:0006915; GO:0005694; GO:0005634; GO:0005515; GO:0001825
chr9:35088687-35096628	PIGO	NM_152850	50.7165	42.8454	1.18371	0.979854	ko00563		GO:0044267; GO:0043687; GO:0016740; GO:0016254; GO:0016021; GO:0016020; GO:0006506; GO:0006501; GO:0005789; GO:0005783; GO:0003674
chr8:141460878-141461483	TRAPPC9	NM_001160372	76.2068	64.4354	1.18269	0.988914			GO:0030154; GO:0005794; GO:0005783; GO:0005737
chr16:19716972-19869483	C16orf88	NM_001012991	65.8822	55.7501	1.18174	0.979854		chromosome 16 open reading frame 88	GO:0005730; GO:0005634
chr17:3576520-3599692	P2RX5	NM_002561	22.963	19.4476	1.18076	0.988355	ko04080; ko04020		GO:0050850; GO:0035590; GO:0016020; GO:0010524; GO:0007399; GO:0007165; GO:0006812; GO:0006810; GO:0005887; GO:0005524; GO:0005216; GO:0004931; GO:0004888; GO:0004872; GO:0001614
chr7:101459202-101893344	CUX1	NM_181552	35.8976	30.4041	1.18068	0.979854			GO:0043565; GO:0042491; GO:0030674; GO:0030324; GO:0030173; GO:0016021; GO:0016020; GO:0007275; GO:0006891; GO:0006810; GO:0006357; GO:0005794; GO:0005737; GO:0005730; GO:0005634; GO:0003700; GO:0003682; GO:0000301; GO:0000139; GO:0000122
chr7:33053741-33102426	NT5C3	NM_001166118	35.6984	30.2413	1.18045	0.986638	ko00230; ko00760; ko00240		GO:0055086; GO:0046135; GO:0046085; GO:0016787; GO:0009117; GO:0008665; GO:0008253; GO:0006213; GO:0006206; GO:0005829; GO:0005783; GO:0005739; GO:0005737; GO:0000287; GO:0000166
chr10:13359432-13390280	SEPHS1	NM_012247	96.7416	82.002	1.17975	0.977803	ko00450		GO:0016740; GO:0006464; GO:0005525; GO:0005524; GO:0004756; GO:0003824; GO:0000166
chr1:28879528-28908385	TRNAU1AP	NM_017846	47.042	39.8763	1.1797	0.980881		tRNA selenocysteine 1 associated protein 1	GO:0006412; GO:0005737; GO:0005634; GO:0003723; GO:0001514; GO:0000166
chr11:74459903-74660625	XRRA1	NM_182969	37.799	32.0442	1.17959	0.977825		X-ray radiation resistance associated 1	GO:0010165; GO:0005737; GO:0005634; GO:0003674
chr20:17594322-17662985	RRBP1	NM_001042576	292.466	247.994	1.17933	0.965448	ko04141	ribosome binding protein 1 homolog 180kDa (dog)	GO:0030176; GO:0016021; GO:0016020; GO:0015031; GO:0007165; GO:0006412; GO:0005840; GO:0005789; GO:0005783; GO:0004872
chr3:128997669-129025013	C3orf37	NM_020187	172.457	146.354	1.17836	0.976652
chr9:140100118-140113813	NDOR1	NM_001144026	11.3342	9.62026	1.17816	0.988914			GO:0055114; GO:0050661; GO:0050660; GO:0048471; GO:0045111; GO:0016491; GO:0010181; GO:0008219; GO:0005829; GO:0005737; GO:0005634; GO:0005515; GO:0005506
chr8:42128819-42190171	IKBKB	NM_001556	38.4596	32.6558	1.17773	0.982422	ko05215; ko04620; ko04010; ko04662; ko05200; ko05131; ko04062; ko04920; ko05142; ko04910; ko04722; ko04660; ko05145; ko05160; ko04622; ko04210; ko04930; ko05222; ko05212; ko04623; ko05221; ko05220; ko04621; ko05120		GO:0070423; GO:0051092; GO:0050852; GO:0048011; GO:0045893; GO:0045121; GO:0045087; GO:0043123; GO:0035631; GO:0034142; GO:0034138; GO:0034134; GO:0034130; GO:0016020; GO:0009898; GO:0009615; GO:0008385; GO:0008384; GO:0008063; GO:0007249; GO:0006954; GO:0006916; GO:0006468; GO:0005829; GO:0005737; GO:0005634; GO:0005524; GO:0005515; GO:0004674; GO:0004672; GO:0002756; GO:0002755; GO:0002224; GO:…
chr20:461700-524482	CSNK2A1	NM_001895	156.544	133.037	1.1767	0.969803	ko04712; ko04310; ko04530; ko04520		GO:0071174; GO:0061077; GO:0051879; GO:0050790; GO:0047485; GO:0046777; GO:0043154; GO:0031519; GO:0030177; GO:0019888; GO:0016772; GO:0016581; GO:0016580; GO:0008013; GO:0007411; GO:0007165; GO:0007049; GO:0006468; GO:0006355; GO:0005886; GO:0005829; GO:0005634; GO:0005524; GO:0005515; GO:0004674; GO:0000166
chr9:14081841-14398982	NFIB	NM_001190737	8.20597	6.97519	1.17645	0.986638			GO:2000795; GO:2000791; GO:0071679; GO:0061141; GO:0060510; GO:0060509; GO:0060486; GO:0045944; GO:0044300; GO:0043392; GO:0030902; GO:0030900; GO:0030324; GO:0021960; GO:0021740; GO:0010001; GO:0008285; GO:0006366; GO:0006260; GO:0005730; GO:0005634; GO:0005622; GO:0003700; GO:0003690; GO:0003677; GO:0002062; GO:0001106; GO:0001077; GO:0000981; GO:0000122
chr11:116648450-116658739	ZNF259	NM_003904	117.759	100.101	1.1764	0.977825			GO:0046872; GO:0008283; GO:0008270; GO:0007165; GO:0005737; GO:0005730; GO:0005634
chr7:72854727-72936615	BAZ1B	NM_032408	194.534	165.386	1.17624	0.966685			GO:0071884; GO:0071778; GO:0070577; GO:0048096; GO:0046872; GO:0043596; GO:0043044; GO:0042809; GO:0040029; GO:0035173; GO:0034725; GO:0032947; GO:0016740; GO:0016585; GO:0016572; GO:0016301; GO:0008270; GO:0006974; GO:0006355; GO:0006351; GO:0006337; GO:0006333; GO:0006302; GO:0005721; GO:0005634; GO:0005524; GO:0005515; GO:0004715; GO:0004713; GO:0003682; GO:0003007; GO:0000793; GO:0000166
chr11:394156-404908	PKP3	NM_007183	141.942	120.713	1.17586	0.971357			GO:0030057; GO:0007155; GO:0005911; GO:0005634; GO:0005488
chr9:102589008-102596341	NR4A3	NM_006981	2.0512	1.7452	1.17534	1			GO:2000108; GO:0060005; GO:0050885; GO:0048752; GO:0046872; GO:0045787; GO:0043565; GO:0043524; GO:0043434; GO:0043401; GO:0033554; GO:0031100; GO:0030534; GO:0021766; GO:0010467; GO:0008270; GO:0008150; GO:0007411; GO:0005667; GO:0005654; GO:0005634; GO:0005488; GO:0004887; GO:0004872; GO:0003707; GO:0003700; GO:0003677; GO:0001707; GO:0001077
chrX:23801274-23804327	SAT1	NR_027783	199.688	169.931	1.17511	0.975734	ko00330		GO:0042127; GO:0034641; GO:0019809; GO:0016746; GO:0008152; GO:0006596; GO:0006595; GO:0005829; GO:0005737; GO:0005625; GO:0005622; GO:0005515; GO:0004145; GO:0001525
chr11:64570985-64578766	MEN1	NM_130804	0.0027369	0.00232951	1.17488	1			GO:0070412; GO:0060135; GO:0060021; GO:0051974; GO:0051781; GO:0048704; GO:0047485; GO:0046621; GO:0046329; GO:0045944; GO:0045892; GO:0045786; GO:0045736; GO:0045669; GO:0045668; GO:0044212; GO:0043433; GO:0043280; GO:0043234; GO:0043065; GO:0035097; GO:0034968; GO:0032925; GO:0032154; GO:0032092; GO:0031062; GO:0030674; GO:0030511; GO:0030097; GO:0018024; GO:0016363; GO:0010332; GO:0009790; GO:…
chr8:22960326-22975940	TNFRSF10C	NM_003841	53.1839	45.2735	1.17472	0.982422	ko04060; ko04650; ko04210		GO:0045569; GO:0031225; GO:0007165; GO:0006915; GO:0005887; GO:0005886; GO:0005488; GO:0004888; GO:0004872
chr11:63763998-63933831	MACROD1	NM_014067	209.99	178.76	1.1747	0.969736			GO:0042278; GO:0019213; GO:0005739
chr8:129112319-129113497	PVT1	NR_003367	252.886	215.326	1.17443	0.978773		Pvt1 oncogene (non-protein coding)
chr1:226107579-226112011	PYCR2	NM_013328	386.346	329.308	1.17321	0.969736	ko00330		GO:0016616; GO:0016491; GO:0008652; GO:0006561; GO:0005737; GO:0004735; GO:0000166
chr16:28875077-28885615	SH2B1	NM_001145812	59.2704	50.5271	1.17304	0.980056	ko04722		GO:0035556; GO:0016020; GO:0007596; GO:0005829; GO:0005737; GO:0005634; GO:0004871
chr12:56915607-56992797	RBMS2	NM_002898	60.1732	51.3862	1.171	0.97171			GO:0006396; GO:0005634; GO:0003723; GO:0000166
chr5:137492572-137514358	BRD8	NM_139199	89.2643	76.237	1.17088	0.978773			GO:0043968; GO:0043967; GO:0040008; GO:0035267; GO:0016568; GO:0007166; GO:0007165; GO:0006357; GO:0006355; GO:0005739; GO:0005730; GO:0005634; GO:0004887; GO:0003700
chr22:32150045-32303007	DEPDC5	NM_014662	25.7998	22.0534	1.16988	0.982422			GO:0035556
chr7:5390963-5463409	TNRC18	NM_001080495	122.086	104.384	1.16959	0.970824			GO:0003677
chrX:69672143-69725340	DLG3	NM_021120	60.0404	51.3429	1.1694	0.978773			GO:0045202; GO:0043198; GO:0043025; GO:0035255; GO:0030426; GO:0030165; GO:0019903; GO:0019902; GO:0014069; GO:0010923; GO:0008285; GO:0008022; GO:0007411; GO:0007268; GO:0005886; GO:0005737; GO:0005515; GO:0004385
chr1:156610402-156629676	BCAN	NM_021948	51.9581	44.438	1.16923	0.978773			GO:0048168; GO:0045202; GO:0031225; GO:0030425; GO:0021766; GO:0016020; GO:0007155; GO:0005624; GO:0005615; GO:0005578; GO:0005576; GO:0005540; GO:0005529; GO:0005488
chr11:867858-915058	CHID1	NM_001142674	114.645	98.0937	1.16873	0.977825			GO:0045087; GO:0043169; GO:0006032; GO:0005975; GO:0005764; GO:0005576; GO:0004568; GO:0003824
chr20:47894714-47905797	C20orf199	NR_003605	1298.87	1112.28	1.16775	0.976652		ZNFX1 antisense RNA 1 (non-protein coding)
chr14:70237620-70238684	SFRS5	NM_001039465	416.372	357.205	1.16564	0.977825			GO:0031124; GO:0016607; GO:0010467; GO:0008380; GO:0006406; GO:0006397; GO:0006376; GO:0006369; GO:0006366; GO:0005737; GO:0005730; GO:0005654; GO:0005634; GO:0005515; GO:0003723; GO:0000398; GO:0000166
chr1:40204516-40222441	PPIE	NM_001195007	92.0199	79.0239	1.16446	0.977825	ko03040		GO:0071013; GO:0016853; GO:0016018; GO:0008380; GO:0006457; GO:0006355; GO:0005634; GO:0005515; GO:0003755; GO:0003723; GO:0000413; GO:0000398; GO:0000166
chr10:115614390-115673180	NHLRC2	NM_198514	21.9584	18.8575	1.16444	0.982422
chr16:68331139-68391173	PRMT7	NM_019023	68.5261	58.9242	1.16295	0.983413			GO:0044020; GO:0043985; GO:0043393; GO:0043046; GO:0043021; GO:0042393; GO:0035247; GO:0035243; GO:0035241; GO:0034969; GO:0030154; GO:0019918; GO:0018216; GO:0016740; GO:0016571; GO:0016568; GO:0016277; GO:0008757; GO:0008469; GO:0008276; GO:0006355; GO:0006349; GO:0005829; GO:0005737; GO:0005634; GO:0000387
chr15:41136200-41150505	SPINT1	NM_181642	255.006	219.292	1.16286	0.973105			GO:0060674; GO:0060670; GO:0030414; GO:0030198; GO:0005624; GO:0005576; GO:0004867; GO:0001892
chr7:105245217-105319609	ATXN7L1	NM_020725	10.3867	8.94066	1.16174	0.988914
chr7:94214535-94285553	SGCE	NM_001099401	6.3656	5.47966	1.16168	0.992518			GO:0042383; GO:0016012; GO:0016010; GO:0007517; GO:0007160; GO:0005887; GO:0005856; GO:0005737; GO:0005509
chr22:47570449-47571337	TBC1D22A	NM_014346	45.3905	39.0919	1.16112	0.989566			GO:0042803; GO:0005622; GO:0005097; GO:0005096
chr14:103243753-103372628	TRAF3	NM_145725	72.119	62.1171	1.16102	0.982422	ko05222; ko05200; ko05160; ko04620; ko04622		GO:0050688; GO:0046872; GO:0045087; GO:0042981; GO:0035631; GO:0033209; GO:0032648; GO:0032480; GO:0032088; GO:0030162; GO:0016874; GO:0009898; GO:0008270; GO:0007165; GO:0006917; GO:0005829; GO:0005768; GO:0005739; GO:0005737; GO:0005515; GO:0004871; GO:0004842; GO:0002224; GO:0001817
chr15:23004683-23034427	NIPA2	NM_001184889	108.11	93.2136	1.15981	0.979854			GO:0016021; GO:0015693; GO:0006811; GO:0005886; GO:0005769
chr7:45139698-45151328	TBRG4	NM_004749	332.722	286.99	1.15935	0.976652			GO:0045333; GO:0008284; GO:0007050; GO:0005739; GO:0004672; GO:0000080
chrX:11776708-11786096	MSL3	NM_078629	10.7801	9.30259	1.15883	0.989546			GO:0072487; GO:0043984; GO:0035064; GO:0016568; GO:0007275; GO:0006366; GO:0006355; GO:0005634; GO:0003700; GO:0003677
chr11:5617346-5706339	TRIM5	NM_033034	21.1195	18.2496	1.15726	0.989566			GO:0070206; GO:0046872; GO:0044419; GO:0042803; GO:0016874; GO:0009615; GO:0008270; GO:0005737; GO:0005622; GO:0005515; GO:0000932
chr8:143845755-143858437	LYNX1	NM_023946	5.47638	4.73336	1.15698	0.996605			GO:0031225; GO:0005886; GO:0005576
chr1:53361753-53377689	ECHDC2	NM_018281	46.1236	39.8657	1.15697	0.989138			GO:0016829; GO:0006631; GO:0006629; GO:0005739
chr2:48796158-48826045	STON1-GTF2A1L	NM_172311	0.698891	0.604068	1.15697	1			GO:0030131; GO:0006897; GO:0006886; GO:0006367; GO:0005672
chr11:101983170-102104154	YAP1	NM_001130145	131.858	113.968	1.15697	0.976652			GO:0071480; GO:0060242; GO:0044212; GO:0035329; GO:0008283; GO:0006974; GO:0006355; GO:0005737; GO:0005634; GO:0005515; GO:0003714; GO:0003713
chr8:22298579-22298968	PPP3CC	NM_005605	42.8823	37.0642	1.15697	0.992504	ko04360; ko05014; ko04010; ko05010; ko04720; ko04662; ko04210; ko04310; ko04650; ko04660; ko04020; ko04114; ko04370		GO:0046872; GO:0016787; GO:0008633; GO:0008629; GO:0006915; GO:0005829; GO:0005516; GO:0004721
chr2:190648810-190742355	PMS1	NM_000534	30.9348	26.7377	1.15697	0.988355			GO:0032389; GO:0030983; GO:0016887; GO:0007131; GO:0006298; GO:0006200; GO:0005634; GO:0005524; GO:0003677
chr20:35411214-35488341	C20orf117	NM_080627	24.6418	21.3044	1.15665	0.982422
chr16:67906941-67918439	EDC4	NM_014329	121.16	104.827	1.15581	0.976652	ko03018		GO:0043928; GO:0016071; GO:0016070; GO:0008150; GO:0005829; GO:0005737; GO:0005634; GO:0005515; GO:0000932; GO:0000288
chr17:34958008-34965407	MRM1	NM_024864	52.0389	45.0554	1.155	0.988355			GO:0016740; GO:0008173; GO:0006396; GO:0005739; GO:0003723
chr2:102314106-102511152	MAP4K4	NM_145686	122.557	106.117	1.15492	0.976652	ko04010		GO:0046328; GO:0007243; GO:0006950; GO:0006468; GO:0005737; GO:0005524; GO:0005515; GO:0005083; GO:0004674; GO:0000166
chr20:55953047-55953614	RAE1	NM_003610	212.213	183.816	1.15449	0.988914	ko03013		GO:0071407; GO:0055085; GO:0016032; GO:0015758; GO:0010827; GO:0008645; GO:0008017; GO:0006406; GO:0005975; GO:0005856; GO:0005737; GO:0005643; GO:0005640; GO:0005635; GO:0005634; GO:0003723
chr17:7338756-7342458	TMEM102	NM_178518	47.9421	41.5414	1.15408	0.984628			GO:0042981; GO:0034097; GO:0016021; GO:0009986; GO:0007165; GO:0005886; GO:0005622; GO:0005515
chr20:54944444-54967351	AURKA	NM_198433	110.993	96.1902	1.15389	0.982422	ko04114		GO:0051301; GO:0048471; GO:0048015; GO:0046777; GO:0046605; GO:0045840; GO:0032355; GO:0031647; GO:0031625; GO:0031616; GO:0031145; GO:0030496; GO:0030030; GO:0019901; GO:0016301; GO:0007067; GO:0007051; GO:0007049; GO:0006468; GO:0005876; GO:0005856; GO:0005829; GO:0005819; GO:0005813; GO:0005737; GO:0005634; GO:0005524; GO:0005515; GO:0004712; GO:0004674; GO:0004672; GO:0000278; GO:0000166
chr18:47795215-47808148	MBD1	NM_015846	13.0584	11.3171	1.15386	0.989566			GO:0046872; GO:0045892; GO:0016607; GO:0008327; GO:0008270; GO:0006366; GO:0006355; GO:0005694; GO:0005634; GO:0005515; GO:0003714; GO:0003700; GO:0003677
chr2:219500987-219526030	ZNF142	NM_001105537	58.7872	50.9688	1.1534	0.977825		zinc finger protein 142	GO:0046872; GO:0008270; GO:0008150; GO:0006355; GO:0005634; GO:0005622; GO:0005575; GO:0003677; GO:0003674
chr21:47878846-47989926	DIP2A	NM_015151	18.0267	15.6296	1.15337	0.989393			GO:0008134; GO:0007275; GO:0005634; GO:0005515; GO:0003824
chr4:2271323-2420436	ZFYVE28	NM_001172659	22.1963	19.2745	1.15159	0.988914			GO:0046872; GO:0042059; GO:0032266; GO:0031901; GO:0016020; GO:0007175; GO:0005829; GO:0005768; GO:0005737; GO:0005515
chr1:151375199-151431941	POGZ	NM_015100	75.6308	65.6761	1.15157	0.978773			GO:0051382; GO:0051301; GO:0046872; GO:0008270; GO:0007064; GO:0007049; GO:0006355; GO:0005737; GO:0005730; GO:0005694; GO:0005634; GO:0005622; GO:0005515; GO:0003677; GO:0000790
chr8:6264065-6501597	MCPH1	NM_024596	26.4408	22.9694	1.15113	0.988914			GO:0005856; GO:0005815; GO:0005737; GO:0005622
chr10:32556746-32636165	EPC1	NM_025209	30.1697	26.2128	1.15095	0.988238			GO:0045944; GO:0045893; GO:0045892; GO:0045814; GO:0043968; GO:0043967; GO:0040008; GO:0035267; GO:0032777; GO:0031965; GO:0016568; GO:0006351; GO:0005654; GO:0005634; GO:0004402; GO:0000122
chr7:100064141-100076933	TSC22D4	NM_030935	67.6674	58.8012	1.15078	0.984406			GO:0045892; GO:0006970; GO:0006355; GO:0005634; GO:0005515; GO:0003700
chr7:86781676-86849107	C7orf23	NM_024315	20.6565	17.9593	1.15018	0.989566			GO:0016021; GO:0016020
chr3:61547162-62304622	PTPRG	NM_002841	37.8861	32.9556	1.14961	0.981524			GO:0042802; GO:0035335; GO:0016787; GO:0016020; GO:0007169; GO:0005887; GO:0005001; GO:0004725
chr8:17354499-17428077	SLC7A2	NM_001008539	6.78965	5.90707	1.14941	0.989566			GO:0055085; GO:0050727; GO:0043030; GO:0034641; GO:0015802; GO:0015189; GO:0015174; GO:0006865; GO:0006811; GO:0006810; GO:0006809; GO:0006520; GO:0005887; GO:0005886; GO:0005737; GO:0005624; GO:0005289; GO:0002537; GO:0000064
chr11:93467219-93474703	TAF1D	NM_024116	111.99	97.4556	1.14914	0.980056			GO:0006355; GO:0005634; GO:0005515; GO:0003677
chr16:12070593-12668226	SNX29	NM_001080530	12.0921	10.5231	1.1491	0.988914		sorting nexin 29	GO:0035091; GO:0007154
chr17:34842472-34852641	ZNHIT3	NM_004773	203.282	176.923	1.14899	0.980056			GO:0046966; GO:0046872; GO:0006355; GO:0005622
chrX:70767200-70795747	OGT	NM_181672	121.235	105.516	1.14897	0.977825			GO:0071300; GO:0070688; GO:0070207; GO:0051571; GO:0048029; GO:0048015; GO:0046626; GO:0045862; GO:0043085; GO:0042277; GO:0035020; GO:0032868; GO:0030854; GO:0016757; GO:0016262; GO:0008375; GO:0008047; GO:0007584; GO:0007165; GO:0006493; GO:0005886; GO:0005829; GO:0005813; GO:0005737; GO:0005730; GO:0005634; GO:0005547; GO:0005515
chr10:46222647-46288412	FAM21C	NM_015262	81.9553	71.3519	1.14861	0.980383			GO:0071203; GO:0042147; GO:0031901; GO:0006810; GO:0005886; GO:0005769; GO:0005515
chr6:160148511-160177351	WTAP	NM_004906	117.542	102.416	1.14769	0.982422			GO:0031965; GO:0008380; GO:0007049; GO:0006397; GO:0005730; GO:0005654; GO:0005634
chr8:145578875-145584946	FBXL6	NM_012162	109.504	95.4526	1.14721	0.981504			GO:0016567; GO:0006508; GO:0004842
chr16:57496550-57520385	POLR2C	NM_032940	193.773	168.932	1.14705	0.978773	ko05016; ko00230; ko00240; ko03020		GO:0050434; GO:0046983; GO:0016032; GO:0015630; GO:0010467; GO:0008380; GO:0006468; GO:0006370; GO:0006368; GO:0006367; GO:0006366; GO:0006289; GO:0006283; GO:0006281; GO:0005737; GO:0005730; GO:0005665; GO:0005654; GO:0005634; GO:0004672; GO:0003899; GO:0003677; GO:0000398
chr3:123212191-123303924	PTPLB	NM_198402	77.944	67.9703	1.14674	0.986449			GO:0016829; GO:0016021; GO:0016020; GO:0006633; GO:0005789; GO:0005783; GO:0005515
chr6:31938951-31949223	STK19	NM_032454	31.3381	27.3396	1.14625	0.989566		serine/threonine kinase 19	GO:0016740; GO:0016301; GO:0006468; GO:0005634; GO:0005524; GO:0004674; GO:0000166
chr11:65210510-65212878	MIR612	NR_030343	24.2194	21.1551	1.14485	0.989566
chr3:123331136-123603149	MYLK	NM_053025	3.43388	2.99942	1.14485	1	ko04810; ko04270; ko04020; ko04510; ko04971		GO:0090303; GO:0071476; GO:0060414; GO:0051928; GO:0046872; GO:0032154; GO:0032060; GO:0030335; GO:0030027; GO:0019899; GO:0016301; GO:0014820; GO:0006939; GO:0006936; GO:0006468; GO:0005829; GO:0005737; GO:0005524; GO:0005516; GO:0005515; GO:0004687; GO:0003779; GO:0001725; GO:0000166
chr20:61427804-61432026	C20orf20	NM_018270	127.689	111.578	1.14439	0.983512			GO:0043189; GO:0040008; GO:0016568; GO:0006355; GO:0005634
chr16:67143914-67184912	C16orf70	NM_025187	42.8365	37.4378	1.1442	0.986903			GO:0043001; GO:0035254; GO:0030672; GO:0030425; GO:0005802; GO:0005624; GO:0005515
chr12:72233486-72320629	TBC1D15	NM_001146213	94.41	82.5437	1.14376	0.990243			GO:0032851; GO:0032313; GO:0005737; GO:0005622; GO:0005515; GO:0005097; GO:0005096
chrX:151918387-151922364	MAGEA2	NM_175743	353.372	309.032	1.14348	0.979854
chr7:127228423-127231752	ARF5	NM_001662	757.219	662.406	1.14313	0.977825			GO:0048471; GO:0016192; GO:0015031; GO:0007264; GO:0006184; GO:0005886; GO:0005794; GO:0005737; GO:0005622; GO:0005525; GO:0005515; GO:0003924; GO:0000166
chr12:49316908-49318664	FKBP11	NM_001143782	15.3944	13.472	1.1427	0.992518			GO:0018208; GO:0016853; GO:0016021; GO:0016020; GO:0006457; GO:0005528; GO:0003755; GO:0000413
chr3:40518603-40531814	ZNF619	NM_001145083	8.26681	7.23451	1.14269	0.990243			GO:0046872; GO:0008270; GO:0006355; GO:0005634; GO:0005622; GO:0003677; GO:0003676
chrX:37208527-37301477	PRRG1	NM_001173489	8.13802	7.12181	1.14269	0.991478			GO:0016020; GO:0005887; GO:0005576; GO:0005509
chr3:14176744-14185180	TMEM43	NM_024334	96.9738	84.8968	1.14226	0.983098			GO:0016021; GO:0016020; GO:0005794; GO:0005783; GO:0005637; GO:0005634
chr16:53468350-53526427	RBL2	NM_005611	32.4304	28.4197	1.14112	0.986732	ko04350; ko04110		GO:0051726; GO:0043550; GO:0016568; GO:0006355; GO:0005737; GO:0005730; GO:0005667; GO:0005634; GO:0005515; GO:0003677; GO:0000785
chr8:103264732-103425039	UBR5	NM_015902	114.776	100.648	1.14037	0.978773	ko04120		GO:0090263; GO:0050847; GO:0046872; GO:0043130; GO:0042787; GO:0035413; GO:0034450; GO:0033160; GO:0016881; GO:0016874; GO:0016567; GO:0008283; GO:0008270; GO:0006974; GO:0006511; GO:0006464; GO:0005634; GO:0005625; GO:0005622; GO:0005515; GO:0004842; GO:0003723; GO:0000209
chr20:33814538-33866101	MMP24	NM_006690	60.107	52.7128	1.14027	0.982422			GO:0043085; GO:0008270; GO:0008233; GO:0008152; GO:0008047; GO:0006508; GO:0005887; GO:0005886; GO:0005578; GO:0005576; GO:0005509; GO:0004222
chr15:75136073-75165713	SCAMP2	NM_005697	252.938	221.986	1.13943	0.980056			GO:0055038; GO:0043231; GO:0032588; GO:0016021; GO:0016020; GO:0015031; GO:0006892; GO:0005794; GO:0005768; GO:0005730; GO:0005634; GO:0005515
chr7:99661496-99679372	ZNF3	NM_032924	84.4039	74.1081	1.13893	0.986638		zinc finger protein 3	GO:0046872; GO:0045321; GO:0042802; GO:0030154; GO:0008270; GO:0007275; GO:0006355; GO:0005730; GO:0005634; GO:0005622; GO:0005515; GO:0003700; GO:0003677
chr5:151151461-151187398	G3BP1	NM_198395	207.561	182.244	1.13892	0.978773			GO:0016787; GO:0007265; GO:0006810; GO:0005886; GO:0005829; GO:0005737; GO:0005634; GO:0005622; GO:0005524; GO:0005515; GO:0004519; GO:0004386; GO:0004004; GO:0004003; GO:0003723; GO:0003677; GO:0000166
chr1:33402048-33430478	RNF19B	NM_001127361	79.3342	69.6654	1.13879	0.986638			GO:0046872; GO:0016874; GO:0016021; GO:0016020; GO:0008270; GO:0005515
chr7:154720226-154741200	LOC100132707	NR_024476	18.8169	16.5262	1.13861	0.990322
chr3:52518324-52527088	NISCH	NM_007184	124.575	109.418	1.13852	0.98149		nischarin	GO:0055037; GO:0048243; GO:0035091; GO:0032228; GO:0030336; GO:0030036; GO:0016601; GO:0008227; GO:0008217; GO:0007154; GO:0006915; GO:0006006; GO:0005886; GO:0005829; GO:0005769; GO:0005737; GO:0005624; GO:0005178; GO:0004872
chr3:48488185-48509044	ATRIP	NM_130384	51.9431	45.6659	1.13746	0.986638			GO:0006281; GO:0006260; GO:0005654; GO:0005634; GO:0005515; GO:0000077; GO:0000075
chr18:74690788-74844774	MBP	NM_001025101	29.2514	25.7179	1.13739	0.989566			GO:0043209; GO:0019911; GO:0008366; GO:0007417; GO:0007268; GO:0006955; GO:0005886
chr14:93403258-93582263	ITPK1	NM_014216	60.0506	52.8134	1.13703	0.988914	ko04070; ko00562		GO:0052726; GO:0052725; GO:0047325; GO:0032957; GO:0016874; GO:0016853; GO:0016787; GO:0016740; GO:0016301; GO:0008152; GO:0007596; GO:0007165; GO:0005829; GO:0005622; GO:0005524; GO:0003824; GO:0000287; GO:0000166
chr16:89753075-89768101	SPATA2L	NM_152339	66.3479	58.3552	1.13697	0.982422
chr1:15943892-15989458	DDI2	NM_032341	42.1102	37.056	1.13639	0.987818			GO:0006508; GO:0004190
chr20:43560362-43567962	PABPC1L	NM_001124756	100.598	88.5465	1.1361	0.987926			GO:0003723; GO:0000166
chr16:15688197-15737023	KIAA0430	NM_001184998	33.2067	29.2305	1.13603	0.985634			GO:0010923; GO:0005777; GO:0003723; GO:0000166
chr21:45845307-45862964	TRPM2	NM_003307	103.298	90.9337	1.13597	0.986638			GO:0070588; GO:0055085; GO:0047631; GO:0033194; GO:0016787; GO:0006816; GO:0006811; GO:0005887; GO:0005886; GO:0005384; GO:0005272; GO:0005262; GO:0005216
chr21:43218384-43299591	PRDM15	NM_022115	13.2486	11.6638	1.13587	0.989393			GO:0046872; GO:0008270; GO:0006355; GO:0005634; GO:0005622; GO:0003677; GO:0003676
chr3:39093497-39149130	WDR48	NM_020839	35.9551	31.6999	1.13423	0.988355			GO:0044419; GO:0043231; GO:0016579; GO:0005764; GO:0005737; GO:0005634; GO:0005515
chr7:131185020-131241376	PODXL	NM_001018111	113.374	100.121	1.13237	0.980056		podocalyxin-like	GO:0072175; GO:0050900; GO:0045121; GO:0043231; GO:0033634; GO:0032534; GO:0031528; GO:0030335; GO:0030175; GO:0030027; GO:0022408; GO:0016477; GO:0016324; GO:0015629; GO:0005887; GO:0005886; GO:0005813; GO:0005737; GO:0005730; GO:0001726
chr3:39093497-39149130	GORASP1	NM_031899	40.0537	35.3723	1.13235	0.988648			GO:0016020; GO:0015031; GO:0007030; GO:0005829; GO:0005794; GO:0000278; GO:0000088; GO:0000087
chr11:61170119-61197464	CPSF7	NM_024811	152.967	135.094	1.1323	0.982422			GO:0051262; GO:0031124; GO:0010467; GO:0008380; GO:0006397; GO:0006369; GO:0006366; GO:0005849; GO:0005654; GO:0005634; GO:0005515; GO:0003723; GO:0000398; GO:0000166
chr5:64920557-64961954	C5orf44	NM_001093755	20.1993	17.8419	1.13213	0.989594
chr10:180423-300577	ZMYND11	NM_006624	42.5036	37.5451	1.13207	0.988914			GO:0046872; GO:0046329; GO:0044419; GO:0043124; GO:0043066; GO:0008283; GO:0008270; GO:0007049; GO:0006355; GO:0005737; GO:0005730; GO:0005634; GO:0005515; GO:0003677; GO:0000122
chr3:12045823-12046116	SYN2	NM_133625	51.4543	45.4839	1.13126	0.997694		synapsin II	GO:0045202; GO:0030054; GO:0016874; GO:0008021; GO:0007269; GO:0007268; GO:0005524
chr11:236807-252984	PSMD13	NM_002817	526.862	465.729	1.13126	0.980056	ko03050	proteasome (prosome, macropain) 26S subunit, non-ATPase, 13	GO:0051439; GO:0051437; GO:0051436; GO:0042981; GO:0034641; GO:0031145; GO:0016071; GO:0016070; GO:0016032; GO:0007127; GO:0006977; GO:0006915; GO:0006521; GO:0005838; GO:0005829; GO:0005654; GO:0002474; GO:0000502; GO:0000278; GO:0000216; GO:0000209; GO:0000084; GO:0000082; GO:0000075
chr6:31515337-31515529	NFKBIL1	NM_005007	578.334	511.229	1.13126	0.991975			GO:0042994
chr11:46958250-47187049	C11orf49	NM_001003678	135.603	119.887	1.13109	0.985399			GO:0005730; GO:0005634
chr3:56591183-56698074	CCDC66	NM_001141947	14.3125	12.6566	1.13083	0.990322
chr19:3094343-3123963	GNA11	NM_002067	129.995	114.971	1.13068	0.982422	ko04912; ko05146; ko04270; ko05142; ko04020; ko04730; ko04540	guanine nucleotide binding protein (G protein), alpha 11 (Gq class)	GO:0060158; GO:0048066; GO:0046872; GO:0045634; GO:0031683; GO:0031234; GO:0030168; GO:0019001; GO:0007596; GO:0007507; GO:0007188; GO:0007186; GO:0007165; GO:0006471; GO:0006184; GO:0005886; GO:0005834; GO:0005737; GO:0005624; GO:0005525; GO:0005085; GO:0004871; GO:0004629; GO:0003924; GO:0001664; GO:0001508; GO:0001501; GO:0000166
chr16:77224835-77247650	SYCE1L	NM_001129979	14.0243	12.4056	1.13048	0.990322			GO:0007126
chr8:135490030-135708801	ZFAT	NM_001029939	14.2561	12.6114	1.13041	0.990101			GO:0046872; GO:0008270; GO:0006355; GO:0005829; GO:0005737; GO:0005634; GO:0005622; GO:0003677
chr16:1826373-1830803	SPSB3	NM_080861	66.3009	58.6724	1.13002	0.987178			GO:0035556; GO:0004872
chr22:20008630-20054662	C22orf25	NM_152906	56.0398	49.6211	1.12935	0.988914
chr16:58196443-58231782	CSNK2A2	NM_001896	108.848	96.4207	1.12889	0.986638	ko04712; ko04310; ko04530; ko04520		GO:0071174; GO:0051726; GO:0047485; GO:0031519; GO:0016055; GO:0007411; GO:0006915; GO:0006355; GO:0005829; GO:0005634; GO:0005524; GO:0005515; GO:0004674; GO:0000166
chr12:6949374-6955306	GNB3	NM_002075	13.7136	12.1494	1.12875	0.991478	ko04062; ko04742		GO:0071377; GO:0051020; GO:0008217; GO:0007268; GO:0007186; GO:0006184; GO:0006112; GO:0005886; GO:0004871; GO:0003924
chr9:131482396-131486408	ZDHHC12	NM_032799	251.444	222.892	1.1281	0.982422			GO:0046872; GO:0016746; GO:0016021; GO:0016020; GO:0008270
chr11:20044635-20143147	NAV2	NM_182964	1.97574	1.75163	1.12794	1			GO:0016787; GO:0005634; GO:0005524; GO:0004386; GO:0000166
chr16:9185483-9198078	C16orf72	NM_014117	81.7997	72.6653	1.12571	0.989393
chr15:78857826-78883309	CHRNA5	NM_000745	64.1079	56.9624	1.12544	0.989566	ko04080		GO:0045211; GO:0045202; GO:0043025; GO:0042166; GO:0035095; GO:0030425; GO:0030054; GO:0016021; GO:0015464; GO:0015276; GO:0007268; GO:0007165; GO:0006811; GO:0006810; GO:0005892; GO:0005886; GO:0005230; GO:0004889; GO:0004872
chr2:127805606-127864864	BIN1	NM_139343	70.9677	63.0577	1.12544	0.989393			GO:0051020; GO:0046982; GO:0045807; GO:0044419; GO:0044300; GO:0043679; GO:0043547; GO:0043196; GO:0042692; GO:0015629; GO:0008283; GO:0008021; GO:0007275; GO:0005737; GO:0005634; GO:0005515
chr5:137522683-137549032	CDC23	NM_004661	86.2909	76.7142	1.12484	0.986638	ko04120; ko04113; ko04111; ko04914; ko04110; ko04114	cell division cycle 23 homolog (S. cerevisiae)	GO:0070979; GO:0051439; GO:0051437; GO:0051436; GO:0051301; GO:0031145; GO:0030071; GO:0016567; GO:0007096; GO:0007094; GO:0007091; GO:0007080; GO:0007067; GO:0007049; GO:0006511; GO:0005829; GO:0005680; GO:0005654; GO:0005622; GO:0005488; GO:0004842; GO:0000278; GO:0000080; GO:0000075
chr1:145508912-145516076	GNRHR2	NR_002328	58.8648	52.3585	1.12426	0.984406		gonadotropin-releasing hormone (type 2) receptor 2	GO:0016021; GO:0005886; GO:0004968; GO:0004930; GO:0004872; GO:0004871
chr19:44116150-44118650	SRRM5	NM_001145641	25.1493	22.3851	1.12348	0.990322
chr8:54628114-54755850	ATP6V1H	NM_015941	110.28	98.2093	1.12291	0.988914	ko00190; ko04142; ko04145; ko05110; ko05120		GO:0055085; GO:0050790; GO:0050690; GO:0046961; GO:0044419; GO:0033572; GO:0030234; GO:0016887; GO:0016820; GO:0016032; GO:0015992; GO:0015991; GO:0008286; GO:0007035; GO:0006897; GO:0006879; GO:0006811; GO:0006200; GO:0005886; GO:0005829; GO:0005515; GO:0000221
chr1:161284109-161338760	SDHC	NM_003001	81.8948	73.0352	1.12131	0.985942	ko05016; ko00020; ko00190; ko05010; ko05012		GO:0055114; GO:0046872; GO:0045282; GO:0045273; GO:0022904; GO:0020037; GO:0016021; GO:0016020; GO:0009060; GO:0009055; GO:0006810; GO:0006099; GO:0005749; GO:0005743; GO:0005739; GO:0000104
chr12:42719657-42842422	PPHLN1	NM_016488	70.4285	62.8343	1.12086	0.988914			GO:0031424; GO:0005737; GO:0005730; GO:0005634
chr3:195963805-196014584	PCYT1A	NM_005017	104.219	93.0847	1.11961	0.988355	ko00564; ko00440		GO:0042587; GO:0016779; GO:0016740; GO:0016020; GO:0009628; GO:0009058; GO:0008654; GO:0008289; GO:0006657; GO:0005829; GO:0005789; GO:0005737; GO:0005625; GO:0004105
chr11:3696239-3847582	NUP98	NM_016320	159.13	142.159	1.11938	0.982422	ko03013		GO:0055085; GO:0051028; GO:0044419; GO:0031965; GO:0031080; GO:0017056; GO:0016032; GO:0016020; GO:0015758; GO:0015031; GO:0010827; GO:0008645; GO:0006999; GO:0006913; GO:0006260; GO:0005975; GO:0005829; GO:0005654; GO:0005643; GO:0005635; GO:0005634; GO:0005515; GO:0005215; GO:0000776; GO:0000278; GO:0000236; GO:0000087; GO:0000059
chr20:461700-524482	CSNK2A1	NM_177559	140.928	125.936	1.11904	0.98439	ko04712; ko04310; ko04530; ko04520		GO:0071174; GO:0061077; GO:0051879; GO:0050790; GO:0047485; GO:0046777; GO:0043154; GO:0031519; GO:0030177; GO:0019888; GO:0016772; GO:0016581; GO:0016580; GO:0008013; GO:0007411; GO:0007165; GO:0007049; GO:0006468; GO:0006355; GO:0005886; GO:0005829; GO:0005634; GO:0005524; GO:0005515; GO:0004674; GO:0000166
chr2:223725714-223809153	ACSL3	NM_004457	129.766	116.059	1.1181	0.983413	ko04146; ko00071; ko04920; ko03320		GO:0044255; GO:0035338; GO:0019432; GO:0016874; GO:0016021; GO:0016020; GO:0014070; GO:0007584; GO:0007420; GO:0006633; GO:0005792; GO:0005789; GO:0005783; GO:0005778; GO:0005777; GO:0005741; GO:0005739; GO:0005524; GO:0004467; GO:0004321; GO:0000166
chr20:60757838-60778612	GTPBP5	NM_015666	64.8304	58.0048	1.11767	0.988914		GTP binding protein 5 (putative)	GO:0042254; GO:0005739; GO:0005622; GO:0005525; GO:0003924; GO:0000287; GO:0000166
chr19:55476636-55512510	NLRP2	NM_001174083	44.0736	39.4411	1.11745	0.989566			GO:0050718; GO:0043280; GO:0032090; GO:0005737; GO:0005524; GO:0005515; GO:0000166
chr1:19638739-19655809	PQLC2	NM_017765	36.7652	32.9082	1.1172	0.990377			GO:0016021; GO:0016020
chr11:417925-420296	ANO9	NM_001012302	49.2243	44.0852	1.11657	0.990631		anoctamin 9	GO:0034707; GO:0016021; GO:0016020; GO:0006811; GO:0005254; GO:0005216
chr10:320129-462040	DIP2C	NM_014974	38.7535	34.7235	1.11606	0.988914			GO:0008134; GO:0005634; GO:0003824
chr20:44978176-44993064	SLC35C2	NM_173179	93.1243	83.4641	1.11574	0.989393			GO:0016021; GO:0016020; GO:0006810
chr8:33356232-33358670	C8orf41	NM_001102401	91.483	82.028	1.11527	0.990243			GO:0005488
chr12:19282559-19529334	PLEKHA5	NM_001143821	18.9827	17.0224	1.11516	0.990322			GO:0008150; GO:0005575; GO:0005545; GO:0005515
chr19:54677105-54693733	MBOAT7	NM_024298	174.401	156.471	1.11459	0.98439	ko00564		GO:0016747; GO:0016021; GO:0016020; GO:0008654
chr19:7804878-7812464	CD209	NM_021155	1.43178	1.28512	1.11412	1	ko04145		GO:0046968; GO:0046872; GO:0046795; GO:0046790; GO:0045087; GO:0044419; GO:0042605; GO:0035556; GO:0019882; GO:0019079; GO:0019062; GO:0019048; GO:0016021; GO:0016020; GO:0009988; GO:0007159; GO:0007157; GO:0007155; GO:0006897; GO:0005886; GO:0005737; GO:0005622; GO:0005576; GO:0005537; GO:0005529; GO:0004872
chr1:41154751-41237275	NFYC	NM_001142590	117.445	105.485	1.11338	0.989566	ko04612		GO:0045893; GO:0043565; GO:0016602; GO:0006457; GO:0006357; GO:0006355; GO:0005634; GO:0005622; GO:0005515; GO:0003713; GO:0003700; GO:0003677
chr4:71570418-71674336	RUFY3	NM_001037442	5.95583	5.34972	1.1133	0.991478			GO:0050771; GO:0030426; GO:0030175; GO:0030154; GO:0007399; GO:0007275
chr3:15083913-15106821	MRPS25	NM_022497	56.9915	51.2076	1.11295	0.985674			GO:0006412; GO:0005840; GO:0005763; GO:0005739; GO:0005737; GO:0003735
chr9:131084790-131096351	COQ4	NM_016035	160.566	144.382	1.11209	0.988914			GO:0016020; GO:0006744; GO:0005743; GO:0005739
chr13:52586486-52607797	ALG11	NM_001004127	40.6664	36.5785	1.11176	0.989393	ko00510		GO:0044267; GO:0043687; GO:0018279; GO:0016757; GO:0016021; GO:0016020; GO:0009058; GO:0006488; GO:0005789; GO:0005783; GO:0004377
chr2:70187220-70314147	LOC400960	NR_033872	6.83389	6.14913	1.11136	0.991719
chr6:158653204-158932860	TULP4	NM_020245	17.3809	15.6405	1.11128	0.989566			GO:0035556; GO:0007584; GO:0006355; GO:0005737; GO:0003700
chr19:55555507-55580914	RDH13	NM_138412	51.4109	46.2712	1.11108	0.990243			GO:0016491; GO:0005739; GO:0000166
chr1:205055197-205091150	RBBP5	NM_005057	36.5749	32.9372	1.11044	0.989566			GO:0071339; GO:0051568; GO:0048188; GO:0044212; GO:0043627; GO:0042800; GO:0035097; GO:0035064; GO:0016568; GO:0006355; GO:0005634; GO:0005515
chr15:100106129-100256652	MEF2A	NM_001171894	14.9241	13.4406	1.11037	0.991478			GO:0071277; GO:0070375; GO:0061337; GO:0055005; GO:0051403; GO:0051149; GO:0048813; GO:0048311; GO:0048011; GO:0046982; GO:0046332; GO:0045944; GO:0045087; GO:0043565; GO:0042826; GO:0042692; GO:0035035; GO:0034142; GO:0034138; GO:0034134; GO:0034130; GO:0033613; GO:0019901; GO:0008063; GO:0007517; GO:0007507; GO:0007399; GO:0007275; GO:0006915; GO:0006366; GO:0006351; GO:0005654; GO:0005634; GO:…
chr22:38615297-38668670	TMEM184B	NM_001195072	201.013	181.111	1.10989	0.986572			GO:0016021; GO:0016020
chr11:118477212-118528741	PHLDB1	NM_015157	54.737	49.3239	1.10975	0.989138
chr17:56160779-56175182	DYNLL2	NM_080677	144.741	130.476	1.10933	0.984628	ko04962		GO:0030286; GO:0016459; GO:0008633; GO:0008629; GO:0008092; GO:0008039; GO:0007017; GO:0006915; GO:0006810; GO:0005886; GO:0005874; GO:0005856; GO:0005829; GO:0005813; GO:0005737; GO:0003774
chr2:99061307-99198294	INPP4A	NM_001134224	28.4319	25.6431	1.10875	0.990843	ko04070; ko00562		GO:0034597; GO:0016787; GO:0016316; GO:0007165
chr10:99205929-99217127	ZDHHC16	NM_198046	135	121.768	1.10867	0.989566			GO:0046872; GO:0016746; GO:0016021; GO:0016020; GO:0008270; GO:0006915; GO:0005789; GO:0005783
chr6:31707724-31730455	MSH5	NM_002441	43.302	39.0635	1.1085	0.990322			GO:0051026; GO:0045143; GO:0032300; GO:0030983; GO:0008094; GO:0007136; GO:0007131; GO:0007126; GO:0006298; GO:0005524; GO:0003684; GO:0000795; GO:0000710; GO:0000166
chr11:47586981-47600884	PTPMT1	NM_175732	103.808	93.7144	1.10771	0.989566			GO:0046855; GO:0016787; GO:0016020; GO:0008138; GO:0006470; GO:0005743; GO:0005739; GO:0004725; GO:0004439
chr6:131895105-131949370	MED23	NM_015979	32.6338	29.4653	1.10753	0.990243			GO:0016592; GO:0010467; GO:0006367; GO:0006357; GO:0006355; GO:0005667; GO:0005654; GO:0005634; GO:0005515; GO:0003713
chr8:23047734-23083005	TNFRSF10A	NM_003844	120.144	108.479	1.10753	0.988914	ko04060; ko04650; ko04210		GO:0071260; GO:0045569; GO:0016021; GO:0016020; GO:0008625; GO:0008134; GO:0007250; GO:0007165; GO:0006919; GO:0006917; GO:0005515; GO:0005035; GO:0004872
chr3:42132745-42267310	TRAK1	NM_001042646	43.7116	39.4704	1.10745	0.989566		trafficking protein, kinesin binding 1	GO:0050811; GO:0008333; GO:0006605; GO:0006493; GO:0006357; GO:0005769; GO:0005739; GO:0005737; GO:0005634; GO:0005515
chr5:466836-467543	EXOC3	NM_007277	174.46	157.644	1.10667	0.990843	ko04530		GO:0030667; GO:0015031; GO:0006887
chr2:240953508-240964819	NDUFA10	NM_004544	425.997	385.044	1.10636	0.988355	ko05016; ko00190; ko05010; ko05012		GO:0070469; GO:0042493; GO:0022904; GO:0016773; GO:0008137; GO:0006810; GO:0006139; GO:0006120; GO:0005759; GO:0005747; GO:0005743; GO:0005739; GO:0005524
chr1:44461099-44497271	SLC6A9	NM_001024845	27.1198	24.5162	1.1062	0.990631			GO:0055085; GO:0015375; GO:0015293; GO:0006836; GO:0006810; GO:0005887; GO:0005886; GO:0005624; GO:0005328; GO:0003333
chr1:6341070-6341351	ACOT7	NM_181866	1826.83	1653.83	1.10461	0.990243	ko01040		GO:0016787; GO:0016290; GO:0006629; GO:0005829; GO:0005739; GO:0005737; GO:0004091; GO:0003824; GO:0000062
chr7:75614091-75623992	TMEM120A	NM_031925	123.406	111.823	1.10358	0.989138			GO:0016021; GO:0016020; GO:0008150; GO:0005575; GO:0003674
chr9:121037-179075	CBWD1	NM_001145355	546.2	495.525	1.10227	0.988355			GO:0005524; GO:0000166
chr15:36871778-37102449	C15orf41	NM_001130010	14.8617	13.4982	1.10101	0.992504
chr5:31400600-31532282	RNASEN	NM_013235	47.8318	43.4763	1.10018	0.990009		drosha, ribonuclease type III	GO:0046872; GO:0042254; GO:0031047; GO:0016787; GO:0016075; GO:0006396; GO:0005730; GO:0005654; GO:0005634; GO:0005622; GO:0005515; GO:0004525; GO:0004519; GO:0003725
chr9:95087295-95379467	CENPP	NM_001012267	23.2176	21.1317	1.09871	0.990843			GO:0034080; GO:0006334; GO:0005829; GO:0005694; GO:0005654; GO:0005634; GO:0000775; GO:0000278; GO:0000236; GO:0000087
chr17:6347794-6354384	FAM64A	NM_019013	101.95	92.799	1.09861	0.990377			GO:0005730; GO:0005515
chr7:45039344-45116069	CCM2	NM_031443	95.1629	86.7895	1.09648	0.991121			GO:0061154; GO:0051403; GO:0007229; GO:0005737; GO:0005515; GO:0001570
chr16:89724439-89737732	C16orf55	NM_153025	41.9223	38.2394	1.09631	0.991478
chr10:5903688-5931860	ANKRD16	NM_019046	18.3734	16.7605	1.09623	0.992518
chr19:4501197-4517716	PLIN4	NM_001080400	17.1078	15.6065	1.0962	0.991478		perilipin 4	GO:0005886; GO:0005811; GO:0005737
chr5:68389796-68426056	SLC30A5	NM_022902	62.9828	57.4662	1.096	0.990243			GO:0071577; GO:0055085; GO:0030667; GO:0030141; GO:0016324; GO:0016021; GO:0016020; GO:0010155; GO:0010043; GO:0008324; GO:0008270; GO:0006882; GO:0006829; GO:0006824; GO:0005887; GO:0005794; GO:0005730; GO:0005634; GO:0005624; GO:0005385; GO:0000139
chr11:117156413-117187001	BACE1	NM_012104	14.3453	13.0891	1.09597	0.991581	ko05010		GO:0050435; GO:0031410; GO:0030659; GO:0030424; GO:0019899; GO:0016021; GO:0016020; GO:0009986; GO:0008798; GO:0008233; GO:0006509; GO:0006508; GO:0005887; GO:0005802; GO:0005794; GO:0005783; GO:0005768; GO:0005624; GO:0004190
chr15:44853122-44955876	SPG11	NM_025137	37.9067	34.5958	1.0957	0.989566			GO:0016021; GO:0008219; GO:0005886; GO:0005829; GO:0005737; GO:0005730; GO:0005634; GO:0005515
chr20:18118498-18169080	CSRP2BP	NM_020536	42.2846	38.5964	1.09556	0.990843			GO:0043966; GO:0030274; GO:0022402; GO:0009790; GO:0008152; GO:0008080; GO:0005737; GO:0005671; GO:0005634; GO:0005515
chr8:38268638-38326352	FGFR1	NM_001174064	40.2998	36.7868	1.0955	0.990322	ko05200; ko05215; ko04810; ko04010; ko04520; ko05218		GO:0048705; GO:0048602; GO:0048015; GO:0046777; GO:0045666; GO:0045595; GO:0043410; GO:0043406; GO:0043009; GO:0042803; GO:0018108; GO:0017134; GO:0016477; GO:0016023; GO:0016021; GO:0014068; GO:0010863; GO:0010518; GO:0008543; GO:0008286; GO:0008284; GO:0008201; GO:0007411; GO:0006468; GO:0006355; GO:0005887; GO:0005886; GO:0005829; GO:0005737; GO:0005634; GO:0005576; GO:0005524; GO:0005515; GO:…
chr11:6238215-6255941	FAM160A2	NM_032127	60.6269	55.3453	1.09543	0.990843			GO:0070695; GO:0045022; GO:0015031; GO:0008333; GO:0007040; GO:0007032; GO:0005515
chr19:21933379-21936240	LOC641367	NR_024523	4.62994	4.22832	1.09498	0.997485
chr11:6496880-6502788	ARFIP2	NM_012402	198.989	181.784	1.09465	0.989393			GO:0048365; GO:0031529; GO:0030742; GO:0030036; GO:0030032; GO:0007264; GO:0006928; GO:0005938; GO:0005886; GO:0005737; GO:0005625; GO:0005525; GO:0005515; GO:0001726
chr16:4897486-4987198	UBN1	NM_001079514	50.0259	45.737	1.09377	0.989566			GO:0044419; GO:0030054; GO:0016605; GO:0016568; GO:0010923; GO:0006357; GO:0005923; GO:0005654; GO:0005634; GO:0003700; GO:0003677
chrX:48830093-48858675	GRIPAP1	NM_020137	46.3974	42.4349	1.09338	0.991478			GO:0008150; GO:0005769; GO:0005575; GO:0003674
chr12:45609769-45826134	ANO6	NM_001142680	66.3446	60.6817	1.09332	0.989566			GO:0097045; GO:0034707; GO:0016021; GO:0006811; GO:0005886; GO:0005254; GO:0005216; GO:0002543
chr1:236686738-236767841	HEATR1	NM_018072	71.83	65.7062	1.0932	0.989393			GO:0030529; GO:0006364; GO:0005730; GO:0005634; GO:0005488
chr15:32907690-32931868	ARHGAP11A	NM_199357	83.5696	76.4536	1.09308	0.989566			GO:0051056; GO:0007264; GO:0007165; GO:0005829; GO:0005622; GO:0005096
chr20:743802-749236	C20orf54	NM_033409	43.9761	40.2618	1.09225	0.992504		chromosome 20 open reading frame 54	GO:0034605; GO:0032218; GO:0032217; GO:0007605; GO:0006810; GO:0005887; GO:0005886
chrX:154289896-154299547	MTCP1	NM_001018025	15.3053	14.0368	1.09037	0.994544			GO:0008283; GO:0005739
chr6:36935916-36953959	MTCH1	NM_014341	361.491	331.717	1.08976	0.989393			GO:0045161; GO:0043065; GO:0016021; GO:0016020; GO:0009966; GO:0006919; GO:0006810; GO:0005743; GO:0005739; GO:0005622; GO:0005515
chr19:39390605-39399534	NFKBIB	NM_002503	142.293	130.625	1.08932	0.991478	ko05140; ko04622; ko04662; ko04062; ko04623; ko05131; ko04920; ko04660; ko04722; ko05145; ko04621		GO:0051092; GO:0045087; GO:0034142; GO:0034138; GO:0034134; GO:0034130; GO:0008063; GO:0007253; GO:0007165; GO:0006351; GO:0005829; GO:0005737; GO:0005634; GO:0005515; GO:0004871; GO:0003713; GO:0002756; GO:0002755; GO:0002224
chr2:220035675-220041702	C2orf24	NM_015680	93.4879	85.837	1.08913	0.990322			GO:0019901; GO:0016021; GO:0016020; GO:0000079
chr1:6521172-6580069	PLEKHG5	NM_198681	21.7467	19.9684	1.08906	0.991478			GO:0051056; GO:0048471; GO:0048011; GO:0043123; GO:0035023; GO:0008624; GO:0008219; GO:0007264; GO:0007165; GO:0006915; GO:0005829; GO:0005737; GO:0005622; GO:0005089; GO:0004871
chr1:201452657-201465701	CSRP1	NM_001193571	321.8	295.593	1.08866	0.989566			GO:0046872; GO:0008270; GO:0005634
chr17:73625550-73663269	RECQL5	NM_004259	49.743	45.7062	1.08832	0.992504			GO:0031965; GO:0016787; GO:0008026; GO:0006310; GO:0006281; GO:0006259; GO:0005737; GO:0005730; GO:0005654; GO:0005634; GO:0005524; GO:0003678; GO:0003676; GO:0000166
chrX:41374186-41782906	CASK	NM_003688	14.7736	13.5765	1.08817	0.991671	ko04530		GO:0015629; GO:0007155; GO:0005886; GO:0005737; GO:0005634; GO:0005524; GO:0005516; GO:0005515; GO:0004674; GO:0004385; GO:0000166
chr11:74699949-74719594	NEU3	NM_006656	31.2751	28.7567	1.08758	0.992453	ko00600; ko00511	sialidase 3 (membrane sialidase)	GO:0052796; GO:0052795; GO:0052794; GO:0016997; GO:0016798; GO:0006689; GO:0005975; GO:0005887; GO:0005886; GO:0003824
chr17:18218588-18266867	SMCR8	NM_144775	36.3156	33.4195	1.08666	0.990322		Smith-Magenis syndrome chromosome region, candidate 8
chr8:94744257-94748752	RBM12B	NM_203390	52.2892	48.1257	1.08651	0.990843		RNA binding motif protein 12B	GO:0003723; GO:0000166
chr10:121332954-121356541	TIAL1	NM_001033925	143.174	131.823	1.08611	0.989566			GO:0010494; GO:0006952; GO:0006917; GO:0006915; GO:0006357; GO:0005764; GO:0005737; GO:0005634; GO:0003723; GO:0003676; GO:0000166
chr5:33987090-34008220	AMACR	NM_001167595	7.54173	6.94734	1.08556	0.997515	ko04146; ko00120		GO:0044255; GO:0033540; GO:0016853; GO:0008206; GO:0008111; GO:0006699; GO:0005782; GO:0005777; GO:0005739
chr1:161169104-161184185	NDUFS2	NM_004550	228.289	210.516	1.08443	0.990238	ko05016; ko00190; ko05010; ko05012		GO:0070469; GO:0051539; GO:0051287; GO:0048038; GO:0046872; GO:0022904; GO:0016020; GO:0009055; GO:0008137; GO:0006979; GO:0006810; GO:0006120; GO:0005747; GO:0005743; GO:0005739; GO:0005515; GO:0003954
chr8:356807-419927	FBXO25	NM_183421	23.2102	21.4114	1.08401	0.99457			GO:0019005; GO:0016567; GO:0005634; GO:0004842; GO:0003779; GO:0000151
chr7:102715327-102740205	ARMC10	NM_031905	69.4054	64.0609	1.08343	0.991478			GO:0040008; GO:0016021; GO:0016020; GO:0005789; GO:0005783; GO:0005739; GO:0005488
chr19:51461886-51472958	KLK6	NM_002774	665.941	614.691	1.08338	0.989566			GO:0045745; GO:0045595; GO:0042982; GO:0042552; GO:0042445; GO:0042246; GO:0030574; GO:0016540; GO:0009611; GO:0008233; GO:0007417; GO:0006508; GO:0005792; GO:0005783; GO:0005739; GO:0005737; GO:0005730; GO:0005634; GO:0005576; GO:0005515; GO:0004252
chr8:21964310-21966932	NUDT18	NM_024815	27.037	24.962	1.08313	0.994876		nudix (nucleoside diphosphate linked moiety X)-type motif 18	GO:0046872; GO:0016787; GO:0005515
chr7:128594233-128697293	tcag7.1015	NR_002187	180.981	167.164	1.08266	0.990322
chr11:74459903-74660625	RNF169	NM_001098638	14.6826	13.5617	1.08265	0.992504		ring finger protein 169	GO:0046872; GO:0008270
chr10:14948869-14996094	DCLRE1C	NM_001033858	16.5292	15.2688	1.08255	0.99457	ko03450; ko05340		GO:0051276; GO:0030183; GO:0016787; GO:0010212; GO:0008409; GO:0006310; GO:0006302; GO:0005634; GO:0004519; GO:0000723; GO:0000014
chr5:176732500-176739292	MXD3	NM_031300	252.074	232.874	1.08245	0.989566			GO:0045892; GO:0005634; GO:0003677
chr9:130928343-130953868	CIZ1	NM_001131015	260.93	241.19	1.08184	0.989566			GO:0046872; GO:0032298; GO:0008270; GO:0005634; GO:0005622; GO:0005515; GO:0003676
chrX:153715649-153719002	SLC10A3	NM_001142391	102.932	95.1537	1.08174	0.991478			GO:0042221; GO:0032526; GO:0016021; GO:0016020; GO:0015711; GO:0015293; GO:0008508; GO:0006814; GO:0006810
chr1:201951747-201952245	RNPEP	NM_020216	340.011	314.523	1.08104	0.992754			GO:0070006; GO:0060041; GO:0050897; GO:0046872; GO:0045776; GO:0042277; GO:0030141; GO:0019717; GO:0019370; GO:0009897; GO:0008270; GO:0008235; GO:0008233; GO:0007568; GO:0006508; GO:0005886; GO:0005794; GO:0005625; GO:0005615; GO:0005576; GO:0005507; GO:0004301; GO:0004177
chr11:65542086-65547822	DKFZp761E198	NM_138368	36.8673	34.1302	1.0802	0.991478		DKFZp761E198 protein	GO:0005515
chr16:74481324-74641042	GLG1	NM_012201	220.089	203.766	1.08011	0.989566	ko04514		GO:0060349; GO:0048603; GO:0032330; GO:0031012; GO:0030512; GO:0016021; GO:0016020; GO:0010955; GO:0005797; GO:0005794; GO:0005792; GO:0005102; GO:0000139
chr1:179832283-179846942	TOR1AIP2	NM_022347	87.8111	81.3034	1.08004	0.991478			GO:0016021; GO:0016020; GO:0005789; GO:0005783
chr19:16512649-16582780	EPS15L1	NM_021235	61.7521	57.3631	1.07651	0.993099		epidermal growth factor receptor pathway substrate 15-like 1	GO:0042059; GO:0007173; GO:0006897; GO:0005905; GO:0005886; GO:0005634; GO:0005509
chr6:17760118-17987800	KIF13A	NM_022113	1.53316	1.42435	1.07639	1			GO:0072383; GO:0043001; GO:0035459; GO:0032588; GO:0032438; GO:0030496; GO:0016020; GO:0010008; GO:0008333; GO:0007049; GO:0007018; GO:0006886; GO:0005874; GO:0005856; GO:0005813; GO:0005794; GO:0005768; GO:0005737; GO:0005622; GO:0005524; GO:0005515; GO:0003777; GO:0000910; GO:0000166
chr6:32152509-32157289	PBX2	NM_002586	109.518	101.815	1.07566	0.991478		pre-B-cell leukemia homeobox 2	GO:0045944; GO:0043565; GO:0030326; GO:0009954; GO:0008134; GO:0005667; GO:0005634; GO:0003700; GO:0003682
chr20:61536349-61557903	DIDO1	NM_033081	90.7314	84.3809	1.07526	0.991671			GO:0046872; GO:0008270; GO:0006915; GO:0006351; GO:0005737; GO:0005634
chr15:66786167-66790146	SNAPC5	NM_006049	145.212	135.084	1.07498	0.99457			GO:0006384; GO:0006383; GO:0006366; GO:0006355; GO:0005654; GO:0005634; GO:0003700
chr22:18317100-18507325	MICAL3	NM_015241	26.1262	24.305	1.07493	0.99457			GO:0046872; GO:0016491; GO:0008270; GO:0005856; GO:0005737
chr9:127177117-127177223	PSMB7	NM_002799	57605	53629.5	1.07413	0.992518	ko03050		GO:0051603; GO:0051439; GO:0051437; GO:0051436; GO:0044419; GO:0042981; GO:0034641; GO:0031145; GO:0016071; GO:0016070; GO:0016032; GO:0008233; GO:0006977; GO:0006915; GO:0006521; GO:0005839; GO:0005829; GO:0005737; GO:0005654; GO:0005634; GO:0005515; GO:0004298; GO:0002474; GO:0000502; GO:0000278; GO:0000216; GO:0000209; GO:0000084; GO:0000082; GO:0000075
chr22:41921802-41940476	POLR3H	NM_138338	226.56	211.264	1.0724	0.990406	ko04623; ko00230; ko00240; ko03020		GO:0045087; GO:0009615; GO:0006386; GO:0006385; GO:0006383; GO:0006139; GO:0005666; GO:0005654; GO:0005634; GO:0003899; GO:0003677
chr9:125001833-125085743	MRRF	NM_138777	220.965	206.088	1.07219	0.991478			GO:0032790; GO:0006412; GO:0006355; GO:0005739
chr1:75171169-75199092	CRYZ	NM_001130042	87.0939	81.2304	1.07218	0.992754			GO:0070404; GO:0070402; GO:0051289; GO:0043231; GO:0042178; GO:0016491; GO:0008270; GO:0007601; GO:0005829; GO:0005794; GO:0005737; GO:0005625; GO:0003960; GO:0003730; GO:0003723; GO:0000166
chr4:103716903-103790492	UBE2D3	NM_181892	303.584	283.546	1.07067	0.990843	ko04120; ko04141		GO:0070979; GO:0070936; GO:0045087; GO:0043161; GO:0032480; GO:0030509; GO:0016881; GO:0016874; GO:0016567; GO:0010008; GO:0007179; GO:0006915; GO:0006513; GO:0006511; GO:0006464; GO:0006281; GO:0005886; GO:0005829; GO:0005768; GO:0005654; GO:0005524; GO:0005515; GO:0004842; GO:0000209; GO:0000166
chr8:124084882-124164393	WDR67	NM_145647	20.9464	19.5688	1.0704	0.996605			GO:0005813; GO:0005622; GO:0005097
chr11:10476661-10529126	AMPD3	NM_001025390	37.6554	35.1854	1.0702	0.99457	ko00230		GO:0055086; GO:0046872; GO:0043101; GO:0016787; GO:0009168; GO:0009117; GO:0006196; GO:0006144; GO:0005829; GO:0003876
chr16:68331139-68391173	SLC7A6OS	NM_032178	62.289	58.2105	1.07006	0.991975			GO:0015031; GO:0005737; GO:0005634
chr2:210867306-211036120	C2orf67	NM_152519	8.93364	8.35063	1.06982	0.997482
chr1:155293727-155300909	RUSC1	NM_001105203	98.8949	92.4633	1.06956	0.993099			GO:0005737; GO:0005634; GO:0005070
chr17:40169593-40190044	NKIRAS2	NM_001144929	144.069	134.768	1.06901	0.992183			GO:0016020; GO:0007264; GO:0007249; GO:0007165; GO:0006184; GO:0005737; GO:0005575; GO:0005525; GO:0003924; GO:0000166
chrX:67718337-67755251	YIPF6	NM_173834	52.4697	49.0943	1.06875	0.992518			GO:0016021; GO:0016020; GO:0005783
chr20:57466142-57466924	GNAS	NM_000516	1143.69	1071.06	1.06781	0.991478	ko04970; ko04912; ko05146; ko04540; ko05110; ko04962; ko04972; ko04971; ko05414; ko04270; ko05142; ko04020; ko04730; ko04916; ko04742	GNAS complex locus	GO:0071514; GO:0071377; GO:0055085; GO:0051216; GO:0050796; GO:0048701; GO:0046907; GO:0046872; GO:0045672; GO:0045669; GO:0043588; GO:0042493; GO:0040032; GO:0035264; GO:0035255; GO:0035116; GO:0032588; GO:0031852; GO:0031683; GO:0031410; GO:0031234; GO:0031224; GO:0030168; GO:0030133; GO:0019001; GO:0009791; GO:0009306; GO:0007610; GO:0007608; GO:0007606; GO:0007596; GO:0007565; GO:0007191; GO:…
chr16:68119278-68270136	ESRP2	NM_024939	45.203	42.3451	1.06749	0.992518			GO:0043484; GO:0006397; GO:0005634; GO:0003729; GO:0000166
chr7:56131916-56148365	SUMF2	NM_015411	419.517	393.001	1.06747	0.991478		sulfatase modifying factor 2	GO:0046872; GO:0005788; GO:0005783; GO:0005488
chr16:57220209-57273703	RSPRY1	NM_133368	47.4027	44.464	1.06609	0.996233			GO:0046872; GO:0008270; GO:0005576
chr17:1324100-1359544	CRK	NM_016823	139.664	131.018	1.06599	0.991478	ko04810; ko04010; ko05100; ko04666; ko05211; ko05200; ko05131; ko04062; ko04722; ko04910; ko04510; ko04012; ko05220		GO:0048013; GO:0048011; GO:0046875; GO:0045309; GO:0042169; GO:0035020; GO:0032956; GO:0032319; GO:0008286; GO:0007596; GO:0006357; GO:0005886; GO:0005829; GO:0005768; GO:0005737; GO:0005634; GO:0005515; GO:0005070; GO:0000186
chr22:24035176-24041363	RGL4	NM_153615	15.9791	14.9924	1.06581	0.997694			GO:0016023; GO:0007264; GO:0005622; GO:0005085
chr12:108079542-108107014	PWP1	NM_007062	176.192	165.336	1.06566	0.991719			GO:0006351; GO:0005634
chr12:69864128-69973562	FRS2	NM_006654	13.549	12.7158	1.06552	0.996701	ko04722	fibroblast growth factor receptor substrate 2	GO:0060527; GO:0050678; GO:0048011; GO:0046619; GO:0030900; GO:0019211; GO:0012505; GO:0008595; GO:0008543; GO:0008286; GO:0007405; GO:0007202; GO:0007186; GO:0007185; GO:0005887; GO:0005886; GO:0005768; GO:0005737; GO:0005624; GO:0005515; GO:0005168; GO:0005158; GO:0005104; GO:0005068; GO:0003281; GO:0001759; GO:0001702; GO:0000187; GO:0000186
chrX:54466813-54522599	FGD1	NM_004463	11.2926	10.6043	1.06491	0.997694	ko04810		GO:0051056; GO:0048011; GO:0046872; GO:0046847; GO:0043088; GO:0035023; GO:0031267; GO:0030036; GO:0030027; GO:0009887; GO:0008624; GO:0008360; GO:0007275; GO:0007264; GO:0007165; GO:0007010; GO:0006915; GO:0005886; GO:0005856; GO:0005829; GO:0005794; GO:0005737; GO:0005634; GO:0005622; GO:0005089; GO:0005085; GO:0001726
chr1:245012956-245027884	HNRNPU	NM_004501	373.087	350.411	1.06471	0.991478	ko03040		GO:0071013; GO:0070937; GO:0070934; GO:0030530; GO:0030529; GO:0010467; GO:0009986; GO:0008380; GO:0006396; GO:0005737; GO:0005654; GO:0005634; GO:0005524; GO:0005515; GO:0003723; GO:0003677; GO:0003676; GO:0000398; GO:0000166
chr8:38131681-38239826	WHSC1L1	NM_023034	29.8836	28.0727	1.06451	0.99457	ko00310	Wolf-Hirschhorn syndrome candidate 1-like 1	GO:0046872; GO:0034968; GO:0030154; GO:0018024; GO:0016740; GO:0016571; GO:0016568; GO:0016049; GO:0008270; GO:0008168; GO:0006355; GO:0005694; GO:0005634
chr6:132029580-132032157	CTAGE9	NM_001145659	28.8261	27.1197	1.06292	0.997694			GO:0016021; GO:0016020
chr3:44379564-44450940	C3orf23	NM_173826	16.4738	15.5018	1.0627	0.997694			GO:0005739
chr2:74056085-74100783	STAMBP	NM_006463	41.0576	38.6595	1.06203	0.994197	ko04144		GO:0046872; GO:0008284; GO:0008237; GO:0008233; GO:0007259; GO:0006916; GO:0006508; GO:0005886; GO:0005769; GO:0005737; GO:0005730; GO:0005634; GO:0005515
chr22:31368520-31375381	TUG1	NR_002323	72.0316	67.8336	1.06189	0.992518
chr1:31532003-31532425	PUM1	NM_001020658	390.918	368.298	1.06142	0.997694			GO:0016044; GO:0006892; GO:0006417; GO:0005829; GO:0005737; GO:0005488; GO:0003723
chr2:231921559-232037541	PSMD1	NM_002807	388.798	366.342	1.0613	0.991478	ko03050		GO:0051439; GO:0051437; GO:0051436; GO:0042981; GO:0042176; GO:0034641; GO:0031145; GO:0030234; GO:0016071; GO:0016070; GO:0016032; GO:0006977; GO:0006915; GO:0006521; GO:0005838; GO:0005829; GO:0005654; GO:0005488; GO:0002474; GO:0000502; GO:0000278; GO:0000216; GO:0000209; GO:0000084; GO:0000082; GO:0000075
chr2:162267773-162268223	PSMD14	NM_005805	405.975	382.528	1.06129	0.997689	ko03050		GO:0070628; GO:0070536; GO:0061136; GO:0061133; GO:0051439; GO:0051437; GO:0051436; GO:0046872; GO:0042981; GO:0034641; GO:0031145; GO:0016071; GO:0016070; GO:0016032; GO:0010950; GO:0008237; GO:0008233; GO:0006977; GO:0006915; GO:0006521; GO:0006511; GO:0006508; GO:0005829; GO:0005654; GO:0004221; GO:0002474; GO:0000502; GO:0000278; GO:0000216; GO:0000209; GO:0000084; GO:0000082; GO:0000075
chr14:51186480-51297879	NIN	NM_020921	29.1519	27.4699	1.06123	0.997184		ninein (GSK3B interacting protein)	GO:0090222; GO:0051642; GO:0034454; GO:0005874; GO:0005856; GO:0005814; GO:0005813; GO:0005737; GO:0005525; GO:0005515; GO:0005509; GO:0000166
chr22:40766594-41032712	MKL1	NM_020831	34.3551	32.3919	1.06061	0.996473			GO:0051145; GO:0045944; GO:0043522; GO:0006916; GO:0005737; GO:0005730; GO:0005634; GO:0005515; GO:0003785; GO:0003713; GO:0003676
chr3:48955220-48956818	C3orf71	NM_001123040	10.5107	9.91053	1.06056	0.997694			GO:0016021; GO:0016020
chr11:76839309-76926286	MYO7A	NM_000260	2.02122	1.90581	1.06056	1			GO:0060088; GO:0051904; GO:0051875; GO:0050957; GO:0050953; GO:0048563; GO:0046983; GO:0045202; GO:0042491; GO:0042472; GO:0042470; GO:0042462; GO:0032420; GO:0030048; GO:0030030; GO:0019904; GO:0016459; GO:0016324; GO:0007605; GO:0007601; GO:0007040; GO:0005856; GO:0005829; GO:0005765; GO:0005737; GO:0005524; GO:0005516; GO:0005515; GO:0003779; GO:0003774; GO:0001917; GO:0001845; GO:0001750; GO:…
chr3:52109248-52188706	WDR51A	NM_001161581	53.924	50.8585	1.06028	0.997694			GO:0042995; GO:0005932; GO:0005856; GO:0005814; GO:0005813; GO:0005737
chr1:104068568-104122151	RNPC3	NM_017619	9.06382	8.55412	1.05959	0.997694			GO:0008380; GO:0006397; GO:0005689; GO:0005634; GO:0003723; GO:0000166
chr2:228336846-228425938	AGFG1	NM_001135187	42.3906	40.0098	1.05951	0.99383			GO:0046872; GO:0043231; GO:0032312; GO:0030154; GO:0016023; GO:0008270; GO:0008060; GO:0007283; GO:0007275; GO:0006810; GO:0006406; GO:0005794; GO:0005643; GO:0005634; GO:0005515; GO:0003723; GO:0003677
chr1:101455178-101491362	DPH5	NM_001077394	71.0046	67.1544	1.05733	0.997694			GO:0017183; GO:0016740; GO:0008168; GO:0008152; GO:0005575; GO:0004164
chr1:90308994-90401991	LRRC8D	NM_001134479	32.665	30.9005	1.0571	0.997694			GO:0016021; GO:0016020
chr17:38060847-38074965	GSDMB	NM_001165958	25.0496	23.7078	1.0566	0.997694			GO:0005737
chr15:57511654-57580716	TCF12	NM_207037	56.5034	53.4813	1.05651	0.996473			GO:0044212; GO:0030154; GO:0007517; GO:0007399; GO:0007275; GO:0006955; GO:0006357; GO:0006355; GO:0005634; GO:0005515; GO:0003700; GO:0003677
chr3:113666747-113678132	ZDHHC23	NM_173570	24.6027	23.2932	1.05622	0.997694			GO:0046872; GO:0016746; GO:0016021; GO:0016020; GO:0008270
chr17:37793332-37820454	STARD3	NM_001165937	91.8292	86.9807	1.05574	0.996473			GO:0031902; GO:0017127; GO:0016021; GO:0016020; GO:0015485; GO:0008289; GO:0008203; GO:0008202; GO:0006869; GO:0006839; GO:0006810; GO:0006694; GO:0006629; GO:0005768; GO:0005737
chrX:53963112-54070891	PHF8	NM_015107	20.5385	19.4562	1.05563	0.997694			GO:0071558; GO:0071557; GO:0070544; GO:0061188; GO:0051864; GO:0046872; GO:0045943; GO:0045893; GO:0035575; GO:0035574; GO:0035064; GO:0033169; GO:0032454; GO:0032452; GO:0016706; GO:0016702; GO:0016568; GO:0016491; GO:0008270; GO:0007420; GO:0007049; GO:0005730; GO:0005634; GO:0005515; GO:0005506; GO:0003682; GO:0000082
chr3:12598568-12627862	MKRN2	NM_014160	91.1053	86.3605	1.05494	0.99457			GO:0046872; GO:0016874; GO:0008270; GO:0008150; GO:0005622; GO:0003676; GO:0003674
chr11:6518525-6542097	DNHD1	NM_144666	6.40321	6.07059	1.05479	0.997694			GO:0030286; GO:0007018; GO:0003777
chr19:34919267-34962157	UBA2	NM_005499	130.998	124.218	1.05458	0.99457	ko04120		GO:0046982; GO:0046872; GO:0043085; GO:0019948; GO:0016925; GO:0016874; GO:0008134; GO:0008047; GO:0006464; GO:0005634; GO:0005524; GO:0005515; GO:0000166
chr6:122792795-123047518	PKIB	NM_181794	48.4228	45.9305	1.05426	0.997694			GO:0006469; GO:0004862; GO:0004860
chr5:863848-892939	BRD9	NM_023924	91.4845	86.7866	1.05413	0.996605			GO:0008150; GO:0005575; GO:0003676
chr2:242089869-242123063	PPP1R7	NM_002712	157.531	149.465	1.05397	0.996473			GO:0050790; GO:0030234; GO:0008599; GO:0008150; GO:0005737; GO:0005634
chr20:62526425-62567365	DNAJC5	NM_025219	104.306	98.9666	1.05395	0.99457	ko04141		GO:0061202; GO:0051082; GO:0043524; GO:0043008; GO:0042470; GO:0031072; GO:0008219; GO:0008021; GO:0007269; GO:0007268; GO:0006457; GO:0005886; GO:0001948
chr20:48697660-48770335	TMEM189-UBE2V1	NM_199203	403.713	383.052	1.05394	0.992676
chr9:86582997-86595184	HNRNPK	NM_002140	806.683	765.418	1.05391	0.992709	ko03040		GO:0072369; GO:0071013; GO:0048260; GO:0045944; GO:0045716; GO:0044419; GO:0030530; GO:0030529; GO:0010988; GO:0010467; GO:0008380; GO:0007165; GO:0006396; GO:0005737; GO:0005730; GO:0005654; GO:0005634; GO:0005515; GO:0003723; GO:0003697; GO:0003677; GO:0001077; GO:0000978; GO:0000790; GO:0000398
chr16:31711917-31721834	C16orf67	NR_024034	19.95	18.9368	1.0535	0.997694
chrX:49091914-49092151	CCDC22	NM_014008	366.592	347.974	1.0535	0.997694			GO:0008150; GO:0005575; GO:0003674
chr10:24497719-24836772	KIAA1217	NM_019590	20.4724	19.4423	1.05298	0.997694			GO:0048706; GO:0007275; GO:0005737; GO:0003674
chrX:53220502-53254604	KDM5C	NM_004187	89.6687	85.1831	1.05266	0.99457			GO:0046872; GO:0016706; GO:0016702; GO:0016568; GO:0016491; GO:0008270; GO:0008150; GO:0006355; GO:0005634; GO:0005622; GO:0005575; GO:0003677; GO:0003674
chr9:127635603-127639859	ARPC5L	NM_030978	159.099	151.221	1.0521	0.997694	ko05131; ko05130; ko04810; ko05100; ko04666	actin related protein 2/3 complex, subunit 5-like	GO:0030833; GO:0005856; GO:0005737; GO:0003779
chr2:73481785-73496920	FBXO41	NM_001080410	58.9683	56.0541	1.05199	0.995264			GO:0008270; GO:0005622
chr9:35658289-35665278	CCDC107	NM_174923	59.3002	56.413	1.05118	0.997694			GO:0016021; GO:0016020
chr2:85581842-85619028	ELMOD3	NM_001135021	6.88533	6.55178	1.05091	0.997694			GO:0006909; GO:0005856; GO:0005096
chr10:135075919-135090407	ADAM8	NM_001109	1.94455	1.85041	1.05088	1			GO:2000309; GO:0071456; GO:0071133; GO:0071065; GO:0070820; GO:0070245; GO:0051897; GO:0051092; GO:0051044; GO:0050839; GO:0050714; GO:0048247; GO:0045785; GO:0045780; GO:0043621; GO:0043524; GO:0042581; GO:0035419; GO:0033089; GO:0032127; GO:0032010; GO:0030335; GO:0022407; GO:0010954; GO:0009986; GO:0008270; GO:0008237; GO:0008233; GO:0006954; GO:0006508; GO:0005887; GO:0005886; GO:0005737; GO:…
chr7:128578223-128590089	IRF5	NM_001098629	31.5734	30.0477	1.05078	0.997694	ko04620		GO:0060337; GO:0060333; GO:0019221; GO:0005829; GO:0005634; GO:0005515; GO:0003700; GO:0000975
chr10:12171639-12238375	NUDT5	NM_014142	175.594	167.157	1.05047	0.99457	ko00230		GO:0047631; GO:0019303; GO:0019144; GO:0017110; GO:0016787; GO:0009191; GO:0009117; GO:0006139; GO:0005622; GO:0000287
chr22:41994031-42017079	PPPDE2	NM_015704	98.5272	93.8835	1.04946	0.997694
chr20:39969436-39989222	LPIN3	NM_022896	26.5653	25.358	1.04761	0.997694			GO:0016787; GO:0016311; GO:0008195; GO:0006631; GO:0006629; GO:0005634
chr22:35695796-35743987	TOM1	NM_001135732	62.3229	59.5906	1.04585	0.997694			GO:0016197; GO:0016020; GO:0015031; GO:0006897; GO:0006886; GO:0005829; GO:0005769; GO:0005737; GO:0005515
chr4:41362803-41702061	LIMCH1	NM_014988	0.000398762	0.000381591	1.045	1			GO:0046872; GO:0031032; GO:0008270; GO:0003779
chr12:52347163-52390863	ACVR1B	NM_020328	56.9034	54.4541	1.04498	0.997694	ko04060		GO:0048185; GO:0046872; GO:0046777; GO:0046332; GO:0045648; GO:0032927; GO:0032924; GO:0031625; GO:0030308; GO:0019838; GO:0018107; GO:0017002; GO:0016361; GO:0009986; GO:0007178; GO:0007165; GO:0006917; GO:0006468; GO:0006355; GO:0005887; GO:0005886; GO:0005524; GO:0005515; GO:0005024; GO:0004872; GO:0004675; GO:0004674; GO:0000166; GO:0000082
chr3:134204574-134293855	CEP63	NM_025180	32.325	30.9626	1.044	0.997694			GO:0051301; GO:0051225; GO:0042770; GO:0007067; GO:0005856; GO:0005829; GO:0005813; GO:0005737; GO:0005515; GO:0000922; GO:0000278; GO:0000086; GO:0000077
chr22:22652462-22674075	LOC96610	NR_027293	108.704	104.157	1.04366	0.997694
chr8:37594096-37615319	ERLIN2	NM_007175	17.6834	16.9533	1.04307	0.997694		ER lipid raft associated 2	GO:0030433; GO:0016021; GO:0005886; GO:0005789; GO:0005783; GO:0005737; GO:0005515
chr6:24667261-24706536	ACOT13	NM_018473	62.3025	59.8246	1.04142	0.997694			GO:0051289; GO:0047617; GO:0016787; GO:0005739; GO:0005737
chr17:18855477-18908139	FAM83G	NM_001039999	57.9367	55.6552	1.04099	0.997694		family with sequence similarity 83, member G
chrX:101854095-101859087	ARMCX5	NM_001168479	28.9402	27.8074	1.04074	0.997694			GO:0005488
chr22:36536370-36562225	APOL3	NM_145641	0.000127863	0.00012288	1.04055	1			GO:0043123; GO:0042157; GO:0008289; GO:0007165; GO:0006954; GO:0006869; GO:0006810; GO:0005737; GO:0005576; GO:0005575; GO:0005319; GO:0004871
chr20:33462765-33515769	ACSS2	NM_001076552	105.357	101.321	1.03983	0.997694	ko00010; ko00640; ko00720; ko00680; ko00620		GO:0043231; GO:0016874; GO:0016208; GO:0008610; GO:0006805; GO:0006085; GO:0006069; GO:0005829; GO:0005737; GO:0005730; GO:0005634; GO:0005524; GO:0003987; GO:0003824; GO:0000166
chr2:236402735-237040138	AGAP1	NM_001037131	44.463	42.7796	1.03935	0.997694	ko04144		GO:0046872; GO:0032312; GO:0015031; GO:0008270; GO:0008060; GO:0007264; GO:0005737; GO:0005622; GO:0005525; GO:0000166
chr1:17866288-18024370	ARHGEF10L	NM_018125	20.1379	19.3764	1.0393	0.997694			GO:0051496; GO:0035104; GO:0035023; GO:0032321; GO:0005829; GO:0005737; GO:0005622; GO:0005100; GO:0005089; GO:0005085
chr11:12282030-12285332	MICAL2	NM_014632	63.5411	61.161	1.03892	0.997694			GO:0046872; GO:0016491; GO:0008270; GO:0005856; GO:0005737
chr5:176074387-176086059	TSPAN17	NM_012171	112.018	107.919	1.03798	0.997694			GO:0016567; GO:0016021; GO:0016020; GO:0004842; GO:0000151
chr9:116077189-116102620	WDR31	NM_001012361	0.154683	0.14906	1.03772	1
chr20:251523-257378	C20orf96	NM_153269	52.2652	50.3671	1.03769	0.997694
chr7:74306893-74322330	PMS2L5	NR_027775	53.5021	51.5591	1.03768	0.997694			GO:0032389; GO:0030983; GO:0016887; GO:0016446; GO:0007131; GO:0006298; GO:0006200; GO:0005524
chr2:224839764-224903357	SERPINE2	NM_006216	181.233	174.701	1.03739	0.997694			GO:0090331; GO:0048711; GO:0045861; GO:0031594; GO:0031232; GO:0031091; GO:0031012; GO:0030414; GO:0030334; GO:0030195; GO:0030154; GO:0010955; GO:0010951; GO:0010757; GO:0008201; GO:0007399; GO:0007275; GO:0005829; GO:0005615; GO:0005576; GO:0005539; GO:0005515; GO:0005102; GO:0004867
chr12:861713-1020659	WNK1	NM_001184985	71.2375	68.7419	1.0363	0.997694			GO:0050794; GO:0048666; GO:0019902; GO:0010923; GO:0007243; GO:0006811; GO:0006468; GO:0005737; GO:0005524; GO:0005515; GO:0004860; GO:0004674; GO:0000166
chr5:54526979-54528836	CCNO	NM_021147	56.2098	54.282	1.03551	0.997694		cyclin O	GO:0051301; GO:0045008; GO:0019901; GO:0007049; GO:0006285; GO:0006284; GO:0006281; GO:0005654; GO:0005634; GO:0004844; GO:0000079
chr5:102201492-102366809	PAM	NM_000919	230.083	222.301	1.03501	0.997694			GO:0060173; GO:0051384; GO:0046872; GO:0046688; GO:0043204; GO:0042493; GO:0032355; GO:0031418; GO:0030141; GO:0016829; GO:0016021; GO:0016020; GO:0009268; GO:0007507; GO:0007417; GO:0006518; GO:0006464; GO:0005624; GO:0005576; GO:0005515; GO:0005507; GO:0004598; GO:0004504; GO:0001666
chr14:77972352-78083110	SPTLC2	NM_004863	45.0689	43.5515	1.03484	0.997694	ko00600		GO:0046512; GO:0046511; GO:0030170; GO:0030148; GO:0017059; GO:0016769; GO:0016746; GO:0016021; GO:0016020; GO:0009058; GO:0006686; GO:0006665; GO:0005789; GO:0005783; GO:0005739; GO:0004758
chr19:1104648-1106787	GPX4	NM_001039848	1511.44	1460.77	1.03469	0.997694	ko00480		GO:0055114; GO:0047066; GO:0016491; GO:0007275; GO:0006979; GO:0006644; GO:0005739; GO:0005737; GO:0004602
chr22:31608228-31673624	LIMK2	NM_005569	172.938	167.155	1.0346	0.997694	ko04360; ko04810; ko04666		GO:0046982; GO:0046872; GO:0042325; GO:0016310; GO:0008270; GO:0007283; GO:0005801; GO:0005739; GO:0005737; GO:0005634; GO:0005625; GO:0005524; GO:0004674; GO:0000166
chr19:10828728-10942586	DNM2	NM_001005360	242.304	234.229	1.03447	0.997694	ko04144; ko05100; ko04666		GO:0048489; GO:0045893; GO:0045334; GO:0045211; GO:0045202; GO:0043065; GO:0033572; GO:0032403; GO:0031623; GO:0030054; GO:0019901; GO:0019899; GO:0016787; GO:0016044; GO:0014069; GO:0008017; GO:0007165; GO:0006897; GO:0006892; GO:0006355; GO:0006184; GO:0005886; GO:0005874; GO:0005856; GO:0005829; GO:0005737; GO:0005634; GO:0005525; GO:0005515; GO:0003924; GO:0000166; GO:0000139; GO:0000086
chr1:151254632-151266632	ZNF687	NM_020832	70.1649	67.8396	1.03428	0.997694			GO:0046872; GO:0008270; GO:0006355; GO:0005730; GO:0005634; GO:0005622; GO:0003677
chrX:48367370-48379221	PORCN	NM_203473	0.00230456	0.00222929	1.03376	1	ko04310		GO:0016746; GO:0016055; GO:0016021; GO:0016020; GO:0005789; GO:0005783
chr17:30677127-30697468	ZNF207	NM_001098507	453.872	439.178	1.03346	0.997694		zinc finger protein 207	GO:0046872; GO:0008270; GO:0006355; GO:0005730; GO:0005634; GO:0005622; GO:0003700; GO:0003677
chr7:100728703-100734800	TRIM56	NM_030961	43.0303	41.6409	1.03337	0.997694			GO:0070534; GO:0051607; GO:0046872; GO:0034340; GO:0032608; GO:0016874; GO:0008270; GO:0005737; GO:0005622; GO:0004842
chr3:131100608-131107674	NUDT16	NM_001171905	32.4776	31.4321	1.03326	0.997694			GO:0046872; GO:0016787; GO:0005730; GO:0005654; GO:0005634; GO:0003723
chr8:22422306-22433008	SORBS3	NM_005775	213.447	206.583	1.03323	0.997694			GO:0051496; GO:0051495; GO:0043410; GO:0031589; GO:0030054; GO:0017166; GO:0008134; GO:0007155; GO:0006936; GO:0005925; GO:0005856; GO:0005829; GO:0005737; GO:0005634; GO:0005515; GO:0005200; GO:0000122
chrX:39910498-39956781	BCOR	NM_001123385	33.809	32.7266	1.03307	0.997694			GO:0070171; GO:0065001; GO:0060021; GO:0051572; GO:0045892; GO:0044212; GO:0042826; GO:0042476; GO:0035518; GO:0031519; GO:0031072; GO:0030502; GO:0016568; GO:0008134; GO:0007507; GO:0005634; GO:0005515; GO:0004842; GO:0003714; GO:0000415; GO:0000122
chr16:838621-849113	CHTF18	NM_022092	56.1203	54.368	1.03223	0.997694			GO:0017111; GO:0007049; GO:0006260; GO:0005634; GO:0005524; GO:0003677; GO:0000166
chrX:153287263-153363191	MECP2	NM_001110792	37.1965	36.0378	1.03215	0.997694			GO:0047485; GO:0045892; GO:0019904; GO:0010385; GO:0005634; GO:0005515; GO:0003714; GO:0003677; GO:0000792; GO:0000122
chr12:57482676-57490933	NAB2	NM_005967	152.917	148.174	1.03201	0.997694			GO:0045682; GO:0042552; GO:0016480; GO:0014037; GO:0008283; GO:0008134; GO:0007399; GO:0005634; GO:0003714; GO:0001958
chr19:11071575-11172958	SMARCA4	NM_001128844	10.9877	10.6475	1.03195	0.997694			GO:0071778; GO:0071565; GO:0071564; GO:0070577; GO:0060766; GO:0051091; GO:0050681; GO:0047485; GO:0045944; GO:0045893; GO:0045892; GO:0045749; GO:0043923; GO:0030957; GO:0030308; GO:0016818; GO:0016514; GO:0008094; GO:0007399; GO:0006357; GO:0006355; GO:0006338; GO:0006337; GO:0005634; GO:0005524; GO:0005515; GO:0004386; GO:0003714; GO:0003713; GO:0003677; GO:0003407; GO:0002039; GO:0000790; GO:…
chr1:109472129-109506111	CLCC1	NM_001048210	28.3993	27.5211	1.03191	0.997694			GO:0043231; GO:0016021; GO:0016020; GO:0005794; GO:0005792; GO:0005783; GO:0005737; GO:0005634; GO:0005254
chr6:30851860-30867933	DDR1	NM_013993	0.00510441	0.00494774	1.03166	1			GO:0060749; GO:0060444; GO:0043588; GO:0043583; GO:0031100; GO:0018108; GO:0016772; GO:0016323; GO:0008285; GO:0007566; GO:0007169; GO:0007155; GO:0005887; GO:0005886; GO:0005576; GO:0005524; GO:0005515; GO:0004872; GO:0004714; GO:0004672; GO:0001952; GO:0001558; GO:0000166
chr20:45186461-45318276	SLC13A3	NM_001011554	0.000279179	0.000270627	1.0316	1			GO:0071436; GO:0055085; GO:0016021; GO:0015362; GO:0015293; GO:0015183; GO:0015141; GO:0015137; GO:0006820; GO:0006814; GO:0005886; GO:0005624; GO:0005215
chr21:30396937-30426809	USP16	NM_001032410	67.0028	64.9985	1.03084	0.997694			GO:0051301; GO:0051289; GO:0046872; GO:0045893; GO:0043130; GO:0042393; GO:0016578; GO:0016568; GO:0008270; GO:0008233; GO:0007067; GO:0007049; GO:0006511; GO:0006508; GO:0005737; GO:0005634; GO:0004843; GO:0004221; GO:0004197; GO:0003713
chr15:34651088-34659395	LPCAT4	NM_153613	99.3906	96.4351	1.03065	0.997694	ko00564; ko00565		GO:0016746; GO:0016021; GO:0016020; GO:0008654; GO:0008152; GO:0005789; GO:0005783; GO:0005509
chr15:65255362-65281812	SPG21	NM_016630	156.874	152.215	1.03061	0.997694			GO:0050851; GO:0042609; GO:0030140; GO:0016020; GO:0010008; GO:0008219; GO:0005829; GO:0005794; GO:0005768; GO:0005737; GO:0005634
chr1:53704027-53793821	LRP8	NM_004631	45.314	43.9806	1.03032	0.997694			GO:0045860; GO:0034187; GO:0030229; GO:0030168; GO:0021819; GO:0021766; GO:0019221; GO:0016021; GO:0007596; GO:0007165; GO:0006897; GO:0006629; GO:0006508; GO:0005901; GO:0005886; GO:0005615; GO:0005576; GO:0005515; GO:0005509; GO:0004888; GO:0004872
chrX:133903595-133931262	FAM122C	NM_001170780	139.301	135.224	1.03015	0.997694
chr9:125883898-125967377	STRBP	NM_018387	0.000547476	0.000531688	1.02969	1			GO:0030154; GO:0015630; GO:0007638; GO:0007286; GO:0007283; GO:0007275; GO:0006928; GO:0005737; GO:0005634; GO:0005622; GO:0003727; GO:0003725; GO:0003677
chr16:30773629-30787409	RNF40	NM_014771	151.463	147.189	1.02904	0.997694			GO:0046872; GO:0042803; GO:0033523; GO:0032403; GO:0031625; GO:0019717; GO:0017075; GO:0016874; GO:0016568; GO:0010390; GO:0008270; GO:0006511; GO:0005886; GO:0005737; GO:0005730; GO:0005634; GO:0005515; GO:0004842; GO:0000151
chr10:97515408-97637023	ENTPD1	NM_001776	0.00683641	0.00664543	1.02874	1	ko00230; ko00240		GO:0030168; GO:0017111; GO:0017110; GO:0016787; GO:0009181; GO:0007596; GO:0007186; GO:0007155; GO:0006200; GO:0005887; GO:0005886; GO:0005605; GO:0005524; GO:0000166
chr1:29563027-29653325	PTPRU	NM_005704	7.13231	6.93479	1.02848	0.997694			GO:0060070; GO:0035335; GO:0034394; GO:0034109; GO:0030336; GO:0030154; GO:0016787; GO:0016337; GO:0008285; GO:0008013; GO:0007185; GO:0007155; GO:0006470; GO:0005911; GO:0005887; GO:0005886; GO:0005515; GO:0005001; GO:0004872; GO:0004725
chr12:53900473-53901422	NPFF	NM_003717	20.0908	19.5355	1.02843	0.997694	ko04080		GO:0007268; GO:0007218; GO:0005625; GO:0005576; GO:0005184; GO:0005102
chr2:170680996-170681442	METTL5	NM_014168	306.746	298.268	1.02842	0.997694			GO:0016740; GO:0008168; GO:0003676
chr15:59499041-59500714	LDHAL6B	NM_033195	0.302261	0.293907	1.02842	1	ko00010; ko00640; ko00620; ko00270	lactate dehydrogenase A-like 6B	GO:0044262; GO:0016491; GO:0006096; GO:0005737; GO:0005515; GO:0004459; GO:0000166
chr7:31792631-32338383	PDE1C	NM_001191059	0.0197774	0.0192308	1.02842	1	ko00230; ko04020		GO:0048011; GO:0046872; GO:0016787; GO:0008081; GO:0007202; GO:0007165; GO:0005829; GO:0005516; GO:0004117
chr17:3626917-3630011	GSG2	NM_031965	46.8826	45.5869	1.02842	0.997694			GO:0090231; GO:0072355; GO:0072354; GO:0071459; GO:0043231; GO:0031965; GO:0016568; GO:0007243; GO:0007064; GO:0007049; GO:0006468; GO:0005856; GO:0005819; GO:0005813; GO:0005737; GO:0005694; GO:0005634; GO:0005524; GO:0004674; GO:0004672; GO:0000166
chr4:123843492-123843849	NUDT6	NM_007083	45.8733	44.6055	1.02842	0.997694			GO:0016787; GO:0008150; GO:0008083; GO:0005739; GO:0005737; GO:0005634; GO:0005575
chr11:126173646-126216810	DCPS	NM_014026	66.2375	64.4069	1.02842	0.997694	ko03018		GO:0043928; GO:0016787; GO:0016071; GO:0016070; GO:0005829; GO:0005739; GO:0005737; GO:0005730; GO:0005634; GO:0005515; GO:0000290; GO:0000288; GO:0000184
chr10:32735040-33171792	C10orf68	NM_024688	0.975046	0.948099	1.02842	1
chr11:1618406-1619524	KRTAP5-2	NM_001004325	0.485515	0.472097	1.02842	1			GO:0045095
chrX:37865834-37988073	SYTL5	NM_001163335	0.284878	0.277005	1.02842	1			GO:0046872; GO:0017137; GO:0016020; GO:0006886; GO:0005515
chr1:33327868-33338082	FNDC5	NM_153756	0.362458	0.352441	1.02842	1			GO:0016021; GO:0016020; GO:0005778; GO:0005777
chr14:92789536-92967825	SLC24A4	NM_153647	0.0462226	0.0449452	1.02842	1			GO:0055085; GO:0016021; GO:0015297; GO:0015293; GO:0006816; GO:0006814; GO:0006813; GO:0006811; GO:0005886
chr11:125542228-125550942	ACRV1	NM_020107	0.494152	0.480496	1.02842	1			GO:0031410; GO:0007275; GO:0001669
chr4:139978870-140005647	ELF2	NM_201999	36.8301	35.8123	1.02842	0.997694			GO:0045893; GO:0045892; GO:0043565; GO:0006357; GO:0005737; GO:0005730; GO:0005634; GO:0005515; GO:0003700
chr3:186933872-187009810	MASP1	NM_001879	0.147134	0.143068	1.02842	1	ko05150; ko04610		GO:0048306; GO:0045916; GO:0045087; GO:0042803; GO:0008233; GO:0006956; GO:0006508; GO:0005615; GO:0005576; GO:0005515; GO:0005509; GO:0004252; GO:0003824; GO:0001867
chr17:73817324-73818071	LOC100507191	XM_003118746	1.63275	1.58763	1.02842	1
chr11:31806339-31832879	PAX6	NM_001604	1.07041	1.04083	1.02842	1	ko04950		GO:0070412; GO:0061303; GO:0061072; GO:0050768; GO:0048663; GO:0045944; GO:0045893; GO:0043565; GO:0042593; GO:0035035; GO:0030154; GO:0019901; GO:0016567; GO:0010628; GO:0009887; GO:0009611; GO:0008134; GO:0007601; GO:0007417; GO:0007275; GO:0006366; GO:0006357; GO:0006355; GO:0005737; GO:0005730; GO:0005634; GO:0005515; GO:0004842; GO:0003700; GO:0003677; GO:0003322; GO:0001654; GO:0001568; GO:…
chr18:34823002-35146000	BRUNOL4	NM_020180	0.236193	0.229666	1.02842	1			GO:0048026; GO:0042835; GO:0009790; GO:0008380; GO:0007281; GO:0006397; GO:0005737; GO:0005730; GO:0005634; GO:0000900; GO:0000381; GO:0000166
chr1:155402970-155404053	POU5F1P4	NR_034180	1.00963	0.98173	1.02842	1
chr9:6506032-6506954	UHRF2	NM_152896	28.4183	27.633	1.02842	0.997694			GO:0051865; GO:0051726; GO:0046872; GO:0042393; GO:0030154; GO:0016874; GO:0016567; GO:0008283; GO:0008270; GO:0006511; GO:0005730; GO:0005634; GO:0005515; GO:0004842; GO:0003677
chr7:102993176-103086624	SLC26A5	NM_198999	0.201892	0.196313	1.02842	1			GO:0055085; GO:0042391; GO:0030507; GO:0016328; GO:0016323; GO:0016021; GO:0016020; GO:0008360; GO:0008272; GO:0008271; GO:0007605; GO:0005886; GO:0005215
chr11:58476229-58499447	GLYAT	NM_005838	0.195498	0.190096	1.02842	1			GO:0047961; GO:0016746; GO:0009636; GO:0006805; GO:0006637; GO:0005759; GO:0005739
chr19:21579916-21610297	ZNF493	NM_001076678	1.02721	0.998827	1.02842	1			GO:0046872; GO:0008270; GO:0006355; GO:0005634; GO:0005622; GO:0003677
chrX:133507325-133562822	PHF6	NM_001015877	9.48152	9.21975	1.02839	0.997694			GO:0046872; GO:0008270; GO:0006355; GO:0005730; GO:0005634
chrX:153686622-153702517	PLXNA3	NM_017514	48.1276	46.8529	1.02721	0.997694	ko04360		GO:0071526; GO:0051495; GO:0050919; GO:0048843; GO:0021860; GO:0021766; GO:0017154; GO:0016021; GO:0016020; GO:0007411; GO:0007275; GO:0007165; GO:0005886; GO:0005622; GO:0004888; GO:0004872; GO:0002116
chr22:29723668-29784572	AP1B1	NM_001127	0.0121744	0.0118533	1.02709	1	ko04142		GO:0050690; GO:0031410; GO:0030665; GO:0030659; GO:0030131; GO:0030117; GO:0016044; GO:0016032; GO:0016020; GO:0008565; GO:0006897; GO:0006892; GO:0006886; GO:0005829; GO:0005794; GO:0005765; GO:0005515; GO:0005215; GO:0000139
chr1:157963062-158069919	KIRREL	NM_018240	37.0552	36.0889	1.02678	0.997694			GO:0043198; GO:0031253; GO:0016021; GO:0016020; GO:0007588; GO:0005911; GO:0005886
chr1:21922707-21995856	RAP1GAP	NM_001145657	0.00128542	0.00125211	1.0266	1			GO:0051056; GO:0043547; GO:0042803; GO:0032318; GO:0017016; GO:0016020; GO:0007165; GO:0006184; GO:0005829; GO:0005794; GO:0005624; GO:0005622; GO:0005515; GO:0005096; GO:0003924; GO:0000139
chr17:40265128-40273382	KAT2A	NM_021078	107.188	104.488	1.02584	0.997694	ko04330	K(lysine) acetyltransferase 2A	GO:0044419; GO:0044154; GO:0043997; GO:0043966; GO:0042981; GO:0042826; GO:0035264; GO:0033276; GO:0030914; GO:0030901; GO:0022037; GO:0021537; GO:0016740; GO:0016578; GO:0010484; GO:0008283; GO:0008152; GO:0007399; GO:0006366; GO:0006357; GO:0006338; GO:0005671; GO:0005634; GO:0005515; GO:0004402; GO:0003713; GO:0003682; GO:0001843; GO:0001756; GO:0001701
chr17:40703983-40707232	HSD17B1	NM_000413	52.8209	51.5073	1.0255	0.997694	ko00140		GO:0016491; GO:0008210; GO:0008202; GO:0006703; GO:0006694; GO:0005829; GO:0005737; GO:0004303; GO:0003824; GO:0000166
chrX:23851464-23926057	APOO	NM_024122	45.3282	44.2274	1.02489	0.997694			GO:0034364; GO:0034362; GO:0034361; GO:0016021; GO:0016020; GO:0006869; GO:0006810; GO:0005576
chr16:57792076-57836439	KIFC3	NM_001130100	0.00187767	0.00183294	1.0244	1			GO:0090136; GO:0045218; GO:0031410; GO:0030659; GO:0030054; GO:0016020; GO:0007601; GO:0007030; GO:0007018; GO:0005915; GO:0005912; GO:0005874; GO:0005871; GO:0005856; GO:0005813; GO:0005794; GO:0005737; GO:0005524; GO:0003777; GO:0000166
chr7:1609708-1629262	KIAA1908	NR_021487	0.000218411	0.000213281	1.02405	1
chr8:142222087-142238673	SLC45A4	NM_001080431	41.3497	40.3825	1.02395	0.997694		solute carrier family 45, member 4	GO:0016021; GO:0016020; GO:0006810
chr3:48730880-48754711	IP6K2	NM_016291	191.692	187.309	1.0234	0.997694			GO:0060337; GO:0052724; GO:0052723; GO:0046854; GO:0045111; GO:0043231; GO:0043065; GO:0030308; GO:0019221; GO:0016740; GO:0016301; GO:0008440; GO:0005654; GO:0005634; GO:0005524; GO:0000832; GO:0000166
chr8:22022652-22069839	BMP1	NM_006129	0.00138343	0.00135201	1.02324	1			GO:0061036; GO:0046872; GO:0042157; GO:0030154; GO:0008270; GO:0008237; GO:0008233; GO:0008083; GO:0007275; GO:0006629; GO:0006508; GO:0005615; GO:0005576; GO:0005509; GO:0005125; GO:0004222; GO:0001503; GO:0001502; GO:0001501
chr12:117152603-117175880	C12orf49	NM_024738	67.6284	66.1195	1.02282	0.997694		chromosome 12 open reading frame 49	GO:0005576
chrX:117480035-117583924	WDR44	NM_019045	18.161	17.7646	1.02231	0.997694			GO:0048471; GO:0030334; GO:0017137; GO:0016020; GO:0010008; GO:0005874; GO:0005829; GO:0005794; GO:0005768; GO:0005737
chr2:241418828-241497405	ANKMY1	NM_016552	21.4256	20.9878	1.02086	0.997694			GO:0046872; GO:0008270
chr22:19775933-19842462	GNB1L	NM_053004	38.5321	37.76	1.02045	0.997694		guanine nucleotide binding protein (G protein), beta polypeptide 1-like	GO:0035556; GO:0035176; GO:0009898; GO:0007186; GO:0005737; GO:0005622; GO:0003674
chr1:150898814-150917796	SETDB1	NM_001145415	80.9647	79.3725	1.02006	0.997694	ko00310		GO:0018024; GO:0016740; GO:0016568; GO:0008270; GO:0008168; GO:0006355; GO:0005886; GO:0005794; GO:0005737; GO:0005730; GO:0005694; GO:0005634; GO:0005515; GO:0003677
chr15:50569388-50647605	GABPB1	NM_005254	35.1115	34.442	1.01944	0.997694			GO:0046982; GO:0045944; GO:0044212; GO:0006357; GO:0005634; GO:0005515; GO:0003700
chr6:43399488-43419014	ABCC10	NM_033450	33.4707	32.8471	1.01898	0.997694	ko02010		GO:0055085; GO:0042626; GO:0016887; GO:0016021; GO:0005886; GO:0005524; GO:0000166
chr15:74287013-74340160	PML	NM_033238	35.0252	34.3863	1.01858	0.997694	ko05200; ko04120; ko04144; ko05221		GO:2000059; GO:0060444; GO:0060333; GO:0051974; GO:0051457; GO:0050897; GO:0050821; GO:0048384; GO:0046982; GO:0046872; GO:0046332; GO:0045930; GO:0045892; GO:0045343; GO:0045165; GO:0044419; GO:0042803; GO:0042771; GO:0042406; GO:0034097; GO:0032938; GO:0032469; GO:0032211; GO:0032183; GO:0031965; GO:0031901; GO:0031625; GO:0031065; GO:0030578; GO:0030308; GO:0030099; GO:0019221; GO:0016605; GO:…
chr11:14526421-14541991	PSMA1	NM_148976	451.424	443.915	1.01692	0.997694	ko03050		GO:0051603; GO:0051439; GO:0051437; GO:0051436; GO:0042981; GO:0034641; GO:0031145; GO:0019773; GO:0016071; GO:0016070; GO:0016032; GO:0008233; GO:0006977; GO:0006915; GO:0006521; GO:0006511; GO:0005844; GO:0005829; GO:0005813; GO:0005737; GO:0005730; GO:0005654; GO:0005634; GO:0005515; GO:0004298; GO:0003723; GO:0002474; GO:0000502; GO:0000278; GO:0000216; GO:0000209; GO:0000084; GO:0000082; GO:…
chrX:70278922-70288280	SNX12	NM_013346	122.754	120.831	1.01591	0.997694			GO:0035091; GO:0016020; GO:0015031; GO:0008289; GO:0007154; GO:0005515
chr8:113235156-114449242	CSMD3	NM_198124	5.91364e-05	5.82308e-05	1.01555	1			GO:0016021; GO:0005886
chr10:89101952-89103371	LOC439994	NR_029408	53.3448	52.5811	1.01452	0.997694
chr17:2207247-2228721	SRR	NM_021947	115.013	113.405	1.01418	0.997694	ko00260	serine racemase	GO:0070179; GO:0070178; GO:0051289; GO:0045177; GO:0043278; GO:0043025; GO:0042866; GO:0042803; GO:0042493; GO:0032496; GO:0030378; GO:0030170; GO:0030165; GO:0018114; GO:0016853; GO:0016829; GO:0016594; GO:0014070; GO:0009069; GO:0008721; GO:0007568; GO:0007420; GO:0006563; GO:0005886; GO:0005737; GO:0005625; GO:0005524; GO:0005509; GO:0003941; GO:0000287; GO:0000166
chr13:60239716-60587343	DIAPH3	NM_001042517	24.9901	24.6434	1.01407	0.997694	ko04810		GO:0030036; GO:0017048; GO:0016043; GO:0005488; GO:0003779
chr1:32042085-32053287	TINAGL1	NM_022164	153.25	151.221	1.01342	0.997694			GO:0043236; GO:0031012; GO:0030247; GO:0016197; GO:0006955; GO:0006508; GO:0005737; GO:0005576; GO:0005201; GO:0005044; GO:0004197
chr3:180630233-180700541	FXR1	NM_001013439	76.4441	75.4349	1.01338	0.997694			GO:0043034; GO:0030154; GO:0017148; GO:0007517; GO:0007275; GO:0006915; GO:0005844; GO:0005737; GO:0005730; GO:0005634; GO:0003730; GO:0003723; GO:0002151
chr8:1904910-1906766	ARHGEF10	NM_014629	69.6209	68.7423	1.01278	0.997694			GO:0090307; GO:0051496; GO:0051298; GO:0035023; GO:0033126; GO:0022011; GO:0019894; GO:0005829; GO:0005813; GO:0005625; GO:0005622; GO:0005089; GO:0005085
chr2:238600806-238690290	LRRFIP1	NM_001137550	31.7339	31.3427	1.01248	0.997694			GO:0045892; GO:0006357; GO:0005856; GO:0005737; GO:0005634; GO:0005515; GO:0003725; GO:0003677
chr4:184236738-184238687	WWC2	NM_024949	16.033	15.8374	1.01235	0.997694		WW and C2 domain containing 2
chr19:10362639-10370736	MRPL4	NM_146387	323.855	319.927	1.01228	0.997694			GO:0006412; GO:0005840; GO:0005739; GO:0003735
chr2:172290743-172341562	DCAF17	NM_025000	15.5774	15.3899	1.01218	0.997694			GO:0080008; GO:0016567; GO:0016021; GO:0016020; GO:0005730; GO:0005634
chr20:44044706-44054884	PIGT	NM_015937	184.406	182.226	1.01196	0.997694	ko00563		GO:0051402; GO:0044267; GO:0043687; GO:0042765; GO:0030182; GO:0030176; GO:0016255; GO:0016023; GO:0016021; GO:0016020; GO:0006501; GO:0005789; GO:0005783; GO:0005737; GO:0005515; GO:0003923
chr3:11314009-11600302	ATG7	NM_006395	29.0079	28.67	1.01179	0.997694	ko04140		GO:0055013; GO:0050877; GO:0043066; GO:0042803; GO:0042594; GO:0032446; GO:0031401; GO:0031396; GO:0031175; GO:0030163; GO:0021987; GO:0021955; GO:0021860; GO:0021680; GO:0019778; GO:0015031; GO:0009791; GO:0007628; GO:0006996; GO:0006944; GO:0006914; GO:0006520; GO:0006497; GO:0006464; GO:0005737; GO:0005515; GO:0004839; GO:0003824; GO:0001889; GO:0000166
chr22:50702141-50708779	MAPK11	NM_002751	26.3237	26.0173	1.01178	0.997694	ko05140; ko04664; ko04620; ko04010; ko05131; ko04670; ko05142; ko04722; ko04660; ko05145; ko04912; ko05160; ko05014; ko04914; ko04011; ko04622; ko04621; ko04370; ko05120		GO:0051403; GO:0051149; GO:0051090; GO:0048011; GO:0045087; GO:0042692; GO:0034142; GO:0034138; GO:0034134; GO:0034130; GO:0016071; GO:0016070; GO:0008063; GO:0007265; GO:0007243; GO:0007165; GO:0006950; GO:0005829; GO:0005654; GO:0005524; GO:0005515; GO:0004707; GO:0004674; GO:0002756; GO:0002755; GO:0002224; GO:0000187; GO:0000166
chr16:67927174-67966547	CTRL	NM_001907	9.55426	9.44546	1.01152	0.997694	ko04974; ko04972		GO:0008233; GO:0007586; GO:0006508; GO:0005615; GO:0004252
chr13:107195604-107220514	ARGLU1	NM_018011	115.738	114.421	1.01151	0.997694		arginine and glutamate rich 1	GO:0006355; GO:0005634
chr16:810746-818929	MSLN	NM_005823	69.6885	68.908	1.01133	0.997694			GO:0031225; GO:0016020; GO:0007155; GO:0005886; GO:0005794; GO:0005576
chr11:18415935-18429765	LDHA	NM_001165414	906.62	896.68	1.01109	0.997694	ko00010; ko00640; ko00620; ko00270		GO:0044262; GO:0016491; GO:0006096; GO:0006090; GO:0005829; GO:0005737; GO:0004459; GO:0000166
chr15:44085087-44092255	SERINC4	NM_001033517	608.334	601.798	1.01086	0.997694			GO:0016021; GO:0016020; GO:0008654; GO:0006629
chr19:18699467-18703210	C19orf60	NM_001100418	160.86	159.159	1.01069	0.997694			GO:0005515
chr12:57916559-57924561	MBD6	NM_052897	63.6772	63.1188	1.00885	0.997694			GO:0005730; GO:0005694; GO:0005634; GO:0003682; GO:0003677
chr1:206643585-206670223	IKBKE	NM_014002	15.0615	14.9297	1.00883	0.997694	ko04623; ko05160; ko04620; ko04622		GO:0045087; GO:0043123; GO:0034142; GO:0034138; GO:0032480; GO:0016772; GO:0016605; GO:0010008; GO:0008630; GO:0008384; GO:0008063; GO:0006974; GO:0006955; GO:0006468; GO:0005886; GO:0005829; GO:0005737; GO:0005634; GO:0005524; GO:0005515; GO:0004704; GO:0004672; GO:0002756; GO:0000166
chr7:89840999-89866992	STEAP2	NM_001040666	6.81334	6.75375	1.00882	0.997694			GO:0055072; GO:0050660; GO:0046872; GO:0045055; GO:0042598; GO:0030173; GO:0030140; GO:0022900; GO:0016491; GO:0016021; GO:0010008; GO:0009725; GO:0009055; GO:0006897; GO:0006893; GO:0006811; GO:0005886; GO:0005829; GO:0005769; GO:0005506; GO:0005215; GO:0000166
chr9:132396882-132401444	ASB6	NM_017873	85.6559	84.9179	1.00869	0.997694			GO:0035556; GO:0005737
chr19:58768949-58790171	LOC100506561	XR_109505	9.95149	9.87395	1.00785	0.997898
chr20:50700549-50808731	ZFP64	NM_199427	22.4471	22.2844	1.0073	0.997898			GO:0046872; GO:0008270; GO:0006355; GO:0005634; GO:0005622; GO:0003677; GO:0003676
chr20:35380193-35402230	DSN1	NM_001145316	33.3381	33.0968	1.00729	0.997898			GO:0051301; GO:0007059; GO:0005829; GO:0005737; GO:0005694; GO:0005634; GO:0005515; GO:0000444; GO:0000278; GO:0000236; GO:0000087
chr1:180123967-180169860	QSOX1	NM_002826	174.462	173.256	1.00696	0.997694			GO:0045454; GO:0030173; GO:0016971; GO:0016491; GO:0016021; GO:0016020; GO:0006467; GO:0005794; GO:0005615; GO:0005576; GO:0000139
chr19:59024896-59032113	ZBTB45	NM_032792	50.571	50.2253	1.00688	0.997694			GO:0046872; GO:0008270; GO:0006355; GO:0005634; GO:0005622; GO:0003677
chr13:50618578-50699677	DLEU2	NR_002612	33.09	32.8906	1.00606	0.998285
chr1:93544781-93604638	MTF2	NM_001164391	21.7395	21.6133	1.00584	0.997898			GO:0046872; GO:0008270; GO:0005737; GO:0005634; GO:0003677
chr17:43513265-43568146	PLEKHM1	NM_014798	39.8304	39.6011	1.00579	0.997898			GO:0046872; GO:0035556; GO:0005737
chr20:13765671-13799067	C20orf7	NR_029377	26.376	26.2344	1.0054	0.998237			GO:0032981; GO:0031314; GO:0016740; GO:0016020; GO:0008168; GO:0008152; GO:0005739; GO:0003674
chr16:27787949-27791692	KIAA0556	NM_015202	43.1309	42.9008	1.00536	0.997898			GO:0005886; GO:0005730; GO:0005634
chr6:160101892-160114362	SOD2	NM_000636	170.372	169.509	1.00509	0.997898	ko05016; ko04146		GO:0071361; GO:0055093; GO:0055072; GO:0051881; GO:0051602; GO:0051289; GO:0050790; GO:0050665; GO:0048773; GO:0048678; GO:0048666; GO:0048147; GO:0046872; GO:0046686; GO:0045599; GO:0045429; GO:0043524; GO:0043066; GO:0042802; GO:0042645; GO:0042554; GO:0042542; GO:0042493; GO:0034021; GO:0033591; GO:0032496; GO:0032364; GO:0031667; GO:0030145; GO:0030097; GO:0022904; GO:0019825; GO:0019430; GO:…
chr14:24407939-24423392	C14orf167	NR_023923	34.6568	34.4862	1.00495	0.998253
chr14:23527772-23564945	ACIN1	NM_014977	106.291	105.776	1.00487	0.997898	ko03040; ko03013		GO:0045657; GO:0030263; GO:0030218; GO:0019899; GO:0016887; GO:0006921; GO:0006915; GO:0006200; GO:0005829; GO:0005737; GO:0005730; GO:0005634; GO:0005515; GO:0003676; GO:0000166
chr16:57662418-57698944	GPR56	NM_001145774	91.782	91.362	1.0046	0.997898			GO:0016021; GO:0007420; GO:0007267; GO:0007218; GO:0007186; GO:0007155; GO:0005887; GO:0005886; GO:0004930; GO:0004872; GO:0004871
chr3:49507564-49573048	DAG1	NM_001165928	189.106	188.266	1.00446	0.997898	ko05414; ko05416; ko05412; ko05410; ko04512		GO:0070938; GO:0051898; GO:0051393; GO:0044419; GO:0043409; GO:0043237; GO:0042169; GO:0034453; GO:0030336; GO:0030175; GO:0030027; GO:0019048; GO:0017166; GO:0016021; GO:0016010; GO:0015631; GO:0008307; GO:0007016; GO:0006607; GO:0006509; GO:0005925; GO:0005886; GO:0005856; GO:0005737; GO:0005654; GO:0005634; GO:0005615; GO:0005604; GO:0005576; GO:0005515; GO:0005509; GO:0004872; GO:0003779; GO:…
chr15:30375157-30385702	LOC653073	XM_001724382	1.61219	1.60531	1.00429	1
chr10:103338598-103348161	POLL	NM_001174084	98.0878	97.7242	1.00372	0.998285	ko03410; ko03450		GO:0046872; GO:0016829; GO:0016779; GO:0016740; GO:0016446; GO:0008152; GO:0006289; GO:0006281; GO:0006260; GO:0005634; GO:0005622; GO:0003887; GO:0003824; GO:0003677
chr6:116359893-116361107	LOC728402	NR_027338	883.698	881.067	1.00299	0.998285
chr14:61447831-61550451	SLC38A6	NM_001172702	9.33205	9.30683	1.00271	0.998939			GO:0016021; GO:0016020; GO:0006865; GO:0006814; GO:0006811
chrX:123094270-123236506	STAG2	NM_001042749	37.4748	37.3967	1.00209	0.998939	ko04113; ko04111; ko04110	stromal antigen 2	GO:0051301; GO:0032876; GO:0007126; GO:0007091; GO:0007062; GO:0005694; GO:0005654; GO:0005634; GO:0005515; GO:0000785; GO:0000775; GO:0000278; GO:0000236; GO:0000087
chr12:121675493-121734556	CAMKK2	NM_006549	10.2846	10.2632	1.00209	0.999088	ko04920		GO:0046777; GO:0045893; GO:0045859; GO:0019722; GO:0006468; GO:0005737; GO:0005622; GO:0005524; GO:0005516; GO:0005509; GO:0004713; GO:0004683; GO:0000166; GO:0000165
chr7:127949687-127983974	RBM28	NM_018077	35.6334	35.563	1.00198	0.998939			GO:0008380; GO:0006397; GO:0005794; GO:0005730; GO:0005681; GO:0005634; GO:0003723; GO:0000166
chr11:134114584-134117686	VPS26B	NM_052875	59.7525	59.6346	1.00198	0.998939			GO:0030904; GO:0016020; GO:0015031; GO:0007034; GO:0005829; GO:0005737
chr10:89618917-89624317	KILLIN	NM_001126049	22.319	22.2843	1.00156	0.999064			GO:0007049; GO:0006915; GO:0005634; GO:0003677
chr19:56186558-56207140	EPN1	NM_001130071	322.993	322.65	1.00106	0.999076	ko04144		GO:0042059; GO:0008289; GO:0008134; GO:0007173; GO:0006897; GO:0005905; GO:0005886; GO:0005737; GO:0005634
chr20:57556297-57570839	TH1L	NM_198976	310.805	310.483	1.00104	0.999086			GO:0050434; GO:0045892; GO:0016032; GO:0010467; GO:0006368; GO:0006366; GO:0005654; GO:0005634; GO:0005515
chr17:36886509-36904680	CISD3	NM_001136498	81.3202	81.2369	1.00103	0.999395			GO:0051537; GO:0046872; GO:0005739
chr7:104650988-104654588	LOC100216545	NR_024586	4.57869	4.57936	0.999854	0.999864
chr13:33006929-33112936	N4BP2L2	NM_033111	45.5611	45.5777	0.999636	0.999566		NEDD4 binding protein 2-like 2	GO:0008150; GO:0005575; GO:0003674
chr12:97301000-97347469	NEDD1	NM_152905	26.2226	26.2334	0.999588	0.999566			GO:0051301; GO:0007067; GO:0005856; GO:0005829; GO:0005813; GO:0005737; GO:0000278; GO:0000086
chr22:43527475-43539403	MCAT	NM_173467	81.286	81.3235	0.999539	0.999562	ko00061	malonyl CoA:ACP acyltransferase (mitochondrial)	GO:0016740; GO:0008152; GO:0006633; GO:0005739; GO:0005488; GO:0004314
chr2:233421029-233421332	EIF4E2	NM_004846	872.439	873.284	0.999032	0.999562	ko04910; ko04150; ko03013		GO:0031625; GO:0008135; GO:0006417; GO:0006412; GO:0005845; GO:0005737; GO:0005515; GO:0003743; GO:0000339
chr5:92953430-93447404	FAM172A	NM_032042	13.4852	13.5039	0.998615	0.999328			GO:0005783; GO:0005576
chr9:100263461-100365206	TMOD1	NM_003275	5.84987	5.86108	0.998087	0.999241			GO:0030863; GO:0030239; GO:0030049; GO:0030016; GO:0016020; GO:0008180; GO:0005856; GO:0005829; GO:0005737; GO:0005634; GO:0005523; GO:0003779
chr11:123986110-123995543	VWA5A	NM_001130142	16.3177	16.355	0.997719	0.998939			GO:0005730; GO:0005634
chr1:154127779-154164609	TPM3	NM_152263	405.461	406.572	0.997267	0.998285	ko05414; ko05200; ko05216; ko04260; ko05410		GO:0030049; GO:0015629; GO:0006937; GO:0006936; GO:0006928; GO:0005862; GO:0005856; GO:0005829; GO:0005737; GO:0003779; GO:0003674; GO:0001725
chr15:64388176-64436433	SNX1	NM_003099	62.8527	63.0291	0.997201	0.998316			GO:0035091; GO:0034498; GO:0031901; GO:0016020; GO:0010008; GO:0008565; GO:0008289; GO:0007154; GO:0006897; GO:0006886; GO:0005794; GO:0005768; GO:0005737; GO:0005622; GO:0005515
chr10:13483087-13544976	BEND7	NM_152751	16.5459	16.6076	0.996285	0.998601		BEN domain containing 7	GO:0005515
chr19:50706884-50813801	MYH14	NM_001145809	89.4162	89.7894	0.995844	0.997898	ko05416; ko04530		GO:0051015; GO:0030898; GO:0030426; GO:0030424; GO:0030048; GO:0016459; GO:0008360; GO:0008152; GO:0007411; GO:0006200; GO:0005737; GO:0005524; GO:0005516; GO:0001725; GO:0000166; GO:0000146
chr11:126081618-126138877	SRPR	NM_003139	220.632	221.595	0.995654	0.997898	ko03060		GO:0016021; GO:0016020; GO:0006886; GO:0006810; GO:0006614; GO:0006613; GO:0005789; GO:0005785; GO:0005783; GO:0005525; GO:0005047; GO:0004872; GO:0003924; GO:0000166
chr22:51205919-51222087	RABL2B	NM_001130921	0.0578199	0.0580967	0.995236	1			GO:0007264; GO:0006184; GO:0005525; GO:0003924; GO:0000166
chr9:35658289-35665278	C9orf100	NM_032818	25.376	25.5005	0.995118	0.998237			GO:0035023; GO:0005622; GO:0005089; GO:0005085
chr11:134118172-134123270	THYN1	NM_199298	119.591	120.265	0.994396	0.997898			GO:0005730; GO:0005634
chr14:24678264-24685343	CHMP4A	NM_014169	85.2254	85.7162	0.994274	0.997898	ko04144		GO:0031902; GO:0031410; GO:0030659; GO:0016197; GO:0016044; GO:0016020; GO:0015031; GO:0008289; GO:0005829; GO:0005768
chr10:74894046-74927964	ECD	NM_001135752	84.3138	84.8503	0.993677	0.997694			GO:0006366; GO:0006355; GO:0006110; GO:0005737; GO:0005634; GO:0003713
chr6:73983861-74002315	C6orf147	NR_027005	219.881	221.301	0.993583	0.997694
chr17:36886509-36904680	PCGF2	NM_007144	108.579	109.426	0.99226	0.997694			GO:0048704; GO:0046872; GO:0043066; GO:0035102; GO:0031519; GO:0016604; GO:0016573; GO:0009952; GO:0008270; GO:0006355; GO:0005634; GO:0005515; GO:0004842; GO:0003700; GO:0003682; GO:0003677; GO:0001739; GO:0001701; GO:0000790; GO:0000122
chr8:104310660-104345094	FZD6	NM_001164616	79.9912	80.6613	0.991692	0.997694	ko05217; ko05200; ko04310; ko04916		GO:0090090; GO:0045177; GO:0043433; GO:0042813; GO:0042472; GO:0035567; GO:0033278; GO:0032589; GO:0030165; GO:0017147; GO:0016327; GO:0008406; GO:0007409; GO:0007275; GO:0007199; GO:0005887; GO:0005886; GO:0005737; GO:0005515; GO:0004930; GO:0004872; GO:0004871; GO:0001843; GO:0001736; GO:0001525
chr7:127013112-127032767	ZNF800	NM_176814	25.6804	25.9013	0.991471	0.997694			GO:0046872; GO:0008270; GO:0006355; GO:0005634; GO:0005622; GO:0003677
chr10:72972297-73062616	UNC5B	NM_170744	71.5798	72.1962	0.991462	0.997694	ko04360		GO:0042981; GO:0016021; GO:0007411; GO:0007275; GO:0007165; GO:0006915; GO:0005886; GO:0005515; GO:0005042; GO:0004872
chr10:121652222-121664056	SEC23IP	NM_007190	325.772	328.643	0.991264	0.997694			GO:0046872; GO:0043231; GO:0031410; GO:0016020; GO:0012507; GO:0007030; GO:0006886; GO:0005793; GO:0005783; GO:0005737
chr14:55308722-55369552	GCH1	NM_001024024	35.4422	35.7551	0.991249	0.997694	ko00790		GO:0051291; GO:0051260; GO:0051066; GO:0051000; GO:0050884; GO:0050662; GO:0048265; GO:0046654; GO:0045776; GO:0043234; GO:0042803; GO:0042559; GO:0042416; GO:0042311; GO:0034612; GO:0034341; GO:0032496; GO:0031965; GO:0031410; GO:0030742; GO:0016787; GO:0014916; GO:0008270; GO:0008217; GO:0006917; GO:0006809; GO:0006729; GO:0006461; GO:0006184; GO:0005829; GO:0005737; GO:0005730; GO:0005634; GO:…
chr15:68570085-68584246	FEM1B	NM_015322	58.3287	58.8651	0.990888	0.997694			GO:2000001; GO:0060743; GO:0060442; GO:0051438; GO:0042981; GO:0016567; GO:0006917; GO:0005737; GO:0005730; GO:0005634; GO:0005515; GO:0005123; GO:0004842
chr4:15471488-15603180	CC2D2A	NM_001080522	14.8732	15.0148	0.990569	0.997694			GO:0060271; GO:0030030; GO:0005932; GO:0005929; GO:0005856; GO:0005737
chr15:43662379-43699247	TUBGCP4	NM_014444	31.4398	31.7398	0.990548	0.997694			GO:0015630; GO:0008274; GO:0007020; GO:0006461; GO:0005874; GO:0005829; GO:0005813; GO:0005737; GO:0005200; GO:0000922; GO:0000278; GO:0000086
chr19:5205517-5340859	PTPRS	NM_002850	98.6959	99.6472	0.990453	0.997694		protein tyrosine phosphatase, receptor type, S	GO:0022038; GO:0021987; GO:0021766; GO:0021549; GO:0021510; GO:0016787; GO:0016020; GO:0007155; GO:0005887; GO:0005515; GO:0005001; GO:0004872
chr1:24829386-24863571	RCAN3	NM_013441	26.0904	26.3514	0.990095	0.997694			GO:0031013; GO:0019722; GO:0009653; GO:0003723; GO:0000166
chr16:70147528-70196430	PDPR	NM_017990	78.6917	79.4802	0.990079	0.997694			GO:0016491; GO:0010510; GO:0006546; GO:0006090; GO:0005759; GO:0005739; GO:0005737; GO:0004047
chr9:6720862-7175648	KDM4C	NM_015061	22.2861	22.5213	0.989557	0.997694			GO:0050681; GO:0046872; GO:0033169; GO:0032454; GO:0019899; GO:0016702; GO:0016568; GO:0016491; GO:0008284; GO:0008270; GO:0006355; GO:0005634; GO:0000790
chr17:7155371-7166512	C17orf81	NM_015362	166.439	168.244	0.989272	0.997694			GO:0006355; GO:0005737; GO:0005634; GO:0005515
chr3:63850221-64008500	PSMD6	NM_014814	232.67	235.234	0.9891	0.997694	ko03050		GO:0051439; GO:0051437; GO:0051436; GO:0042981; GO:0034641; GO:0031145; GO:0016887; GO:0016071; GO:0016070; GO:0016032; GO:0006977; GO:0006915; GO:0006521; GO:0006508; GO:0006200; GO:0005829; GO:0005654; GO:0002474; GO:0000502; GO:0000278; GO:0000216; GO:0000209; GO:0000084; GO:0000082; GO:0000075
chr16:89160253-89222169	ACSF3	NM_001127214	85.2673	86.2097	0.989069	0.997694			GO:0016878; GO:0016874; GO:0006631; GO:0006629; GO:0005739; GO:0005524; GO:0000166
chr17:26662547-26684974	POLDIP2	NM_015584	149.334	151.096	0.988339	0.997694		polymerase (DNA-directed), delta interacting protein 2	GO:0042645; GO:0005739; GO:0005634
chr8:125500734-125551329	TATDN1	NR_027427	105.028	106.294	0.98809	0.997694			GO:0046872; GO:0016888; GO:0016787; GO:0005634; GO:0004518
chr11:129769600-129875381	PRDM10	NM_199438	97.1059	98.3373	0.987478	0.997898			GO:0046872; GO:0008270; GO:0006355; GO:0005634; GO:0005622; GO:0003677
chr13:41885340-41951166	NAA16	NM_024561	20.8056	21.087	0.986655	0.997694			GO:0045893; GO:0043022; GO:0016407; GO:0006474; GO:0005737; GO:0005667; GO:0005634; GO:0005488
chr16:89778263-89786148	LOC100128881	NR_036480	135.539	137.492	0.985796	0.997694
chr22:30279157-30426857	MTMR3	NM_021090	28.9362	29.362	0.985498	0.997694			GO:0046872; GO:0046856; GO:0035335; GO:0016787; GO:0016020; GO:0006470; GO:0005737; GO:0005730; GO:0005634; GO:0005624; GO:0004725; GO:0004722; GO:0004438
chr1:2334424-2344010	PEX10	NM_002617	118.114	119.973	0.984505	0.997694	ko04146		GO:0046872; GO:0016558; GO:0016020; GO:0008270; GO:0008022; GO:0007031; GO:0005779; GO:0005778; GO:0005777; GO:0005515
chr2:201170603-201346986	SPATS2L	NM_001100422	65.4739	66.5449	0.983906	0.997694		spermatogenesis associated, serine-rich 2-like	GO:0005737; GO:0005730; GO:0005634
chr1:174982327-174992561	MRPS14	NM_022100	63.5526	64.6286	0.983351	0.997694			GO:0006412; GO:0005840; GO:0005761; GO:0005739; GO:0005622; GO:0003735
chr6:170102232-170124106	PHF10	NM_133325	46.8761	47.7245	0.982223	0.997694			GO:0071564; GO:0046872; GO:0008270; GO:0007399; GO:0006355; GO:0005634
chr1:245012956-245027884	HNRNPU	NM_031844	59.8122	60.9185	0.98184	0.997694	ko03040		GO:0071013; GO:0070937; GO:0070934; GO:0030530; GO:0030529; GO:0010467; GO:0009986; GO:0008380; GO:0006396; GO:0005737; GO:0005654; GO:0005634; GO:0005524; GO:0005515; GO:0003723; GO:0003677; GO:0003676; GO:0000398; GO:0000166
chr3:52579367-52719866	PBRM1	NM_018313	24.7637	25.2626	0.980251	0.997694			GO:0008285; GO:0007067; GO:0006355; GO:0006338; GO:0005634; GO:0005515; GO:0003682; GO:0003677; GO:0000228
chr14:99947637-100070727	CCNK	NM_001099402	111.609	113.939	0.97955	0.997694		cyclin K	GO:0051301; GO:0019901; GO:0007067; GO:0007049; GO:0006366; GO:0006355; GO:0005515; GO:0000079
chr11:118967212-118972131	DPAGT1	NM_001382	105.601	107.948	0.978258	0.997694	ko00510		GO:0051259; GO:0044267; GO:0043687; GO:0030176; GO:0019408; GO:0018279; GO:0016757; GO:0016021; GO:0016020; GO:0008963; GO:0008152; GO:0006488; GO:0006487; GO:0006047; GO:0005792; GO:0005789; GO:0005783; GO:0005624; GO:0003975
chr10:101419231-101473473	ENTPD7	NM_020354	29.3995	30.0602	0.978021	0.997694			GO:0031410; GO:0030659; GO:0016787; GO:0016021; GO:0016020
chr4:95128758-95212488	SMARCAD1	NM_001128429	39.8854	40.829	0.976889	0.997694			GO:0051260; GO:0045893; GO:0016787; GO:0016568; GO:0016363; GO:0009117; GO:0005730; GO:0005634; GO:0005524; GO:0005515; GO:0004386; GO:0003677; GO:0003676; GO:0000166; GO:0000018
chr7:64126510-64171404	ZNF107	NM_016220	6.36996	6.52843	0.975726	0.997694			GO:0046872; GO:0008270; GO:0008150; GO:0006355; GO:0005634; GO:0005622; GO:0005575; GO:0003677; GO:0003674
chr16:90036200-90038942	CENPBD1	NM_145039	22.5776	23.1449	0.975489	0.997694			GO:0006355; GO:0005634; GO:0003677; GO:0000775
chr11:61640997-61659119	FADS3	NM_021727	19.4631	19.9543	0.975384	0.997694			GO:0022900; GO:0020037; GO:0016717; GO:0016491; GO:0016021; GO:0016020; GO:0006810; GO:0006636; GO:0005789; GO:0005783; GO:0005624; GO:0003674
chr1:155201025-155214653	GBA	NM_001005741	64.2915	65.9413	0.974981	0.997694	ko04142; ko00600; ko00511		GO:0071356; GO:0050728; GO:0046513; GO:0046512; GO:0043407; GO:0043202; GO:0043169; GO:0035307; GO:0032715; GO:0023021; GO:0016798; GO:0016020; GO:0008219; GO:0007040; GO:0006680; GO:0006665; GO:0006629; GO:0005975; GO:0005765; GO:0005102; GO:0004348
chr20:32244892-32262264	NECAB3	NM_031231	65.6659	67.364	0.974792	0.997694			GO:0042984; GO:0019538; GO:0009306; GO:0005794; GO:0005789; GO:0005783; GO:0005737; GO:0005634; GO:0005515; GO:0005509; GO:0000137
chrX:70459473-70475047	ZMYM3	NM_001171162	3.86439	3.96435	0.974785	1			GO:0046872; GO:0022604; GO:0008270; GO:0007275; GO:0007010; GO:0005634; GO:0003677
chr1:26210676-26233368	STMN1	NM_001145454	298.4	306.119	0.974784	0.997694	ko04010		GO:0035556; GO:0030154; GO:0015631; GO:0009615; GO:0007399; GO:0007275; GO:0007165; GO:0007052; GO:0007019; GO:0005874; GO:0005856; GO:0005737; GO:0005622; GO:0004871
chr22:50691273-50695369	MAPK12	NM_002969	149.246	153.128	0.974649	0.997694	ko05140; ko04664; ko04620; ko04010; ko05131; ko04670; ko05142; ko04722; ko04660; ko05145; ko04912; ko05160; ko05014; ko04914; ko04011; ko04622; ko04621; ko04370; ko05120		GO:0051149; GO:0048011; GO:0045445; GO:0042692; GO:0007517; GO:0007265; GO:0007165; GO:0007050; GO:0006975; GO:0005829; GO:0005739; GO:0005737; GO:0005654; GO:0005625; GO:0005524; GO:0005515; GO:0004707; GO:0004674; GO:0000287; GO:0000166
chr20:30102240-30158139	HM13	NM_030789	440.136	451.877	0.974017	0.997694			GO:0033619; GO:0016021; GO:0009986; GO:0008233; GO:0005886; GO:0005789; GO:0005783; GO:0005515; GO:0004190
chr10:100188900-100206704	HPS1	NM_000195	75.4301	77.4545	0.973863	0.997694			GO:0060041; GO:0050896; GO:0048069; GO:0046983; GO:0043473; GO:0033299; GO:0032816; GO:0030318; GO:0016023; GO:0007601; GO:0007596; GO:0007040; GO:0006996; GO:0005887; GO:0005764; GO:0005737; GO:0005625; GO:0005624; GO:0005515
chr1:233119119-233431459	PCNXL2	NM_014801	19.3411	19.8612	0.973813	0.997694		pecanex-like 2 (Drosophila)	GO:0016021; GO:0016020
chr1:162466963-162499419	UHMK1	NM_175866	63.7787	65.5161	0.973481	0.997694			GO:0071598; GO:0046825; GO:0046777; GO:0045948; GO:0043021; GO:0032839; GO:0031175; GO:0030424; GO:0018105; GO:0016740; GO:0007050; GO:0005737; GO:0005634; GO:0005524; GO:0005515; GO:0004674; GO:0003723; GO:0000166
chr14:105956519-105965585	C14orf80	NM_001134875	69.7155	71.7055	0.972248	0.997694
chr15:31196054-31283825	MTMR10	NM_017762	15.6922	16.1486	0.971737	0.997694		myotubularin related protein 10	GO:0016791
chr9:140610945-140611636	EHMT1	NM_001145527	91.9077	94.6767	0.970753	0.997694	ko00310		GO:0070734; GO:0051567; GO:0046976; GO:0046974; GO:0046872; GO:0045892; GO:0034968; GO:0018027; GO:0018026; GO:0018024; GO:0016740; GO:0016571; GO:0016568; GO:0016279; GO:0009790; GO:0008270; GO:0008168; GO:0006306; GO:0005694; GO:0005634; GO:0005515; GO:0002039; GO:0000122
chr2:74753772-74757640	AUP1	NM_181575	246.982	254.56	0.970231	0.997694			GO:0043231; GO:0016021; GO:0016020; GO:0005789; GO:0005783; GO:0005730; GO:0005634
chr17:1614797-1619566	C17orf91	NR_028504	8.76827	9.03751	0.970209	0.997694
chr17:80015750-80023680	DUS1L	NM_022156	242.696	250.285	0.969679	0.997694			GO:0050660; GO:0017150; GO:0016491; GO:0008033
chr4:77963894-77997209	LOC100507473	XR_109833	140.334	144.793	0.969204	0.997694
chr14:102228039-102394329	PPP2R5C	NM_001161725	75.2336	77.7205	0.968002	0.997694	ko04113; ko04310; ko04114		GO:0043161; GO:0042771; GO:0016485; GO:0016021; GO:0008601; GO:0008285; GO:0008233; GO:0007165; GO:0006977; GO:0005694; GO:0005634; GO:0005515; GO:0005488; GO:0000775; GO:0000159
chrX:48916515-48927510	CCDC120	NM_001163321	24.003	24.7984	0.967925	0.997694
chr1:16767166-16786585	NECAP2	NM_018090	123.128	127.239	0.967691	0.997694			GO:0031410; GO:0030125; GO:0015031; GO:0006897; GO:0005905; GO:0005886; GO:0005622
chr9:127115751-127121465	LOC100129034	NR_027406	144.106	149.063	0.966746	0.997694
chr17:36507750-36558828	SOCS7	NM_014598	35.9927	37.2393	0.966525	0.997694	ko04630		GO:0045444; GO:0040008; GO:0035556; GO:0017124; GO:0016567; GO:0009968; GO:0008286; GO:0008150; GO:0005886; GO:0005737; GO:0005634; GO:0005575; GO:0005515
chr17:12894928-12921381	ELAC2	NM_018127	195.366	202.142	0.966479	0.997694	ko03013		GO:0046872; GO:0016787; GO:0008033; GO:0005739; GO:0005634; GO:0004519
chr12:96588138-96663652	ELK3	NM_005230	93.6508	96.9137	0.966332	0.997694			GO:0045892; GO:0043231; GO:0042060; GO:0032422; GO:0007165; GO:0006355; GO:0005739; GO:0005730; GO:0005634; GO:0005515; GO:0003714; GO:0003700; GO:0001525
chr1:210501595-210849638	HHAT	NM_018194	8.67241	8.97679	0.966093	0.997694			GO:0016746; GO:0016021; GO:0016020; GO:0007275; GO:0005789; GO:0005783; GO:0005525; GO:0000166
chr16:67204404-67217883	KIAA0895L	NM_001040715	35.1798	36.4355	0.965536	0.997694		KIAA0895-like
chr11:111944967-111956188	C11orf57	NM_018195	82.9102	85.8709	0.965521	0.997694
chr19:10654560-10664959	ATG4D	NM_032885	86.3884	89.5574	0.964615	0.997694	ko04140		GO:0015031; GO:0008234; GO:0008233; GO:0006914; GO:0006508; GO:0005737; GO:0004197
chr4:87856122-88062206	AFF1	NM_001166693	6.52277	6.76212	0.964604	0.997694			GO:0006355; GO:0005634; GO:0003700
chrX:49019180-49023836	MAGIX	NM_024859	2.50214	2.59519	0.964145	1
chr3:184038100-184053146	EIF4G1	NM_001194946	791.875	821.914	0.963452	0.997694	ko05416; ko03013		GO:0044419; GO:0044267; GO:0016281; GO:0016071; GO:0016070; GO:0010467; GO:0008286; GO:0008219; GO:0008135; GO:0006446; GO:0006413; GO:0006412; GO:0005829; GO:0005737; GO:0005515; GO:0003743; GO:0000289; GO:0000288
chr19:11032226-11039357	YIPF2	NM_024029	234.894	243.847	0.963284	0.997694			GO:0030133; GO:0016021; GO:0016020
chr15:85174690-85177845	SCAND2	NR_004859	18.3706	19.0739	0.963128	0.997694			GO:0016032; GO:0008150; GO:0005634; GO:0005575; GO:0003700; GO:0003674
chr19:12917362-12924462	RNASEH2A	NM_006397	269.293	279.688	0.962834	0.997694	ko03030		GO:0046872; GO:0032299; GO:0016787; GO:0006401; GO:0006260; GO:0005634; GO:0004540; GO:0004523; GO:0004519; GO:0003723
chr16:89753075-89768101	CDK10	NM_052988	120.605	125.358	0.962085	0.997694			GO:0008285; GO:0007089; GO:0005524; GO:0005515; GO:0004693; GO:0000166
chr11:67085173-67085657	LOC100130987	NR_024469	45.8003	47.6059	0.962072	0.997694
chr18:2906220-2914090	EMILIN2	NM_032048	41.5976	43.2537	0.961712	0.997694			GO:0030023; GO:0008150; GO:0007155; GO:0005581; GO:0005576; GO:0005515
chr19:38794199-38806606	YIF1B	NM_001145463	260.878	271.28	0.961656	0.997694			GO:0016021; GO:0016020
chrX:135295378-135338641	MAP7D3	NM_024597	34.063	35.4392	0.961167	0.997694			GO:0005856; GO:0005819; GO:0005813; GO:0005737; GO:0005730; GO:0005634
chr3:4402803-4508966	SUMF1	NM_182760	82.4738	85.8059	0.961167	0.997694	ko04142		GO:0046872; GO:0042803; GO:0016491; GO:0005788; GO:0005783; GO:0005488
chr5:150088308-150138082	DCTN4	NM_001135643	131.726	137.123	0.960641	0.997694	ko05016; ko04962		GO:0047485; GO:0005856; GO:0005813; GO:0005737; GO:0005634
chr1:46158872-46216490	IPP	NM_001145349	60.0327	62.5025	0.960485	0.997694			GO:0015629; GO:0005737; GO:0003779
chr19:19636850-19637120	NDUFA13	NM_015965	3488.21	3632.04	0.9604	0.997694	ko05016; ko00190; ko05010; ko05012		GO:0072593; GO:0045892; GO:0031966; GO:0030308; GO:0030262; GO:0022904; GO:0017148; GO:0016021; GO:0016020; GO:0008624; GO:0008137; GO:0006917; GO:0006915; GO:0006810; GO:0006606; GO:0005747; GO:0005746; GO:0005743; GO:0005739; GO:0005737; GO:0005654; GO:0005634; GO:0005524; GO:0005515; GO:0003954
chr12:75887868-75905438	KRR1	NM_007043	88.6332	92.2892	0.960385	0.997694		KRR1, small subunit (SSU) processome component, homolog (yeast)	GO:0030529; GO:0006364; GO:0005730; GO:0005634; GO:0003723
chr10:102246383-102279595	SEC31B	NM_015490	6.03356	6.28564	0.959896	0.997694	ko04141		GO:0031410; GO:0016192; GO:0016020; GO:0015031; GO:0012507; GO:0005789; GO:0005783; GO:0005737
chr4:26862312-27027003	STIM2	NM_001169117	43.1811	44.9869	0.959859	0.997694			GO:0051928; GO:0032237; GO:0032235; GO:0016021; GO:0006874; GO:0006811; GO:0005886; GO:0005789; GO:0005783; GO:0005515; GO:0005509; GO:0005246
chr6:35541361-35704724	FKBP5	NM_001145775	105.979	110.448	0.959538	0.997694			GO:0031072; GO:0018208; GO:0016853; GO:0016020; GO:0006457; GO:0005737; GO:0005730; GO:0005634; GO:0005528; GO:0005488; GO:0003755; GO:0000413
chr17:5404718-5487871	NLRP1	NM_033004	5.96203	6.21388	0.95947	0.997694	ko04621		GO:0072558; GO:0051402; GO:0050727; GO:0050718; GO:0045087; GO:0042981; GO:0042742; GO:0032495; GO:0019904; GO:0019899; GO:0008656; GO:0006919; GO:0006917; GO:0005829; GO:0005737; GO:0005634; GO:0005622; GO:0005524; GO:0005515; GO:0002218; GO:0000166
chr16:66541890-66584315	TK2	NM_004614	25.7671	26.865	0.959133	0.997694	ko00983; ko00240		GO:0055086; GO:0043097; GO:0016773; GO:0016740; GO:0016301; GO:0006260; GO:0006206; GO:0006139; GO:0005759; GO:0005739; GO:0005524; GO:0004797; GO:0000166
chr10:129705324-129884180	PTPRE	NM_006504	18.163	18.9455	0.958697	0.997694			GO:0046627; GO:0045111; GO:0042803; GO:0033003; GO:0016787; GO:0016021; GO:0007185; GO:0006470; GO:0006468; GO:0005886; GO:0005737; GO:0005634; GO:0005515; GO:0005001; GO:0004872; GO:0004725
chr1:249144202-249153315	ZNF692	NM_001136036	76.3086	79.6101	0.958529	0.997694			GO:0046872; GO:0008270; GO:0006355; GO:0005634; GO:0005622; GO:0003677
chr2:234160216-234204320	ATG16L1	NM_030803	65.2225	68.0974	0.957783	0.997694			GO:0051260; GO:0034045; GO:0015031; GO:0006914; GO:0005776; GO:0005737; GO:0005515; GO:0000045
chr12:56597850-56615827	RNF41	NM_194358	68.8124	71.9201	0.95679	0.997694	ko04144		GO:2000377; GO:0046872; GO:0031386; GO:0016881; GO:0016874; GO:0008270; GO:0006917; GO:0006915; GO:0005515; GO:0004842; GO:0000209
chr12:72233486-72320629	TBC1D15	NM_001146214	14.2899	14.9633	0.954997	0.997694			GO:0032851; GO:0032313; GO:0005737; GO:0005622; GO:0005515; GO:0005097; GO:0005096
chr16:90106168-90114181	LOC100130015	NR_027335	40.1789	42.1149	0.954031	0.997694
chr3:47021115-47051193	NBEAL2	NM_015175	52.103	54.6332	0.953688	0.996353			GO:0030220; GO:0005783; GO:0005488
chr17:18218588-18266867	SHMT1	NM_004169	48.7843	51.1661	0.95345	0.997694	ko00670; ko00260; ko00460; ko00680		GO:0051289; GO:0051262; GO:0046655; GO:0045329; GO:0042803; GO:0034641; GO:0030170; GO:0019264; GO:0016740; GO:0016597; GO:0009113; GO:0008732; GO:0006767; GO:0006766; GO:0006730; GO:0006565; GO:0005829; GO:0005739; GO:0005737; GO:0005634; GO:0004372
chr10:111624523-111683311	XPNPEP1	NM_020383	241.862	254.009	0.952179	0.995264			GO:0070006; GO:0046872; GO:0042803; GO:0030145; GO:0016787; GO:0010815; GO:0009987; GO:0008237; GO:0008233; GO:0006508; GO:0005829; GO:0005737; GO:0004177
chr9:99262394-99329203	CDC14B	NM_033331	29.652	31.1679	0.951363	0.997694	ko04113; ko04111; ko04110		GO:0051488; GO:0035335; GO:0031572; GO:0016787; GO:0008138; GO:0006470; GO:0006281; GO:0005730; GO:0005654; GO:0005634; GO:0004725; GO:0004722
chr10:93808351-94050875	CPEB3	NM_014912	1.59375	1.67599	0.95093	1			GO:0003723; GO:0000166
chr21:45748826-45752177	C21orf2	NM_004928	15.6766	16.4928	0.950512	0.997694			GO:0008360; GO:0008150; GO:0007010; GO:0005886; GO:0005737; GO:0003674
chr2:96931883-96939917	CIAO1	NM_004804	86.2105	90.7087	0.95041	0.995619			GO:0071817; GO:0016226; GO:0008284; GO:0007059; GO:0006357
chr17:37329708-37353908	CACNB1	NM_000723	17.8936	18.8291	0.950316	0.997694	ko05414; ko04010; ko04260; ko05412; ko05410		GO:0051925; GO:0030315; GO:0016529; GO:0008331; GO:0007411; GO:0006811; GO:0006810; GO:0006612; GO:0005891; GO:0005245; GO:0005244
chr9:131219286-131263239	ODF2	NM_002540	121.134	127.512	0.949981	0.995264			GO:0030154; GO:0019861; GO:0007283; GO:0007275; GO:0005929; GO:0005874; GO:0005856; GO:0005829; GO:0005814; GO:0005813; GO:0005737; GO:0005515; GO:0005198; GO:0000922; GO:0000278; GO:0000086
chr15:42191011-42264816	EHD4	NM_139265	150.236	158.237	0.949437	0.99457	ko04144		GO:0071363; GO:0055038; GO:0051260; GO:0050731; GO:0032456; GO:0031901; GO:0030100; GO:0006907; GO:0005886; GO:0005783; GO:0005768; GO:0005634; GO:0005525; GO:0005524; GO:0005515; GO:0005509; GO:0003924; GO:0003676; GO:0000166
chr3:155197670-155422046	PLCH1	NM_001130961	7.07063	7.44816	0.949312	0.997694			GO:0050429; GO:0048015; GO:0043231; GO:0035556; GO:0031965; GO:0016787; GO:0016042; GO:0016020; GO:0005829; GO:0005737; GO:0005624; GO:0005509; GO:0004871; GO:0004435
chr3:197339904-197354752	LOC220729	NR_003266	71.3446	75.154	0.949312	0.997694
chr16:30613948-30621682	ZNF689	NM_138447	32.3467	34.1071	0.948386	0.997694			GO:0046872; GO:0008270; GO:0006355; GO:0005634; GO:0005622; GO:0003677
chr11:129733669-129765490	NFRKB	NM_001143835	34.3955	36.2762	0.948156	0.997485			GO:0031011; GO:0006954; GO:0006366; GO:0006355; GO:0006310; GO:0006281; GO:0005730; GO:0005634; GO:0005515; GO:0003677; GO:0002020
chr9:135766734-135820020	TSC1	NM_000368	26.6968	28.1572	0.948134	0.996605	ko04910; ko04150		GO:0055007; GO:0051894; GO:0051492; GO:0051291; GO:0051087; GO:0050821; GO:0050808; GO:0047485; GO:0045859; GO:0045792; GO:0043666; GO:0043234; GO:0042552; GO:0033596; GO:0032956; GO:0032868; GO:0032862; GO:0032794; GO:0032007; GO:0030695; GO:0030426; GO:0030030; GO:0030027; GO:0021987; GO:0021766; GO:0017148; GO:0016020; GO:0009790; GO:0008286; GO:0008285; GO:0007399; GO:0007160; GO:0007050; GO:…
chr7:76090971-76135312	DTX2	NM_020892	52.7959	55.6868	0.948086	0.997694	ko04330	deltex homolog 2 (Drosophila)	GO:0046872; GO:0008270; GO:0007219; GO:0005737; GO:0005634; GO:0005515
chr9:131873227-131911226	PPP2R4	NM_178001	318.166	335.687	0.947806	0.992862			GO:0051721; GO:0046982; GO:0043666; GO:0043065; GO:0042803; GO:0035308; GO:0035307; GO:0034704; GO:0032516; GO:0032515; GO:0019211; GO:0016887; GO:0016853; GO:0008601; GO:0008160; GO:0006200; GO:0005737; GO:0005730; GO:0005634; GO:0005625; GO:0005524; GO:0005102; GO:0003755; GO:0000166; GO:0000159
chr5:6599351-6633473	NSUN2	NM_017755	180.267	190.198	0.947786	0.992754			GO:0030488; GO:0016740; GO:0016428; GO:0008168; GO:0008033; GO:0005737; GO:0005730; GO:0005634; GO:0000049
chr7:124462439-124570037	POT1	NR_003102	11.5886	12.2368	0.947029	0.997694		protection of telomeres 1 homolog (S. pombe)	GO:0060383; GO:0051974; GO:0051973; GO:0051096; GO:0043047; GO:0032508; GO:0032212; GO:0032211; GO:0032203; GO:0017151; GO:0016233; GO:0010521; GO:0007004; GO:0005694; GO:0005654; GO:0005634; GO:0005515; GO:0003677; GO:0000783; GO:0000781; GO:0000723
chr7:66204903-66270675	RABGEF1	NM_014504	64.9597	68.6206	0.94665	0.997694		RAB guanine nucleotide exchange factor (GEF) 1	GO:0055037; GO:0046872; GO:0015031; GO:0008270; GO:0006897; GO:0005769; GO:0005737; GO:0005515; GO:0003677
chr1:146215074-146250964	LOC100506032	XM_003119125	2.78642	2.94428	0.946384	1
chr5:79272538-79287216	MTX3	NM_001167741	19.2835	20.4002	0.94526	0.996701			GO:0016020; GO:0015031; GO:0006626; GO:0005741; GO:0005739
chr2:206979648-206981296	LOC100329109	NR_033248	34.7462	36.7759	0.944809	0.997694
chr5:180258252-180262726	LOC729678	NR_027183	28.9845	30.6837	0.944622	0.997694
chr11:3022151-3078681	CARS	NM_001194997	151.075	159.947	0.944532	0.992754	ko00970		GO:0046872; GO:0042803; GO:0016874; GO:0010467; GO:0006423; GO:0006418; GO:0005829; GO:0005737; GO:0005524; GO:0005515; GO:0004817; GO:0000166; GO:0000049
chr10:72058728-72142383	LRRC20	NM_207119	72.8018	77.1024	0.944222	0.995644
chr17:38465422-38513895	RARA	NM_001145301	67.852	71.8621	0.944197	0.996305	ko05200; ko05221		GO:0071391; GO:0071300; GO:0071222; GO:0061037; GO:0060591; GO:0060010; GO:0055012; GO:0051099; GO:0051018; GO:0048384; GO:0046982; GO:0046872; GO:0045947; GO:0045944; GO:0045893; GO:0045892; GO:0045787; GO:0045630; GO:0045596; GO:0044323; GO:0043565; GO:0043422; GO:0043277; GO:0043025; GO:0035264; GO:0032754; GO:0032753; GO:0032736; GO:0032720; GO:0032689; GO:0032526; GO:0032355; GO:0031490; GO:…
chr19:1459326-1473243	APC2	NM_005883	9.16304	9.70771	0.943893	0.997694	ko05217; ko05210; ko05200; ko04310; ko05213; ko04810		GO:0090090; GO:0048471; GO:0035414; GO:0031258; GO:0016342; GO:0016055; GO:0008017; GO:0008013; GO:0005886; GO:0005884; GO:0005881; GO:0005856; GO:0005794; GO:0005737; GO:0005515; GO:0000139
chr16:31500807-31502091	SLC5A2	NM_003041	264.875	280.813	0.943243	0.99457			GO:0055085; GO:0031526; GO:0016021; GO:0015758; GO:0015293; GO:0008643; GO:0006814; GO:0006811; GO:0006810; GO:0005975; GO:0005886; GO:0005362; GO:0005215
chr4:119199851-119200978	SNHG8	NR_034010	375.018	397.697	0.942974	0.99457
chr10:71561643-71718904	COL13A1	NM_001130103	11.6897	12.3987	0.942817	0.997694			GO:0030154; GO:0016337; GO:0016021; GO:0008201; GO:0007275; GO:0007160; GO:0005886; GO:0005600; GO:0005581; GO:0005515; GO:0005201; GO:0001958; GO:0001763
chr12:50794591-50873788	LARP4	NM_052879	55.6573	59.0761	0.942129	0.992586			GO:0022604; GO:0007010; GO:0003723; GO:0003676; GO:0000166
chr14:60715908-60765805	PPM1A	NM_021003	10.0138	10.632	0.941855	0.997694	ko04010		GO:0070412; GO:0045893; GO:0043123; GO:0043005; GO:0030512; GO:0030177; GO:0030145; GO:0016787; GO:0016311; GO:0016055; GO:0010991; GO:0008287; GO:0008286; GO:0008022; GO:0007165; GO:0007050; GO:0006470; GO:0005891; GO:0005829; GO:0005634; GO:0005624; GO:0005515; GO:0004871; GO:0004722; GO:0000287
chr22:19131587-19132203	DGCR14	NM_022719	58.0532	61.6756	0.941267	0.997694		DiGeorge syndrome critical region gene 14	GO:0071013; GO:0008380; GO:0007399; GO:0005634; GO:0003674; GO:0000398
chr14:24899140-24912090	KHNYN	NM_015299	80.8522	85.9758	0.940406	0.991478		KH and NYN domain containing
chr11:44785975-44972608	TP53I11	NM_006034	69.1213	73.5353	0.939974	0.992504			GO:0016021; GO:0016020; GO:0008285; GO:0006950
chr6:7107808-7252214	RREB1	NM_001003699	39.2971	41.814	0.939807	0.992518			GO:0046872; GO:0045893; GO:0016607; GO:0016604; GO:0008270; GO:0007275; GO:0007265; GO:0006366; GO:0006355; GO:0005737; GO:0005634; GO:0005622; GO:0003677
chr10:90750277-90775542	FAS	NM_000043	40.977	43.6035	0.939764	0.996701	ko05332; ko04060; ko04010; ko05010; ko04210; ko05200; ko04940; ko05330; ko04650; ko05320; ko04115; ko05142		GO:0071455; GO:0071285; GO:0071260; GO:0070848; GO:0051402; GO:0051384; GO:0050869; GO:0048536; GO:0048471; GO:0045637; GO:0045619; GO:0045121; GO:0045060; GO:0043627; GO:0043434; GO:0043065; GO:0042981; GO:0042802; GO:0042698; GO:0042493; GO:0042127; GO:0034097; GO:0032496; GO:0032464; GO:0031265; GO:0031264; GO:0031104; GO:0019900; GO:0019724; GO:0016021; GO:0010940; GO:0010467; GO:0010035; GO:…
chr8:145743368-145754458	LRRC24	NM_001024678	32.8137	34.9442	0.939031	0.996443			GO:0016021; GO:0016020
chr5:176829138-176836577	F12	NM_000505	53.604	57.0867	0.938993	0.996473	ko04610	coagulation factor XII (Hageman factor)	GO:0051919; GO:0051788; GO:0051787; GO:0045087; GO:0031638; GO:0030194; GO:0016540; GO:0016485; GO:0010756; GO:0008233; GO:0007597; GO:0007596; GO:0006508; GO:0005886; GO:0005615; GO:0005576; GO:0005515; GO:0005488; GO:0004252; GO:0002542; GO:0002353
chr10:88728187-88769960	AGAP11	NM_133447	447.397	476.764	0.938403	0.991478		ankyrin repeat and GTPase domain Arf GTPase activating protein 11	GO:0046872; GO:0032312; GO:0008270; GO:0008060
chr2:74443010-74570534	SLC4A5	NM_133478	10.5831	11.2801	0.93821	0.997394		solute carrier family 4, sodium bicarbonate cotransporter, member 5	GO:0055085; GO:0016324; GO:0016021; GO:0015701; GO:0008510; GO:0006814; GO:0006811; GO:0005886; GO:0005452; GO:0005215
chr11:532241-535550	HRAS	NM_176795	289.748	308.885	0.938045	0.992518	ko04360; ko05215; ko04810; ko04664; ko04010; ko04540; ko05214; ko04662; ko05218; ko05200; ko04062; ko05213; ko04650; ko04910; ko04722; ko04660; ko04730; ko04916; ko04510; ko04012; ko04912; ko05216; ko05160; ko04530; ko04720; ko05211; ko04144; ko05221; ko05219; ko05223; ko05220; ko04370		GO:0090398; GO:0070374; GO:0051146; GO:0050900; GO:0050679; GO:0048471; GO:0048169; GO:0048011; GO:0045740; GO:0043524; GO:0043410; GO:0035176; GO:0035022; GO:0032228; GO:0031575; GO:0030036; GO:0009887; GO:0008629; GO:0008542; GO:0008321; GO:0008286; GO:0008285; GO:0008284; GO:0008022; GO:0007596; GO:0007411; GO:0007268; GO:0007265; GO:0007264; GO:0007173; GO:0007166; GO:0007165; GO:0007050; GO:…
chr11:134201767-134246218	GLB1L2	NM_138342	34.5049	36.7967	0.937717	0.997694			GO:0043169; GO:0005975; GO:0005576; GO:0004553
chr16:29823408-29859341	MVP	NM_017458	264.609	282.194	0.937685	0.991478			GO:0051028; GO:0043231; GO:0042493; GO:0030529; GO:0015031; GO:0005737; GO:0005643; GO:0005634; GO:0005515
chr5:172483354-172566291	C5orf41	NM_153607	3.63754	3.8793	0.937679	1			GO:0043565; GO:0003700
chr1:68894506-68915499	RPE65	NM_000329	25.2468	26.9289	0.937536	0.996605	ko00830		GO:0050896; GO:0050251; GO:0047376; GO:0046872; GO:0016853; GO:0016787; GO:0007601; GO:0006776; GO:0005886; GO:0005737
chr5:133450401-133483920	TCF7	NM_003202	45.2808	48.3076	0.937343	0.995619	ko05217; ko05210; ko05215; ko05216; ko04520; ko05412; ko05200; ko04310; ko05221; ko05213; ko04916		GO:0071353; GO:0060070; GO:0048699; GO:0044212; GO:0043565; GO:0022008; GO:0016055; GO:0008013; GO:0007420; GO:0006955; GO:0006357; GO:0006355; GO:0005667; GO:0005634; GO:0005515; GO:0003700; GO:0003682
chr9:103064356-103115259	TEX10	NM_017746	87.6032	93.489	0.937043	0.992518			GO:0071339; GO:0031965; GO:0016021; GO:0016020; GO:0005730; GO:0005634; GO:0005488
chr5:145138533-145214914	PRELID2	NM_138492	8.15169	8.69971	0.937007	0.997694			GO:0005739
chr1:201617449-201796102	NAV1	NM_020443	24.4229	26.0756	0.936619	0.992504			GO:0030154; GO:0017111; GO:0007399; GO:0007275; GO:0005874; GO:0005737; GO:0001764; GO:0001578; GO:0000166
chr22:43265771-43411184	PACSIN2	NM_001184970	72.4844	77.4257	0.93618	0.992754			GO:0045806; GO:0030036; GO:0016023; GO:0008092; GO:0006810; GO:0005829; GO:0005737; GO:0005215
chr6:116596021-116601280	TSPYL1	NM_003309	147.083	157.12	0.936119	0.990843			GO:0008150; GO:0006334; GO:0005737; GO:0005730; GO:0005634; GO:0005575; GO:0003674
chr1:43849587-43855483	MED8	NM_201542	67.5144	72.2135	0.934928	0.99457			GO:0016592; GO:0010467; GO:0006357; GO:0005654; GO:0005634; GO:0005515; GO:0001104
chr20:47729874-47804925	STAU1	NM_017453	202.582	216.693	0.93488	0.991153			GO:0030529; GO:0010494; GO:0008298; GO:0005875; GO:0005791; GO:0005737; GO:0005622; GO:0005515; GO:0003725
chr3:33038099-33138314	GLB1	NM_000404	106.89	114.35	0.934762	0.992518	ko00052; ko04142; ko00531; ko00600; ko00511; ko00604	galactosidase, beta 1	GO:0048471; GO:0043169; GO:0019388; GO:0016936; GO:0005975; GO:0005764; GO:0005737; GO:0005625; GO:0005515; GO:0004565; GO:0004553
chr19:48675005-48700824	C19orf68	XM_001713770	40.809	43.6751	0.934377	0.99457			GO:0005515
chr22:39410147-39415996	APOBEC3C	NM_014508	295.703	316.481	0.934347	0.990843	ko00791		GO:0080111; GO:0046872; GO:0044419; GO:0016814; GO:0016787; GO:0010529; GO:0009615; GO:0008270
chr5:78073015-78282357	ARSB	NM_000046	6.32706	6.77522	0.933853	0.997694	ko04142; ko00531		GO:0051597; GO:0046872; GO:0043627; GO:0016787; GO:0009268; GO:0008484; GO:0007584; GO:0007417; GO:0007041; GO:0007040; GO:0006914; GO:0005794; GO:0005791; GO:0005764; GO:0005739; GO:0004065; GO:0003943; GO:0003824
chr11:46638825-46696368	KIAA0652	NM_001142673	96.761	103.615	0.933851	0.991478			GO:0070969; GO:0019901; GO:0006914; GO:0005829; GO:0005737; GO:0005515; GO:0000407; GO:0000045
chr16:69399851-69419873	TERF2	NM_005652	132.594	142.147	0.932795	0.991693			GO:0090398; GO:0070198; GO:0042803; GO:0042162; GO:0032214; GO:0032206; GO:0032205; GO:0031848; GO:0031627; GO:0030870; GO:0016233; GO:0010834; GO:0008022; GO:0007049; GO:0007004; GO:0006355; GO:0005794; GO:0005737; GO:0005730; GO:0005694; GO:0005654; GO:0005634; GO:0005515; GO:0003691; GO:0003677; GO:0001701; GO:0001673; GO:0001309; GO:0000783; GO:0000781; GO:0000723
chr12:7341758-7364079	PEX5	NM_001131026	74.9722	80.374	0.932792	0.992504	ko04146		GO:0051262; GO:0047485; GO:0016561; GO:0016020; GO:0015031; GO:0008022; GO:0006625; GO:0005829; GO:0005794; GO:0005782; GO:0005778; GO:0005777; GO:0005737; GO:0005515; GO:0005052
chr9:128199672-128469513	MAPKAP1	NM_001006617	142.015	152.353	0.932144	0.991478			GO:0048015; GO:0048011; GO:0031295; GO:0017016; GO:0016023; GO:0008543; GO:0008150; GO:0006950; GO:0005886; GO:0005829; GO:0005634
chr1:155447669-155452241	ASH1L	NM_018489	31.4309	33.7273	0.931913	0.99369	ko04530; ko00310	ash1 (absent, small, or homeotic)-like (Drosophila)	GO:0046872; GO:0030054; GO:0018024; GO:0016740; GO:0016568; GO:0008270; GO:0008168; GO:0007267; GO:0006366; GO:0006355; GO:0006323; GO:0005923; GO:0005794; GO:0005737; GO:0005730; GO:0005694; GO:0005634; GO:0003677
chr4:433642-467998	ZNF721	NM_133474	23.479	25.2045	0.93154	0.99457		zinc finger protein 721	GO:0046872; GO:0008270; GO:0006355; GO:0005634; GO:0005622; GO:0003677
chr12:120648249-120687957	PXN	NM_001080855	332.789	357.353	0.931261	0.990322	ko04062; ko04810; ko04670; ko05100; ko04510; ko04370		GO:0060396; GO:0051435; GO:0048754; GO:0048041; GO:0046872; GO:0034614; GO:0034329; GO:0030054; GO:0030032; GO:0030027; GO:0018108; GO:0017166; GO:0008270; GO:0008013; GO:0007173; GO:0007172; GO:0007165; GO:0007155; GO:0007010; GO:0006936; GO:0006928; GO:0005925; GO:0005886; GO:0005875; GO:0005856; GO:0005737; GO:0005515; GO:0000187
chr3:97660627-97691295	MINA	NM_001042533	45.9343	49.352	0.930749	0.991975		MYC induced nuclear antigen	GO:0042254; GO:0005737; GO:0005730; GO:0005634
chr8:86099909-86127272	E2F5	NM_001951	69.0643	74.2127	0.930626	0.993657	ko04350; ko04110		GO:0009887; GO:0008134; GO:0006355; GO:0005737; GO:0005667; GO:0005634; GO:0005515; GO:0003700; GO:0003677
chr11:45943195-45950647	GYLTL1B	NM_152312	145.175	156.108	0.929965	0.990843		glycosyltransferase-like 1B	GO:0046716; GO:0016757; GO:0016021; GO:0016020; GO:0005794; GO:0000139
chr19:11594241-11639987	ZNF653	NM_138783	38.2754	41.1594	0.929931	0.992518			GO:0046872; GO:0008270; GO:0006355; GO:0005634; GO:0005622; GO:0003677
chr19:17858526-17899377	FCHO1	NM_001161357	57.9985	62.4375	0.928905	0.992518
chr17:79860776-79869340	PCYT2	NM_001184917	81.6553	87.9464	0.928467	0.991478	ko00564; ko00440		GO:0016779; GO:0016740; GO:0009058; GO:0008654; GO:0005575; GO:0004306
chr13:60971426-61148013	TDRD3	NM_001146071	19.1007	20.5757	0.928313	0.996443			GO:0035064; GO:0016568; GO:0005737; GO:0005634; GO:0003713; GO:0003682
chr15:43699411-43802707	TP53BP1	NM_005657	78.4572	84.5345	0.928109	0.990322			GO:0051091; GO:0045944; GO:0045893; GO:0042162; GO:0006302; GO:0006281; GO:0005737; GO:0005694; GO:0005657; GO:0005654; GO:0005634; GO:0005622; GO:0005515; GO:0003684; GO:0002039; GO:0001104; GO:0001102; GO:0000781; GO:0000777; GO:0000724
chr5:132091696-132113561	SEPT8	NM_015146	73.5793	79.2806	0.928087	0.991478			GO:0031105; GO:0007049; GO:0005856; GO:0005737; GO:0005525; GO:0005515; GO:0000166
chr7:64254770-64294026	ZNF138	NM_001160183	14.3208	15.4388	0.927585	0.996605			GO:0046872; GO:0008270; GO:0006355; GO:0005634; GO:0005622; GO:0003700; GO:0003677
chr15:76225023-76225886	FBXO22OS	NR_003136	148.056	159.67	0.927262	0.99369		FBXO22 antisense RNA 1 (non-protein coding)
chr14:23299091-23304246	MRPL52	NM_181304	220.127	237.441	0.927081	0.991478			GO:0006412; GO:0005840; GO:0005762; GO:0005739; GO:0003735
chr1:91380854-91487139	ZNF644	NM_201269	30.7478	33.2115	0.925818	0.991478			GO:0046872; GO:0008270; GO:0006355; GO:0005634; GO:0005622; GO:0003677
chr12:3068747-3150190	TEAD4	NM_003213	93.8237	101.345	0.925785	0.991478			GO:0045944; GO:0035329; GO:0007566; GO:0007517; GO:0006357; GO:0006355; GO:0005667; GO:0005634; GO:0005515; GO:0003700; GO:0003677; GO:0001830; GO:0001825; GO:0001708; GO:0001701; GO:0001501
chr4:57301914-57327534	PAICS	NM_006452	499.57	540.011	0.925111	0.989566	ko00230	phosphoribosylaminoimidazole carboxylase, phosphoribosylaminoimidazole succinocarboxamide synthetase	GO:0055086; GO:0042802; GO:0016874; GO:0016829; GO:0009168; GO:0009113; GO:0006189; GO:0006164; GO:0006144; GO:0005829; GO:0005524; GO:0005515; GO:0004639; GO:0004638; GO:0000166
chr17:38279006-38286488	MSL1	NM_001012241	91.3613	98.8537	0.924207	0.991676		male-specific lethal 1 homolog (Drosophila)	GO:0072487; GO:0043984; GO:0016568; GO:0005730; GO:0005634
chrX:154114634-154250998	F8A1	NM_012151	108.831	117.768	0.924114	0.991478
chr2:179059194-179260877	OSBPL6	NM_032523	14.4067	15.5902	0.924087	0.99457			GO:0008289; GO:0006869; GO:0006810
chr17:80005777-80008893	RFNG	NM_002917	103.505	112.044	0.923789	0.991478	ko04330		GO:0033829; GO:0030173; GO:0030154; GO:0016757; GO:0016021; GO:0016020; GO:0009887; GO:0007399; GO:0007389; GO:0005794; GO:0005576; GO:0003674; GO:0000139
chr1:1550794-1565990	MIB2	NM_080875	43.7649	47.3989	0.923332	0.992504			GO:0046872; GO:0043123; GO:0016874; GO:0008270; GO:0007219; GO:0007165; GO:0005768; GO:0005737; GO:0004871; GO:0004842; GO:0003779
chr14:21853352-21905457	CHD8	NM_020920	63.0526	68.3021	0.923143	0.989615	ko04310		GO:0071339; GO:0070016; GO:0060070; GO:0045945; GO:0045944; GO:0045893; GO:0045892; GO:0043234; GO:0043066; GO:0043044; GO:0042393; GO:0035064; GO:0030178; GO:0016817; GO:0016568; GO:0008094; GO:0008013; GO:0005634; GO:0005524; GO:0005515; GO:0003678; GO:0003677; GO:0002039; GO:0001701; GO:0000166
chr11:13299310-13408813	ARNTL	NM_001030273	27.3797	29.6887	0.922226	0.992917	ko04711; ko04710		GO:0051879; GO:0045944; GO:0017162; GO:0007623; GO:0005667; GO:0005634; GO:0004871; GO:0003700; GO:0003677; GO:0000982
chr1:9163517-9189229	GPR157	NM_024980	12.1102	13.1343	0.922029	0.996473			GO:0016021; GO:0005886; GO:0004930; GO:0004872; GO:0004871
chr8:97243534-97247862	UQCRB	NM_006294	920.233	998.287	0.921812	0.989566	ko05016; ko00190; ko05010; ko04260; ko05012		GO:0055114; GO:0022904; GO:0016020; GO:0009060; GO:0008121; GO:0006810; GO:0006122; GO:0006119; GO:0005746; GO:0005743; GO:0005739
chr21:34896315-34915198	GART	NM_001136005	337.421	366.145	0.92155	0.989566	ko00230; ko00670		GO:0055086; GO:0048513; GO:0046872; GO:0016874; GO:0016740; GO:0010035; GO:0010033; GO:0009168; GO:0009113; GO:0009058; GO:0008168; GO:0006189; GO:0006164; GO:0006144; GO:0005829; GO:0005737; GO:0005524; GO:0004644; GO:0004641; GO:0004637; GO:0000166
chr17:26662547-26684974	TNFAIP1	NM_021137	51.9951	56.4473	0.921126	0.990843			GO:0043161; GO:0043149; GO:0035024; GO:0031463; GO:0017049; GO:0016567; GO:0016477; GO:0016020; GO:0009790; GO:0008076; GO:0006955; GO:0006915; GO:0006813; GO:0006260; GO:0005768; GO:0005737; GO:0005730; GO:0005634; GO:0005515; GO:0005249; GO:0004842
chr8:144648361-144650733	C8orf73	NM_001100878	95.9791	104.245	0.920707	0.991478		chromosome 8 open reading frame 73	GO:0005488
chr20:62169878-62178857	SRMS	NM_080823	20.0146	21.744	0.920465	0.992518			GO:0005524; GO:0004715; GO:0000166
chr17:79989989-79992080	RAC3	NM_005052	358.913	390.052	0.920167	0.990243	ko05210; ko04360; ko04810; ko04664; ko04010; ko05416; ko04520; ko04662; ko05212; ko05200; ko04310; ko04650; ko04510; ko04370		GO:0051056; GO:0050885; GO:0043025; GO:0043005; GO:0035556; GO:0031941; GO:0031175; GO:0030426; GO:0030036; GO:0030031; GO:0030027; GO:0012505; GO:0007264; GO:0006184; GO:0005886; GO:0005829; GO:0005737; GO:0005525; GO:0005515; GO:0003924; GO:0000166
chr7:106848297-107204959	COG5	NM_006348	20.1633	21.9268	0.919573	0.991719			GO:0017119; GO:0016020; GO:0015031; GO:0006891; GO:0005829; GO:0005794; GO:0005737; GO:0005730; GO:0005634; GO:0005515; GO:0003674; GO:0000139
chr19:4838345-4867780	PLIN3	NM_005817	670.989	729.677	0.91957	0.989393			GO:0043231; GO:0016192; GO:0016020; GO:0010008; GO:0005811; GO:0005794; GO:0005768; GO:0005737; GO:0005515
chr7:130146078-130371406	COPG2	NM_012133	21.228	23.0857	0.91953	0.992518			GO:0031410; GO:0030126; GO:0030117; GO:0016192; GO:0016020; GO:0006891; GO:0006890; GO:0006886; GO:0005798; GO:0005794; GO:0005737; GO:0005488; GO:0005198; GO:0000139
chr3:12938718-13008972	IQSEC1	NM_001134382	45.5328	49.5452	0.919015	0.990243	ko04144		GO:0043231; GO:0032012; GO:0030054; GO:0005737; GO:0005730; GO:0005634; GO:0005622; GO:0005086
chr19:55996491-55997757	NAT14	NM_020378	78.6198	85.5946	0.918514	0.993207			GO:0045893; GO:0016746; GO:0016021; GO:0016020; GO:0008152; GO:0008080; GO:0006352; GO:0005634; GO:0003677
chr11:125753508-125770618	HYLS1	NM_145014	31.602	34.4373	0.917668	0.992754			GO:0005886; GO:0005813; GO:0005737; GO:0005730; GO:0005634
chr9:80332187-80646234	GNAQ	NM_002072	23.5022	25.6123	0.917614	0.991478	ko04970; ko04912; ko05146; ko05010; ko04540; ko04745; ko04720; ko04972; ko04971; ko05016; ko04270; ko05142; ko04020; ko04730; ko04916		GO:0060158; GO:0050821; GO:0048066; GO:0046872; GO:0045634; GO:0043547; GO:0042733; GO:0035412; GO:0031683; GO:0031234; GO:0030168; GO:0021884; GO:0019001; GO:0016322; GO:0009791; GO:0007610; GO:0007596; GO:0007507; GO:0007215; GO:0007202; GO:0007189; GO:0007186; GO:0006471; GO:0006469; GO:0006184; GO:0005886; GO:0005834; GO:0005737; GO:0005624; GO:0005525; GO:0005515; GO:0005096; GO:0005085; GO:…
chr1:116185249-116240845	VANGL1	NM_138959	34.7588	37.9012	0.91709	0.990243	ko04310		GO:0016021; GO:0016020; GO:0007275; GO:0005515
chr17:61780191-61819330	STRADA	NM_001003787	18.1308	19.7879	0.916257	0.99457	ko04150		GO:0051291; GO:0046320; GO:0043234; GO:0032147; GO:0030295; GO:0019900; GO:0016772; GO:0008286; GO:0007050; GO:0007049; GO:0006611; GO:0006468; GO:0005829; GO:0005737; GO:0005634; GO:0005524; GO:0005515; GO:0004674; GO:0004672; GO:0001934; GO:0000166
chr12:110719031-110788898	ATP2A2	NM_001681	474.388	517.781	0.916194	0.989138	ko05010; ko04020; ko04972		GO:0070296; GO:0055085; GO:0048155; GO:0046872; GO:0034220; GO:0033017; GO:0031095; GO:0030168; GO:0016820; GO:0016787; GO:0016529; GO:0016020; GO:0008544; GO:0008022; GO:0007596; GO:0007155; GO:0006812; GO:0006810; GO:0006754; GO:0005887; GO:0005792; GO:0005789; GO:0005624; GO:0005524; GO:0005388; GO:0000166
chr16:19716972-19869483	IQCK	NM_153208	11.7184	12.791	0.916144	0.99457
chr17:46048395-46059149	CDK5RAP3	NM_176096	60.1698	65.7175	0.915583	0.991478			GO:0045664; GO:0042808; GO:0007420; GO:0005575; GO:0005515; GO:0000079
chr2:74648853-74667710	RTKN	NM_033046	61.3628	67.0661	0.91496	0.990843			GO:0045767; GO:0017049; GO:0007266; GO:0007165; GO:0006915; GO:0005622; GO:0005575; GO:0005525; GO:0005515; GO:0005095; GO:0000166
chr2:26531040-26541970	GPR113	NM_001145169	0.446393	0.48832	0.91414	1			GO:0016021; GO:0007218; GO:0007186; GO:0005886; GO:0004930; GO:0004872; GO:0004871
chr11:47586981-47600884	KBTBD4	NR_024222	60.0295	65.6838	0.913916	0.990828
chr12:7055739-7070488	PTPN6	NM_080549	121.63	133.232	0.912919	0.989594	ko05140; ko04650; ko04660; ko04520; ko04662; ko04630		GO:2000045; GO:0070372; GO:0060338; GO:0060337; GO:0060334; GO:0060333; GO:0050900; GO:0050732; GO:0035335; GO:0034329; GO:0031295; GO:0030168; GO:0030154; GO:0019901; GO:0019221; GO:0018108; GO:0016787; GO:0016020; GO:0014068; GO:0008284; GO:0008283; GO:0007596; GO:0007186; GO:0006915; GO:0006470; GO:0005829; GO:0005737; GO:0005634; GO:0005515; GO:0005001; GO:0004725
chr2:210867306-211036120	RPE	NM_199229	64.3201	70.4952	0.912404	0.990322	ko00030; ko00040; ko00710		GO:0046872; GO:0042803; GO:0042802; GO:0016853; GO:0006098; GO:0005975; GO:0005829; GO:0004750; GO:0003824
chr1:202317829-202557697	PPP1R12B	NM_002481	6.46564	7.0878	0.912221	0.991482	ko04270		GO:0043085; GO:0015629; GO:0008047; GO:0007165; GO:0006937; GO:0005886; GO:0005737
chr19:13254886-13261171	STX10	NM_003765	343.321	376.45	0.911996	0.989393	ko04130		GO:0048193; GO:0042147; GO:0016021; GO:0016020; GO:0006886; GO:0005794; GO:0005484; GO:0000139
chr20:50007139-50179168	NFATC2	NM_012340	6.84883	7.51256	0.911651	0.995264	ko04360; ko04310; ko04650; ko04660; ko04662; ko04370		GO:0050853; GO:0045944; GO:0045893; GO:0044212; GO:0043565; GO:0042493; GO:0030890; GO:0015629; GO:0006974; GO:0006355; GO:0005886; GO:0005829; GO:0005737; GO:0005730; GO:0005634; GO:0005515; GO:0003700; GO:0003677; GO:0001816
chr1:200374239-200379198	ZNF281	NM_012482	49.6403	54.469	0.91135	0.990101			GO:0046872; GO:0045893; GO:0045892; GO:0044212; GO:0043565; GO:0010629; GO:0008270; GO:0005634; GO:0005622; GO:0005515; GO:0003700
chr12:122715052-122751112	VPS33A	NM_022916	40.6779	44.6374	0.911296	0.990843			GO:0048471; GO:0048070; GO:0043473; GO:0032418; GO:0032400; GO:0031902; GO:0030897; GO:0030220; GO:0016192; GO:0016020; GO:0015031; GO:0006904; GO:0005770; GO:0005769; GO:0005765; GO:0005515
chr14:55603700-55612148	LGALS3	NM_002306	92.4674	101.589	0.910211	0.990843			GO:0045087; GO:0031012; GO:0030198; GO:0030154; GO:0019863; GO:0008380; GO:0006397; GO:0005886; GO:0005743; GO:0005737; GO:0005681; GO:0005634; GO:0005578; GO:0005576; GO:0005529; GO:0005515; GO:0001501
chr17:39878890-39890898	HAP1	NM_177977	8.16607	8.9761	0.909757	0.992518	ko05016	huntingtin-associated protein 1	GO:0015629; GO:0008104; GO:0007420; GO:0007268; GO:0005856; GO:0005515
chr17:73232693-73258444	GGA3	NR_033345	60.7599	66.7952	0.909645	0.990243	ko04142		GO:0030306; GO:0030131; GO:0016192; GO:0016020; GO:0010008; GO:0006886; GO:0005802; GO:0005768; GO:0005622; GO:0005515
chr9:117164359-117265495	DFNB31	NM_015404	21.5317	23.6745	0.909489	0.991478			GO:0060122; GO:0050953; GO:0045202; GO:0043198; GO:0043025; GO:0032420; GO:0032391; GO:0030426; GO:0030424; GO:0019904; GO:0007605; GO:0005929; GO:0005884; GO:0005737; GO:0005625; GO:0005624; GO:0005515; GO:0002142; GO:0001917; GO:0001895
chr17:76791643-76836969	USP36	NM_025090	69.0558	76.0596	0.907917	0.989075		ubiquitin specific peptidase 36	GO:0008234; GO:0008233; GO:0006511; GO:0006508; GO:0005730; GO:0005634; GO:0004221
chr12:123413538-123459982	ABCB9	NM_203444	28.9773	31.9178	0.907873	0.990843	ko04142; ko02010		GO:0055085; GO:0046980; GO:0046979; GO:0046978; GO:0042825; GO:0042803; GO:0042626; GO:0042605; GO:0042288; GO:0030176; GO:0022891; GO:0016887; GO:0016021; GO:0015833; GO:0015440; GO:0015421; GO:0015031; GO:0005886; GO:0005783; GO:0005769; GO:0005765; GO:0005743; GO:0005524; GO:0002474; GO:0001916; GO:0000166
chr9:140507301-140513308	C9orf37	NM_032937	78.4935	86.5163	0.907268	0.989546
chr3:38164200-38178733	ACAA1	NM_001607	181.913	200.507	0.907265	0.989566	ko04146; ko00071; ko01040; ko00362; ko00280; ko03320		GO:0044255; GO:0043231; GO:0033540; GO:0016747; GO:0006631; GO:0006091; GO:0005782; GO:0005777; GO:0005515; GO:0003988
chr12:56214041-56223420	DNAJC14	NM_032364	78.1097	86.1832	0.906322	0.989393		DnaJ (Hsp40) homolog, subfamily C, member 14	GO:0051082; GO:0031072; GO:0016021; GO:0016020; GO:0015031; GO:0006457; GO:0005789; GO:0005783
chr4:76567952-76598667	G3BP2	NM_203505	202.501	223.554	0.905826	0.987178			GO:0051056; GO:0051028; GO:0030159; GO:0007265; GO:0007264; GO:0007253; GO:0006810; GO:0005829; GO:0005737; GO:0005622; GO:0003723; GO:0000166
chr20:33890368-33894880	UQCC	NM_018244	105.314	116.276	0.905724	0.989566			GO:0016023; GO:0005739
chr9:104235469-104249538	C9orf125	NM_032342	51.2146	56.5661	0.905394	0.989566		chromosome 9 open reading frame 125	GO:0016021; GO:0016020
chrX:19362010-19379825	PDHA1	NM_001173454	137.775	152.254	0.904902	0.988914	ko00020; ko00290; ko00750; ko00650; ko00620		GO:0016624; GO:0016491; GO:0010510; GO:0008152; GO:0006096; GO:0006090; GO:0005759; GO:0005739; GO:0004739; GO:0004738
chr18:29671817-29711524	RNF138	NM_016271	49.1209	54.3462	0.903852	0.990101			GO:0046872; GO:0019901; GO:0016874; GO:0016055; GO:0008270; GO:0005622
chr17:27717894-27875364	TAOK1	NM_020791	36.2169	40.0699	0.903843	0.989176	ko04010		GO:0051493; GO:0046330; GO:0032874; GO:0031577; GO:0031572; GO:0030295; GO:0019901; GO:0016740; GO:0016301; GO:0006974; GO:0006915; GO:0006468; GO:0006281; GO:0005829; GO:0005737; GO:0005524; GO:0004674; GO:0004672; GO:0000278; GO:0000236; GO:0000166; GO:0000087
chr17:33426071-33446888	RAD51L3	NM_133629	22.1848	24.5585	0.903345	0.991478	ko03440		GO:0017111; GO:0008094; GO:0007131; GO:0006310; GO:0006281; GO:0005634; GO:0005524; GO:0003677; GO:0000166
chr1:154554532-154600467	ADAR	NM_001193495	272.988	302.371	0.902825	0.985399	ko04623		GO:0060337; GO:0046872; GO:0043066; GO:0031047; GO:0019221; GO:0016787; GO:0016556; GO:0016553; GO:0006397; GO:0006382; GO:0005737; GO:0005730; GO:0005654; GO:0005634; GO:0005622; GO:0003726; GO:0003725; GO:0003677
chr19:34855644-34893318	GPI	NM_001184722	852.187	944.029	0.902713	0.987079	ko00500; ko00030; ko00010; ko00520		GO:0016853; GO:0008083; GO:0007599; GO:0006959; GO:0006096; GO:0006094; GO:0006006; GO:0005975; GO:0005886; GO:0005829; GO:0005737; GO:0005730; GO:0005634; GO:0005615; GO:0005576; GO:0005125; GO:0004347; GO:0001525
chr12:122989189-123011560	RSRC2	NR_036435	94.5077	104.719	0.902489	0.989566
chr15:44163148-44487503	FRMD5	NM_032892	76.5767	84.861	0.902378	0.988914			GO:0019898; GO:0016021; GO:0016020; GO:0008150; GO:0008092; GO:0005856; GO:0005737; GO:0005575; GO:0005488; GO:0003674
chr4:90031863-90036052	LOC731282	XM_001717170	15.5275	17.2197	0.901729	0.991478
chr3:9944295-9958086	IL17RE	NM_153483	21.9361	24.3294	0.901629	0.991478			GO:0016021; GO:0016020; GO:0005737; GO:0005576; GO:0004872
chr17:38076214-38083865	ORMDL3	NM_139280	90.1226	100.027	0.900983	0.989138			GO:0035339; GO:0016021; GO:0016020; GO:0006672; GO:0005789; GO:0005783; GO:0005515
chr1:209953741-209957952	C1orf74	NM_152485	17.829	19.7944	0.900709	0.990843
chr3:10326102-10335133	GHRLOS	NR_004431	4.94339	5.49346	0.899868	0.99457
chr17:45727163-45762828	KPNB1	NM_002265	410.036	456.099	0.899007	0.984283	ko03013		GO:0046796; GO:0044419; GO:0043234; GO:0031965; GO:0019904; GO:0019058; GO:0016032; GO:0008565; GO:0008270; GO:0008139; GO:0006921; GO:0006915; GO:0006610; GO:0006607; GO:0006606; GO:0006309; GO:0005829; GO:0005737; GO:0005654; GO:0005643; GO:0005634; GO:0005515; GO:0000060
chr2:25961249-26101379	ASXL2	NM_018263	49.1351	54.6562	0.898985	0.987948		additional sex combs like 2 (Drosophila)	GO:0046872; GO:0006355; GO:0005634
chr1:22379119-22417296	CDC42	NM_001039802	173.891	193.456	0.898866	0.989138	ko04360; ko05130; ko04810; ko04010; ko04666; ko05200; ko05131; ko04062; ko04670; ko04722; ko04660; ko04510; ko04912; ko04530; ko05100; ko04520; ko04011; ko05211; ko05212; ko04144; ko05120; ko04370		GO:0090136; GO:0072686; GO:0071777; GO:0071338; GO:0060789; GO:0060684; GO:0060070; GO:0051988; GO:0051647; GO:0051489; GO:0051301; GO:0051233; GO:0051149; GO:0051056; GO:0051017; GO:0048664; GO:0046847; GO:0046330; GO:0045859; GO:0045740; GO:0045177; GO:0043552; GO:0043497; GO:0042995; GO:0042692; GO:0042176; GO:0042059; GO:0035264; GO:0035088; GO:0034613; GO:0034332; GO:0033138; GO:0031996; GO:…
chr9:37887324-37904380	MCART1	NR_024872	51.7946	57.7196	0.897349	0.990322			GO:0016021; GO:0016020; GO:0006810; GO:0005743; GO:0005739
chr1:70671364-70717703	SFRS11	NM_004768	101.771	113.445	0.897096	0.988914			GO:0031124; GO:0010467; GO:0008380; GO:0006406; GO:0006397; GO:0006369; GO:0006366; GO:0005730; GO:0005654; GO:0005634; GO:0005515; GO:0003723; GO:0003676; GO:0000398; GO:0000166
chr9:136890560-136898822	NCRNA00094	NR_015427	36.3271	40.5311	0.896277	0.98891
chr10:51371378-51734610	NCOA4	NM_001145260	192.464	214.758	0.89619	0.983756	ko05200; ko05216		GO:0050681; GO:0045893; GO:0030521; GO:0008584; GO:0005634; GO:0004872; GO:0003713
chrX:146990948-147003676	ASFMR1	NR_024502	8.76508e-05	9.78069e-05	0.896162	1
chr22:31835344-31885874	EIF4ENIF1	NM_019843	48.9298	54.6218	0.895793	0.989546			GO:0043231; GO:0015031; GO:0008565; GO:0005829; GO:0005737; GO:0005634; GO:0005515
chr16:46691956-46723144	VPS35	NM_018206	105.493	117.795	0.895564	0.984826		vacuolar protein sorting 35 homolog (S. cerevisiae)	GO:0042147; GO:0016020; GO:0015031; GO:0005829; GO:0005768; GO:0005737; GO:0005515
chr2:114356604-114361294	MGC13005	NR_024004	27.7578	31.0058	0.895245	0.990843
chr9:100000707-100059596	KIAA1529	NR_036528	7.21454	8.05998	0.895106	0.991693
chr14:63840588-64010079	PPP2R5E	NM_006246	50.7856	56.7509	0.894886	0.989138	ko04113; ko04310; ko04114		GO:0043231; GO:0008601; GO:0007165; GO:0005737; GO:0005515; GO:0000159
chr17:55333930-55710544	MSI2	NM_138962	42.7351	47.7562	0.89486	0.990243			GO:0048864; GO:0008266; GO:0005844; GO:0005737; GO:0003727; GO:0000166
chr8:95835487-95894026	INTS8	NM_017864	57.7996	64.6135	0.894544	0.988388			GO:0032039; GO:0016180; GO:0005634; GO:0005515
chrX:149861852-149932647	MTMR1	NM_003828	46.3921	51.8638	0.894499	0.989546	ko00051		GO:0016791; GO:0016787; GO:0005886; GO:0005737; GO:0004725; GO:0004438
chr3:183852781-183863099	EIF2B5	NM_003907	94.8479	106.096	0.893982	0.988355	ko03013		GO:0051716; GO:0048708; GO:0045948; GO:0044267; GO:0043434; GO:0042552; GO:0032057; GO:0031369; GO:0016740; GO:0016070; GO:0014003; GO:0014002; GO:0010467; GO:0009749; GO:0009408; GO:0006950; GO:0006417; GO:0006413; GO:0006412; GO:0005851; GO:0005829; GO:0005737; GO:0005634; GO:0005515; GO:0005085; GO:0003743; GO:0001541
chr1:26146444-26159434	LOC646471	NR_024498	7.07994	7.92728	0.893111	0.991478
chr2:110550334-110615263	RGPD5	NM_005054	51.3443	57.4986	0.892966	0.985409
chr19:35491234-35517373	GRAMD1A	NM_020895	127.434	142.784	0.892495	0.987079			GO:0016021; GO:0016020
chr8:22102618-22111182	POLR3D	NM_001722	54.3419	60.9144	0.892103	0.988663	ko04623; ko00230; ko00240; ko03020		GO:0045089; GO:0032728; GO:0009615; GO:0006386; GO:0006385; GO:0006383; GO:0005666; GO:0005654; GO:0005634; GO:0003899; GO:0003677
chr10:104154228-104162281	NFKB2	NM_001077494	148.965	166.985	0.892086	0.983413	ko05200; ko04010		GO:0051092; GO:0048536; GO:0045087; GO:0034142; GO:0034138; GO:0034134; GO:0034130; GO:0033257; GO:0030198; GO:0008063; GO:0007165; GO:0006355; GO:0005829; GO:0005737; GO:0005730; GO:0005654; GO:0005634; GO:0005515; GO:0003713; GO:0003700; GO:0003677; GO:0002756; GO:0002755; GO:0002467; GO:0002268; GO:0002224
chr9:131707808-131710036	DOLK	NM_014908	101.599	113.94	0.891689	0.988914	ko00510		GO:0044267; GO:0043687; GO:0043048; GO:0030176; GO:0018279; GO:0016740; GO:0016021; GO:0016020; GO:0006489; GO:0006488; GO:0005789; GO:0005783; GO:0005624; GO:0004168
chr1:36348809-36391766	EIF2C1	NM_012199	41.8566	46.9869	0.890814	0.984628			GO:0035278; GO:0035068; GO:0031047; GO:0030529; GO:0006417; GO:0006355; GO:0005844; GO:0005829; GO:0005737; GO:0005515; GO:0003743; GO:0003723; GO:0003676; GO:0000956; GO:0000932
chr7:128594233-128697293	TNPO3	NM_001191028	43.2113	48.53	0.890404	0.990843			GO:0043231; GO:0035048; GO:0015031; GO:0005737; GO:0005730; GO:0005634; GO:0005515; GO:0004872
chr1:41154751-41237275	NFYC	NM_001142587	862.101	968.297	0.890327	0.991478	ko04612		GO:0045893; GO:0043565; GO:0016602; GO:0006457; GO:0006357; GO:0006355; GO:0005634; GO:0005622; GO:0005515; GO:0003713; GO:0003700; GO:0003677
chr4:144434615-144475646	SMARCA5	NM_003601	148.826	167.202	0.890097	0.982422			GO:0045893; GO:0043596; GO:0043044; GO:0042393; GO:0034080; GO:0031491; GO:0031213; GO:0016887; GO:0016818; GO:0016787; GO:0016589; GO:0016584; GO:0009790; GO:0006357; GO:0006352; GO:0006338; GO:0006334; GO:0006333; GO:0006302; GO:0006200; GO:0005730; GO:0005677; GO:0005654; GO:0005634; GO:0005524; GO:0005515; GO:0004386; GO:0003677; GO:0000793; GO:0000183; GO:0000166
chr2:74588280-74619214	DCTN1	NM_004082	259.945	292.252	0.889455	0.981508	ko05016; ko04962		GO:0031252; GO:0008219; GO:0007399; GO:0007067; GO:0005874; GO:0005868; GO:0005856; GO:0005829; GO:0005813; GO:0005737; GO:0005515; GO:0003774; GO:0000922; GO:0000776; GO:0000278; GO:0000086
chr17:65821597-65980494	BPTF	NM_004459	31.4587	35.3981	0.888712	0.985399			GO:0046872; GO:0045893; GO:0043565; GO:0016589; GO:0008270; GO:0008134; GO:0008094; GO:0007420; GO:0006355; GO:0006351; GO:0006338; GO:0005737; GO:0005730; GO:0005634; GO:0005515; GO:0000122
chr1:111729593-111743281	DENND2D	NM_024901	36.3763	40.9475	0.888364	0.989566
chrX:118604852-118605268	SLC25A5	NM_001152	2704.94	3045.26	0.888246	0.982422	ko05016; ko04020; ko05012		GO:0071817; GO:0055085; GO:0050796; GO:0044419; GO:0042645; GO:0016032; GO:0016020; GO:0015853; GO:0015207; GO:0007059; GO:0006810; GO:0006112; GO:0005887; GO:0005743; GO:0005739; GO:0005515; GO:0005215
chr16:67143914-67184912	B3GNT9	NM_033309	11.2596	12.6957	0.886883	0.990843		UDP-GlcNAc:betaGal beta-1,3-N-acetylglucosaminyltransferase 9	GO:0016757; GO:0016021; GO:0016020; GO:0008378; GO:0006486; GO:0005794; GO:0000139
chr19:44111423-44112262	ZNF428	NM_182498	112.436	126.984	0.885434	0.989566			GO:0046872; GO:0008270; GO:0005622
chr5:176513865-176525262	FGFR4	NM_213647	122.271	138.16	0.884996	0.982422	ko04144; ko04810; ko04010		GO:2000573; GO:2000188; GO:0070857; GO:0070374; GO:0055062; GO:0048603; GO:0048602; GO:0048554; GO:0046777; GO:0045862; GO:0042593; GO:0019216; GO:0018108; GO:0017134; GO:0016477; GO:0010715; GO:0008543; GO:0008286; GO:0008284; GO:0008201; GO:0005911; GO:0005887; GO:0005886; GO:0005783; GO:0005768; GO:0005737; GO:0005730; GO:0005634; GO:0005576; GO:0005524; GO:0005007; GO:0004872; GO:0004713; GO:…
chr3:44666510-44689963	ZNF197	NM_006991	12.7096	14.3617	0.884965	0.990843			GO:0046872; GO:0016032; GO:0008270; GO:0006355; GO:0005634; GO:0005622; GO:0003700; GO:0003677; GO:0003676
chr4:139162946-139163618	SLC7A11	NM_014331	75.7447	85.6198	0.884663	0.990322			GO:0070306; GO:0055085; GO:0050900; GO:0035094; GO:0034641; GO:0016021; GO:0015327; GO:0015171; GO:0009636; GO:0007596; GO:0007420; GO:0006979; GO:0006865; GO:0006811; GO:0005886; GO:0005856; GO:0005792; GO:0005791; GO:0005515
chr9:15422781-15462648	SNAPC3	NM_001039697	29.0741	32.9087	0.883478	0.989393			GO:0009301; GO:0006383; GO:0006366; GO:0006355; GO:0005654; GO:0005634; GO:0003677
chr16:3493667-3536963	NAT15	NM_001083601	72.6091	82.1966	0.883359	0.988355			GO:0017196; GO:0016746; GO:0008152; GO:0008080; GO:0007059; GO:0005575; GO:0004596
chr1:52082546-52254891	OSBPL9	NM_148906	84.9239	96.1595	0.883157	0.983413			GO:0008289; GO:0006869; GO:0006810
chr1:9988957-10002868	LZIC	NM_032368	37.6758	42.7055	0.882224	0.989566			GO:0010212; GO:0008013
chr11:77376327-77531880	RSF1	NM_016578	37.7343	42.7945	0.881756	0.985674			GO:0050434; GO:0046872; GO:0045893; GO:0045892; GO:0043392; GO:0042393; GO:0034080; GO:0031213; GO:0016887; GO:0016584; GO:0008270; GO:0006352; GO:0006338; GO:0006334; GO:0005654; GO:0005634; GO:0005515
chr10:89096540-89096648	LOC728190	NR_024397	2567.45	2912.58	0.881504	0.994163
chr1:11838542-11849642	LOC100506310	XM_003118849	5.52277	6.26517	0.881504	0.992504
chr10:75012548-75014107	LOC100507212	XR_110413	11.706	13.2796	0.881502	0.994163
chr1:175126122-175162229	KIAA0040	NM_001162893	49.7009	56.3981	0.881251	0.985409
chr14:104199320-104313940	PPP1R13B	NM_015316	32.6729	37.078	0.881194	0.987407		protein phosphatase 1, regulatory (inhibitor) subunit 13B	GO:0045786; GO:0006917; GO:0006915; GO:0005886; GO:0005737; GO:0005730; GO:0005634; GO:0005515
chr1:155916629-155947989	ARHGEF2	NM_001162383	75.7632	85.9843	0.881128	0.982422	ko05130		GO:0051301; GO:0051092; GO:0051056; GO:0050768; GO:0048365; GO:0048011; GO:0046872; GO:0043198; GO:0043025; GO:0042995; GO:0042127; GO:0035556; GO:0035023; GO:0032587; GO:0030676; GO:0030054; GO:0017048; GO:0008624; GO:0008270; GO:0008017; GO:0007264; GO:0007067; GO:0007049; GO:0007026; GO:0007015; GO:0006915; GO:0006886; GO:0005923; GO:0005886; GO:0005874; GO:0005856; GO:0005829; GO:0005819; GO:…
chr12:57984941-57997211	PIP4K2C	NM_001146258	106.664	121.114	0.880691	0.983413	ko04070; ko00562; ko04810		GO:0042802; GO:0016740; GO:0016309; GO:0016020; GO:0005737; GO:0005730; GO:0005634; GO:0005524; GO:0000166
chr2:209130970-209223475	PIKFYVE	NM_015040	19.9421	22.6457	0.880613	0.986638	ko04070; ko00562; ko04810; ko04145	phosphoinositide kinase, FYVE finger containing	GO:0048471; GO:0046872; GO:0045121; GO:0044267; GO:0042147; GO:0035556; GO:0034504; GO:0031901; GO:0031410; GO:0016740; GO:0016308; GO:0016020; GO:0012506; GO:0010008; GO:0008270; GO:0006898; GO:0005829; GO:0005768; GO:0005524; GO:0005515; GO:0000285; GO:0000166
chr14:74523621-74551196	ALDH6A1	NM_005589	14.9276	16.9557	0.880388	0.989566	ko00562; ko00640; ko00280		GO:0034641; GO:0019859; GO:0018478; GO:0016491; GO:0009083; GO:0006573; GO:0005759; GO:0005739; GO:0005730; GO:0005634; GO:0004491; GO:0000062
chr22:23980673-24032777	LOC91316	NR_024448	35.5592	40.4204	0.879734	0.990243
chr18:21228362-21242849	ANKRD29	NM_173505	34.1253	38.8063	0.879375	0.990322
chr10:32094556-32217770	ARHGAP12	NM_018287	92.6771	105.399	0.879298	0.980889		Rho GTPase activating protein 12	GO:0051056; GO:0007264; GO:0007165; GO:0005829; GO:0005622; GO:0005096
chr1:203771867-203823256	ZC3H11A	NM_014827	128.423	146.08	0.879128	0.979944		zinc finger CCCH-type containing 11A	GO:0046872; GO:0008270; GO:0005515; GO:0003676
chr10:28821426-28909925	WAC	NM_016628	149.076	169.641	0.878773	0.980056			GO:0071894; GO:0045893; GO:0016607; GO:0016568; GO:0010390; GO:0006974; GO:0005681; GO:0005634; GO:0005515; GO:0003682; GO:0000993; GO:0000075
chr3:17198653-17784240	TBC1D5	NM_001134381	27.1313	30.8872	0.878399	0.987413			GO:0005622; GO:0005515; GO:0005097; GO:0005096
chr2:98272401-98280561	ACTR1B	NM_005735	96.4415	109.814	0.878226	0.98439			GO:0005869; GO:0005856; GO:0005813; GO:0005737; GO:0005524; GO:0005515; GO:0000166
chr6:43027628-43035135	KLC4	NM_201523	4.7221	5.37948	0.877799	0.997694			GO:0005874; GO:0005871; GO:0005856; GO:0005737; GO:0005488; GO:0003777
chr17:7284364-7297870	PLSCR3	NM_020360	127.572	145.384	0.877483	0.982422			GO:0048306; GO:0017128; GO:0017124; GO:0017121; GO:0016021; GO:0005886; GO:0005515; GO:0005509
chr2:32390909-32449324	SLC30A6	NM_001193513	23.0995	26.3513	0.876598	0.989075			GO:0055085; GO:0016021; GO:0016020; GO:0008324; GO:0006829; GO:0005794; GO:0000139
chr8:29952908-29995865	LEPROTL1	NM_001128208	96.6029	110.21	0.876535	0.988355			GO:0016021; GO:0016020
chr18:3594080-3598031	FLJ35776	NR_024101	36.4496	41.5934	0.876331	0.989566
chrX:71798663-71934166	PHKA1	NM_002637	26.3587	30.0845	0.876155	0.986886	ko04910; ko04020		GO:0046777; GO:0006091; GO:0006006; GO:0005980; GO:0005977; GO:0005976; GO:0005975; GO:0005964; GO:0005886; GO:0005829; GO:0005516; GO:0004689; GO:0004339; GO:0003824
chr20:37049238-37064018	LOC388796	NR_015366	125.671	143.45	0.876061	0.988914
chr1:115247077-115300671	CSDE1	NM_001130523	193.636	221.054	0.875967	0.977825			GO:0008584; GO:0006355; GO:0005737; GO:0003723; GO:0003677
chr1:116947335-116961244	C1orf203	NR_024126	17.4544	19.9496	0.874925	0.990243
chr12:110971097-111021112	PPTC7	NM_139283	47.5215	54.3357	0.874591	0.982422			GO:0046872; GO:0016787; GO:0005739; GO:0004721
chr1:161284109-161338760	C1orf192	NM_001013625	43.072	49.257	0.874434	0.985143
chr11:124492741-124506338	TBRG1	NM_032811	40.8288	46.7416	0.8735	0.982422			GO:0050821; GO:0032066; GO:0008285; GO:0007050; GO:0007049; GO:0006260; GO:0005634; GO:0005515; GO:0003677
chr1:65210578-65432248	JAK1	NM_002227	66.5406	76.1901	0.87335	0.979854	ko05212; ko05200; ko05140; ko05160; ko05145; ko04630	Janus kinase 1	GO:0060338; GO:0060337; GO:0060334; GO:0060333; GO:0046677; GO:0035556; GO:0019221; GO:0018108; GO:0016020; GO:0012505; GO:0007243; GO:0007167; GO:0006468; GO:0005856; GO:0005829; GO:0005737; GO:0005634; GO:0005524; GO:0005515; GO:0005131; GO:0004715; GO:0004713; GO:0000166
chr3:49020628-49022957	ARIH2	NM_006321	104.298	119.503	0.872765	0.982422			GO:0071425; GO:0070936; GO:0070534; GO:0048588; GO:0046872; GO:0042787; GO:0016874; GO:0008270; GO:0007275; GO:0005737; GO:0005634; GO:0005515; GO:0004842; GO:0003676; GO:0000209
chr1:201962913-201963772	LOC100506636	XR_108328	18.9583	21.7262	0.872601	0.991478
chr14:77803952-77843443	TMED8	NM_213601	32.4636	37.2033	0.8726	0.985399			GO:0016021; GO:0006810
chr19:15224339-15236591	ILVBL	NM_006844	73.5243	84.2589	0.8726	0.982422			GO:0030976; GO:0016740; GO:0016021; GO:0016020; GO:0008150; GO:0005575; GO:0003674; GO:0000287
chr2:204298537-204400058	RAPH1	NM_203365	12.8285	14.7151	0.871792	0.986955			GO:0030175; GO:0030027; GO:0007165; GO:0007160; GO:0005886; GO:0005856; GO:0005737
chr1:236686738-236767841	LGALS8	NM_006499	36.8171	42.27	0.870998	0.983315			GO:0005737; GO:0005615; GO:0005529
chr7:73150423-73153192	ABHD11	NM_148912	117.745	135.245	0.870605	0.985409			GO:0016787; GO:0008150; GO:0005739; GO:0005575; GO:0003674
chr16:1559752-1662115	IFT140	NM_014714	39.1359	44.9734	0.870201	0.982422
chr1:38261159-38267278	MANEAL	NM_001113482	56.89	65.3929	0.869972	0.986638			GO:0016787; GO:0016021; GO:0016020; GO:0005794; GO:0000139
chr3:31574060-31679088	STT3B	NM_178862	166.128	191.296	0.868434	0.977674	ko04141; ko00510		GO:0018279; GO:0016740; GO:0016021; GO:0016020; GO:0008250; GO:0006486; GO:0005783; GO:0004579
chr12:58118467-58135981	AGAP2	NM_001122772	55.7291	64.1947	0.868126	0.982087	ko04144		GO:0046872; GO:0043524; GO:0042177; GO:0032312; GO:0015031; GO:0008270; GO:0008060; GO:0007411; GO:0007264; GO:0005739; GO:0005737; GO:0005730; GO:0005634; GO:0005622; GO:0005525; GO:0000166
chrX:106366656-106449718	NUP62CL	NM_017681	15.3512	17.6912	0.867731	0.989566			GO:0017056; GO:0015031; GO:0005643
chr7:129984629-130008571	CPA5	NM_001127441	1.14086	1.31528	0.867389	1			GO:0046872; GO:0008270; GO:0008237; GO:0008233; GO:0008152; GO:0006508; GO:0005576; GO:0004181
chr6:31110215-31126015	CCHCR1	NM_001105564	51.6574	59.5662	0.867227	0.986638			GO:0030154; GO:0007275; GO:0005737; GO:0005634
chr9:42674388-42714961	CBWD7	XM_001717050	47.5806	54.8684	0.867177	0.989393			GO:0005524; GO:0000166
chr11:47290926-47351582	MADD	NM_003682	51.0795	58.9075	0.867114	0.980056			GO:0051726; GO:0042981; GO:0030295; GO:0017112; GO:0016021; GO:0007166; GO:0005886; GO:0005737; GO:0005515; GO:0005123; GO:0005085; GO:0001934; GO:0000187
chr11:62430223-62432689	C11orf48	NM_024099	513.575	592.574	0.866685	0.979854		chromosome 11 open reading frame 48
chr2:241065979-241075764	MYEOV2	NM_138336	284.526	328.383	0.866446	0.983756
chr19:33622997-33667758	WDR88	NM_173479	5.5245	6.37905	0.866038	0.990631		WD repeat domain 88
chr15:73344824-73597547	NEO1	NM_002499	41.6334	48.1662	0.86437	0.979854	ko04514		GO:0051149; GO:0042692; GO:0007411; GO:0007155; GO:0005887; GO:0005886
chr19:58987732-58992597	ZNF446	NM_017908	19.4338	22.5063	0.863483	0.989393		zinc finger protein 446	GO:0046872; GO:0016032; GO:0008270; GO:0005634; GO:0005622; GO:0003700; GO:0003677
chr3:129366634-129612451	TMCC1	NM_001017395	12.5297	14.5148	0.863236	0.988355			GO:0016021; GO:0016020
chr4:77963894-77997209	CCNI	NM_006835	214.023	247.961	0.863132	0.976652			GO:0007283
chrX:100870107-100872991	ARMCX6	NR_033670	170.308	197.397	0.862769	0.985399			GO:0016021; GO:0016020
chr1:110598456-110613322	ALX3	NM_006492	16.3937	19.0035	0.862667	0.986449		ALX homeobox 3	GO:0043565; GO:0007275; GO:0005634; GO:0003700
chr3:38179968-38184513	MYD88	NM_001172567	81.1302	94.0523	0.862607	0.981292	ko05140; ko05144; ko04620; ko05142; ko05145; ko04210		GO:0071260; GO:0070976; GO:0070935; GO:0070555; GO:0051092; GO:0050830; GO:0050727; GO:0050671; GO:0048661; GO:0048011; GO:0046330; GO:0045944; GO:0045351; GO:0045087; GO:0045080; GO:0044130; GO:0043123; GO:0042802; GO:0042127; GO:0034142; GO:0034134; GO:0034130; GO:0032760; GO:0032755; GO:0032747; GO:0032740; GO:0032496; GO:0032494; GO:0031663; GO:0019221; GO:0016064; GO:0010008; GO:0009615; GO:…
chr12:53443830-53459753	TENC1	NM_170754	65.7426	76.2271	0.862457	0.977825			GO:0046872; GO:0035556; GO:0030054; GO:0016787; GO:0008285; GO:0005925; GO:0005886; GO:0005515; GO:0004721
chr9:21967137-21968330	C9orf53	NR_024274	62.8249	72.8701	0.862149	0.988388
chr16:1756200-1823149	MAPK8IP3	NM_001040439	133.64	155.078	0.86176	0.972596	ko04010		GO:0060425; GO:0048286; GO:0046328; GO:0031435; GO:0031434; GO:0030900; GO:0030673; GO:0030425; GO:0019901; GO:0019894; GO:0016192; GO:0010468; GO:0009791; GO:0008432; GO:0008104; GO:0007585; GO:0007411; GO:0007257; GO:0005886; GO:0005790; GO:0005737; GO:0005625; GO:0005078; GO:0001701; GO:0000139
chr7:65338256-65422214	VKORC1L1	NM_173517	61.4235	71.3109	0.861348	0.98008			GO:0016021; GO:0016020
chr3:137906126-138016704	ARMC8	NM_015396	30.0231	34.867	0.861075	0.983581			GO:0005488
chr3:49924434-49941313	MST1R	NM_002447	56.1941	65.3281	0.860183	0.979272		macrophage stimulating 1 receptor (c-met-related tyrosine kinase)	GO:0045087; GO:0009615; GO:0008284; GO:0007338; GO:0007275; GO:0007169; GO:0007165; GO:0006952; GO:0006928; GO:0005887; GO:0005886; GO:0005524; GO:0005515; GO:0005011; GO:0004872; GO:0001725; GO:0000166
chr4:26321297-26436564	RBPJ	NM_005349	13.6703	15.9421	0.857497	0.988355	ko04330		GO:0045892; GO:0010467; GO:0007221; GO:0006355; GO:0006310; GO:0005737; GO:0005730; GO:0005654; GO:0005634; GO:0005515; GO:0003700; GO:0003677; GO:0002193; GO:0001077; GO:0000150
chr11:3010974-3012574	LOC100505870	XM_003118633	1.59025	1.85556	0.857019	1
chr7:128530000-128550773	KCP	NM_001135914	0.930426	1.08566	0.857014	1			GO:0005576
chr9:96207939-96215874	FAM120AOS	NM_198841	57.1812	66.772	0.856365	0.980056		family with sequence similarity 120A opposite strand
chr11:118895060-118901616	SLC37A4	NM_001164278	128.967	150.649	0.856076	0.978773	ko04973		GO:0055085; GO:0042593; GO:0030176; GO:0016021; GO:0016020; GO:0015760; GO:0015758; GO:0015152; GO:0008645; GO:0008643; GO:0006810; GO:0006006; GO:0005975; GO:0005789; GO:0005783; GO:0005215
chr9:134378288-134400611	POMT1	NM_001077365	8.62749	10.0782	0.856055	0.989428	ko00514		GO:0046872; GO:0030198; GO:0016757; GO:0016529; GO:0016021; GO:0016020; GO:0007275; GO:0006493; GO:0005975; GO:0005789; GO:0005783; GO:0004169; GO:0001669; GO:0000030
chr12:9067191-9095210	PHC1	NM_004426	72.6353	84.878	0.855761	0.975734			GO:0046872; GO:0035102; GO:0031519; GO:0008270; GO:0007275; GO:0005730; GO:0005634; GO:0003677
chr11:65837761-66012844	PACS1	NM_018026	68.9205	80.5579	0.85554	0.977094			GO:0050690; GO:0048471; GO:0044419; GO:0034613; GO:0032092; GO:0030137; GO:0016032; GO:0005829; GO:0005794; GO:0005515; GO:0000042
chr3:9958913-9975314	IL17RC	NM_153461	18.5564	21.6907	0.8555	0.988914			GO:0016021; GO:0005886; GO:0004872
chr19:19256375-19281101	LOC729991-MEF2B	NR_027307	34.716	40.5837	0.855417	0.988914
chr22:29999544-30094589	NF2	NM_181832	45.5932	53.3111	0.855229	0.978773			GO:0070306; GO:0051496; GO:0048471; GO:0046426; GO:0045216; GO:0043409; GO:0042524; GO:0042518; GO:0042475; GO:0035330; GO:0032587; GO:0032154; GO:0031527; GO:0030336; GO:0030036; GO:0030027; GO:0022408; GO:0019898; GO:0014010; GO:0008285; GO:0008156; GO:0008092; GO:0007398; GO:0006469; GO:0005912; GO:0005886; GO:0005856; GO:0005769; GO:0005737; GO:0005730; GO:0005634; GO:0005515; GO:0001953; GO:…
chr18:12446495-12656731	SPIRE1	NM_001128626	30.0521	35.1531	0.854892	0.982123	ko04320		GO:0048471; GO:0006810; GO:0005856; GO:0005737; GO:0003779
chr2:63277936-63284963	OTX1	NM_014562	39.5749	46.3079	0.854604	0.982994			GO:0043565; GO:0042472; GO:0030901; GO:0030900; GO:0009952; GO:0007275; GO:0006357; GO:0006355; GO:0005634; GO:0003700
chr9:35829221-35854844	TMEM8B	NM_001042589	14.8892	17.4246	0.854493	0.989393		transmembrane protein 8B	GO:0040008; GO:0016021; GO:0009986; GO:0007346; GO:0007160; GO:0007155; GO:0005886; GO:0005783; GO:0005739; GO:0005737; GO:0005634; GO:0005515
chr7:16685758-16746148	BZW2	NM_001159767	369.102	432.332	0.853747	0.97171			GO:0030154; GO:0016070; GO:0007399; GO:0007275; GO:0005488
chr9:139942552-139948527	ENTPD2	NM_203468	40.2435	47.177	0.853032	0.983413	ko00230		GO:0030168; GO:0017111; GO:0017110; GO:0016787; GO:0016021; GO:0016020; GO:0009181; GO:0007186; GO:0005605; GO:0005524; GO:0000166
chr14:100705090-100747317	YY1	NM_003403	121.664	142.665	0.852795	0.969736			GO:0051276; GO:0048593; GO:0046872; GO:0044212; GO:0034644; GO:0031519; GO:0031011; GO:0030154; GO:0016363; GO:0010225; GO:0009952; GO:0008270; GO:0007283; GO:0006974; GO:0006403; GO:0006357; GO:0006310; GO:0006281; GO:0005886; GO:0005667; GO:0005634; GO:0005622; GO:0005515; GO:0003723; GO:0003714; GO:0003713; GO:0003700; GO:0003677; GO:0000724; GO:0000400; GO:0000122
chr5:61601985-61682939	KIF2A	NM_004520	47.7951	56.0896	0.852121	0.979854			GO:0051301; GO:0030154; GO:0007596; GO:0007399; GO:0007275; GO:0007052; GO:0007018; GO:0005876; GO:0005856; GO:0005829; GO:0005813; GO:0005737; GO:0005524; GO:0005515; GO:0003777; GO:0003774; GO:0000922; GO:0000278; GO:0000236; GO:0000166; GO:0000087
chr8:38089470-38096610	DDHD2	NM_015214	17.1577	20.1353	0.85212	0.989138			GO:0046872; GO:0016787; GO:0016042; GO:0005813; GO:0005737
chr10:104180050-104182936	FBXL15	NM_024326	73.2612	86.0027	0.851848	0.987079			GO:0031146; GO:0030513; GO:0030282; GO:0019005; GO:0016567; GO:0009953; GO:0005737; GO:0005515; GO:0004842; GO:0000086
chr2:70523107-70528728	FAM136A	NM_032822	189.544	222.554	0.851676	0.975401			GO:0005739; GO:0005737
chr6:170102232-170124106	C6orf120	NM_001029863	14.0909	16.5625	0.850771	0.987948			GO:0005576
chr8:29190645-29208248	DUSP4	NM_001394	201.37	236.733	0.850621	0.967201	ko04010		GO:0051403; GO:0048011; GO:0045087; GO:0034142; GO:0034138; GO:0034134; GO:0034130; GO:0017017; GO:0016787; GO:0010033; GO:0008330; GO:0008063; GO:0006470; GO:0005654; GO:0005634; GO:0005625; GO:0004725; GO:0002756; GO:0002755; GO:0002224; GO:0001706; GO:0000188; GO:0000165
chr17:36921943-36956173	PIP4K2B	NM_003559	61.7371	72.5972	0.850406	0.975144	ko04070; ko00562; ko04810	phosphatidylinositol-5-phosphate 4-kinase, type II, beta	GO:0016740; GO:0016309; GO:0016308; GO:0007166; GO:0005886; GO:0005789; GO:0005783; GO:0005737; GO:0005634; GO:0005524; GO:0005057; GO:0000166
chr8:30535448-30585495	GSR	NM_000637	219.827	258.539	0.850266	0.968354	ko00480		GO:0055086; GO:0050661; GO:0050660; GO:0045454; GO:0043295; GO:0042803; GO:0016491; GO:0015949; GO:0009055; GO:0007283; GO:0006749; GO:0005829; GO:0005739; GO:0005737; GO:0005625; GO:0004362
chr3:182659733-182698351	DCUN1D1	NM_020640	26.671	31.3938	0.849563	0.982422			GO:0008150; GO:0005515; GO:0000151
chr10:123500416-123687546	ATE1	NM_001001976	24.5396	28.885	0.849562	0.982422			GO:0016746; GO:0016740; GO:0016598; GO:0005737; GO:0005634; GO:0004057
chr1:39547109-39952789	MACF1	NM_012090	56.4491	66.4498	0.8495	0.966263			GO:0051893; GO:0051015; GO:0043001; GO:0042995; GO:0042060; GO:0032886; GO:0032587; GO:0030177; GO:0016887; GO:0015629; GO:0010632; GO:0008150; GO:0008017; GO:0007163; GO:0007050; GO:0006928; GO:0006620; GO:0006200; GO:0005886; GO:0005874; GO:0005856; GO:0005794; GO:0005737; GO:0005515; GO:0005509; GO:0003779; GO:0001707
chr15:72491369-72523684	PKM2	NM_182470	6233.35	7341.98	0.849001	0.980056	ko00230; ko00010; ko04930; ko00620; ko00710		GO:0030955; GO:0016740; GO:0012501; GO:0006096; GO:0006006; GO:0005975; GO:0005886; GO:0005829; GO:0005737; GO:0005634; GO:0005524; GO:0005515; GO:0004743; GO:0000287; GO:0000166
chr1:229406744-229441260	RAB4A	NM_004578	68.5285	80.7172	0.848995	0.979854	ko04144		GO:0055037; GO:0051117; GO:0035255; GO:0032593; GO:0030100; GO:0019905; GO:0019003; GO:0008565; GO:0007264; GO:0006184; GO:0005886; GO:0005829; GO:0005792; GO:0005737; GO:0005626; GO:0005625; GO:0005525; GO:0005515; GO:0003924; GO:0001671; GO:0000166
chr2:27422454-27435175	SLC5A6	NM_021095	115.639	136.33	0.848229	0.972087			GO:0055085; GO:0031526; GO:0015939; GO:0015887; GO:0015878; GO:0015293; GO:0012506; GO:0008523; GO:0006814; GO:0006811; GO:0006810; GO:0006768; GO:0006767; GO:0006766; GO:0005887; GO:0005886; GO:0005624; GO:0005215
chr6:42896859-42907644	CNPY3	NM_006586	142.528	168.273	0.847005	0.975734		canopy 3 homolog (zebrafish)	GO:0045087; GO:0005783; GO:0005102
chr21:27252860-27543138	APP	NM_000484	906.254	1070.77	0.846357	0.966211	ko05010		GO:0051563; GO:0051425; GO:0051402; GO:0051233; GO:0051124; GO:0050885; GO:0050803; GO:0048669; GO:0048471; GO:0046872; GO:0045944; GO:0045931; GO:0045665; GO:0045202; GO:0045177; GO:0045087; GO:0043231; GO:0043198; GO:0043197; GO:0042802; GO:0040014; GO:0035253; GO:0035235; GO:0033130; GO:0031594; GO:0031410; GO:0031175; GO:0031093; GO:0030900; GO:0030424; GO:0030414; GO:0030198; GO:0030168; GO:…
chr20:44462445-44486040	ACOT8	NM_005469	51.5122	60.871	0.846252	0.982422	ko04146		GO:0047617; GO:0044419; GO:0044255; GO:0033882; GO:0033540; GO:0016787; GO:0008206; GO:0007031; GO:0006699; GO:0006637; GO:0006629; GO:0005782; GO:0005777; GO:0005739; GO:0005515; GO:0004091
chr9:130213764-130265780	LRSAM1	NM_001005373	60.7993	71.8566	0.84612	0.978773			GO:0070086; GO:0051865; GO:0046872; GO:0046755; GO:0045806; GO:0044425; GO:0030163; GO:0016874; GO:0015031; GO:0008270; GO:0005737; GO:0005576; GO:0005515; GO:0005179; GO:0004842; GO:0000209
chrX:153712055-153715007	UBL4A	NM_014235	117.278	138.626	0.846003	0.976652		ubiquitin-like 4A	GO:0071818; GO:0071816; GO:0019787; GO:0006810; GO:0006464; GO:0005829; GO:0005737
chr19:2100992-2151601	AP3D1	NM_001077523	281.326	332.729	0.845511	0.964634	ko04142		GO:0061088; GO:0051138; GO:0048499; GO:0048007; GO:0033365; GO:0030117; GO:0019882; GO:0016192; GO:0016020; GO:0010008; GO:0008565; GO:0006886; GO:0006726; GO:0005794; GO:0005737; GO:0005488; GO:0005215; GO:0000139
chr19:40728114-40730922	CNTD2	NM_024877	24.5533	29.0524	0.845138	0.987407
chr4:56719815-56771244	EXOC1	NM_001024924	31.8567	37.7159	0.844649	0.982087			GO:0015031; GO:0006887; GO:0005886; GO:0000145
chr10:115438934-115490664	CASP7	NM_033338	14.8487	17.5812	0.844578	0.988914	ko05010; ko04210		GO:0043525; GO:0031966; GO:0016485; GO:0009411; GO:0008635; GO:0008629; GO:0008234; GO:0008233; GO:0007568; GO:0007507; GO:0006921; GO:0006917; GO:0006915; GO:0006508; GO:0005829; GO:0005792; GO:0005789; GO:0005737; GO:0005654; GO:0005625; GO:0005515; GO:0004197; GO:0004190; GO:0001836
chr2:74682198-74688010	INO80B	NM_031288	116.664	138.173	0.844333	0.969614			GO:0046872; GO:0031011; GO:0006355; GO:0006310; GO:0006281; GO:0005886; GO:0005737; GO:0005730; GO:0005634; GO:0005515
chr12:65004166-65091306	RASSF3	NM_178169	74.1535	87.857	0.844025	0.976652			GO:0042802; GO:0007165; GO:0005886; GO:0005874; GO:0005856; GO:0005737; GO:0005515
chr2:53994903-53995156	CHAC2	NM_001008708	228.23	270.468	0.843834	0.989566		ChaC, cation transport regulator homolog 2 (E. coli)	GO:0008150; GO:0005575; GO:0003674
chr19:41244912-41256413	C19orf54	NM_198476	35.4067	41.9729	0.843561	0.978773
chr17:60501245-60527906	METTL2A	NM_181725	62.011	73.519	0.843469	0.977825			GO:0016740; GO:0008168
chr11:45950869-46142993	PHF21A	NM_001101802	30.0067	35.6074	0.84271	0.977674		PHD finger protein 21A	GO:0046872; GO:0016568; GO:0008270; GO:0007596; GO:0006355; GO:0005654; GO:0005634; GO:0003682; GO:0003677; GO:0001967; GO:0000122; GO:0000118
chr15:72577067-72598656	BRUNOL6	NM_052840	4.41601	5.24818	0.841436	0.989566			GO:0006397; GO:0005737; GO:0005634; GO:0003723; GO:0000381; GO:0000166
chr6:118812593-119031238	C6orf204	NM_001178035	5.11051	6.07356	0.841436	0.990322			GO:0005856; GO:0005813; GO:0005737
chr5:98109345-98132198	RGMB	NM_001012761	22.7342	27.0519	0.840392	0.980889			GO:0046658; GO:0045893; GO:0045121; GO:0042802; GO:0030509; GO:0007411; GO:0007165; GO:0007155; GO:0005886; GO:0005793
chr20:49625743-49639675	KCNG1	NM_002237	42.1066	50.1199	0.840117	0.983756		potassium voltage-gated channel, subfamily G, member 1	GO:0071805; GO:0055085; GO:0043231; GO:0016021; GO:0016020; GO:0008076; GO:0007268; GO:0006813; GO:0006811; GO:0005886; GO:0005267; GO:0005249; GO:0005244
chr9:35749276-35757897	RGP1	NM_001080496	55.7422	66.3637	0.83995	0.969736
chr6:27219311-27224399	PRSS16	NM_005865	18.4203	21.9362	0.839722	0.985399			GO:0030163; GO:0016023; GO:0008236; GO:0008233; GO:0006508; GO:0005768; GO:0005764
chr11:72975569-73009664	P2RY6	NM_176796	3.22322e-05	3.84246e-05	0.838843	1	ko04080		GO:0045028; GO:0007200; GO:0005887; GO:0005886; GO:0004930; GO:0004872; GO:0004871
chr7:107220357-107263780	BCAP29	NM_018844	15.7632	18.798	0.838557	0.980056			GO:0016192; GO:0016021; GO:0016020; GO:0006915; GO:0006886; GO:0005789; GO:0005783
chr1:160246598-160254941	PEX19	NM_002857	60.6234	72.3217	0.838246	0.976652	ko04146		GO:0072321; GO:0055085; GO:0047485; GO:0045046; GO:0031526; GO:0016557; GO:0016021; GO:0016020; GO:0007031; GO:0006625; GO:0005829; GO:0005778; GO:0005777; GO:0005737; GO:0005634; GO:0005515
chr4:40425271-40631883	RBM47	NM_001098634	14.2277	16.9764	0.838087	0.983413			GO:0005634; GO:0003723; GO:0000166
chr11:126081618-126138877	FAM118B	NM_024556	30.0983	35.9187	0.837956	0.981141
chr16:3272324-3285457	ZNF200	NM_003454	13.0023	15.5221	0.837664	0.983756			GO:0046872; GO:0008270; GO:0008150; GO:0006355; GO:0005634; GO:0005622; GO:0003676; GO:0003674
chr5:140044383-140053914	WDR55	NM_017706	79.233	94.5908	0.83764	0.965448		WD repeat domain 55	GO:0008150; GO:0006364; GO:0005737; GO:0005730; GO:0005634; GO:0005575; GO:0003674
chr21:42647292-42648652	BACE2	NM_012105	60.2881	72.064	0.836591	0.982422	ko05010		GO:0042985; GO:0016486; GO:0016021; GO:0016020; GO:0009986; GO:0008233; GO:0006509; GO:0006508; GO:0005794; GO:0005783; GO:0005768; GO:0004190
chr2:72403113-73053177	EXOC6B	NM_015189	39.54	47.2848	0.83621	0.975102		exocyst complex component 6B	GO:0015031; GO:0006904; GO:0000145
chr17:73401569-73401811	GRB2	NM_002086	1447.11	1733.06	0.835003	0.981141	ko05215; ko04664; ko04010; ko04540; ko04320; ko05214; ko04662; ko05200; ko04062; ko05213; ko04650; ko04910; ko04722; ko04660; ko04510; ko04012; ko04013; ko04912; ko05160; ko05211; ko05221; ko05223; ko04630; ko05220	growth factor receptor-bound protein 2	GO:2000379; GO:0071479; GO:0060670; GO:0051291; GO:0051219; GO:0050900; GO:0048646; GO:0048011; GO:0046875; GO:0044419; GO:0043560; GO:0043408; GO:0043234; GO:0042770; GO:0042059; GO:0034329; GO:0031623; GO:0031295; GO:0030154; GO:0019904; GO:0016020; GO:0012506; GO:0008543; GO:0008286; GO:0007596; GO:0007568; GO:0007411; GO:0007267; GO:0007265; GO:0007173; GO:0005829; GO:0005794; GO:0005768; GO:…
chr10:38383263-38412596	ZNF37A	NM_001007094	20.3538	24.3912	0.834473	0.977825			GO:0046872; GO:0008270; GO:0006355; GO:0005634; GO:0005622; GO:0003700; GO:0003677
chr1:151170988-151222007	PIP5K1A	NM_001135638	129.916	155.724	0.834271	0.964634	ko04070; ko00562; ko04144; ko04810; ko04666		GO:0097178; GO:0060326; GO:0048041; GO:0032863; GO:0032587; GO:0031532; GO:0030027; GO:0019900; GO:0016740; GO:0016607; GO:0016477; GO:0016310; GO:0016308; GO:0010761; GO:0008654; GO:0007165; GO:0006650; GO:0005886; GO:0005847; GO:0005737; GO:0005730; GO:0005634; GO:0005524; GO:0005515; GO:0000166
chrX:41192650-41209527	DDX3X	NM_001356	247.99	297.411	0.833829	0.959866	ko04622		GO:0044419; GO:0016787; GO:0016607; GO:0005737; GO:0005634; GO:0005524; GO:0004386; GO:0004004; GO:0003723; GO:0003677; GO:0000166
chr16:28353837-28367922	LOC728741	XM_003118718	11.9319	14.3184	0.833326	0.989393
chr12:104343979-104351035	C12orf73	NM_001135570	39.8068	47.8004	0.832771	0.980889			GO:0005576
chr3:183976072-183979355	CAMK2N2	NM_033259	40.3599	48.5133	0.831935	0.980056			GO:0005829; GO:0005737; GO:0005634; GO:0004860
chr12:49976657-49999433	FAM186B	NM_032130	1.97033	2.36851	0.831886	1			GO:0043234
chr1:148558187-148596267	NBPF15	NM_001170755	107.758	129.665	0.831049	0.962949			GO:0005737
chr15:73925463-73925778	NPTN	NM_012428	584.082	703.343	0.830437	0.980889			GO:0060291; GO:0050839; GO:0048170; GO:0045743; GO:0042734; GO:0016021; GO:0010976; GO:0007399; GO:0007204; GO:0007156; GO:0007155; GO:0005886; GO:0005105; GO:0001934
chr17:62774256-62778117	LOC146880	NR_026899	10.1895	12.274	0.830169	0.984406
chr17:62494370-62502484	DDX5	NM_004396	200.971	242.202	0.829766	0.958832	ko03040		GO:0071013; GO:0036002; GO:0030529; GO:0016818; GO:0016787; GO:0016049; GO:0008380; GO:0008026; GO:0005730; GO:0005634; GO:0005524; GO:0005515; GO:0003724; GO:0003712; GO:0000398; GO:0000381; GO:0000166
chr10:103866265-103880341	LDB1	NM_001113407	109.914	132.906	0.827006	0.965448			GO:0060322; GO:0046985; GO:0045944; GO:0045892; GO:0045785; GO:0045647; GO:0043973; GO:0043621; GO:0043234; GO:0042803; GO:0035019; GO:0032784; GO:0030274; GO:0030182; GO:0022607; GO:0021702; GO:0021549; GO:0019899; GO:0016055; GO:0010669; GO:0009948; GO:0007275; GO:0006355; GO:0006351; GO:0005911; GO:0005667; GO:0005634; GO:0003714; GO:0003682; GO:0003677; GO:0001942; GO:0001702; GO:0001158; GO:…
chr17:7788091-7816075	CHD3	NM_001005271	24.5322	29.6876	0.826345	0.973105			GO:0051297; GO:0046872; GO:0016818; GO:0016787; GO:0016581; GO:0016568; GO:0008270; GO:0007051; GO:0006357; GO:0006355; GO:0005856; GO:0005813; GO:0005737; GO:0005634; GO:0005524; GO:0005515; GO:0004386; GO:0004003; GO:0003677; GO:0000166
chr15:91427664-91439006	FES	NM_002005	40.1105	48.5718	0.825798	0.978773	ko04360		GO:2000251; GO:2000145; GO:0060627; GO:0046777; GO:0045639; GO:0045595; GO:0043304; GO:0042127; GO:0035091; GO:0034987; GO:0031410; GO:0031234; GO:0031116; GO:0030155; GO:0030054; GO:0018108; GO:0016023; GO:0015630; GO:0010976; GO:0008360; GO:0008289; GO:0008283; GO:0007411; GO:0007275; GO:0006468; GO:0005925; GO:0005886; GO:0005829; GO:0005794; GO:0005737; GO:0005524; GO:0004715; GO:0004713; GO:…
chr7:5253899-5273486	WIPI2	NM_015610	100.516	121.728	0.825743	0.96202			GO:0080025; GO:0070772; GO:0043234; GO:0034045; GO:0032266; GO:0006914; GO:0005829; GO:0005776; GO:0005737; GO:0005730; GO:0005634; GO:0000046; GO:0000045
chr1:41975534-42384548	HIVEP3	NM_024503	5.51338	6.6769	0.825739	0.982397			GO:0046872; GO:0045893; GO:0008270; GO:0005737; GO:0005634; GO:0005622; GO:0003677
chr9:135468479-135545788	DDX31	NM_022779	50.1749	60.8085	0.82513	0.969736			GO:0016787; GO:0008026; GO:0005730; GO:0005634; GO:0005524; GO:0004386; GO:0003723; GO:0000166
chr12:56618114-56623638	OBFC2B	NM_024068	146.075	177.142	0.824621	0.968354			GO:0070876; GO:0031576; GO:0010212; GO:0006974; GO:0006281; GO:0005730; GO:0005634; GO:0005515; GO:0003697; GO:0003677; GO:0000724
chr11:46417963-46612981	AMBRA1	NM_017749	54.0328	65.5278	0.824578	0.965626			GO:0031410; GO:0030154; GO:0007399; GO:0007275; GO:0006914; GO:0005776; GO:0005737
chr1:155629232-155659031	YY1AP1	NM_139119	132.32	160.513	0.824357	0.96202		YY1 associated protein 1	GO:0051726; GO:0006355; GO:0005737; GO:0005730; GO:0005634; GO:0005515
chr9:130697373-130700763	DPM2	NM_003863	202.406	246.015	0.822738	0.958832	ko00563; ko00510		GO:0044267; GO:0043687; GO:0035269; GO:0033185; GO:0031647; GO:0030176; GO:0018279; GO:0016254; GO:0016021; GO:0016020; GO:0009059; GO:0006506; GO:0006501; GO:0006488; GO:0005789; GO:0005783; GO:0005515; GO:0004582; GO:0000506
chrX:15800605-15800900	CA5B	NM_007220	36.7397	44.6555	0.822736	0.991719	ko00910		GO:0046872; GO:0016829; GO:0008270; GO:0008152; GO:0006730; GO:0005739; GO:0004089
chr9:130493802-130497617	TOR2A	NM_001085347	36.1909	43.9885	0.822735	0.979854			GO:0051085; GO:0017111; GO:0005783; GO:0005576; GO:0005524; GO:0005179; GO:0000166
chr1:161087597-161092408	NIT1	NM_005600	131.407	159.72	0.822734	0.96202			GO:0016810; GO:0008150; GO:0006807; GO:0005739; GO:0005737; GO:0000257
chr6:143815126-143833020	FUCA2	NM_032020	162.63	197.84	0.822028	0.958832	ko00511		GO:0043169; GO:0016798; GO:0006004; GO:0005975; GO:0005576; GO:0004560; GO:0003824
chr2:158114066-158168723	GALNT5	NM_014568	70.6879	86.0796	0.821192	0.964634	ko00512		GO:0016757; GO:0016021; GO:0016020; GO:0006024; GO:0005794; GO:0005575; GO:0005529; GO:0004653; GO:0000139
chr5:139027905-139063464	CXXC5	NM_016463	100.135	121.977	0.820933	0.966211			GO:0046872; GO:0043123; GO:0008270; GO:0007165; GO:0005737; GO:0005634; GO:0004871; GO:0003677
chr15:31196054-31283825	MTMR15	NM_014967	24.0728	29.3428	0.820399	0.977803			GO:0043130; GO:0033683; GO:0017108; GO:0008409; GO:0006289; GO:0006281; GO:0005634; GO:0005515; GO:0004528; GO:0004519; GO:0003677; GO:0000724; GO:0000287
chr16:67204404-67217883	NOL3	NM_001185058	100.667	122.804	0.819737	0.971897			GO:0042981; GO:0042802; GO:0016528; GO:0008380; GO:0006916; GO:0006397; GO:0005829; GO:0005739; GO:0005737; GO:0005730; GO:0005634; GO:0005622; GO:0005515; GO:0003723; GO:0001666
chr3:49133364-49142190	QARS	NM_005051	413.752	505.131	0.819098	0.950171	ko00970		GO:0016874; GO:0010467; GO:0006425; GO:0006418; GO:0005829; GO:0005759; GO:0005737; GO:0005524; GO:0004819; GO:0000166
chr12:6561117-6572707	TAPBPL	NM_018009	13.2102	16.1311	0.818927	0.98169			GO:0019885; GO:0016021; GO:0005886; GO:0005792; GO:0005789; GO:0005783
chr14:53503457-53620047	DDHD1	NM_001160148	13.6669	16.7045	0.818157	0.969736			GO:0046872; GO:0016787; GO:0016042; GO:0005737
chr17:40341033-40346550	GHDC	NM_001142623	38.4886	47.0647	0.817781	0.977825			GO:0008150; GO:0005783; GO:0005635; GO:0005634; GO:0005575; GO:0003674
chrX:47064246-47074527	UBA1	NM_003334	627.041	766.825	0.817711	0.948548	ko04120; ko05012		GO:0016874; GO:0008641; GO:0008219; GO:0006464; GO:0005524; GO:0005515; GO:0000166
chr2:96915171-96931751	TMEM127	NM_017849	61.3607	75.3122	0.814751	0.961247			GO:0032007; GO:0016021; GO:0008285; GO:0005886; GO:0005737; GO:0003674
chr11:47430045-47438051	SLC39A13	NM_001128225	39.0961	48.0094	0.814343	0.977825			GO:0071577; GO:0055085; GO:0048471; GO:0046873; GO:0042803; GO:0030173; GO:0016021; GO:0016020; GO:0006882; GO:0006811; GO:0005794; GO:0005385
chr1:171669295-171711379	VAMP4	NR_033704	6.37945	7.83556	0.814166	0.984864	ko04130		GO:0016192; GO:0016021; GO:0016020; GO:0005794; GO:0005768; GO:0005764; GO:0000139
chr5:68665123-68710628	RAD17	NM_133338	28.1212	34.5731	0.813384	0.977825	ko04113; ko04111		GO:0042325; GO:0017111; GO:0008156; GO:0007093; GO:0007049; GO:0006974; GO:0006281; GO:0006260; GO:0005730; GO:0005654; GO:0005634; GO:0005524; GO:0005515; GO:0000781; GO:0000166; GO:0000077; GO:0000076; GO:0000075
chr2:74699108-74710357	CCDC142	NM_032779	37.8162	46.5286	0.812752	0.967359
chr5:132157832-132166590	SHROOM1	NM_001172700	13.2116	16.257	0.812671	0.979854			GO:0051017; GO:0051015; GO:0016460; GO:0005874; GO:0005856; GO:0005737; GO:0000902
chr3:47542869-47555199	C3orf75	NM_001031703	110.578	136.074	0.812631	0.977825			GO:0008150; GO:0005575; GO:0003674
chr16:70284133-70323438	AARS	NM_001605	261.479	321.789	0.812579	0.943782	ko00970	alanyl-tRNA synthetase	GO:0050885; GO:0046872; GO:0043588; GO:0043524; GO:0043200; GO:0030968; GO:0021680; GO:0016874; GO:0016597; GO:0010467; GO:0008033; GO:0006457; GO:0006419; GO:0006418; GO:0006400; GO:0005829; GO:0005737; GO:0005625; GO:0005524; GO:0004813; GO:0002161; GO:0001942; GO:0000166; GO:0000049
chr19:19039957-19052084	HOMER3	NM_001145722	89.1688	109.786	0.812206	0.971916			GO:0045211; GO:0045202; GO:0030054; GO:0019904; GO:0014069; GO:0008022; GO:0007216; GO:0006605; GO:0005886; GO:0005737; GO:0005575; GO:0005515
chr15:91473409-91497323	UNC45A	NM_001039675	173.067	213.137	0.811999	0.947795			GO:0048471; GO:0030154; GO:0007517; GO:0007275; GO:0005737; GO:0005634; GO:0005488
chr8:144451013-144466390	RHPN1	NM_052924	11.7906	14.5216	0.811935	0.982422		rhophilin, Rho GTPase binding protein 1	GO:0007165; GO:0005622
chr3:51428652-51534018	VPRBP	NM_001171904	49.0162	60.4879	0.810347	0.979854			GO:0044419; GO:0008180; GO:0005737; GO:0005634; GO:0005515
chr17:80197563-80202709	CSNK1D	NM_001893	107.709	133.145	0.80896	0.948548	ko04540; ko04710; ko04340		GO:0090263; GO:0051225; GO:0050321; GO:0048511; GO:0048471; GO:0042752; GO:0032922; GO:0032436; GO:0016055; GO:0007165; GO:0006468; GO:0006281; GO:0005886; GO:0005876; GO:0005856; GO:0005829; GO:0005819; GO:0005813; GO:0005794; GO:0005737; GO:0005634; GO:0005524; GO:0005515; GO:0004674; GO:0004672; GO:0001934; GO:0000278; GO:0000166; GO:0000086
chr17:1419749-1423834	LOC100306951	NR_028514	153.587	189.927	0.808663	0.949498
chr2:28113481-28561768	BRE	NM_199193	63.1659	78.1927	0.807823	0.971916			GO:0070552; GO:0070531; GO:0045768; GO:0045739; GO:0031593; GO:0031572; GO:0016568; GO:0010212; GO:0007165; GO:0006974; GO:0006915; GO:0006302; GO:0005737; GO:0005634; GO:0005515; GO:0005164; GO:0000268; GO:0000152
chr8:27168998-27316903	PTK2B	NM_173174	15.5026	19.2121	0.806919	0.977803	ko04912; ko04062; ko04670; ko04650; ko04020		GO:2000538; GO:2000379; GO:2000249; GO:2000114; GO:2000058; GO:0071300; GO:0070374; GO:0070098; GO:0051592; GO:0051591; GO:0051279; GO:0050731; GO:0048471; GO:0048041; GO:0048010; GO:0046777; GO:0046330; GO:0045860; GO:0045768; GO:0045727; GO:0045638; GO:0045471; GO:0045453; GO:0045121; GO:0043552; GO:0043534; GO:0043507; GO:0043423; GO:0043267; GO:0043149; GO:0043066; GO:0042976; GO:0042542; GO:…
chr1:6280149-6296062	ICMT	NM_012405	103.255	127.99	0.806743	0.944343			GO:0046578; GO:0046499; GO:0046498; GO:0035264; GO:0016740; GO:0016021; GO:0016020; GO:0008284; GO:0008168; GO:0008140; GO:0008104; GO:0006612; GO:0006481; GO:0006464; GO:0005789; GO:0005783; GO:0005624; GO:0004671; GO:0003880; GO:0001889; GO:0001701
chr6:90341851-90348474	LYRM2	NM_020466	19.9401	24.7347	0.806159	0.974083			GO:0005739
chr2:61404554-61416241	AHSA2	NM_152392	47.3507	58.7604	0.805827	0.96202			GO:0051087; GO:0006950; GO:0005737; GO:0001671
chr19:1286167-1325068	EFNA2	NM_001405	24.1602	29.9891	0.805633	0.97903	ko04360		GO:0048013; GO:0046875; GO:0046849; GO:0043204; GO:0031594; GO:0031225; GO:0030316; GO:0021772; GO:0007411; GO:0007267; GO:0005886
chr3:195425559-195427041	MIR570	NR_030296	16.327	20.267	0.805595	0.982422
chr20:61583998-61599949	SLC17A9	NM_022082	20.2556	25.1601	0.805068	0.979854		solute carrier family 17, member 9	GO:0055085; GO:0016021; GO:0016020; GO:0006887; GO:0005215
chr7:76139744-76157200	UPK3B	NM_182684	6.43913	8.00435	0.804454	0.989138			GO:0016021; GO:0010629; GO:0005886
chr7:87257728-87461613	RUNDC3B	NM_138290	2.96188	3.68643	0.803455	1
chr12:49932802-49952876	KCNH3	NM_012284	100.782	125.511	0.802973	0.945532			GO:0055085; GO:0016021; GO:0007268; GO:0006813; GO:0006811; GO:0006355; GO:0005886; GO:0005249; GO:0005244; GO:0000155
chr6:74405507-74538041	CD109	NM_133493	48.8634	60.861	0.802869	0.947101			GO:0031225; GO:0005886; GO:0005615; GO:0005576; GO:0004867
chr3:129822685-129830303	LOC729375	NR_024252	32.3189	40.2867	0.802223	0.982422
chr1:93913637-94020218	FNBP1L	NM_001164473	44.6569	55.6681	0.802199	0.959467			GO:0016023; GO:0008289; GO:0006897; GO:0005938; GO:0005886; GO:0005856; GO:0005737
chrX:154718671-154842622	TMLHE	NM_018196	13.1201	16.3558	0.802168	0.977825	ko00310		GO:0051354; GO:0050353; GO:0046872; GO:0045329; GO:0034641; GO:0031418; GO:0016702; GO:0016491; GO:0005759; GO:0005739; GO:0005506
chr11:129939715-130014706	APLP2	NM_001642	251.748	314.294	0.800995	0.938808			GO:0050885; GO:0042802; GO:0030901; GO:0030900; GO:0030414; GO:0030198; GO:0016021; GO:0009790; GO:0007626; GO:0007617; GO:0007186; GO:0007176; GO:0006878; GO:0005886; GO:0005634; GO:0005515; GO:0004867; GO:0003677; GO:0001967
chr3:190231839-190374986	IL1RAP	NM_001167928	2.37364	2.96748	0.799884	1	ko04060; ko04210		GO:0045087; GO:0007165; GO:0006955; GO:0006954; GO:0006461; GO:0005887; GO:0005886; GO:0005622; GO:0005576; GO:0004908; GO:0004888; GO:0004872; GO:0004871
chr15:81489218-81605104	IL16	NM_001172128	0.383032	0.47886	0.799883	1			GO:0050930; GO:0044419; GO:0030595; GO:0006955; GO:0006935; GO:0006355; GO:0005886; GO:0005737; GO:0005634; GO:0005622; GO:0005615; GO:0005576; GO:0005125
chrX:54947248-54957864	TRO	NM_001039705	1.40635	1.7582	0.799881	1			GO:0030308; GO:0007566; GO:0007156; GO:0007155; GO:0005887; GO:0005886; GO:0005737; GO:0005634
chr3:158519714-158547508	MFSD1	NM_022736	41.034	51.3286	0.799437	0.972006			GO:0055085; GO:0016021; GO:0016020
chr17:55938819-55980750	CUEDC1	NM_017949	12.0855	15.1212	0.799242	0.982422
chr8:77892493-77913280	PEX2	NM_001172086	36.1949	45.2948	0.799096	0.964777	ko04146		GO:0050680; GO:0048147; GO:0046872; GO:0045540; GO:0042632; GO:0031648; GO:0016593; GO:0016021; GO:0016020; GO:0008270; GO:0007399; GO:0007031; GO:0006699; GO:0005779; GO:0005778; GO:0005777; GO:0005624; GO:0005515; GO:0001764; GO:0000122
chr19:38187263-38210691	ZNF607	NM_032689	32.4914	40.7389	0.797552	0.965448			GO:0046872; GO:0008270; GO:0006355; GO:0005634; GO:0005622; GO:0003677
chr1:149822627-149823161	HIST2H2AA4	NM_001040874	175.678	220.375	0.797178	0.976652	ko05322	histone cluster 2, H2aa4	GO:0006334; GO:0005694; GO:0005634; GO:0003677; GO:0000786
chr2:10442987-10567743	HPCAL1	NM_134421	212.153	266.448	0.796227	0.944431			GO:0005509
chr16:72152995-72206349	PMFBP1	NM_001160213	3.12587	3.926	0.796197	1			GO:0005737
chr21:9907193-9968585	LOC100132288	NM_001033515	42.446	53.311	0.796196	0.971374
chr22:38686696-38714089	CSNK1E	NM_152221	33.2464	41.7792	0.795764	0.977825	ko04310; ko04710; ko04340		GO:0090263; GO:0034613; GO:0032436; GO:0030178; GO:0007165; GO:0006468; GO:0006281; GO:0005829; GO:0005737; GO:0005634; GO:0005524; GO:0005515; GO:0004674; GO:0004672; GO:0000278; GO:0000166; GO:0000086
chr9:112403067-112934792	PALM2-AKAP2	NM_007203	60.3422	75.8661	0.795378	0.943251
chr8:41435706-41467922	AGPAT6	NM_178819	92.2267	116.054	0.794688	0.96202	ko00561; ko00564		GO:0046339; GO:0044255; GO:0040014; GO:0019432; GO:0016746; GO:0016021; GO:0016020; GO:0008654; GO:0008610; GO:0008152; GO:0007595; GO:0006656; GO:0006637; GO:0006631; GO:0005789; GO:0005783; GO:0005624; GO:0004366; GO:0003841; GO:0002071
chr10:43689983-43699312	RASGEF1A	NM_145313	46.5659	58.6599	0.793828	0.962949		RasGEF domain family, member 1A	GO:0051056; GO:0016477; GO:0005622; GO:0005088
chr11:58974032-58975324	DTX4	NM_015177	11.0152	13.8843	0.793357	0.98369	ko04330	deltex homolog 4 (Drosophila)	GO:0046872; GO:0008270; GO:0007219; GO:0005737
chr10:89727707-89728494	PTEN	NM_000314	61.6004	77.6456	0.793353	0.977825	ko00562; ko05215; ko04530; ko05214; ko05218; ko04070; ko05200; ko05222; ko05213; ko04115; ko04510	phosphatase and tensin homolog	GO:2000134; GO:2000060; GO:0090344; GO:0060736; GO:0060070; GO:0051898; GO:0051895; GO:0051800; GO:0051717; GO:0051091; GO:0050852; GO:0050821; GO:0050680; GO:0048738; GO:0048015; GO:0048011; GO:0046856; GO:0046855; GO:0043542; GO:0043491; GO:0043220; GO:0043066; GO:0042995; GO:0035749; GO:0035335; GO:0033032; GO:0031658; GO:0031647; GO:0030336; GO:0030165; GO:0019899; GO:0016787; GO:0016605; GO:…
chr22:40766594-41032712	SGSM3	NM_015705	64.6505	81.5146	0.793116	0.950617			GO:0045732; GO:0032486; GO:0032483; GO:0017137; GO:0007050; GO:0007049; GO:0005921; GO:0005737; GO:0005622; GO:0005515; GO:0005097
chr16:29882479-29910899	SEZ6L2	NM_012410	45.1905	57.0125	0.792642	0.96449			GO:0016021; GO:0005886; GO:0005789; GO:0005783
chr3:47269515-47324337	KIF9	NM_001134878	20.937	26.4255	0.792303	0.972619			GO:0007596; GO:0007018; GO:0005874; GO:0005856; GO:0005737; GO:0005524; GO:0003777; GO:0000166
chr12:100556347-100567335	GOLGA2L1	NR_024261	9.37501	11.8332	0.792263	0.976652
chr12:68688344-68726170	MDM1	NM_017440	6.56751	8.29061	0.792162	0.979714			GO:0060041; GO:0005634
chr4:141178439-141303710	SCOC	NM_032547	47.9578	60.5449	0.792103	0.969736			GO:0005794; GO:0005634; GO:0005515
chr6:116756532-116758688	DSE	NM_001080976	52.558	66.3708	0.791884	0.967359	ko00532	dermatan sulfate epimerase	GO:0047757; GO:0030208; GO:0016853; GO:0016021; GO:0016020; GO:0005794; GO:0005783
chr12:7013896-7023406	LRRC23	NM_001135217	17.1019	21.618	0.791095	0.979854			GO:0008150; GO:0005575; GO:0003674
chr4:184239219-184241927	CLDN22	NM_001111319	1.77395	2.24241	0.791091	1	ko05160; ko04670; ko04530; ko04514		GO:0070830; GO:0045216; GO:0042802; GO:0034329; GO:0030054; GO:0016338; GO:0016021; GO:0005923; GO:0005886; GO:0005198
chr17:25799035-25953429	KSR1	NM_014238	13.9061	17.5968	0.790263	0.967727			GO:0046872; GO:0035556; GO:0016772; GO:0016020; GO:0007265; GO:0006468; GO:0005789; GO:0005783; GO:0005737; GO:0005622; GO:0005524; GO:0005515; GO:0004674; GO:0004672
chr3:170779301-171178272	TNIK	NM_001161561	0.00222505	0.00281579	0.790205	1			GO:0055037; GO:0048814; GO:0046777; GO:0031532; GO:0016055; GO:0007399; GO:0007256; GO:0007243; GO:0007010; GO:0006950; GO:0006468; GO:0005856; GO:0005737; GO:0005730; GO:0005634; GO:0005524; GO:0005515; GO:0005083; GO:0004674; GO:0000166
chr9:35406751-35451112	LOC158381	NR_003581	20.3469	25.7573	0.789947	0.976652		ATPase, class I, type 8B, member 5, pseudogene
chr19:39369194-39390502	SIRT2	NM_012237	51.1147	64.7111	0.789891	0.968354			GO:0070403; GO:0051775; GO:0051301; GO:0046872; GO:0045892; GO:0045843; GO:0043161; GO:0043130; GO:0042903; GO:0042826; GO:0042325; GO:0035035; GO:0033558; GO:0017136; GO:0016787; GO:0016575; GO:0016458; GO:0008270; GO:0008134; GO:0007096; GO:0007067; GO:0007049; GO:0006476; GO:0006471; GO:0006348; GO:0006342; GO:0005874; GO:0005856; GO:0005737; GO:0005677; GO:0005515; GO:0003950; GO:0000183
chr17:7482804-7486740	CD68	NM_001251	46.0279	58.3139	0.789313	0.96202	ko04142		GO:0016021; GO:0010008; GO:0005886; GO:0005768; GO:0005765; GO:0005624
chr1:65210578-65432248	RAVER2	NM_018211	23.0674	29.2251	0.789301	0.96428			GO:0005737; GO:0005634; GO:0003723; GO:0000166
chr19:52359055-52391409	ZNF577	NR_024181	0.957564	1.21653	0.787127	1			GO:0046872; GO:0008270; GO:0006355; GO:0005634; GO:0005622; GO:0003677
chr2:114379302-114384715	RPL23AP7	NR_024528	129.096	164.023	0.78706	0.969803
chr2:203637872-203736195	ICA1L	NM_138468	4.86134	6.17733	0.786965	0.976652		islet cell autoantigen 1,69kDa-like
chr3:101383700-101384707	ZBTB11	NM_014415	50.2784	63.9317	0.786439	0.976652			GO:0046872; GO:0008270; GO:0008150; GO:0006355; GO:0005730; GO:0005634; GO:0005622; GO:0003677; GO:0003674
chr11:44117746-44266980	EXT2	NM_001178083	78.8046	100.326	0.785485	0.947124	ko00534		GO:0050509; GO:0050508; GO:0046982; GO:0042803; GO:0042328; GO:0033692; GO:0031227; GO:0030154; GO:0016757; GO:0016021; GO:0016020; GO:0015020; GO:0015014; GO:0015012; GO:0008375; GO:0007165; GO:0006024; GO:0005794; GO:0005789; GO:0005783; GO:0001707; GO:0001503; GO:0000139
chr18:47309892-47310291	ACAA2	NM_006111	65.6143	83.5755	0.78509	0.982422	ko00071; ko00062; ko00362; ko00280		GO:0016747; GO:0006916; GO:0006695; GO:0006635; GO:0006631; GO:0006629; GO:0006084; GO:0005743; GO:0005739; GO:0005515; GO:0003988
chr2:130908964-130940323	SMPD4	NM_017951	58.8975	75.0387	0.784895	0.948548	ko00600		GO:0071356; GO:0050290; GO:0046872; GO:0046513; GO:0046475; GO:0016787; GO:0016021; GO:0016020; GO:0006685; GO:0005802; GO:0005794; GO:0005789; GO:0005783; GO:0004767; GO:0000139
chr2:201717731-201729467	CLK1	NM_001162407	29.0155	36.9935	0.78434	0.968354			GO:0046777; GO:0043484; GO:0018108; GO:0018107; GO:0018105; GO:0008283; GO:0005737; GO:0005634; GO:0005524; GO:0004715; GO:0004712; GO:0004674; GO:0000166
chr1:226030934-226070420	TMEM63A	NM_014698	31.8316	40.5873	0.784275	0.951859			GO:0016021; GO:0016020; GO:0005765; GO:0000166
chr5:141971742-142077635	FGF1	NM_001144934	5.40001e-05	6.88556e-05	0.784251	1	ko05200; ko04810; ko04010; ko05218		GO:0051781; GO:0050679; GO:0048155; GO:0045944; GO:0045785; GO:0045766; GO:0045542; GO:0034605; GO:0030335; GO:0030324; GO:0030154; GO:0010740; GO:0009653; GO:0008543; GO:0008286; GO:0008284; GO:0008201; GO:0008083; GO:0007399; GO:0007275; GO:0007165; GO:0005938; GO:0005829; GO:0005737; GO:0005730; GO:0005634; GO:0005615; GO:0005578; GO:0005576; GO:0005515; GO:0005104; GO:0004713; GO:0001934; GO:…
chrX:135067582-135129428	SLC9A6	NM_001177651	18.8868	24.085	0.784173	0.967981	ko04260		GO:0055085; GO:0055038; GO:0031901; GO:0016021; GO:0015385; GO:0015299; GO:0015297; GO:0006885; GO:0006814; GO:0006812; GO:0006811; GO:0006810; GO:0005886; GO:0005792; GO:0005789; GO:0005768; GO:0005739
chr1:222791430-222843328	MIA3	NM_198551	35.6083	45.4388	0.783654	0.936108		melanoma inhibitory activity family, member 3	GO:0042060; GO:0030336; GO:0016021; GO:0016020; GO:0015031; GO:0007162; GO:0006887; GO:0005789; GO:0005783; GO:0005515; GO:0002687
chr17:61554433-61575741	ACE	NM_152830	0.495047	0.631874	0.783458	1	ko05142; ko04614; ko05410		GO:0060218; GO:0060047; GO:0050769; GO:0050729; GO:0050482; GO:0046872; GO:0043171; GO:0043065; GO:0042755; GO:0042447; GO:0042312; GO:0042277; GO:0032943; GO:0032496; GO:0031711; GO:0031667; GO:0031404; GO:0019233; GO:0019229; GO:0016021; GO:0014910; GO:0009897; GO:0008270; GO:0008241; GO:0008237; GO:0008233; GO:0008217; GO:0008144; GO:0006508; GO:0005886; GO:0005768; GO:0005624; GO:0005615; GO:…
chr4:91156181-92523370	FAM190A	NM_001145065	48.3181	61.7332	0.782692	0.990322
chr1:155201025-155214653	GBA	NM_001171811	70.1454	89.771	0.781382	0.935219	ko04142; ko00600; ko00511		GO:0071356; GO:0050728; GO:0046513; GO:0046512; GO:0043407; GO:0043202; GO:0043169; GO:0035307; GO:0032715; GO:0023021; GO:0016798; GO:0016020; GO:0008219; GO:0007040; GO:0006680; GO:0006665; GO:0006629; GO:0005975; GO:0005765; GO:0005102; GO:0004348
chr9:77596841-77643339	C9orf41	NM_152420	28.9945	37.1187	0.781129	0.965448
chr19:39833084-39881776	PAF1	NM_019088	129.472	165.95	0.780187	0.921972			GO:0033523; GO:0016593; GO:0010390; GO:0006355; GO:0005634; GO:0005515
chr5:68575805-68616412	CCDC125	NM_176816	17.225	22.0877	0.779846	0.968028			GO:0045111; GO:0005737
chr16:30205216-30215650	SULT1A3	NM_003166	122.972	157.911	0.778742	0.942191	ko00920
chr16:29465874-29476282	SULT1A4	NM_001017389	124.343	159.672	0.77874	0.942191	ko00920		GO:0051923; GO:0050427; GO:0016740; GO:0009812; GO:0008202; GO:0008146; GO:0006805; GO:0006584; GO:0005829; GO:0005737; GO:0004062
chr3:197398258-197463773	KIAA0226	NM_001145642	21.7005	27.8715	0.778591	0.958832			GO:0045806; GO:0010507; GO:0005794; GO:0005770; GO:0005769; GO:0005764; GO:0005515
chr4:153700984-153833064	ARFIP1	NM_001025595	37.3407	48.0115	0.777745	0.96202			GO:0050708; GO:0006886; GO:0005829; GO:0003674; GO:0000139
chr16:3550918-3587728	CLUAP1	NM_015041	40.4897	52.1132	0.776957	0.96202			GO:0005634; GO:0005515
chr14:68113883-68141602	VTI1B	NM_006370	45.5719	58.6887	0.776502	0.943655	ko04130		GO:0016192; GO:0016021; GO:0016020; GO:0012505; GO:0008283; GO:0006944; GO:0006904; GO:0006886; GO:0005794
chr12:124007427-124018265	RILPL1	NM_178314	30.9031	39.8052	0.776358	0.97441			GO:0043526; GO:0005886; GO:0005829; GO:0005737; GO:0005730; GO:0005634
chr9:100263461-100365206	TMOD1	NM_001166116	18.7859	24.2071	0.776049	0.965893			GO:0030863; GO:0030239; GO:0030049; GO:0030016; GO:0016020; GO:0008180; GO:0005856; GO:0005829; GO:0005737; GO:0005634; GO:0005523; GO:0003779
chr22:51007289-51021428	CHKB-CPT1B	NR_027928	22.8166	29.4508	0.774736	0.963214
chr21:46683842-46707811	POFUT2	NR_004858	24.6659	31.8429	0.774612	0.96202			GO:0046922; GO:0016757; GO:0006004; GO:0005975; GO:0005783
chr10:119799523-119806207	LOC100129413	XR_110460	18.3702	23.7237	0.77434	0.976652
chr16:14802864-14820150	LOC642778	XM_003118692	0.87216	1.1272	0.77374	1
chr16:2787076-2794798	LOC100128788	NR_027274	2.34989	3.03736	0.773662	1
chr1:150969300-150980854	FAM63A	NM_018379	4.0535	5.24709	0.772523	0.98439			GO:0008150; GO:0005575
chr2:201390815-201445454	SGOL2	NM_152524	18.7664	24.2937	0.77248	0.964732			GO:0051754; GO:0051301; GO:0030892; GO:0008104; GO:0007126; GO:0007059; GO:0005829; GO:0005730; GO:0005694; GO:0005634; GO:0005515; GO:0000780; GO:0000777; GO:0000775; GO:0000278; GO:0000236; GO:0000087
chr19:14591043-14591595	GIPC1	NM_005716	432.47	560.278	0.771885	0.953034			GO:0048167; GO:0044445; GO:0043542; GO:0043198; GO:0043197; GO:0042803; GO:0032435; GO:0031647; GO:0030511; GO:0030165; GO:0030139; GO:0017022; GO:0016023; GO:0016020; GO:0014047; GO:0012506; GO:0008021; GO:0007268; GO:0007186; GO:0006605; GO:0005938; GO:0005903; GO:0005829; GO:0005737; GO:0005625; GO:0005624; GO:0005515; GO:0005102; GO:0003779
chr19:47906378-47922788	MEIS3	NM_020160	44.5813	57.7985	0.771323	0.962949			GO:0043565; GO:0005634; GO:0003700
chr6:116381141-116382031	FRK	NM_002031	11.6379	15.0883	0.771319	0.984079			GO:0030154; GO:0008285; GO:0006468; GO:0005886; GO:0005737; GO:0005634; GO:0005622; GO:0005524; GO:0005515; GO:0004715; GO:0000166
chrX:15803838-15805712	INE2	NR_002725	1.59547	2.0685	0.771317	1
chr4:2965342-3042474	GRK4	NM_182982	2.84081	3.68307	0.771316	1	ko04062; ko04144		GO:0050254; GO:0043025; GO:0031623; GO:0030425; GO:0008277; GO:0005938; GO:0005829; GO:0005737; GO:0005524; GO:0004871; GO:0004703; GO:0002031; GO:0000166
chr1:149816130-149817974	LOC100132909	XR_108345	7.31083	9.47839	0.771316	0.980056
chrX:129263336-129299861	AIFM1	NM_001130847	99.0765	128.515	0.770933	0.939755	ko04210		GO:0070059; GO:0051402; GO:0050660; GO:0048471; GO:0045454; GO:0016491; GO:0016020; GO:0009055; GO:0006919; GO:0006309; GO:0005829; GO:0005792; GO:0005758; GO:0005743; GO:0005739; GO:0005737; GO:0005634; GO:0005625; GO:0005515; GO:0003677
chr5:1461541-1479273	LPCAT1	NM_024830	73.6714	95.7388	0.769504	0.928355	ko00564; ko00565		GO:0060041; GO:0047192; GO:0047184; GO:0016746; GO:0016021; GO:0016020; GO:0008654; GO:0008152; GO:0005794; GO:0005789; GO:0005783; GO:0005509; GO:0000139
chr10:70587751-70655209	STOX1	NM_001130161	12.8203	16.6696	0.769083	0.969736			GO:0005737; GO:0005730; GO:0005634; GO:0003677
chr1:894853-901212	KLHL17	NM_198317	38.2318	49.7149	0.769021	0.951291			GO:0051015; GO:0045211; GO:0045202; GO:0043025; GO:0032947; GO:0032839; GO:0031208; GO:0030054; GO:0030036; GO:0015629; GO:0014069; GO:0007420; GO:0005886
chr10:76871392-76941881	SAMD8	NM_001174156	16.6784	21.6884	0.769001	0.958832			GO:0016021; GO:0016020; GO:0006686; GO:0006665; GO:0006629; GO:0003674
chr1:39303950-39325391	RRAGC	NM_022157	30.3324	39.4485	0.768911	0.96449			GO:0071230; GO:0046982; GO:0034613; GO:0032008; GO:0019003; GO:0016049; GO:0008380; GO:0007264; GO:0006915; GO:0006351; GO:0006184; GO:0005764; GO:0005737; GO:0005634; GO:0005525; GO:0005515; GO:0003924; GO:0000287; GO:0000166
chr5:139937827-139944437	APBB3	NM_006051	23.2533	30.2584	0.768491	0.965448			GO:0035556; GO:0015629; GO:0005737; GO:0005622; GO:0005515
chrX:131157244-131209971	RP6-213H19.1	NM_016542	40.5633	52.7852	0.76846	0.957873		serine/threonine protein kinase MST4	GO:0042981; GO:0042802; GO:0016020; GO:0006921; GO:0006915; GO:0006468; GO:0005829; GO:0005794; GO:0005737; GO:0005524; GO:0005515; GO:0004674; GO:0004672; GO:0000287; GO:0000166; GO:0000139
chr2:27872980-27887449	SUPT7L	NM_014860	77.5954	100.977	0.768446	0.916675			GO:0051457; GO:0043966; GO:0030914; GO:0006355; GO:0005634; GO:0004402; GO:0003713
chr10:12171639-12238375	SEC61A2	NR_024577	15.8434	20.6198	0.768359	0.973105	ko04145; ko05110; ko04141; ko03060		GO:0043022; GO:0016021; GO:0016020; GO:0015450; GO:0015031; GO:0008150; GO:0005789; GO:0005783; GO:0003674
chr13:49822046-49867622	CDADC1	NM_030911	10.8435	14.1332	0.767236	0.976652			GO:0046872; GO:0016787; GO:0008270
chr17:62780229-62833302	PLEKHM1P	NR_024386	17.3995	22.6837	0.767049	0.965067			GO:0046872; GO:0035556
chr5:76371908-76383387	ZBED3	NM_032367	19.4258	25.382	0.765338	0.968224			GO:0046872; GO:0003677
chrX:102631267-102633001	NGFRAP1	NM_206915	451.045	590.188	0.76424	0.908221	ko04722		GO:0048011; GO:0046872; GO:0043281; GO:0043028; GO:0008625; GO:0008624; GO:0007275; GO:0006915; GO:0005829; GO:0005737; GO:0005634; GO:0005515; GO:0005123
chr2:85766250-85772457	MAT2A	NM_005911	411.949	539.947	0.762943	0.898666	ko00450; ko00270		GO:0051591; GO:0046872; GO:0042493; GO:0032259; GO:0016740; GO:0009725; GO:0009416; GO:0007623; GO:0006805; GO:0006556; GO:0005829; GO:0005524; GO:0004478; GO:0000166
chr22:28245393-28249746	LOC100507669	XR_109756	121.038	158.669	0.762833	0.935034
chr9:116077189-116102620	WDR31	NM_145241	12.118	15.9034	0.761975	1
chr13:50018381-50069164	SETDB2	NM_031915	4.40527	5.78277	0.761792	0.97171	ko00310		GO:0070986; GO:0051567; GO:0051301; GO:0046974; GO:0046872; GO:0045892; GO:0016740; GO:0016568; GO:0008270; GO:0008168; GO:0007275; GO:0007067; GO:0007059; GO:0007049; GO:0005694; GO:0005634; GO:0003677; GO:0001947
chr5:110074711-110111964	SLC25A46	NM_138773	25.3048	33.2765	0.760441	0.96202			GO:0016021; GO:0016020; GO:0008150; GO:0006810; GO:0005743; GO:0005739; GO:0005575; GO:0003674
chr10:111969988-112047185	MXI1	NM_130439	68.4137	90.071	0.759553	0.935219			GO:0042994; GO:0008285; GO:0006355; GO:0005634; GO:0003714; GO:0003677
chr9:136287119-136324508	ADAMTS13	NM_139025	4.42743	5.83102	0.759289	0.978773			GO:0070670; GO:0043171; GO:0042221; GO:0034612; GO:0034341; GO:0030168; GO:0016485; GO:0009986; GO:0009100; GO:0008270; GO:0008237; GO:0008233; GO:0008152; GO:0007229; GO:0007160; GO:0006508; GO:0005615; GO:0005578; GO:0005576; GO:0005515; GO:0005509; GO:0005178; GO:0004222
chr14:56046924-56151302	KTN1	NM_182926	48.9642	64.5053	0.759073	0.935219			GO:0016021; GO:0016020; GO:0007018; GO:0005887; GO:0005789; GO:0005783; GO:0005624; GO:0004872; GO:0003674
chr14:68000007-68067017	PIGH	NM_004569	19.9078	26.2351	0.758823	0.965448	ko00563	phosphatidylinositol glycan anchor biosynthesis, class H	GO:0044267; GO:0043687; GO:0017176; GO:0016757; GO:0016254; GO:0006506; GO:0006501; GO:0006464; GO:0005789; GO:0005783; GO:0005739; GO:0005737; GO:0005730; GO:0005634; GO:0003824; GO:0000506
chr9:125001833-125085743	RBM18	NR_027125	47.1094	62.0931	0.75869	0.947795			GO:0003723; GO:0000166
chr10:18629613-18830688	CACNB2	NM_201571	1.64549	2.17145	0.757784	1	ko05414; ko04010; ko04260; ko05412; ko05410		GO:0070588; GO:0051925; GO:0042383; GO:0007601; GO:0007528; GO:0007411; GO:0007268; GO:0006816; GO:0006811; GO:0006810; GO:0005891; GO:0005887; GO:0005515; GO:0005262; GO:0005246; GO:0005245; GO:0005244
chr13:52506804-52585692	ATP7B	NM_000053	8.37738	11.0648	0.75712	0.962949			GO:0060003; GO:0055085; GO:0051208; GO:0048471; GO:0046872; GO:0046688; GO:0034220; GO:0030001; GO:0016787; GO:0016323; GO:0016023; GO:0016020; GO:0015680; GO:0015677; GO:0007595; GO:0006882; GO:0006878; GO:0006825; GO:0006754; GO:0006200; GO:0005887; GO:0005802; GO:0005794; GO:0005770; GO:0005739; GO:0005737; GO:0005624; GO:0005524; GO:0005515; GO:0005507; GO:0004008; GO:0000166; GO:0000139
chr2:85569077-85581821	RETSAT	NM_017750	132.904	175.674	0.756538	0.907464	ko00830		GO:0055114; GO:0051786; GO:0042572; GO:0031965; GO:0016491; GO:0016020; GO:0009055; GO:0005789; GO:0005783; GO:0005640
chr8:82613565-82633539	ZFAND1	NM_024699	104.259	137.933	0.755867	0.93176			GO:0046872; GO:0008270
chr17:75084724-75085575	C17orf86	NR_027058	43.9043	58.219	0.754123	0.973105
chr6:135502390-135540311	MYB	NM_001130173	5.14685	6.82985	0.753582	0.977825			GO:0051574; GO:0051571; GO:0045944; GO:0045893; GO:0045892; GO:0045624; GO:0016363; GO:0007596; GO:0006355; GO:0006338; GO:0005634; GO:0005515; GO:0003677; GO:0000122
chr22:21354060-21356404	THAP7	NM_001008695	81.7221	108.54	0.752922	0.954778			GO:0070742; GO:0047485; GO:0046872; GO:0045892; GO:0016607; GO:0005694; GO:0005634; GO:0003677
chr20:35729628-35870026	RPN2	NM_002951	570.701	758.207	0.752698	0.887869	ko04141; ko00510		GO:0044267; GO:0043687; GO:0018279; GO:0016740; GO:0016021; GO:0016020; GO:0008250; GO:0006464; GO:0005789; GO:0005783; GO:0005634; GO:0004579
chr4:166243184-166243661	KLHL2	NM_007246	30.7725	40.946	0.751539	0.980881			GO:0015629; GO:0006886; GO:0005856; GO:0005737; GO:0005515; GO:0005215; GO:0003779
chr19:41082756-41097305	SHKBP1	NM_138392	146.982	195.705	0.751039	0.907464			GO:0016020; GO:0008076; GO:0006813; GO:0005249
chr6:32148686-32152416	AGER	NM_001136	9.59982	12.8016	0.749892	0.976652			GO:0055093; GO:0055074; GO:0051092; GO:0050930; GO:0050785; GO:0050729; GO:0048661; GO:0048155; GO:0045087; GO:0043065; GO:0043025; GO:0031175; GO:0030424; GO:0030324; GO:0016020; GO:0010763; GO:0009925; GO:0009611; GO:0007420; GO:0007259; GO:0007166; GO:0006954; GO:0005887; GO:0005886; GO:0005737; GO:0005615; GO:0005576; GO:0005515; GO:0004888; GO:0004872
chr3:128198264-128212820	GATA2	NM_001145661	4.43007	5.91328	0.749173	0.977825			GO:2000178; GO:0070742; GO:0070345; GO:0060872; GO:0060216; GO:0050766; GO:0048873; GO:0048663; GO:0048469; GO:0046872; GO:0045944; GO:0045766; GO:0045746; GO:0045654; GO:0045650; GO:0045648; GO:0045638; GO:0045599; GO:0043565; GO:0043234; GO:0042472; GO:0035854; GO:0035065; GO:0035019; GO:0021983; GO:0021954; GO:0021533; GO:0021514; GO:0008270; GO:0008134; GO:0007596; GO:0006351; GO:0005730; GO:…
chr2:144703580-145061211	GTDC1	NM_001006636	6.51463	8.69744	0.749028	0.977825			GO:0016757; GO:0009058
chr11:22842707-22851409	SVIP	NM_148893	35.4982	47.4611	0.747943	0.957141	ko04141	small VCP/p97-interacting protein	GO:0030868; GO:0005886; GO:0005794; GO:0005783; GO:0000139
chr6:30875944-30894236	VARS2	NM_001167734	54.9741	73.5204	0.747739	0.908455	ko00970; ko00290		GO:0016874; GO:0010467; GO:0006438; GO:0006418; GO:0005739; GO:0005737; GO:0005524; GO:0004832; GO:0000166
chr16:66754798-66766237	DYNC1LI2	NM_006141	55.9303	74.8299	0.747433	0.908455	ko04145; ko04962		GO:0006810; GO:0005874; GO:0005868; GO:0005856; GO:0005813; GO:0005737; GO:0005524; GO:0003774; GO:0000166
chr3:49757615-49761479	GMPPB	NM_021971	95.6489	128.117	0.746575	0.913016	ko00520; ko00051		GO:0044267; GO:0043687; GO:0018279; GO:0016779; GO:0016740; GO:0009298; GO:0009058; GO:0006488; GO:0005525; GO:0004475; GO:0000166
chr16:30014238-30022401	DOC2A	NM_003586	48.7364	65.318	0.74614	0.92184			GO:0045202; GO:0031410; GO:0030672; GO:0030054; GO:0019717; GO:0017158; GO:0016079; GO:0016020; GO:0007399; GO:0007268; GO:0005764; GO:0005544; GO:0005515; GO:0005488; GO:0005215
chr11:67806454-67818366	TCIRG1	NM_006019	65.7595	88.2432	0.745208	0.928355	ko04966; ko00190; ko04142; ko04145; ko05110; ko05120		GO:0055085; GO:0033572; GO:0033177; GO:0016324; GO:0015992; GO:0015991; GO:0015078; GO:0010008; GO:0008286; GO:0008284; GO:0006968; GO:0006879; GO:0006811; GO:0005887; GO:0005886; GO:0005739; GO:0005215
chr6:83777384-83903023	DOPEY1	NM_015018	4.38667	5.89242	0.74446	0.96202			GO:0015031; GO:0007029; GO:0006895; GO:0000139
chrX:56763220-56764017	RP11-278E11.2	NR_002308	944.351	1268.69	0.744351	0.888464		ubiquinol-cytochrome c reductase binding protein pseudogene
chr3:129158941-129239210	IFT122	NM_052985	32.6614	43.8982	0.744026	0.942754			GO:0060271; GO:0060173; GO:0048593; GO:0035050; GO:0032391; GO:0030030; GO:0019861; GO:0010172; GO:0007275; GO:0005932; GO:0005929; GO:0005856; GO:0005737; GO:0001843
chr11:66360646-66373490	CCS	NM_005125	26.9202	36.2442	0.742745	0.978773	ko05014		GO:0055114; GO:0046872; GO:0035434; GO:0030001; GO:0019430; GO:0016532; GO:0015680; GO:0008270; GO:0006801; GO:0005829; GO:0005743; GO:0005737; GO:0005634; GO:0005625; GO:0005622; GO:0005515; GO:0005507; GO:0005375; GO:0004784
chr9:127020195-127115488	NEK6	NM_014397	80.4322	108.467	0.741536	0.908455			GO:2000772; GO:0051225; GO:0046777; GO:0043123; GO:0031572; GO:0030071; GO:0019901; GO:0019894; GO:0018105; GO:0016607; GO:0007346; GO:0007165; GO:0007067; GO:0007059; GO:0007049; GO:0006915; GO:0006468; GO:0005874; GO:0005856; GO:0005815; GO:0005737; GO:0005634; GO:0005524; GO:0005515; GO:0004871; GO:0004674; GO:0000922; GO:0000910; GO:0000287; GO:0000166
chr2:61293005-61365169	KIAA1841	NM_001129993	4.85238	6.54471	0.74142	0.975879
chr22:31892260-32016045	SFI1	NM_001007467	24.0472	32.4421	0.741234	0.939116			GO:0019902; GO:0010923; GO:0005856; GO:0005829; GO:0005814; GO:0005737; GO:0005515; GO:0000278; GO:0000086
chr1:212965169-212990167	TATDN3	NM_001146171	19.737	26.6445	0.740753	0.961059			GO:0046872; GO:0016888; GO:0016787; GO:0005634; GO:0004518
chr17:80400461-80408707	C17orf62	NM_001193653	86.4397	116.71	0.740637	0.91265			GO:0016021; GO:0016020; GO:0005515
chrY:21867300-21906825	KDM5D	NM_001146705	0.192036	0.259346	0.740463	1			GO:0046872; GO:0016706; GO:0016702; GO:0016568; GO:0016491; GO:0008270; GO:0007283; GO:0005634; GO:0005622; GO:0005575; GO:0003677; GO:0003674
chr14:73393039-73426357	DCAF4	NM_015604	5.9931	8.09634	0.740223	0.978773			GO:0080008; GO:0016567
chr11:63448921-63527363	RTN3	NM_201428	198.084	267.718	0.739898	0.889473			GO:0071786; GO:0044419; GO:0016192; GO:0016021; GO:0016020; GO:0006950; GO:0006915; GO:0005794; GO:0005789; GO:0005783; GO:0005615; GO:0000139
chr1:168053246-168105635	GPR161	NM_153832	27.7573	37.5458	0.739292	0.946227			GO:0016021; GO:0007275; GO:0005886; GO:0004930; GO:0004872; GO:0004871
chr17:73717515-73753899	ITGB4	NM_000213	290.185	392.85	0.738666	0.878457	ko05414; ko04810; ko05412; ko05410; ko04510; ko04512		GO:0048870; GO:0034329; GO:0031581; GO:0031252; GO:0030056; GO:0030054; GO:0016021; GO:0009986; GO:0009611; GO:0008305; GO:0007275; GO:0007229; GO:0007160; GO:0007155; GO:0007154; GO:0005886; GO:0005515; GO:0004872
chr8:19261257-19540094	CSGALNACT1	NM_001130518	3.16542	4.28713	0.738354	1	ko00532		GO:0050653; GO:0050651; GO:0050650; GO:0047238; GO:0047237; GO:0046872; GO:0046398; GO:0032580; GO:0030210; GO:0030206; GO:0030198; GO:0030173; GO:0030166; GO:0019276; GO:0016740; GO:0016021; GO:0016020; GO:0015020; GO:0015014; GO:0009653; GO:0008955; GO:0008376; GO:0008283; GO:0008037; GO:0007399; GO:0005794; GO:0005625; GO:0005622
chr17:40610861-40674597	ATP6V0A1	NM_001130021	107.564	145.751	0.737998	0.889759	ko04966; ko00190; ko04142; ko04145; ko05110; ko05120		GO:0055085; GO:0051117; GO:0043231; GO:0042470; GO:0033572; GO:0033177; GO:0031410; GO:0030659; GO:0016021; GO:0015991; GO:0015078; GO:0010008; GO:0008286; GO:0006879; GO:0006811; GO:0005886; GO:0005794; GO:0005737; GO:0005730; GO:0005634; GO:0005515
chr12:100660919-100746235	SCYL2	NM_017988	24.4289	33.161	0.736676	0.937371			GO:2000370; GO:0090090; GO:0048471; GO:0031410; GO:0030136; GO:0016772; GO:0016020; GO:0010008; GO:0008333; GO:0005794; GO:0005768; GO:0005737; GO:0005524; GO:0005515; GO:0005102; GO:0004672; GO:0002092
chr9:139886809-139888503	C9orf142	NM_183241	154.178	209.802	0.734874	0.92348
chr17:40723553-40729747	PSMC3IP	NM_013290	93.5745	127.544	0.733664	0.924121			GO:0050692; GO:0050681; GO:0046966; GO:0045944; GO:0042803; GO:0035259; GO:0030374; GO:0030331; GO:0008150; GO:0007126; GO:0006310; GO:0005634; GO:0005575; GO:0003677
chr3:25760434-25824989	NGLY1	NM_018297	38.9901	53.1578	0.733478	0.944263	ko04141		GO:0046872; GO:0016787; GO:0006516; GO:0005737; GO:0005515; GO:0000224
chr16:14841986-14859270	LOC642799	XM_003118695	0.87216	1.1895	0.733216	1
chr1:17312452-17338446	ATP13A2	NM_022089	68.2801	93.1371	0.733114	0.907464			GO:0046872; GO:0016887; GO:0016820; GO:0016787; GO:0016021; GO:0016020; GO:0015662; GO:0006812; GO:0005764; GO:0005524; GO:0000166
chr14:89029252-89080543	ZC3H14	NM_001160104	71.2648	97.249	0.732808	0.896277			GO:0046872; GO:0016607; GO:0008270; GO:0005737; GO:0005634; GO:0005515; GO:0003723
chr7:1579578-1596088	TMEM184A	NM_001097620	52.4601	71.6721	0.731946	0.881369		transmembrane protein 184A	GO:0016021; GO:0016020
chr5:138609440-138620222	SNHG4	NR_036536	100.706	137.723	0.731221	0.907464
chr19:14843204-14889353	EMR2	NM_013447	20.7332	28.3659	0.73092	0.930604			GO:0016021; GO:0007218; GO:0007186; GO:0007155; GO:0005886; GO:0005509; GO:0004930; GO:0004872; GO:0004871
chr18:46385605-46389575	KIAA0427	NM_001142397	20.7631	28.4485	0.729849	0.943782			GO:0048471; GO:0016070; GO:0006446; GO:0005737; GO:0005515; GO:0000184
chr6:31733341-31763712	VARS	NM_006295	191.004	261.739	0.72975	0.871587	ko00970; ko00290		GO:0016874; GO:0010467; GO:0006438; GO:0006418; GO:0006414; GO:0005829; GO:0005739; GO:0005737; GO:0005622; GO:0005524; GO:0004832; GO:0000166
chr17:42836567-42859214	ADAM11	NM_002390	17.0272	23.3633	0.728801	0.942754			GO:0016021; GO:0008270; GO:0008237; GO:0007229; GO:0006508; GO:0005886; GO:0005178; GO:0004222
chr4:187065994-187093924	FAM149A	NM_015398	5.85387	8.03589	0.728466	0.968683		family with sequence similarity 149, member A
chr16:30767353-30773542	C16orf93	NM_001014979	34.2402	47.0116	0.728335	0.935219
chr6:56322784-56507694	DST	NM_015548	35.6912	49.0169	0.728141	0.871959			GO:0097038; GO:0060053; GO:0051010; GO:0048870; GO:0046907; GO:0045111; GO:0045104; GO:0042995; GO:0042803; GO:0042383; GO:0035371; GO:0033267; GO:0031673; GO:0031581; GO:0031252; GO:0031122; GO:0031110; GO:0030424; GO:0030056; GO:0030054; GO:0030018; GO:0030011; GO:0016023; GO:0016021; GO:0015630; GO:0015629; GO:0014704; GO:0009925; GO:0009898; GO:0009611; GO:0008090; GO:0008022; GO:0007409; GO:…
chr3:66271148-66550945	LRIG1	NM_015541	4.51071	6.19807	0.72776	0.96449			GO:0016021; GO:0016020
chr2:220408744-220417139	OBSL1	NM_015311	187.716	257.948	0.727728	0.939755			GO:0055003; GO:0048471; GO:0031430; GO:0030018; GO:0014704; GO:0008093; GO:0007010
chr5:473333-480928	SLC9A3	NM_004174	16.7389	23.0064	0.727576	0.96202	ko04974; ko04964		GO:0055085; GO:0051384; GO:0031526; GO:0016021; GO:0015385; GO:0015299; GO:0015297; GO:0009986; GO:0007623; GO:0006898; GO:0006885; GO:0006812; GO:0006811; GO:0005903; GO:0005886; GO:0002028
chr11:35684210-35832703	TRIM44	NM_017583	66.5636	91.5138	0.727361	0.879494			GO:0046872; GO:0008270; GO:0005622; GO:0005515
[truncated: 730 more rows]
